# Supplementary material for: Seedless mutant ‘Wuzi Ougan’ (Citrus suavissima Hort. ex Tanaka ‘seedless’) and the wild type were compared by iTRAQ-based quantitative proteomics and integratedly analyzed with transcriptome to improve understanding of male sterility
Source: BMC Genet. 2018 Nov 20;19:106. doi: 10.1186/s12863-018-0693-9 (PMC6245639; doi:10.1186/s12863-018-0693-9)
Supplement: Supplementary file 1 — Table S1. All identification proteins in three stages. “N” indicates MT in three stages, and “Y” indicates WT in three stages. (XLSX 2862 kb) [file 12863_2018_693_MOESM1_ESM.xlsx]

## Sheet: stage 1
Additional file 1 Table S1. All identification proteins in three stages.
"N1" indicates MT in stage1, and "Y1" indicates WT in stage1.
Accession	Description	Coverage	Unique Peptides	Peptides	PSMs	AAs	MW [kDa]	calc. pI	N1-1/IS	N1-2/IS	N1-3/IS	average N1	Y1-1/IS	Y1-2/IS	Y1-3/IS	average Y1	（FC）N1/Y1	t test p value
Ciclev10029626m	pacid=20814707 transcript=Ciclev10029626m locus=Ciclev10029626m.g ID=Ciclev10029626m.v1.0 annot-version=v1.0	39.81	1	5	86	108	11.9576	10.6968	3.16422		3.14901	3.15662	0.813188		0.829344	0.821266	3.8436	2.258e-05
Ciclev10004130m	pacid=20792416 transcript=Ciclev10004130m locus=Ciclev10004130m.g ID=Ciclev10004130m.v1.0 annot-version=v1.0	0.88	1	2	4	1816	207.341	5.0083	1.83237	1.95927	1.96712	1.91958	0.858526	0.69219	0.608055	0.71959	2.66761	0.000150024
Ciclev10000233m	pacid=20785480 transcript=Ciclev10000233m locus=Ciclev10000233m.g ID=Ciclev10000233m.v1.0 annot-version=v1.0	14.01	8	8	18	878	101.369	5.93506	1.06024	1.11612	1.10088	1.09241	0.866325	0.893729	0.864551	0.874868	1.24866	0.000343401
Ciclev10016637m	pacid=20818897 transcript=Ciclev10016637m locus=Ciclev10016637m.g ID=Ciclev10016637m.v1.0 annot-version=v1.0	11.93	2	2	20	218	23.1344	9.77393	1.3547	1.36692	1.34265	1.35475	1.11775	1.06997	1.14679	1.11151	1.21885	0.000488808
Ciclev10009377m	pacid=20794151 transcript=Ciclev10009377m locus=Ciclev10009377m.g ID=Ciclev10009377m.v1.0 annot-version=v1.0	56.96	7	15	296	230	25.8697	9.37842	0.976616	1.01376	1.03851	1.00963	0.818935	0.820371	0.843245	0.827517	1.22007	0.000751422
Ciclev10006760m	pacid=20790276 transcript=Ciclev10006760m locus=Ciclev10006760m.g ID=Ciclev10006760m.v1.0 annot-version=v1.0	1.31	1	1	3	688	77.6731	7.1958	1.62185	1.84197	1.91581	1.79321	0.90559	1.06156	0.872323	0.946492	1.89459	0.00132293
Ciclev10004180m	pacid=20789650 transcript=Ciclev10004180m locus=Ciclev10004180m.g ID=Ciclev10004180m.v1.0 annot-version=v1.0	0.76	1	1	2	1189	133.339	8.14795	1.44426		1.4522	1.44823	0.989663		1.03074	1.0102	1.4336	0.00227278
Ciclev10012973m	pacid=20796998 transcript=Ciclev10012973m locus=Ciclev10012973m.g ID=Ciclev10012973m.v1.0 annot-version=v1.0	22.01	2	2	6	159	17.0587	9.33447	1.17505	1.119	1.06266	1.1189	0.78647	0.732736	0.856115	0.791774	1.41316	0.00247082
Ciclev10015724m	pacid=20818317 transcript=Ciclev10015724m locus=Ciclev10015724m.g ID=Ciclev10015724m.v1.0 annot-version=v1.0	24.79	7	7	19	359	40.3575	5.46533	1.54654	1.39532	1.3435	1.42845	1.03861	1.0112	0.960301	1.00337	1.42366	0.00283944
Ciclev10028970m	pacid=20813079 transcript=Ciclev10028970m locus=Ciclev10028970m.g ID=Ciclev10028970m.v1.0 annot-version=v1.0	15.86	4	4	22	290	33.0718	5.57959	1.10872	1.0484	1.0185	1.05854	0.851897	0.765069	0.837166	0.818044	1.29399	0.00310752
Ciclev10000979m	pacid=20786406 transcript=Ciclev10000979m locus=Ciclev10000979m.g ID=Ciclev10000979m.v1.0 annot-version=v1.0	12.84	5	5	6	483	52.404	5.47803		2.01844	1.92001	1.96923		1.08998	1.06058	1.07528	1.83135	0.00328503
Ciclev10007223m	pacid=20794867 transcript=Ciclev10007223m locus=Ciclev10007223m.g ID=Ciclev10007223m.v1.0 annot-version=v1.0	4.77	10	10	14	2828	316.777	4.79248	1.32355	1.22431	1.32655	1.29147	1.00888	0.98098	1.07877	1.02288	1.26258	0.00377775
Ciclev10030909m	pacid=20804447 transcript=Ciclev10030909m locus=Ciclev10030909m.g ID=Ciclev10030909m.v1.0 annot-version=v1.0	9.24	5	5	8	660	73.1113	8.38232		1.24216	1.20863	1.22539		0.953672	0.961473	0.957572	1.27969	0.00410466
Ciclev10028377m	pacid=20812927 transcript=Ciclev10028377m locus=Ciclev10028377m.g ID=Ciclev10028377m.v1.0 annot-version=v1.0	7.96	3	3	5	465	52.772	8.74854	1.19634	1.49305	1.39706	1.36215	0.843186	0.700812	0.842185	0.795394	1.71255	0.00467389
Ciclev10013139m	pacid=20799102 transcript=Ciclev10013139m locus=Ciclev10013139m.g ID=Ciclev10013139m.v1.0 annot-version=v1.0	20.51	2	2	37	117	11.8508	8.51416	1.43994	1.37191	1.35143	1.38776	1.14433	0.992572	0.95977	1.03222	1.34443	0.00480656
Ciclev10004340m	pacid=20791125 transcript=Ciclev10004340m locus=Ciclev10004340m.g ID=Ciclev10004340m.v1.0 annot-version=v1.0	4.58	3	3	9	808	90.7666	9.40771	1.20724	1.48128	1.46487	1.38446	0.910644	0.745437	0.782786	0.812956	1.703	0.00495867
Ciclev10028645m	pacid=20813627 transcript=Ciclev10028645m locus=Ciclev10028645m.g ID=Ciclev10028645m.v1.0 annot-version=v1.0	8.85	3	3	12	384	40.9285	9.21729	1.13907	1.05163	0.963977	1.05156	0.755727	0.690195	0.61148	0.6858	1.53333	0.00505064
Ciclev10007746m	pacid=20795888 transcript=Ciclev10007746m locus=Ciclev10007746m.g ID=Ciclev10007746m.v1.0 annot-version=v1.0	5.25	2	3	8	628	70.9369	6.90283	0.865794	0.794669	0.794259	0.818241	0.660183	0.672012	0.605563	0.645919	1.26679	0.00535286
Ciclev10028260m	pacid=20812680 transcript=Ciclev10028260m locus=Ciclev10028262m.g ID=Ciclev10028260m.v1.0 annot-version=v1.0	13.23	6	6	28	499	55.0426	8.74854	1.18332	1.2241	1.13148	1.17963	1.03266	0.96143	0.953856	0.982649	1.20046	0.00582905
Ciclev10003275m	pacid=20788096 transcript=Ciclev10003275m locus=Ciclev10003275m.g ID=Ciclev10003275m.v1.0 annot-version=v1.0	5.57	2	2	3	521	57.2202	8.1333	1.49583	1.48761		1.49172	1.09788	1.15358		1.12573	1.32511	0.005866
Ciclev10012715m	pacid=20798005 transcript=Ciclev10012715m locus=Ciclev10012715m.g ID=Ciclev10012715m.v1.0 annot-version=v1.0	16.89	3	3	5	219	24.2433	6.53662	1.0682	1.1296	1.01687	1.07156	0.882482	0.912005	0.869126	0.887871	1.20688	0.0062792
Ciclev10019616m	pacid=20812069 transcript=Ciclev10019616m locus=Ciclev10019616m.g ID=Ciclev10019616m.v1.0 annot-version=v1.0	9.61	5	5	10	541	61.3155	7.84033	1.25997	1.16617	1.33709	1.25441	1.00095	0.912259	0.863429	0.925547	1.35532	0.00669942
Ciclev10031347m	pacid=20803946 transcript=Ciclev10031347m locus=Ciclev10031347m.g ID=Ciclev10031347m.v1.0 annot-version=v1.0	8.18	3	3	6	489	55.2947	7.60596	1.08667	0.970877	0.996809	1.01812	0.853944	0.810508	0.790499	0.818317	1.24416	0.0073636
Ciclev10028463m	pacid=20812179 transcript=Ciclev10028463m locus=Ciclev10028210m.g ID=Ciclev10028463m.v1.0 annot-version=v1.0	2.49	1	1	3	442	49.635	6.63916		1.93024	2.03052	1.98038		1.14223	1.23658	1.1894	1.66502	0.00749023
Ciclev10008790m	pacid=20794856 transcript=Ciclev10008790m locus=Ciclev10008790m.g ID=Ciclev10008790m.v1.0 annot-version=v1.0	3.14	1	1	2	350	38.3489	8.82178		0.901983	0.964545	0.933264		0.533694	0.562088	0.547891	1.70338	0.00785219
Ciclev10000892m	pacid=20786880 transcript=Ciclev10000892m locus=Ciclev10000782m.g ID=Ciclev10000892m.v1.0 annot-version=v1.0	12.84	4	4	8	514	53.5835	6.21436	1.08344	1.20134	1.16967	1.15148	0.864591	0.968002	0.935922	0.922838	1.24776	0.00802905
Ciclev10022269m	pacid=20811197 transcript=Ciclev10022269m locus=Ciclev10022269m.g ID=Ciclev10022269m.v1.0 annot-version=v1.0	59.62	1	11	80	208	23.1419	7.89893		1.3134	1.2573	1.28535		0.874039	0.814856	0.844448	1.52212	0.00844332
Ciclev10019537m	pacid=20810807 transcript=Ciclev10019537m locus=Ciclev10019537m.g ID=Ciclev10019537m.v1.0 annot-version=v1.0	4.66	3	3	7	558	62.3361	8.67529	1.07152	1.03245	1.06775	1.05724	0.841534	0.940368	0.815677	0.86586	1.22103	0.00873131
Ciclev10027743m	pacid=20814903 transcript=Ciclev10027743m locus=Ciclev10027742m.g ID=Ciclev10027743m.v1.0 annot-version=v1.0	12.63	7	10	27	998	106.773	6.01123	1.32869	1.27211	1.17389	1.25823	1.05452	1.0352	1.02495	1.03822	1.21191	0.00878886
Ciclev10027536m	pacid=20800707 transcript=Ciclev10027536m locus=Ciclev10027536m.g ID=Ciclev10027536m.v1.0 annot-version=v1.0	21.84	2	2	19	87	8.80559	10.9604	0.781054	0.823676	0.914977	0.839902	0.517172	0.597871	0.641742	0.585595	1.43427	0.00910746
Ciclev10028896m	pacid=20812402 transcript=Ciclev10028896m locus=Ciclev10028896m.g ID=Ciclev10028896m.v1.0 annot-version=v1.0	47.25	3	14	74	309	34.224	6.55127	1.21941	1.37685	1.27402	1.29009	1.03059	0.862532	1.00249	0.965205	1.3366	0.00948976
Ciclev10016242m	pacid=20815326 transcript=Ciclev10016242m locus=Ciclev10016242m.g ID=Ciclev10016242m.v1.0 annot-version=v1.0	14.71	4	4	11	272	30.1876	5.59229		1.20401	1.24142	1.22272		1.01421	0.989823	1.00202	1.22025	0.0100808
Ciclev10011318m	pacid=20797330 transcript=Ciclev10011318m locus=Ciclev10011322m.g ID=Ciclev10011318m.v1.0 annot-version=v1.0	26.73	5	16	113	606	66.2092	7.94287	1.25763	1.36048	1.05784	1.22531	0.847813	0.805079	0.75095	0.80128	1.52919	0.0104052
Ciclev10026538m	pacid=20800794 transcript=Ciclev10026538m locus=Ciclev10026538m.g ID=Ciclev10026538m.v1.0 annot-version=v1.0	24.87	3	3	31	197	21.7566	5.30029	1.09894	1.1609	1.28597	1.18194	0.908514	0.94328	0.94687	0.932888	1.26697	0.0115119
Ciclev10015634m	pacid=20815608 transcript=Ciclev10015634m locus=Ciclev10015634m.g ID=Ciclev10015634m.v1.0 annot-version=v1.0	16	6	6	19	375	43.4938	9.21729	1.457	1.38805	1.31365	1.38623	1.1326	1.108	1.2186	1.15307	1.20221	0.0119002
Ciclev10022174m	pacid=20810231 transcript=Ciclev10022174m locus=Ciclev10022174m.g ID=Ciclev10022174m.v1.0 annot-version=v1.0	8.26	2	2	5	218	24.123	5.78271	1.23146	1.31369	1.35307	1.29941	0.872868	1.05477	1.05517	0.99427	1.30689	0.0123579
Ciclev10008739m	pacid=20795319 transcript=Ciclev10008739m locus=Ciclev10008739m.g ID=Ciclev10008739m.v1.0 annot-version=v1.0	30.83	9	9	46	360	37.8612	8.66064	1.17658	1.36694	1.21762	1.25371	0.913558	0.999592	1.0046	0.972585	1.28905	0.0123662
Ciclev10015707m	pacid=20815835 transcript=Ciclev10015707m locus=Ciclev10015707m.g ID=Ciclev10015707m.v1.0 annot-version=v1.0	12.15	4	4	6	362	39.9411	9.08545	1.3899		1.33291	1.36141	1.11034		1.10623	1.10828	1.22839	0.0124998
Ciclev10010078m	pacid=20794004 transcript=Ciclev10010078m locus=Ciclev10010078m.g ID=Ciclev10010078m.v1.0 annot-version=v1.0	39.74	3	3	7	78	8.44822	9.83252	1.23732	1.40019	1.23215	1.28989	1.03404	0.999008	1.08218	1.03841	1.24218	0.0139548
Ciclev10030522m	pacid=20804363 transcript=Ciclev10030522m locus=Ciclev10030522m.g ID=Ciclev10030522m.v1.0 annot-version=v1.0	3.05	4	4	8	1378	154.916	7.63525	1.26564	1.49494	1.34819	1.36959	1.11938	1.04019	1.0796	1.07972	1.26847	0.014954
Ciclev10021831m	pacid=20809026 transcript=Ciclev10021831m locus=Ciclev10021831m.g ID=Ciclev10021831m.v1.0 annot-version=v1.0	17.86	4	4	14	252	28.4301	9.20264	1.1331	1.23713	1.33929	1.23651	0.959008	1.00496	0.995736	0.986567	1.25334	0.0150106
Ciclev10012726m	pacid=20796666 transcript=Ciclev10012726m locus=Ciclev10012726m.g ID=Ciclev10012726m.v1.0 annot-version=v1.0	4.17	1	1	3	216	23.639	9.18799	1.60818	1.89595	1.84301	1.78238	1.00633	1.34101	1.31056	1.2193	1.4618	0.0153512
Ciclev10009993m	pacid=20793159 transcript=Ciclev10009993m locus=Ciclev10009993m.g ID=Ciclev10009993m.v1.0 annot-version=v1.0	17.48	1	2	10	103	11.1826	9.36377	1.06315	1.05239		1.05777	0.705194	0.602274		0.653734	1.61804	0.0160068
Ciclev10008369m	pacid=20792739 transcript=Ciclev10008369m locus=Ciclev10008369m.g ID=Ciclev10008369m.v1.0 annot-version=v1.0	50.35	9	17	102	429	47.97	6.55127	1.62601	1.67548	1.98415	1.76188	1.31579	1.29843	1.34186	1.3187	1.33608	0.0170986
Ciclev10001985m	pacid=20785985 transcript=Ciclev10001985m locus=Ciclev10001844m.g ID=Ciclev10001985m.v1.0 annot-version=v1.0	34.11	5	7	27	302	33.1941	7.79639	2.00695	1.68315	2.40884	2.03298	1.16709	1.16761	1.28902	1.20791	1.68306	0.0181545
Ciclev10021076m	pacid=20809755 transcript=Ciclev10021076m locus=Ciclev10021076m.g ID=Ciclev10021076m.v1.0 annot-version=v1.0	24.4	6	6	20	332	35.8046	6.29053		1.20252	1.30448	1.2535	1.01069	1.01494	1.07628	1.03397	1.21232	0.0183436
Ciclev10007622m	pacid=20794703 transcript=Ciclev10007622m locus=Ciclev10007581m.g ID=Ciclev10007622m.v1.0 annot-version=v1.0	10.64	6	6	15	705	74.4502	6.23975		1.0613	1.05348	1.05739		0.784676	0.697727	0.741201	1.42659	0.0185297
Ciclev10028505m	pacid=20813303 transcript=Ciclev10028505m locus=Ciclev10028505m.g ID=Ciclev10028505m.v1.0 annot-version=v1.0	8	3	3	7	425	46.9494	8.44092	1.14623	1.06818	1.01802	1.07748	0.923356	0.923031	0.825789	0.890726	1.20966	0.0194987
Ciclev10013049m	pacid=20798310 transcript=Ciclev10013049m locus=Ciclev10013049m.g ID=Ciclev10013049m.v1.0 annot-version=v1.0	6.25	1	1	7	144	15.6311	10.1108	1.19155	1.32573	1.13136	1.21622	0.865669	1.02672	0.933403	0.941931	1.29119	0.02074
Ciclev10029469m	pacid=20814160 transcript=Ciclev10029469m locus=Ciclev10029469m.g ID=Ciclev10029469m.v1.0 annot-version=v1.0	6.33	1	1	4	158	17.3222	10.272	1.05111	1.13114	1.08034	1.08753	0.828349	0.7337	0.953702	0.838584	1.29686	0.0214288
Ciclev10020392m	pacid=20808141 transcript=Ciclev10020392m locus=Ciclev10020205m.g ID=Ciclev10020392m.v1.0 annot-version=v1.0	5.62	2	2	5	409	45.6334	5.90967	1.16746	1.36282	1.18949	1.23993	1.01913	1.02567	0.989354	1.01138	1.22597	0.0219564
Ciclev10021386m	pacid=20806427 transcript=Ciclev10021386m locus=Ciclev10021386m.g ID=Ciclev10021386m.v1.0 annot-version=v1.0	5.37	1	1	8	298	31.9663	5.16064		1.31291	1.23631	1.27461		0.951541	1.00069	0.976117	1.3058	0.022464
Ciclev10022219m	pacid=20808776 transcript=Ciclev10022219m locus=Ciclev10022219m.g ID=Ciclev10022219m.v1.0 annot-version=v1.0	13.62	2	3	9	213	24.4204	4.81787		1.02482	1.08346	1.05414		0.864606	0.846647	0.855626	1.23201	0.023041
Ciclev10021949m	pacid=20807756 transcript=Ciclev10021949m locus=Ciclev10021949m.g ID=Ciclev10021949m.v1.0 annot-version=v1.0	35.83	6	6	11	240	27.4443	5.23682	1.12387	1.38718	1.28884	1.26663	0.932421	0.887624	1.03565	0.951897	1.33064	0.0236146
Ciclev10011996m	pacid=20796696 transcript=Ciclev10011996m locus=Ciclev10011996m.g ID=Ciclev10011996m.v1.0 annot-version=v1.0	42.97	9	14	136	370	42.0481	5.77002	1.16633	1.06848	1.06737	1.10073	0.98946	0.885991	0.840465	0.905306	1.21586	0.0236619
Ciclev10017100m	pacid=20817587 transcript=Ciclev10017100m locus=Ciclev10016738m.g ID=Ciclev10017100m.v1.0 annot-version=v1.0	21.53	2	2	38	144	15.922	10.0669		1.15509	1.22376	1.18942		0.970914	0.948712	0.959813	1.23922	0.0238168
Ciclev10024957m	pacid=20800378 transcript=Ciclev10024957m locus=Ciclev10024933m.g ID=Ciclev10024957m.v1.0 annot-version=v1.0	20.34	11	11	27	757	85.4734	5.24951	0.952488	1.07339	0.961965	0.995948	0.860054	0.840578	0.754222	0.818285	1.21712	0.0247099
Ciclev10027663m	pacid=20814781 transcript=Ciclev10027663m locus=Ciclev10027663m.g ID=Ciclev10027663m.v1.0 annot-version=v1.0	0.53	1	1	2	2085	228.849	6.31592		1.21687	1.20485	1.21086		0.886987	0.976254	0.931621	1.29974	0.0250392
Ciclev10009378m	pacid=20793914 transcript=Ciclev10009378m locus=Ciclev10009378m.g ID=Ciclev10009378m.v1.0 annot-version=v1.0	31.3	5	5	16	230	24.9208	5.66846	1.12445	1.04399	1.24746	1.13863	0.923284	0.873853	0.953242	0.916793	1.24197	0.0250784
Ciclev10015902m	pacid=20815975 transcript=Ciclev10015902m locus=Ciclev10015597m.g ID=Ciclev10015902m.v1.0 annot-version=v1.0	19.21	5	6	11	328	37.0712	6.02393	1.14387		1.02891	1.08639	0.831	0.912614	0.853564	0.865726	1.25489	0.025368
Ciclev10020515m	pacid=20809518 transcript=Ciclev10020515m locus=Ciclev10020515m.g ID=Ciclev10020515m.v1.0 annot-version=v1.0	15.56	6	6	16	392	43.413	9.30518	1.45662	1.86617	2.3023	1.87503	1.11935	0.951349	0.977305	1.016	1.8455	0.0262835
Ciclev10005976m	pacid=20791343 transcript=Ciclev10005976m locus=Ciclev10005978m.g ID=Ciclev10005976m.v1.0 annot-version=v1.0	14.74	2	2	6	190	20.8688	9.81787	1.14706	1.05717	1.0888	1.09768	0.863661	0.678802	0.935378	0.825947	1.32899	0.0282666
Ciclev10032086m	pacid=20802454 transcript=Ciclev10032086m locus=Ciclev10032086m.g ID=Ciclev10032086m.v1.0 annot-version=v1.0	32.52	7	7	36	329	36.3057	7.81104	1.12149	1.22802	1.47541	1.27497	0.876104	0.951811	0.917579	0.915165	1.39316	0.0283077
Ciclev10031286m	pacid=20802979 transcript=Ciclev10031286m locus=Ciclev10031286m.g ID=Ciclev10031286m.v1.0 annot-version=v1.0	16.34	9	9	21	508	57.4431	9.17334	1.21463	1.45934	1.52764	1.40054	1.12513	0.987869	1.06128	1.05809	1.32364	0.0292184
Ciclev10010143m	pacid=20793791 transcript=Ciclev10010143m locus=Ciclev10010138m.g ID=Ciclev10010143m.v1.0 annot-version=v1.0	19.61	1	1	4	51	6.45757	12.3081		1.08944	1.1502	1.11982		0.940934	0.909972	0.925453	1.21002	0.029417
Ciclev10014787m	pacid=20816576 transcript=Ciclev10014787m locus=Ciclev10014787m.g ID=Ciclev10014787m.v1.0 annot-version=v1.0	28.06	15	16	75	556	60.9624	9.08545	0.887453	0.848795	0.918993	0.885081	0.809822	0.665705	0.677288	0.717605	1.23338	0.0294607
Ciclev10031329m	pacid=20805547 transcript=Ciclev10031329m locus=Ciclev10031329m.g ID=Ciclev10031329m.v1.0 annot-version=v1.0	9.88	4	5	10	496	56.1904	9.01221	1.23458	1.31701	1.2747	1.27543	1.13977	1.08038	0.921819	1.04732	1.2178	0.0301271
Ciclev10030377m	pacid=20814349 transcript=Ciclev10030377m locus=Ciclev10030377m.g ID=Ciclev10030377m.v1.0 annot-version=v1.0	4.35	1	1	2	138	15.769	8.80713		1.91543	2.31555	2.11549		1.00727	0.966509	0.986892	2.14359	0.030312
Ciclev10023734m	pacid=20811494 transcript=Ciclev10023734m locus=Ciclev10023734m.g ID=Ciclev10023734m.v1.0 annot-version=v1.0	5.73	2	2	4	454	50.1239	8.33838	1.58733	1.1877	1.40265	1.39256	0.997791	1.02973	1.01577	1.01443	1.37275	0.0309601
Ciclev10021407m	pacid=20807193 transcript=Ciclev10021407m locus=Ciclev10020798m.g ID=Ciclev10021407m.v1.0 annot-version=v1.0	31.31	7	7	51	297	31.5896	7.50342	1.16808	1.17406	1.0584	1.13351	1.03423	0.907647	0.887455	0.943109	1.20189	0.032652
Ciclev10019456m	pacid=20806365 transcript=Ciclev10019456m locus=Ciclev10019427m.g ID=Ciclev10019456m.v1.0 annot-version=v1.0	13.62	6	6	8	580	62.9577	7.56201	1.05797	1.2704	1.47517	1.26784	0.955256	0.808631	0.816647	0.860178	1.47393	0.0345851
Ciclev10029536m	pacid=20814713 transcript=Ciclev10029536m locus=Ciclev10029536m.g ID=Ciclev10029536m.v1.0 annot-version=v1.0	6.34	1	1	3	142	15.2955	8.66064		1.74932	1.943	1.84616		1.1975	0.98184	1.08967	1.69424	0.0347997
Ciclev10002355m	pacid=20785740 transcript=Ciclev10002355m locus=Ciclev10002355m.g ID=Ciclev10002355m.v1.0 annot-version=v1.0	11.59	2	2	17	233	25.3221	7.15186		1.22201	1.60549	1.41375	0.927129	0.818905	0.883371	0.876468	1.61301	0.036336
Ciclev10017916m	pacid=20819218 transcript=Ciclev10017916m locus=Ciclev10017916m.g ID=Ciclev10017916m.v1.0 annot-version=v1.0	24.36	1	1	4	78	8.11405	4.65283	1.16262	1.18905		1.17583	0.942001	0.830874		0.886437	1.32647	0.0368098
Ciclev10026789m	pacid=20801852 transcript=Ciclev10026789m locus=Ciclev10026677m.g ID=Ciclev10026789m.v1.0 annot-version=v1.0	6.78	1	1	2	118	12.6893	5.03369		1.18917	1.23594	1.21256		0.942801	1.02174	0.982271	1.23444	0.0374718
Ciclev10015017m	pacid=20816735 transcript=Ciclev10015017m locus=Ciclev10015017m.g ID=Ciclev10015017m.v1.0 annot-version=v1.0	37.04	16	19	106	494	56.1606	5.63037	1.28736	1.39643	1.21566	1.29981	0.986742	1.08604	1.16158	1.07812	1.20563	0.0384802
Ciclev10021353m	pacid=20812094 transcript=Ciclev10021353m locus=Ciclev10020709m.g ID=Ciclev10021353m.v1.0 annot-version=v1.0	21.93	4	5	31	301	33.4149	5.03369	1.12662	1.29028	1.54502	1.32064	0.950402	0.98914	0.903556	0.947699	1.39352	0.0398526
Ciclev10008944m	pacid=20793188 transcript=Ciclev10008944m locus=Ciclev10008944m.g ID=Ciclev10008944m.v1.0 annot-version=v1.0	25.08	4	4	12	319	35.5313	9.01221		1.40482	1.56207	1.48344		1.10664	1.09404	1.10034	1.34817	0.039871
Ciclev10020640m	pacid=20808688 transcript=Ciclev10020640m locus=Ciclev10020640m.g ID=Ciclev10020640m.v1.0 annot-version=v1.0	24.2	5	6	23	376	41.1539	9.08545	1.40404	1.51227	1.78698	1.56776	1.30649	1.09908	1.0922	1.16592	1.34465	0.0399162
Ciclev10009818m	pacid=20792921 transcript=Ciclev10009818m locus=Ciclev10009504m.g ID=Ciclev10009818m.v1.0 annot-version=v1.0	13.01	2	2	8	146	17.3132	9.5542	0.849628	0.955479	1.06114	0.955417	0.785993	0.749028	0.77406	0.769694	1.2413	0.0401626
Ciclev10013191m	pacid=20796637 transcript=Ciclev10013191m locus=Ciclev10013191m.g ID=Ciclev10013191m.v1.0 annot-version=v1.0	20.2	2	2	8	99	10.3993	9.0708	1.51896	1.30475	1.56263	1.46211	1.05475	1.09071	1.28342	1.14296	1.27923	0.0403175
Ciclev10014179m	pacid=20819157 transcript=Ciclev10014179m locus=Ciclev10014179m.g ID=Ciclev10014179m.v1.0 annot-version=v1.0	1.71	2	2	4	938	104.27	5.5542	2.69953	3.94079	1.81846	2.81959	1.02052	0.996138	0.928406	0.981689	2.87218	0.0406357
Ciclev10009409m	pacid=20793037 transcript=Ciclev10009409m locus=Ciclev10008971m.g ID=Ciclev10009409m.v1.0 annot-version=v1.0	4.91	1	1	3	224	24.8163	7.78174		1.0722	1.11276	1.09248		0.931681	0.859962	0.895822	1.21953	0.0411911
Ciclev10011520m	pacid=20797703 transcript=Ciclev10011520m locus=Ciclev10011520m.g ID=Ciclev10011520m.v1.0 annot-version=v1.0	8.27	3	4	8	508	57.7151	8.66064	1.18897	1.12407	0.934415	1.08248	0.908507	0.76052	0.797019	0.822015	1.31687	0.0421072
Ciclev10022378m	pacid=20809005 transcript=Ciclev10022378m locus=Ciclev10022378m.g ID=Ciclev10022378m.v1.0 annot-version=v1.0	31.09	6	6	32	193	21.104	9.49561	1.06002	1.14275	1.19404	1.13227	0.833362	1.00737	0.973826	0.938186	1.20687	0.0424907
Ciclev10029280m	pacid=20812820 transcript=Ciclev10029280m locus=Ciclev10029280m.g ID=Ciclev10029280m.v1.0 annot-version=v1.0	23.81	3	3	26	210	23.2143	7.73779	1.3733	1.23312	1.174	1.26014	1.06359	1.11027	0.9526	1.04216	1.20916	0.0444494
Ciclev10012854m	pacid=20798828 transcript=Ciclev10012854m locus=Ciclev10012680m.g ID=Ciclev10012854m.v1.0 annot-version=v1.0	4.69	1	1	2	192	21.4724	5.03369	1.74384		1.74869	1.74627	0.982132		1.26017	1.12115	1.55757	0.0460788
Ciclev10015268m	pacid=20818155 transcript=Ciclev10015268m locus=Ciclev10015268m.g ID=Ciclev10015268m.v1.0 annot-version=v1.0	7.94	3	3	13	441	49.3776	6.81494	1.07467	1.24838	1.30583	1.20963	1.01391	0.955784	0.749067	0.906252	1.33476	0.0461362
Ciclev10019301m	pacid=20805901 transcript=Ciclev10019301m locus=Ciclev10019301m.g ID=Ciclev10019301m.v1.0 annot-version=v1.0	17.17	8	10	21	629	68.6952	9.0415		1.27515	1.09126	1.1832	0.935945	0.866501	0.970915	0.924454	1.27989	0.0468204
Ciclev10027796m	pacid=20813788 transcript=Ciclev10027796m locus=Ciclev10027796m.g ID=Ciclev10027796m.v1.0 annot-version=v1.0	5.33	3	4	25	863	91.1569	7.75244	0.974649	1.24666	1.13638	1.11923	0.937377	0.848304	0.717447	0.834376	1.3414	0.0486017
Ciclev10019180m	pacid=20810085 transcript=Ciclev10019180m locus=Ciclev10019182m.g ID=Ciclev10019180m.v1.0 annot-version=v1.0	59.73	24	41	483	668	75.256	7.34229	1.06331	1.03297	1.03141	1.04256	1.28905	1.31826	1.28812	1.29847	0.802913	5.79687e-05
Ciclev10018022m	pacid=20816083 transcript=Ciclev10018022m locus=Ciclev10018022m.g ID=Ciclev10018022m.v1.0 annot-version=v1.0	1.67	1	1	3	479	54.2344	8.63135	0.90161	0.905489	0.866235	0.891111	1.13749	1.16622	1.16886	1.15752	0.769845	7.67218e-05
Ciclev10004097m	pacid=20786532 transcript=Ciclev10004097m locus=Ciclev10004097m.g ID=Ciclev10004097m.v1.0 annot-version=v1.0	29.13	6	6	29	254	27.8513	6.66846	0.995802	0.944941	0.969181	0.969975	1.18478	1.17496	1.16646	1.1754	0.825229	0.000192719
Ciclev10030887m	pacid=20805815 transcript=Ciclev10030887m locus=Ciclev10030887m.g ID=Ciclev10030887m.v1.0 annot-version=v1.0	40.24	11	27	266	676	76.144	8.49951	1.00294	0.983733	0.971009	0.985895	1.25294	1.21277	1.18592	1.21721	0.809964	0.000428751
Ciclev10004154m	pacid=20792514 transcript=Ciclev10004154m locus=Ciclev10004154m.g ID=Ciclev10004154m.v1.0 annot-version=v1.0	11.68	13	13	30	1379	153.279	6.20166	1.03284	0.91656	0.93101	0.960138	1.45284	1.3703	1.35495	1.39269	0.689411	0.000811066
Ciclev10025718m	pacid=20799897 transcript=Ciclev10025718m locus=Ciclev10025673m.g ID=Ciclev10025718m.v1.0 annot-version=v1.0	17.11	7	7	20	415	45.1993	7.81104	0.875684	0.794152	0.825347	0.831728	1.00168	1.00191	1.0392	1.01426	0.820033	0.00243695
Ciclev10007633m	pacid=20794098 transcript=Ciclev10007633m locus=Ciclev10007633m.g ID=Ciclev10007633m.v1.0 annot-version=v1.0	67	45	65	1253	700	80.0179	5.10986	0.815511	0.782702	0.858557	0.818923	0.977137	1.01057	0.973353	0.98702	0.829693	0.00252713
Ciclev10004755m	pacid=20790678 transcript=Ciclev10004755m locus=Ciclev10004755m.g ID=Ciclev10004755m.v1.0 annot-version=v1.0	50.39	1	20	672	514	57.8357	5.18604		0.801145	0.789806	0.795476		1.02856	1.00476	1.01666	0.782438	0.00353248
Ciclev10015535m	pacid=20815465 transcript=Ciclev10015535m locus=Ciclev10015535m.g ID=Ciclev10015535m.v1.0 annot-version=v1.0	45.78	12	12	167	391	42.565	6.93213	0.940574	1.0906	1.08846	1.03988	1.35396	1.31593	1.4012	1.35703	0.766289	0.00462144
Ciclev10026889m	pacid=20800389 transcript=Ciclev10026889m locus=Ciclev10026887m.g ID=Ciclev10026889m.v1.0 annot-version=v1.0	11.11	1	1	25	72	8.09785	8.93896	0.884731	0.955488	0.911117	0.917112	1.14136	1.29563	1.18154	1.20618	0.760346	0.0046464
Ciclev10012464m	pacid=20796257 transcript=Ciclev10012464m locus=Ciclev10012464m.g ID=Ciclev10012464m.v1.0 annot-version=v1.0	29.63	7	7	44	270	30.2361	5.51611	1.05965	1.08198	1.17517	1.1056	1.47419	1.33339	1.44678	1.41812	0.779624	0.00497601
Ciclev10006006m	pacid=20791495 transcript=Ciclev10006006m locus=Ciclev10006006m.g ID=Ciclev10006006m.v1.0 annot-version=v1.0	42.93	5	7	37	184	19.4912	9.70068	0.690225	0.633474	0.594405	0.639368	1.08409	1.00342	1.30194	1.12982	0.565904	0.00629187
Ciclev10029287m	pacid=20814505 transcript=Ciclev10029287m locus=Ciclev10029287m.g ID=Ciclev10029287m.v1.0 annot-version=v1.0	31.4	5	5	19	207	23.4047	9.34912	0.577409		0.563697	0.570553	0.716425		0.697518	0.706971	0.807039	0.00724829
Ciclev10025088m	pacid=20800760 transcript=Ciclev10025088m locus=Ciclev10025088m.g ID=Ciclev10025088m.v1.0 annot-version=v1.0	41.11	14	22	131	664	73.2658	7.54736	0.887185	0.830509	0.824309	0.847334	1.08519	1.10802	0.974111	1.05577	0.802572	0.0105225
Ciclev10020809m	pacid=20807980 transcript=Ciclev10020809m locus=Ciclev10020809m.g ID=Ciclev10020809m.v1.0 annot-version=v1.0	43.02	3	13	113	358	38.1731	6.01123	0.923432	0.76874	0.760043	0.817405	1.02453	1.1085	1.08157	1.07153	0.762838	0.0122584
Ciclev10019294m	pacid=20810178 transcript=Ciclev10019294m locus=Ciclev10019294m.g ID=Ciclev10019294m.v1.0 annot-version=v1.0	21.59	11	12	31	630	69.8069	6.31592	0.800064	0.802162	0.913284	0.838503	1.09986	1.21861	1.03255	1.11701	0.750668	0.0134832
Ciclev10025342m	pacid=20800599 transcript=Ciclev10025342m locus=Ciclev10025342m.g ID=Ciclev10025342m.v1.0 annot-version=v1.0	33.71	10	18	99	531	58.7028	8.22119	1.10399	1.09392	1.04682	1.08158	1.25034	1.45122	1.47696	1.39284	0.776526	0.0134846
Ciclev10032021m	pacid=20805140 transcript=Ciclev10032021m locus=Ciclev10032021m.g ID=Ciclev10032021m.v1.0 annot-version=v1.0	54.55	14	15	342	341	37.4868	5.36377	0.939496	0.936669	0.968966	0.948377	1.04765	1.17863	1.19109	1.13913	0.832549	0.0153973
Ciclev10012929m	pacid=20796645 transcript=Ciclev10012929m locus=Ciclev10012929m.g ID=Ciclev10012929m.v1.0 annot-version=v1.0	4.68	1	1	2	171	19.1316	8.42627		0.907548	0.91076	0.909154		1.21449	1.14282	1.17866	0.771349	0.0172543
Ciclev10011768m	pacid=20796499 transcript=Ciclev10011768m locus=Ciclev10011768m.g ID=Ciclev10011768m.v1.0 annot-version=v1.0	25	10	10	32	432	48.744	8.35303	0.912148	0.957166	0.946038	0.938451	1.05428	1.2384	1.17098	1.15456	0.812824	0.0175915
Ciclev10006207m	pacid=20791809 transcript=Ciclev10006207m locus=Ciclev10006197m.g ID=Ciclev10006207m.v1.0 annot-version=v1.0	6.15	2	2	7	130	14.8293	8.11865	0.806047	0.804388	0.959688	0.856708	1.0439	1.23178	1.20938	1.16169	0.737468	0.0177609
Ciclev10011842m	pacid=20797138 transcript=Ciclev10011842m locus=Ciclev10011842m.g ID=Ciclev10011842m.v1.0 annot-version=v1.0	34.13	13	13	77	416	48.2376	8.52881	0.990998	0.873448	0.885033	0.916493	1.08495	1.08545	1.19939	1.12326	0.81592	0.0179209
Ciclev10027912m	pacid=20814092 transcript=Ciclev10027912m locus=Ciclev10027912m.g ID=Ciclev10027912m.v1.0 annot-version=v1.0	24.93	8	17	129	714	77.5966	6.29053	1.25915	0.868775	1.06236	1.06343	1.57418	1.44723	1.4725	1.49797	0.709911	0.0218479
Ciclev10011175m	pacid=20798352 transcript=Ciclev10011175m locus=Ciclev10011175m.g ID=Ciclev10011175m.v1.0 annot-version=v1.0	45.82	5	29	319	718	78.0727	6.53662	0.883692	0.923689	1.08673	0.964704	1.36752	1.30289	1.1546	1.275	0.756629	0.0247368
Ciclev10019941m	pacid=20806533 transcript=Ciclev10019941m locus=Ciclev10019941m.g ID=Ciclev10019941m.v1.0 annot-version=v1.0	18.54	7	7	31	480	52.8785	6.04932		0.823742	0.776935	0.800338		1.09612	1.0263	1.06121	0.754176	0.0249888
Ciclev10027683m	pacid=20812437 transcript=Ciclev10027683m locus=Ciclev10027683m.g ID=Ciclev10027683m.v1.0 annot-version=v1.0	3.81	5	5	11	1392	151.97	7.25439	0.67525	0.744524	0.711671	0.710482	0.936673	0.787193	0.920943	0.881603	0.805898	0.0292514
Ciclev10016111m	pacid=20817579 transcript=Ciclev10016111m locus=Ciclev10016111m.g ID=Ciclev10016111m.v1.0 annot-version=v1.0	4.41	1	2	4	295	34.2541	8.83643	0.997802	0.872386	0.809694	0.893294	1.06998	1.07881	1.18907	1.11262	0.802875	0.0310749
Ciclev10031748m	pacid=20805706 transcript=Ciclev10031748m locus=Ciclev10031748m.g ID=Ciclev10031748m.v1.0 annot-version=v1.0	29.37	9	9	46	395	44.6637	8.22119	0.761785	0.864866	0.90229	0.84298	0.98152	0.981004	1.08335	1.01529	0.830284	0.0333064
Ciclev10000848m	pacid=20786454 transcript=Ciclev10000848m locus=Ciclev10000848m.g ID=Ciclev10000848m.v1.0 annot-version=v1.0	36.26	18	18	144	524	59.9843	9.02686	1.06752	1.04755	1.02531	1.04679	1.39239	1.16225	1.22938	1.26134	0.829905	0.0365365
Ciclev10025933m	pacid=20800796 transcript=Ciclev10025933m locus=Ciclev10025933m.g ID=Ciclev10025933m.v1.0 annot-version=v1.0	29.64	5	7	27	361	38.6487	7.10791	1.05669	0.9534	1.01679	1.00896	1.13632	1.30485	1.43631	1.2925	0.78063	0.0367191
Ciclev10023731m	pacid=20808903 transcript=Ciclev10023731m locus=Ciclev10023731m.g ID=Ciclev10023731m.v1.0 annot-version=v1.0	1.85	1	1	4	325	36.5614	5.99854		0.832545	0.757266	0.794905		1.42371	1.72463	1.57417	0.504969	0.0374045
Ciclev10011049m	pacid=20798988 transcript=Ciclev10011049m locus=Ciclev10011038m.g ID=Ciclev10011049m.v1.0 annot-version=v1.0	0.81	1	1	7	862	97.6266	7.45947		0.795374	0.872414	0.833894		1.14056	1.28051	1.21053	0.688866	0.0421541
Ciclev10025418m	pacid=20799800 transcript=Ciclev10025418m locus=Ciclev10025418m.g ID=Ciclev10025418m.v1.0 annot-version=v1.0	34.85	11	12	58	505	57.0377	5.47803	0.863821	0.71115	0.768617	0.781196	0.961202	1.01145	0.880438	0.951029	0.821422	0.0442762
Ciclev10022328m	pacid=20809046 transcript=Ciclev10022328m locus=Ciclev10022328m.g ID=Ciclev10022328m.v1.0 annot-version=v1.0	40.5	6	6	52	200	21.244	6.94678	0.912422	0.687223	0.839093	0.812912	1.03328	0.976666	1.00812	1.00602	0.808047	0.0474843
Ciclev10028718m	pacid=20812238 transcript=Ciclev10028718m locus=Ciclev10028651m.g ID=Ciclev10028718m.v1.0 annot-version=v1.0	36.41	11	11	45	357	38.9016	6.29053	1.05415	0.90069	0.874981	0.943273	1.06955	1.225	1.1382	1.14425	0.824361	0.0488028
Ciclev10019417m	pacid=20808545 transcript=Ciclev10019417m locus=Ciclev10019417m.g ID=Ciclev10019417m.v1.0 annot-version=v1.0	34.07	7	15	72	590	66.0898	5.16064		0.811094	0.759158	0.785126		0.993967	0.930725	0.962346	0.815846	0.0493925
Ciclev10000615m	pacid=20788124 transcript=Ciclev10000615m locus=Ciclev10000595m.g ID=Ciclev10000615m.v1.0 annot-version=v1.0	29.27	15	15	188	615	67.2795	7.13721	0.91308	0.903205	0.934412	0.916899	1.02054	1.03632	1.03624	1.03103	0.889303	0.000421616
Ciclev10009744m	pacid=20793923 transcript=Ciclev10009744m locus=Ciclev10009743m.g ID=Ciclev10009744m.v1.0 annot-version=v1.0	80.25	10	10	196	162	17.3289	5.35107	0.902062	0.870436	0.880264	0.884254	0.995704	0.983303	0.987021	0.988676	0.894382	0.000482906
Ciclev10002554m	pacid=20788365 transcript=Ciclev10002554m locus=Ciclev10002554m.g ID=Ciclev10002554m.v1.0 annot-version=v1.0	11.17	2	2	14	197	21.6522	6.56592	1.07581	1.09396	1.08351	1.08443	0.985589	1.00944	0.986027	0.993685	1.09132	0.000663539
Ciclev10004524m	pacid=20790595 transcript=Ciclev10004524m locus=Ciclev10004524m.g ID=Ciclev10004524m.v1.0 annot-version=v1.0	41.8	20	28	312	646	71.6645	6.26514	0.941525	0.913948	0.94567	0.933714	1.05883	1.07489	1.04427	1.05933	0.881419	0.000704166
Ciclev10005822m	pacid=20791717 transcript=Ciclev10005822m locus=Ciclev10005822m.g ID=Ciclev10005822m.v1.0 annot-version=v1.0	13.84	3	3	21	224	24.4735	9.05615	1.10792	1.1277	1.09733	1.11098	0.944123	0.960627	0.98955	0.964767	1.15156	0.000792525
Ciclev10000611m	pacid=20786640 transcript=Ciclev10000611m locus=Ciclev10000611m.g ID=Ciclev10000611m.v1.0 annot-version=v1.0	33.93	18	19	71	616	69.1616	7.88428	0.877377	0.887159	0.899826	0.888121	0.981471	1.01743	1.00752	1.00214	0.886223	0.000811023
Ciclev10014640m	pacid=20816429 transcript=Ciclev10014640m locus=Ciclev10014640m.g ID=Ciclev10014640m.v1.0 annot-version=v1.0	64.64	38	39	725	608	64.7439	6.03662	0.943496	0.950201	0.950198	0.947965	1.0228	1.02544	1.05271	1.03365	0.917107	0.000949937
Ciclev10001900m	pacid=20788851 transcript=Ciclev10001900m locus=Ciclev10001195m.g ID=Ciclev10001900m.v1.0 annot-version=v1.0	41.4	9	9	87	314	34.6623	5.35107	0.9729	0.972264	0.994024	0.97973	1.05028	1.07154	1.06004	1.06062	0.923732	0.00101292
Ciclev10014664m	pacid=20816316 transcript=Ciclev10014664m locus=Ciclev10014664m.g ID=Ciclev10014664m.v1.0 annot-version=v1.0	17.17	10	10	33	600	64.8391	8.38232	1.231	1.26642	1.24132	1.24625	1.11853	1.14477	1.11408	1.1258	1.10699	0.0010654
Ciclev10006066m	pacid=20790254 transcript=Ciclev10006066m locus=Ciclev10005625m.g ID=Ciclev10006066m.v1.0 annot-version=v1.0	7.1	1	2	3	169	19.8424	11.3706		1.08645	1.08013	1.08329		1.1828	1.18504	1.18392	0.915002	0.00110853
Ciclev10028766m	pacid=20812839 transcript=Ciclev10028766m locus=Ciclev10028766m.g ID=Ciclev10028766m.v1.0 annot-version=v1.0	31.49	7	13	75	343	37.6934	6.80029	0.9465	0.948534	0.932776	0.942603	1.0677	1.08748	1.12832	1.0945	0.861219	0.00120398
Ciclev10023239m	pacid=20806226 transcript=Ciclev10023239m locus=Ciclev10023239m.g ID=Ciclev10023239m.v1.0 annot-version=v1.0	14.81	1	1	4	54	6.07708	8.67529	1.17683	1.12658	1.13568	1.14636	1.00083	1.0178	1.02006	1.01289	1.13177	0.00130084
Ciclev10011430m	pacid=20796809 transcript=Ciclev10011430m locus=Ciclev10011430m.g ID=Ciclev10011430m.v1.0 annot-version=v1.0	4.05	3	3	8	543	57.3914	9.36377	1.08157	1.08994	1.06469	1.07873	1.1453	1.16679	1.16429	1.15879	0.930909	0.00135004
Ciclev10016829m	pacid=20817981 transcript=Ciclev10016829m locus=Ciclev10016829m.g ID=Ciclev10016829m.v1.0 annot-version=v1.0	84.82	17	17	124	191	20.2029	4.2085	0.917943	0.943849	0.922847	0.928213	0.833705	0.846482	0.859218	0.846469	1.09657	0.00165268
Ciclev10019848m	pacid=20810851 transcript=Ciclev10019848m locus=Ciclev10019848m.g ID=Ciclev10019848m.v1.0 annot-version=v1.0	25.45	8	9	74	495	52.9055	5.89697	1.25273	1.27633	1.32993	1.28633	1.10819	1.11688	1.11385	1.11297	1.15576	0.00165475
Ciclev10032120m	pacid=20803012 transcript=Ciclev10032120m locus=Ciclev10032120m.g ID=Ciclev10032120m.v1.0 annot-version=v1.0	19.5	5	5	35	323	34.052	9.48096	0.859464	0.835954	0.846277	0.847232	0.985999	1.05547	0.999278	1.01358	0.835878	0.00174132
Ciclev10004120m	pacid=20789553 transcript=Ciclev10004120m locus=Ciclev10004120m.g ID=Ciclev10004120m.v1.0 annot-version=v1.0	20.67	30	30	69	2230	245.125	7.26904	1.02447	1.01352	1.00243	1.01347	1.1147	1.17083	1.13984	1.14179	0.887617	0.00181574
Ciclev10020300m	pacid=20807470 transcript=Ciclev10020300m locus=Ciclev10020300m.g ID=Ciclev10020300m.v1.0 annot-version=v1.0	61.37	25	25	248	422	45.2319	6.31592	0.990649	0.981521	0.977784	0.983318	1.02795	1.03225	1.04944	1.03655	0.948648	0.00218475
Ciclev10027717m	pacid=20814540 transcript=Ciclev10027717m locus=Ciclev10027704m.g ID=Ciclev10027717m.v1.0 annot-version=v1.0	38.22	25	37	341	1099	122.129	5.35107	0.930323	0.959383	0.921554	0.937087	1.01511	1.01681	1.02693	1.01962	0.919057	0.00235131
Ciclev10000921m	pacid=20786248 transcript=Ciclev10000921m locus=Ciclev10000921m.g ID=Ciclev10000921m.v1.0 annot-version=v1.0	37.62	20	20	119	505	57.9807	9.20264	0.996624	1.0076	1.02961	1.01128	1.12824	1.15326	1.19606	1.15919	0.872403	0.00256958
Ciclev10031191m	pacid=20804945 transcript=Ciclev10031191m locus=Ciclev10031191m.g ID=Ciclev10031191m.v1.0 annot-version=v1.0	48.41	25	26	205	535	59.3637	5.85889	0.936489	0.902491	0.914677	0.917885	0.997127	0.983141	1.00362	0.994631	0.922841	0.00273848
Ciclev10011509m	pacid=20799206 transcript=Ciclev10011509m locus=Ciclev10011509m.g ID=Ciclev10011509m.v1.0 annot-version=v1.0	24.12	10	10	53	514	56.5148	7.56201	0.919373	0.947289	0.936852	0.934505	1.0244	1.07684	1.04408	1.04844	0.891325	0.00276787
Ciclev10018960m	pacid=20809841 transcript=Ciclev10018960m locus=Ciclev10018764m.g ID=Ciclev10018960m.v1.0 annot-version=v1.0	26.43	5	22	131	768	88.3981	5.5415	0.891325	0.876661	0.821381	0.863122	1.02415	1.00403	1.04726	1.02515	0.841948	0.00278789
Ciclev10033595m	pacid=20804926 transcript=Ciclev10033595m locus=Ciclev10033595m.g ID=Ciclev10033595m.v1.0 annot-version=v1.0	50.39	8	20	479	385	41.8716	9.70068	0.941704	0.905481	0.921459	0.922881	1.06299	1.01403	1.02865	1.03522	0.891482	0.00328944
Ciclev10017055m	pacid=20817002 transcript=Ciclev10017055m locus=Ciclev10017055m.g ID=Ciclev10017055m.v1.0 annot-version=v1.0	49.35	9	9	119	154	17.3497	5.66846	0.964153	0.924834	0.998611	0.962533	1.10976	1.13421	1.173	1.13899	0.845075	0.00331135
Ciclev10032658m	pacid=20804453 transcript=Ciclev10032658m locus=Ciclev10032658m.g ID=Ciclev10032658m.v1.0 annot-version=v1.0	18.34	4	4	11	229	24.4739	7.38623	0.896668	0.920084	0.954237	0.923663	1.11262	1.04916	1.06791	1.07656	0.857975	0.0037131
Ciclev10001371m	pacid=20788880 transcript=Ciclev10001371m locus=Ciclev10001371m.g ID=Ciclev10001371m.v1.0 annot-version=v1.0	21.75	6	7	49	400	43.7834	8.23584	1.3	1.25905	1.22358	1.26088	1.02635	1.09382	1.09273	1.07097	1.17733	0.00376511
Ciclev10000891m	pacid=20787766 transcript=Ciclev10000891m locus=Ciclev10000891m.g ID=Ciclev10000891m.v1.0 annot-version=v1.0	8.35	2	2	8	515	57.7557	5.5542	1.09586	1.11998	1.1837	1.13318	0.979794	0.953223	0.934512	0.955843	1.18553	0.00376578
Ciclev10004776m	pacid=20790662 transcript=Ciclev10004776m locus=Ciclev10004776m.g ID=Ciclev10004776m.v1.0 annot-version=v1.0	33.07	16	16	73	511	55.6458	7.04932	0.951103	0.945857	0.940828	0.94593	1.00775	0.995802	0.981571	0.995043	0.950642	0.00378453
Ciclev10032389m	pacid=20803220 transcript=Ciclev10032389m locus=Ciclev10032389m.g ID=Ciclev10032389m.v1.0 annot-version=v1.0	29.78	7	8	48	272	29.331	7.69385	0.93041	0.970795	0.977945	0.959717	1.04848	1.05956	1.07659	1.06154	0.904077	0.00382873
Ciclev10020118m	pacid=20810947 transcript=Ciclev10020118m locus=Ciclev10020118m.g ID=Ciclev10020118m.v1.0 annot-version=v1.0	50.22	22	22	232	450	49.0745	7.04932	0.919034	0.891568	0.883163	0.897922	0.962249	0.983166	0.970374	0.97193	0.923855	0.00398802
Ciclev10001212m	pacid=20788309 transcript=Ciclev10001212m locus=Ciclev10001212m.g ID=Ciclev10001212m.v1.0 annot-version=v1.0	32.79	13	13	252	433	46.3148	9.02686	1.43916	1.33896	1.39345	1.39053	1.21044	1.14001	1.1893	1.17991	1.1785	0.00412834
Ciclev10031326m	pacid=20805519 transcript=Ciclev10031326m locus=Ciclev10031326m.g ID=Ciclev10031326m.v1.0 annot-version=v1.0	30.78	12	13	74	497	56.67	7.34229	0.917713	0.894312	0.886211	0.899412	1.00266	0.98812	1.04328	1.01135	0.889315	0.00416464
Ciclev10011450m	pacid=20798591 transcript=Ciclev10011450m locus=Ciclev10011450m.g ID=Ciclev10011450m.v1.0 annot-version=v1.0	55.51	25	25	324	535	58.9488	6.49365	0.92791	0.886681	0.921789	0.912127	0.992675	0.987361	1.00831	0.996116	0.915683	0.00419936
Ciclev10022900m	pacid=20806865 transcript=Ciclev10022900m locus=Ciclev10022900m.g ID=Ciclev10022900m.v1.0 annot-version=v1.0	33.33	1	4	77	120	13.6588	11.5903	0.981648	0.992661	1.00455	0.992953	0.893568	0.935067	0.910389	0.913008	1.08756	0.00435105
Ciclev10015086m	pacid=20816294 transcript=Ciclev10015086m locus=Ciclev10015086m.g ID=Ciclev10015086m.v1.0 annot-version=v1.0	18.96	9	9	38	480	52.3412	7.40088	1.02189	1.1003	1.01343	1.04521	1.21939	1.23273	1.19498	1.2157	0.859756	0.00460742
Ciclev10031881m	pacid=20805610 transcript=Ciclev10031881m locus=Ciclev10031881m.g ID=Ciclev10031881m.v1.0 annot-version=v1.0	51.09	14	14	120	368	39.8479	8.36768	1.09195	1.10076	1.07794	1.09021	1.14178	1.13835	1.16262	1.14759	0.950006	0.00470789
Ciclev10011000m	pacid=20797679 transcript=Ciclev10011000m locus=Ciclev10011000m.g ID=Ciclev10011000m.v1.0 annot-version=v1.0	23.43	9	20	96	956	105.216	6.52197	0.983392	1.01519	1.01389	1.00416	0.857367	0.909766	0.906461	0.891198	1.12675	0.00473055
Ciclev10032349m	pacid=20805412 transcript=Ciclev10032349m locus=Ciclev10032349m.g ID=Ciclev10032349m.v1.0 annot-version=v1.0	62.14	14	14	104	280	31.1439	7.54736	0.960605	0.948775	0.932684	0.947354	1.02433	1.0801	1.07911	1.06118	0.892737	0.00481703
Ciclev10021774m	pacid=20810163 transcript=Ciclev10021774m locus=Ciclev10021673m.g ID=Ciclev10021774m.v1.0 annot-version=v1.0	20.85	4	4	14	259	30.7855	10.1987	1.08494	1.11914	1.04843	1.08417	0.944893	0.92228	0.868022	0.911731	1.18914	0.00488624
Ciclev10014238m	pacid=20818311 transcript=Ciclev10014238m locus=Ciclev10014224m.g ID=Ciclev10014238m.v1.0 annot-version=v1.0	11.7	7	7	29	863	92.6408	5.90967	0.983935	0.987534	0.949589	0.973686	1.04093	1.06481	1.0731	1.05961	0.918907	0.00513915
Ciclev10001202m	pacid=20786427 transcript=Ciclev10001202m locus=Ciclev10001202m.g ID=Ciclev10001202m.v1.0 annot-version=v1.0	32.95	12	12	83	434	47.677	7.02002	0.953445	0.969545	1.02273	0.981907	1.10859	1.08701	1.11865	1.10475	0.888803	0.00584749
Ciclev10004902m	pacid=20792483 transcript=Ciclev10004902m locus=Ciclev10004902m.g ID=Ciclev10004902m.v1.0 annot-version=v1.0	70.28	27	28	370	471	51.7611	7.10791	0.918793	0.906158	0.92402	0.916324	1.00772	0.973924	1.02571	1.00245	0.914081	0.00586113
Ciclev10012341m	pacid=20797278 transcript=Ciclev10012341m locus=Ciclev10012320m.g ID=Ciclev10012341m.v1.0 annot-version=v1.0	24.83	5	7	27	294	33.8836	7.51807	1.02122	0.982427	1.04354	1.01573	0.899724	0.883043	0.92291	0.901892	1.12622	0.00587682
Ciclev10019878m	pacid=20811541 transcript=Ciclev10019878m locus=Ciclev10019878m.g ID=Ciclev10019878m.v1.0 annot-version=v1.0	6.92	2	2	6	491	54.413	8.20654	1.04195	1.13565	1.05987	1.07916	0.916575	0.922678	0.871658	0.903637	1.19424	0.00595422
Ciclev10028518m	pacid=20813986 transcript=Ciclev10028518m locus=Ciclev10028518m.g ID=Ciclev10028518m.v1.0 annot-version=v1.0	33.89	13	14	58	419	47.9015	6.72705	0.967541	0.92867	1.00069	0.965634	1.07586	1.13193	1.12646	1.11142	0.868833	0.00601739
Ciclev10002705m	pacid=20786806 transcript=Ciclev10002705m locus=Ciclev10002705m.g ID=Ciclev10002705m.v1.0 annot-version=v1.0	23.35	1	3	18	167	19.0557	8.646	1.04728	1.0606	1.07111	1.05966	0.97775	0.916878	0.966713	0.95378	1.11101	0.00606175
Ciclev10002730m	pacid=20788905 transcript=Ciclev10002730m locus=Ciclev10002730m.g ID=Ciclev10002730m.v1.0 annot-version=v1.0	14.11	2	2	6	163	18.801	9.42236		0.904565	0.925692	0.915128		1.05465	1.06304	1.05884	0.864271	0.00619483
Ciclev10007872m	pacid=20795879 transcript=Ciclev10007872m locus=Ciclev10007872m.g ID=Ciclev10007872m.v1.0 annot-version=v1.0	38.27	21	21	139	567	63.7796	5.96045	0.992048	1.03501	1.00516	1.01074	0.947696	0.934189	0.940383	0.940756	1.07439	0.00624094
Ciclev10002113m	pacid=20786602 transcript=Ciclev10002113m locus=Ciclev10002113m.g ID=Ciclev10002113m.v1.0 annot-version=v1.0	3.58	1	1	2	279	31.6704	5.85889		1.07254	1.08046	1.0765		0.898581	0.923619	0.9111	1.18154	0.00624312
Ciclev10008520m	pacid=20796065 transcript=Ciclev10008520m locus=Ciclev10008520m.g ID=Ciclev10008520m.v1.0 annot-version=v1.0	37.34	14	14	93	399	43.0981	8.89502	0.985426	0.982699	0.970419	0.979515	1.09436	1.08175	1.16252	1.11288	0.880164	0.00639141
Ciclev10019724m	pacid=20807002 transcript=Ciclev10019724m locus=Ciclev10019724m.g ID=Ciclev10019724m.v1.0 annot-version=v1.0	37.31	13	14	51	520	58.3142	6.49365	0.888021	0.910982	0.904366	0.901123	0.941801	0.950618	0.966523	0.952981	0.945584	0.00645119
Ciclev10018737m	pacid=20809402 transcript=Ciclev10018737m locus=Ciclev10018737m.g ID=Ciclev10018737m.v1.0 annot-version=v1.0	37.42	15	29	199	954	105.018	6.44287	0.881831	0.910377	0.878995	0.890401	0.95687	0.997988	0.965681	0.973513	0.914627	0.0065707
Ciclev10005251m	pacid=20791064 transcript=Ciclev10005251m locus=Ciclev10005251m.g ID=Ciclev10005251m.v1.0 annot-version=v1.0	67.69	19	21	637	359	39.771	5.69385	1.12163	1.03349	1.07596	1.07702	1.24992	1.24771	1.20044	1.23269	0.873719	0.00667372
Ciclev10032709m	pacid=20802802 transcript=Ciclev10032709m locus=Ciclev10032709m.g ID=Ciclev10032709m.v1.0 annot-version=v1.0	12.79	2	3	9	219	25.0431	8.66064	1.0322	1.12252	1.06997	1.07489	0.892836	0.948146	0.895345	0.912109	1.17847	0.00688891
Ciclev10020395m	pacid=20809498 transcript=Ciclev10020395m locus=Ciclev10019992m.g ID=Ciclev10020395m.v1.0 annot-version=v1.0	9.29	4	4	9	409	46.7461	9.21729	0.926531	0.954806	0.861495	0.914277	1.05688	1.0577	1.05247	1.05569	0.866051	0.0069336
Ciclev10009417m	pacid=20795602 transcript=Ciclev10009417m locus=Ciclev10009392m.g ID=Ciclev10009417m.v1.0 annot-version=v1.0	20.27	3	3	10	222	24.9492	9.51025	1.01256	1.04213	1.00656	1.02042	0.952986	0.960415	0.968304	0.960568	1.0623	0.00722848
Ciclev10008489m	pacid=20793693 transcript=Ciclev10008489m locus=Ciclev10008489m.g ID=Ciclev10008489m.v1.0 annot-version=v1.0	51.11	12	20	160	407	44.602	8.35303	1.02104	0.981145	0.950521	0.984235	1.08456	1.12518	1.10006	1.10327	0.892108	0.00725952
Ciclev10021496m	pacid=20810781 transcript=Ciclev10021496m locus=Ciclev10021031m.g ID=Ciclev10021496m.v1.0 annot-version=v1.0	12.2	4	4	10	287	31.9371	6.75635	0.958059	0.987853	0.965732	0.970548	1.04092	1.04199	1.01537	1.03276	0.939763	0.00754725
Ciclev10025009m	pacid=20800364 transcript=Ciclev10025009m locus=Ciclev10025009m.g ID=Ciclev10025009m.v1.0 annot-version=v1.0	44.48	27	27	120	724	79.394	4.93213	0.977917	0.955788	0.966777	0.966827	1.07324	1.02124	1.06608	1.05352	0.917708	0.00770889
Ciclev10015973m	pacid=20817872 transcript=Ciclev10015973m locus=Ciclev10015979m.g ID=Ciclev10015973m.v1.0 annot-version=v1.0	12.3	4	4	5	317	36.5621	9.49561	0.978408		0.990272	0.98434	0.917214		0.913793	0.915504	1.07519	0.00794802
Ciclev10006210m	pacid=20791966 transcript=Ciclev10006210m locus=Ciclev10006210m.g ID=Ciclev10006210m.v1.0 annot-version=v1.0	25.78	3	3	10	128	14.8757	9.40771	1.00733	1.06436	1.00688	1.02619	0.934924	0.895596	0.920465	0.916995	1.11908	0.00803162
Ciclev10015815m	pacid=20816798 transcript=Ciclev10015815m locus=Ciclev10015815m.g ID=Ciclev10015815m.v1.0 annot-version=v1.0	10.69	3	3	5	346	39.0404	4.88135	1.06956		1.09809	1.08382	0.926302		0.928428	0.927365	1.16871	0.00825355
Ciclev10018756m	pacid=20807139 transcript=Ciclev10018756m locus=Ciclev10018756m.g ID=Ciclev10018756m.v1.0 annot-version=v1.0	47.6	36	36	189	918	101.036	7.18115	0.979772	0.948462	0.906535	0.944923	1.03774	1.07324	1.07817	1.06305	0.888879	0.00881333
Ciclev10015188m	pacid=20818618 transcript=Ciclev10015188m locus=Ciclev10015188m.g ID=Ciclev10015188m.v1.0 annot-version=v1.0	17.69	5	5	10	458	50.1556	6.60986	1.08245	1.04485	1.03128	1.05286	0.95635	0.981201	0.976564	0.971372	1.08389	0.00887479
Ciclev10006560m	pacid=20791490 transcript=Ciclev10006560m locus=Ciclev10006560m.g ID=Ciclev10006560m.v1.0 annot-version=v1.0	11.62	2	2	3	198	21.7562	9.65674		1.04795	1.0586	1.05327		0.964095	0.97581	0.969953	1.0859	0.00890383
Ciclev10018991m	pacid=20809720 transcript=Ciclev10018991m locus=Ciclev10018991m.g ID=Ciclev10018991m.v1.0 annot-version=v1.0	46.26	31	31	402	748	80.6577	6.7417	1.00575	1.02406	1.01104	1.01362	1.05747	1.08379	1.10289	1.08138	0.937336	0.00892705
Ciclev10032595m	pacid=20803735 transcript=Ciclev10032595m locus=Ciclev10032090m.g ID=Ciclev10032595m.v1.0 annot-version=v1.0	2.49	1	1	2	241	26.9989	9.72998		0.986697	0.969071	0.977884		1.07113	1.06973	1.07043	0.913544	0.00900209
Ciclev10024684m	pacid=20800185 transcript=Ciclev10024684m locus=Ciclev10024684m.g ID=Ciclev10024684m.v1.0 annot-version=v1.0	17.01	27	27	92	2111	225.152	5.38916	1.045	1.02948	0.981613	1.0187	0.933681	0.913366	0.928392	0.925146	1.10112	0.0095029
Ciclev10010893m	pacid=20797180 transcript=Ciclev10010893m locus=Ciclev10010893m.g ID=Ciclev10010893m.v1.0 annot-version=v1.0	6.65	12	12	37	1834	207.052	6.27783	0.956685	1.06377	1.04774	1.02273	0.843067	0.876731	0.863232	0.86101	1.18783	0.00963434
Ciclev10003566m	pacid=20785444 transcript=Ciclev10003566m locus=Ciclev10003566m.g ID=Ciclev10003566m.v1.0 annot-version=v1.0	53.35	19	23	457	418	47.6822	6.17627	0.978544	0.970199	0.972262	0.973668	1.01722	1.06991	1.05106	1.04606	0.930792	0.00976475
Ciclev10005101m	pacid=20789514 transcript=Ciclev10005101m locus=Ciclev10005101m.g ID=Ciclev10005101m.v1.0 annot-version=v1.0	80.8	27	31	492	401	42.3065	6.29053	0.933687	0.887199	0.855422	0.892103	0.990372	1.01233	1.0008	1.00117	0.891063	0.00986175
Ciclev10018463m	pacid=20811667 transcript=Ciclev10018463m locus=Ciclev10018463m.g ID=Ciclev10018463m.v1.0 annot-version=v1.0	17.59	29	30	105	1779	198.817	5.57959	1.01357	0.984162	1.01695	1.00489	1.07463	1.05178	1.05902	1.06181	0.946398	0.0101194
Ciclev10014686m	pacid=20816113 transcript=Ciclev10014686m locus=Ciclev10014686m.g ID=Ciclev10014686m.v1.0 annot-version=v1.0	29.12	14	18	124	594	64.6306	8.82178	0.918014	0.896554	0.895147	0.903238	0.948517	0.954911	0.982715	0.962048	0.93887	0.0101893
Ciclev10001908m	pacid=20787696 transcript=Ciclev10001908m locus=Ciclev10001908m.g ID=Ciclev10001908m.v1.0 annot-version=v1.0	47.76	11	11	125	312	34.8096	6.7124	0.99484	0.978456	0.984951	0.986082	0.904512	0.823911	0.887763	0.872062	1.13075	0.0103523
Ciclev10000643m	pacid=20789068 transcript=Ciclev10000643m locus=Ciclev10000643m.g ID=Ciclev10000643m.v1.0 annot-version=v1.0	17.3	9	10	28	601	68.5415	8.38232	1.21717	1.21761	1.15773	1.1975	1.07578	0.98992	1.0674	1.04437	1.14663	0.0105734
Ciclev10021950m	pacid=20808798 transcript=Ciclev10021950m locus=Ciclev10021950m.g ID=Ciclev10021950m.v1.0 annot-version=v1.0	19.17	4	4	8	240	27.0825	4.93213	1.0591	1.09615	1.08863	1.08129	1.02089	0.962753	0.974008	0.985883	1.09678	0.0106254
Ciclev10028454m	pacid=20814868 transcript=Ciclev10028454m locus=Ciclev10028454m.g ID=Ciclev10028454m.v1.0 annot-version=v1.0	12.81	6	7	21	445	48.4269	7.34229	0.92138	0.907839	0.975117	0.934779	1.09229	1.102	1.02855	1.07428	0.870144	0.0106622
Ciclev10026719m	pacid=20802119 transcript=Ciclev10026719m locus=Ciclev10026719m.g ID=Ciclev10026719m.v1.0 annot-version=v1.0	47.26	11	11	132	146	16.8252	10.9019	1.05094	1.07778	1.05686	1.06186	0.94674	0.868525	0.962935	0.926067	1.14663	0.0109318
Ciclev10004868m	pacid=20790004 transcript=Ciclev10004868m locus=Ciclev10004868m.g ID=Ciclev10004868m.v1.0 annot-version=v1.0	30.56	12	12	74	481	53.5055	6.82959	1.03751	0.990974	0.998699	1.00906	1.11665	1.14323	1.08014	1.11334	0.906335	0.0109869
Ciclev10011982m	pacid=20796377 transcript=Ciclev10011982m locus=Ciclev10011982m.g ID=Ciclev10011982m.v1.0 annot-version=v1.0	25.6	8	8	20	375	41.7196	8.77783		1.06654	1.04924	1.05789		0.873568	0.905024	0.889296	1.18958	0.0111441
Ciclev10030974m	pacid=20805286 transcript=Ciclev10030974m locus=Ciclev10030974m.g ID=Ciclev10030974m.v1.0 annot-version=v1.0	42.1	22	22	117	620	69.9815	5.37646	0.87834	0.920742	0.879386	0.892823	0.964927	0.956066	0.951491	0.957495	0.932457	0.011184
Ciclev10010989m	pacid=20797427 transcript=Ciclev10010989m locus=Ciclev10010989m.g ID=Ciclev10010989m.v1.0 annot-version=v1.0	19.79	15	15	40	975	112.712	6.52197	0.941097	0.937198	0.970522	0.949605	0.997786	0.997867	1.01709	1.00425	0.94559	0.0113854
Ciclev10008938m	pacid=20794190 transcript=Ciclev10008938m locus=Ciclev10008440m.g ID=Ciclev10008938m.v1.0 annot-version=v1.0	25.94	6	8	46	320	35.5472	6.13818	0.863817	0.836964	0.896482	0.865754	0.957306	0.936356	0.946038	0.946567	0.914626	0.0114222
Ciclev10024683m	pacid=20801164 transcript=Ciclev10024683m locus=Ciclev10024683m.g ID=Ciclev10024683m.v1.0 annot-version=v1.0	24.14	49	50	195	2357	275.221	8.76318	0.901991	0.947384	0.908257	0.919211	1.01817	1.03176	0.981614	1.01051	0.909647	0.011473
Ciclev10000372m	pacid=20786270 transcript=Ciclev10000372m locus=Ciclev10000372m.g ID=Ciclev10000372m.v1.0 annot-version=v1.0	10.64	6	6	18	761	83.7078	5.18604	0.995955	1.02378	0.992637	1.00413	1.08142	1.1021	1.15818	1.1139	0.90145	0.011722
Ciclev10008874m	pacid=20792961 transcript=Ciclev10008874m locus=Ciclev10008874m.g ID=Ciclev10008874m.v1.0 annot-version=v1.0	2.1	1	1	3	333	38.5605	7.00537	1.08449	1.15887	1.20038	1.14791	0.999458	1.00513	0.962424	0.989003	1.16068	0.0120629
Ciclev10004456m	pacid=20792529 transcript=Ciclev10004456m locus=Ciclev10004456m.g ID=Ciclev10004456m.v1.0 annot-version=v1.0	42.92	10	36	472	699	80.5498	5.09717	0.933504	0.913852	0.948934	0.932097	1.01526	1.0243	1.08954	1.04304	0.893638	0.0121622
Ciclev10019761m	pacid=20806136 transcript=Ciclev10019761m locus=Ciclev10019752m.g ID=Ciclev10019761m.v1.0 annot-version=v1.0	9.77	5	5	27	512	56.3243	8.6167	0.962553	0.8954	0.870809	0.909587	1.018	1.03841	1.04926	1.03522	0.878639	0.012196
Ciclev10028839m	pacid=20814510 transcript=Ciclev10028839m locus=Ciclev10028839m.g ID=Ciclev10028839m.v1.0 annot-version=v1.0	23.84	9	9	38	323	35.4283	6.23975	0.891161	0.935261	0.923929	0.916784	0.979087	0.986382	1.0187	0.994722	0.921648	0.0122836
Ciclev10012049m	pacid=20797658 transcript=Ciclev10012049m locus=Ciclev10012049m.g ID=Ciclev10012049m.v1.0 annot-version=v1.0	74.02	25	25	527	358	38.583	7.91357	0.938026	0.863804	0.856812	0.886214	1.0003	1.05029	1.00467	1.01842	0.870184	0.0123159
Ciclev10020210m	pacid=20810633 transcript=Ciclev10020210m locus=Ciclev10020210m.g ID=Ciclev10020210m.v1.0 annot-version=v1.0	43.09	16	16	112	434	47.9813	7.7085	0.90131	0.861068	0.925241	0.895873	0.985378	1.07113	1.06751	1.04134	0.860308	0.0124615
Ciclev10003615m	pacid=20788984 transcript=Ciclev10003615m locus=Ciclev10003615m.g ID=Ciclev10003615m.v1.0 annot-version=v1.0	40.7	8	19	581	398	44.6735	5.31299	0.928344	0.92306	0.96871	0.940038	0.874188	0.882196	0.874136	0.87684	1.07207	0.0125475
Ciclev10006072m	pacid=20789751 transcript=Ciclev10006072m locus=Ciclev10006072m.g ID=Ciclev10006072m.v1.0 annot-version=v1.0	48.21	8	8	58	168	19.1628	4.94482	1.04543	1.09736	0.993252	1.04535	0.923844	0.914006	0.891836	0.909895	1.14886	0.0126579
Ciclev10001639m	pacid=20787220 transcript=Ciclev10001639m locus=Ciclev10001639m.g ID=Ciclev10001639m.v1.0 annot-version=v1.0	5.04	2	2	2	357	40.4366	6.90283		0.8923	0.909907	0.901103		0.98864	1.00088	0.994758	0.905852	0.0128505
Ciclev10004979m	pacid=20792303 transcript=Ciclev10004979m locus=Ciclev10004979m.g ID=Ciclev10004979m.v1.0 annot-version=v1.0	55	18	18	228	440	47.7618	6.30322	0.974859	0.97846	0.994038	0.982452	1.02252	1.04463	1.06925	1.04547	0.939724	0.0128523
Ciclev10031252m	pacid=20804131 transcript=Ciclev10031252m locus=Ciclev10031252m.g ID=Ciclev10031252m.v1.0 annot-version=v1.0	24.56	11	11	48	517	57.6762	7.26904	1.13036	1.08128	1.04794	1.08652	1.33632	1.22471	1.24046	1.26716	0.857446	0.0129446
Ciclev10000154m	pacid=20788161 transcript=Ciclev10000154m locus=Ciclev10000154m.g ID=Ciclev10000154m.v1.0 annot-version=v1.0	46.5	44	46	388	987	114.633	9.17334	0.939261	0.961841	0.92929	0.943464	0.997156	0.980717	0.989854	0.989242	0.953724	0.0130245
Ciclev10001143m	pacid=20788644 transcript=Ciclev10001143m locus=Ciclev10001143m.g ID=Ciclev10001143m.v1.0 annot-version=v1.0	41.83	20	20	124	447	51.0341	6.99072	0.952397	0.906592	0.938944	0.932644	1.01259	1.04409	0.994671	1.01712	0.916947	0.0130653
Ciclev10011817m	pacid=20797933 transcript=Ciclev10011817m locus=Ciclev10011817m.g ID=Ciclev10011817m.v1.0 annot-version=v1.0	32.94	9	9	31	422	46.6375	5.10986	1.03477	1.06046	1.0829	1.05938	1.00061	0.951681	0.951129	0.967807	1.09462	0.0130656
Ciclev10005378m	pacid=20791908 transcript=Ciclev10005378m locus=Ciclev10005378m.g ID=Ciclev10005378m.v1.0 annot-version=v1.0	36.8	10	10	102	337	38.5931	4.83057	0.950097	0.908071	0.926375	0.928181	1.03649	0.986257	1.04712	1.02329	0.907055	0.0131349
Ciclev10014981m	pacid=20815631 transcript=Ciclev10014981m locus=Ciclev10014975m.g ID=Ciclev10014981m.v1.0 annot-version=v1.0	39.44	16	16	102	502	56.378	6.02393	0.888455	0.920899	0.898054	0.902469	1.02285	0.957849	0.996407	0.992369	0.909409	0.0132247
Ciclev10019734m	pacid=20810731 transcript=Ciclev10019734m locus=Ciclev10019734m.g ID=Ciclev10019734m.v1.0 annot-version=v1.0	28.9	15	15	99	519	55.6377	8.1333	0.962323	0.957015	0.926971	0.94877	0.991668	1.0015	1.01217	1.00178	0.947085	0.0132488
Ciclev10032800m	pacid=20804334 transcript=Ciclev10032800m locus=Ciclev10032800m.g ID=Ciclev10032800m.v1.0 annot-version=v1.0	58.88	14	14	181	197	23.0914	10.3452	0.987834	0.970137	1.01758	0.991849	0.91704	0.939349	0.904811	0.9204	1.07763	0.0140497
Ciclev10027585m	pacid=20800239 transcript=Ciclev10027585m locus=Ciclev10027585m.g ID=Ciclev10027585m.v1.0 annot-version=v1.0	8.72	11	11	31	1113	125.57	5.45264	0.984865	0.95632	0.951607	0.964264	1.10039	1.02577	1.09703	1.07439	0.897497	0.0141178
Ciclev10004852m	pacid=20792511 transcript=Ciclev10004852m locus=Ciclev10004852m.g ID=Ciclev10004852m.v1.0 annot-version=v1.0	66.6	28	28	1199	485	53.0591	6.22705	0.965101	0.976904	0.939309	0.960438	1.0267	1.11038	1.10028	1.07912	0.890021	0.0142841
Ciclev10033019m	pacid=20805750 transcript=Ciclev10033019m locus=Ciclev10033019m.g ID=Ciclev10033019m.v1.0 annot-version=v1.0	47.18	5	5	23	142	15.7498	4.58936	1.20564	1.23339	1.24307	1.22737	1.10232	1.16132	1.07538	1.11301	1.10275	0.0145891
Ciclev10022349m	pacid=20811194 transcript=Ciclev10022349m locus=Ciclev10022349m.g ID=Ciclev10022349m.v1.0 annot-version=v1.0	16.75	2	2	5	197	22.7503	9.48096		1.29198	1.27122	1.2816		1.12726	1.15464	1.14095	1.12327	0.0145947
Ciclev10002947m	pacid=20787642 transcript=Ciclev10002947m locus=Ciclev10002947m.g ID=Ciclev10002947m.v1.0 annot-version=v1.0	7.14	1	1	9	98	10.8307	9.59814	0.908451	0.930275	0.953577	0.930768	1.00454	0.982704	1.02458	1.00394	0.927113	0.0146562
Ciclev10030120m	pacid=20814415 transcript=Ciclev10030120m locus=Ciclev10030120m.g ID=Ciclev10030120m.v1.0 annot-version=v1.0	6.04	6	7	14	1175	129.227	5.52881	1.01895	1.12606	1.15344	1.09949	0.925723	0.897863	0.944049	0.922545	1.1918	0.0148753
Ciclev10020487m	pacid=20811894 transcript=Ciclev10020487m locus=Ciclev10020487m.g ID=Ciclev10020487m.v1.0 annot-version=v1.0	43.43	14	16	72	396	45.3159	6.48096	1.00286	1.04983	1.08401	1.04557	0.960658	0.914626	0.926135	0.933806	1.11968	0.014902
Ciclev10024883m	pacid=20799539 transcript=Ciclev10024883m locus=Ciclev10024883m.g ID=Ciclev10024883m.v1.0 annot-version=v1.0	62.68	48	48	677	852	94.0526	5.19873	0.902181	0.887729	0.925294	0.905068	1.02048	1.02286	0.959471	1.00094	0.904221	0.0150016
Ciclev10014186m	pacid=20817776 transcript=Ciclev10014186m locus=Ciclev10014186m.g ID=Ciclev10014186m.v1.0 annot-version=v1.0	33.91	28	33	182	920	102.949	8.77783	0.978601	0.985327	1.00845	0.990792	1.03428	1.08642	1.06978	1.06349	0.931639	0.0151478
Ciclev10023881m	pacid=20806371 transcript=Ciclev10023881m locus=Ciclev10023881m.g ID=Ciclev10023881m.v1.0 annot-version=v1.0	2.1	1	1	4	429	48.9315	5.89697	0.924297	0.923522	0.987645	0.945155	1.04105	1.02435	1.06237	1.04259	0.906545	0.0151936
Ciclev10028055m	pacid=20812417 transcript=Ciclev10028055m locus=Ciclev10028055m.g ID=Ciclev10028055m.v1.0 annot-version=v1.0	54	22	25	333	600	63.1055	6.7124	1.00073	1.0174	0.984765	1.00097	1.07245	1.09538	1.15431	1.10738	0.903908	0.0152081
Ciclev10000836m	pacid=20787486 transcript=Ciclev10000836m locus=Ciclev10000836m.g ID=Ciclev10000836m.v1.0 annot-version=v1.0	60.53	31	32	333	527	57.1597	5.71924	0.975645	0.962312	1.00247	0.980142	1.03631	1.02424	1.02947	1.03001	0.951588	0.0154871
Ciclev10006273m	pacid=20790606 transcript=Ciclev10006273m locus=Ciclev10006222m.g ID=Ciclev10006273m.v1.0 annot-version=v1.0	60	4	9	76	110	12.3832	11.312	1.04096	1.0729	1.1062	1.07335	0.975398	0.999126	0.999401	0.991309	1.08276	0.0159577
Ciclev10017167m	pacid=20817475 transcript=Ciclev10017167m locus=Ciclev10017167m.g ID=Ciclev10017167m.v1.0 annot-version=v1.0	35.66	5	5	22	129	14.9157	6.21436	1.11905	1.21159	1.15075	1.16046	1.0095	0.983601	1.06148	1.01819	1.13973	0.0160533
Ciclev10019443m	pacid=20807620 transcript=Ciclev10019443m locus=Ciclev10019405m.g ID=Ciclev10019443m.v1.0 annot-version=v1.0	32.71	13	13	46	584	60.5181	5.93506	0.992642	0.974466	1.0164	0.994503	1.05093	1.12186	1.09967	1.09082	0.9117	0.0164289
Ciclev10018691m	pacid=20808025 transcript=Ciclev10018691m locus=Ciclev10018691m.g ID=Ciclev10018691m.v1.0 annot-version=v1.0	21.65	18	18	65	993	111.298	5.38916	1.05354	1.01927	1.09684	1.05655	0.964072	0.867866	0.857982	0.89664	1.17834	0.0169828
Ciclev10017147m	pacid=20815238 transcript=Ciclev10017147m locus=Ciclev10017148m.g ID=Ciclev10017147m.v1.0 annot-version=v1.0	30.83	4	4	42	133	15.6786	10.5063	1.0751	0.9973	1.04722	1.03987	0.895195	0.943555	0.947465	0.928738	1.11966	0.0171312
Ciclev10007757m	pacid=20794175 transcript=Ciclev10007757m locus=Ciclev10007700m.g ID=Ciclev10007757m.v1.0 annot-version=v1.0	38.23	25	25	203	620	70.3965	6.21436	0.928311	0.945614	0.938494	0.937473	0.985917	1.04585	1.06345	1.03174	0.908634	0.0171327
Ciclev10000034m	pacid=20788479 transcript=Ciclev10000034m locus=Ciclev10000034m.g ID=Ciclev10000034m.v1.0 annot-version=v1.0	22.98	24	25	91	1384	153.81	5.30029	0.922425	0.828765	0.905376	0.885522	0.994669	1.05627	1.00923	1.02006	0.868109	0.0171806
Ciclev10015084m	pacid=20817132 transcript=Ciclev10015084m locus=Ciclev10015084m.g ID=Ciclev10015084m.v1.0 annot-version=v1.0	8.11	1	3	10	481	50.3952	8.90967	1.03123	1.04705		1.03914	0.954732	0.968168		0.96145	1.08081	0.0173856
Ciclev10020330m	pacid=20807357 transcript=Ciclev10020330m locus=Ciclev10020330m.g ID=Ciclev10020330m.v1.0 annot-version=v1.0	16.99	4	6	29	418	46.9052	7.07861	0.818994	0.762868	0.845125	0.808996	0.930359	0.950145	0.892702	0.924402	0.875156	0.017444
Ciclev10019924m	pacid=20809139 transcript=Ciclev10019924m locus=Ciclev10019924m.g ID=Ciclev10019924m.v1.0 annot-version=v1.0	40.99	15	15	115	483	52.258	6.771	1.00604	0.970526	1.01569	0.99742	1.07722	1.07872	1.14555	1.1005	0.906337	0.0174458
Ciclev10030488m	pacid=20805206 transcript=Ciclev10030488m locus=Ciclev10030488m.g ID=Ciclev10030488m.v1.0 annot-version=v1.0	58.14	80	82	760	1701	192.756	5.42725	0.91896	0.937934	0.856446	0.904446	0.992959	1.05326	1.01926	1.02183	0.885127	0.0176946
Ciclev10007347m	pacid=20794969 transcript=Ciclev10007347m locus=Ciclev10007347m.g ID=Ciclev10007347m.v1.0 annot-version=v1.0	23.22	15	19	80	982	110.058	7.2251	0.917719	0.92847	0.934948	0.927045	0.966868	1.02527	0.993513	0.995217	0.931501	0.0179833
Ciclev10015345m	pacid=20818388 transcript=Ciclev10015345m locus=Ciclev10015345m.g ID=Ciclev10015345m.v1.0 annot-version=v1.0	23.58	8	8	34	424	48.5659	6.91748	1.01593	1.08412	1.0282	1.04275	0.963653	0.880917	0.878243	0.907604	1.1489	0.0181599
Ciclev10022969m	pacid=20806908 transcript=Ciclev10022969m locus=Ciclev10022969m.g ID=Ciclev10022969m.v1.0 annot-version=v1.0	16.67	2	2	13	108	12.2211	9.45166	0.93592	0.90371	0.911743	0.917124	1.01906	0.970772	1.04965	1.01316	0.905213	0.018236
Ciclev10026667m	pacid=20802109 transcript=Ciclev10026667m locus=Ciclev10026667m.g ID=Ciclev10026667m.v1.0 annot-version=v1.0	8.75	2	2	3	160	18.2547	10.6528	1.12885		1.10707	1.11796	0.94583		0.982002	0.963916	1.15981	0.0182661
Ciclev10005394m	pacid=20789886 transcript=Ciclev10005394m locus=Ciclev10005394m.g ID=Ciclev10005394m.v1.0 annot-version=v1.0	57.83	16	17	421	332	35.5173	6.53662	0.959869	0.979173	0.91354	0.95086	1.02707	1.10626	1.11952	1.08428	0.876948	0.0185852
Ciclev10011319m	pacid=20799235 transcript=Ciclev10011319m locus=Ciclev10011319m.g ID=Ciclev10011319m.v1.0 annot-version=v1.0	42.08	17	17	88	606	66.5591	6.80029	0.971056	0.932381	0.940043	0.947827	0.99568	1.03764	1.05581	1.02971	0.920479	0.0186007
Ciclev10011657m	pacid=20797771 transcript=Ciclev10011657m locus=Ciclev10011657m.g ID=Ciclev10011657m.v1.0 annot-version=v1.0	62.47	24	25	282	469	51.526	5.93506	1.03653	0.996792	1.01727	1.01687	1.05536	1.07792	1.08659	1.07329	0.947428	0.0187944
Ciclev10020665m	pacid=20808308 transcript=Ciclev10020665m locus=Ciclev10020633m.g ID=Ciclev10020665m.v1.0 annot-version=v1.0	19.62	4	6	19	372	42.3426	6.97607	0.993599	0.931695	0.951238	0.958844	1.03496	1.08986	1.04031	1.05505	0.908818	0.0190223
Ciclev10005691m	pacid=20792348 transcript=Ciclev10005691m locus=Ciclev10005564m.g ID=Ciclev10005691m.v1.0 annot-version=v1.0	17.65	7	7	50	255	28.6465	8.5874	1.06941	0.992926	0.947357	1.00323	1.12245	1.16484	1.15337	1.14689	0.87474	0.0190795
Ciclev10018813m	pacid=20812019 transcript=Ciclev10018813m locus=Ciclev10018788m.g ID=Ciclev10018813m.v1.0 annot-version=v1.0	16.61	11	11	31	873	95.9399	5.49072	1.04211	1.04136	1.01841	1.03396	0.924428	0.943355	0.991306	0.95303	1.08492	0.0193135
Ciclev10003449m	pacid=20785808 transcript=Ciclev10003449m locus=Ciclev10003449m.g ID=Ciclev10003449m.v1.0 annot-version=v1.0	34.19	8	8	61	234	25.8723	8.86572	1.03951	1.09781	0.983202	1.04017	0.928841	0.865512	0.896949	0.8971	1.15949	0.0193524
Ciclev10032613m	pacid=20805838 transcript=Ciclev10032613m locus=Ciclev10032613m.g ID=Ciclev10032613m.v1.0 annot-version=v1.0	20.59	5	5	13	238	25.427	5.09717	0.974622	0.997816	1.001	0.991147	1.12054	1.08569	1.21594	1.14072	0.868877	0.0198183
Ciclev10008300m	pacid=20793750 transcript=Ciclev10008300m locus=Ciclev10008249m.g ID=Ciclev10008300m.v1.0 annot-version=v1.0	37.61	19	20	81	444	50.2792	9.40771	0.930636	0.954667	0.953667	0.946323	0.991368	1.06386	1.0382	1.03114	0.917744	0.0199704
Ciclev10006178m	pacid=20790324 transcript=Ciclev10006178m locus=Ciclev10006145m.g ID=Ciclev10006178m.v1.0 annot-version=v1.0	63.57	11	11	199	140	15.974	10.5356	0.98877	0.978604	1.01437	0.993914	0.943866	0.86797	0.883139	0.898325	1.10641	0.0200028
Ciclev10028000m	pacid=20812320 transcript=Ciclev10028000m locus=Ciclev10028000m.g ID=Ciclev10028000m.v1.0 annot-version=v1.0	1.4	1	1	3	643	71.3675	8.06006	1.09741	1.01918	1.0366	1.05107	0.838785	0.933607	0.935423	0.902605	1.16448	0.020227
Ciclev10019346m	pacid=20806605 transcript=Ciclev10019346m locus=Ciclev10019346m.g ID=Ciclev10019346m.v1.0 annot-version=v1.0	46.32	20	20	137	611	67.1025	7.7085	0.968118	1.05567	0.950509	0.991433	1.10108	1.17357	1.13284	1.13583	0.87287	0.0202737
Ciclev10026352m	pacid=20800477 transcript=Ciclev10026352m locus=Ciclev10026352m.g ID=Ciclev10026352m.v1.0 annot-version=v1.0	63.82	10	15	148	246	27.372	6.43018	1.05193	1.08956	1.05177	1.06442	0.978375	0.962658	0.878649	0.939894	1.13249	0.0203468
Ciclev10018817m	pacid=20808436 transcript=Ciclev10018817m locus=Ciclev10018817m.g ID=Ciclev10018817m.v1.0 annot-version=v1.0	6.31	4	5	8	871	98.0499	5.73193	1.23799	1.22792		1.23295	1.34837	1.32065		1.33451	0.923902	0.0204451
Ciclev10030725m	pacid=20803778 transcript=Ciclev10030725m locus=Ciclev10030725m.g ID=Ciclev10030725m.v1.0 annot-version=v1.0	13.12	9	9	23	808	90.0281	6.39209	1.02553	1.10186	1.1183	1.0819	0.913086	0.910963	0.990438	0.938163	1.15321	0.0206387
Ciclev10002825m	pacid=20785887 transcript=Ciclev10002825m locus=Ciclev10002735m.g ID=Ciclev10002825m.v1.0 annot-version=v1.0	40.15	4	5	54	132	14.7077	10.9165	0.966277	1.00918	1.06871	1.01472	0.919841	0.839953	0.837017	0.865604	1.17227	0.0207077
Ciclev10001338m	pacid=20787450 transcript=Ciclev10001338m locus=Ciclev10001338m.g ID=Ciclev10001338m.v1.0 annot-version=v1.0	28.43	11	11	24	408	46.7919	6.13818	1.00643	1.00394	1.07489	1.02842	0.946171	0.845113	0.864549	0.885278	1.16169	0.0208842
Ciclev10021378m	pacid=20806784 transcript=Ciclev10021378m locus=Ciclev10021378m.g ID=Ciclev10021378m.v1.0 annot-version=v1.0	41.14	10	10	34	299	31.766	7.78174	1.02151	0.987446	1.01427	1.00774	0.973207	0.938906	0.951338	0.954483	1.0558	0.0209455
Ciclev10012408m	pacid=20797352 transcript=Ciclev10012408m locus=Ciclev10012408m.g ID=Ciclev10012408m.v1.0 annot-version=v1.0	13.83	3	3	5	282	30.2785	7.69385	0.964241	0.998145		0.981193	0.853348	0.865219		0.859284	1.14187	0.0210242
Ciclev10022793m	pacid=20811422 transcript=Ciclev10022793m locus=Ciclev10022793m.g ID=Ciclev10022793m.v1.0 annot-version=v1.0	11.68	2	2	5	137	14.0123	9.5542		0.95855	0.954756	0.956653		0.910945	0.895681	0.903313	1.05905	0.0210522
Ciclev10018541m	pacid=20809471 transcript=Ciclev10018541m locus=Ciclev10018541m.g ID=Ciclev10018541m.v1.0 annot-version=v1.0	1.75	2	2	3	1254	141.209	7.02002	0.992947		0.991901	0.992424	0.929791	0.930513	0.890483	0.916929	1.08233	0.0214905
Ciclev10014407m	pacid=20815065 transcript=Ciclev10014407m locus=Ciclev10014407m.g ID=Ciclev10014407m.v1.0 annot-version=v1.0	20.8	13	13	50	726	81.6245	9.0415	1.00553	1.05739	1.05267	1.03853	1.11523	1.09839	1.09555	1.10306	0.941498	0.0216898
Ciclev10029226m	pacid=20813808 transcript=Ciclev10029226m locus=Ciclev10029226m.g ID=Ciclev10029226m.v1.0 annot-version=v1.0	28.76	7	7	25	226	26.0889	5.92236	1.01853	0.99272	0.98216	0.997802	0.962635	0.931317	0.944891	0.946281	1.05445	0.0217073
Ciclev10015922m	pacid=20817932 transcript=Ciclev10015922m locus=Ciclev10015923m.g ID=Ciclev10015922m.v1.0 annot-version=v1.0	42.15	10	10	48	325	35.6305	6.80029	0.960329	0.971987	1.07004	1.00078	1.12886	1.17184	1.12001	1.14024	0.877699	0.0219362
Ciclev10020174m	pacid=20806717 transcript=Ciclev10020174m locus=Ciclev10020174m.g ID=Ciclev10020174m.v1.0 annot-version=v1.0	16.33	5	5	13	441	49.1474	9.14404	1.04363	1.15766	1.09439	1.09856	0.989509	0.905188	0.953454	0.949384	1.15713	0.022074
Ciclev10004122m	pacid=20790730 transcript=Ciclev10004122m locus=Ciclev10004122m.g ID=Ciclev10004122m.v1.0 annot-version=v1.0	10.77	21	22	47	2155	241.033	7.23975	0.922247	0.91851	0.907747	0.916168	0.988336	1.01514	0.951458	0.984977	0.930141	0.0221909
Ciclev10024934m	pacid=20802007 transcript=Ciclev10024934m locus=Ciclev10024934m.g ID=Ciclev10024934m.v1.0 annot-version=v1.0	29.82	17	17	75	778	82.3588	8.66064	1.00653	0.999537	0.941485	0.982516	1.0606	1.13276	1.07804	1.09047	0.901004	0.0226864
Ciclev10029102m	pacid=20813560 transcript=Ciclev10029102m locus=Ciclev10029102m.g ID=Ciclev10029102m.v1.0 annot-version=v1.0	13.23	2	4	14	257	29.776	10.9458	1.09227	1.17513	1.19122	1.15287	1.00133	1.04026	1.04967	1.03042	1.11884	0.0228091
Ciclev10008149m	pacid=20793255 transcript=Ciclev10008149m locus=Ciclev10008149m.g ID=Ciclev10008149m.v1.0 annot-version=v1.0	16.7	6	6	17	479	53.2641	8.1333	0.997919	0.97668	0.996373	0.990324	1.06686	1.02243	1.07727	1.05552	0.938235	0.0229271
Ciclev10020218m	pacid=20809584 transcript=Ciclev10020218m locus=Ciclev10020218m.g ID=Ciclev10020218m.v1.0 annot-version=v1.0	36.03	14	14	90	433	46.4819	6.13818	0.955856	0.974061	0.905798	0.945238	1.00997	1.02863	1.02532	1.02131	0.92552	0.02301
Ciclev10017030m	pacid=20818367 transcript=Ciclev10017030m locus=Ciclev10017030m.g ID=Ciclev10017030m.v1.0 annot-version=v1.0	38.61	6	6	53	158	17.3891	7.50342	1.00679	0.992613	1.08846	1.02929	0.92629	0.915863	0.922838	0.921663	1.11677	0.0230739
Ciclev10012128m	pacid=20797511 transcript=Ciclev10012128m locus=Ciclev10012128m.g ID=Ciclev10012128m.v1.0 annot-version=v1.0	36.66	9	10	96	341	37.6159	5.2749	1.09086	0.995345	1.05087	1.04569	1.18051	1.2006	1.12986	1.17032	0.893508	0.0231047
Ciclev10019027m	pacid=20806957 transcript=Ciclev10019027m locus=Ciclev10019027m.g ID=Ciclev10019027m.v1.0 annot-version=v1.0	20.08	13	13	30	732	81.9959	4.90674	1.09976	1.06739	1.00767	1.05827	0.977585	0.921557	0.931714	0.943618	1.1215	0.0231216
Ciclev10007537m	pacid=20793830 transcript=Ciclev10007537m locus=Ciclev10007535m.g ID=Ciclev10007537m.v1.0 annot-version=v1.0	21.49	12	12	57	763	84.8996	5.90967	0.9066	0.831389	0.858394	0.865461	0.943011	1.02628	1.05191	1.00707	0.859386	0.023164
Ciclev10019770m	pacid=20810479 transcript=Ciclev10019770m locus=Ciclev10019770m.g ID=Ciclev10019770m.v1.0 annot-version=v1.0	14.71	5	5	25	510	55.6725	6.7417	1.06493	1.09009	1.21456	1.12319	1.2754	1.29893	1.29904	1.29112	0.869938	0.0231884
Ciclev10008413m	pacid=20794360 transcript=Ciclev10008413m locus=Ciclev10008413m.g ID=Ciclev10008413m.v1.0 annot-version=v1.0	15.2	4	4	16	421	47.5072	5.07178	1.02593	1.05087	1.01473	1.03051	0.976166	0.94443	0.895965	0.938854	1.09763	0.0232995
Ciclev10022870m	pacid=20811532 transcript=Ciclev10022870m locus=Ciclev10022870m.g ID=Ciclev10022870m.v1.0 annot-version=v1.0	64	7	8	115	125	14.0414	9.5542	0.944987	0.971387	1.0138	0.976724	0.829025	0.823206	0.910034	0.854088	1.14359	0.0235955
Ciclev10014421m	pacid=20817201 transcript=Ciclev10014421m locus=Ciclev10014421m.g ID=Ciclev10014421m.v1.0 annot-version=v1.0	21.73	11	12	64	718	78.0911	7.82568	0.930209	0.81908	0.808998	0.852762	0.983387	1.01534	0.986166	0.994965	0.857078	0.0239841
Ciclev10021047m	pacid=20810226 transcript=Ciclev10021047m locus=Ciclev10021047m.g ID=Ciclev10021047m.v1.0 annot-version=v1.0	25.97	8	8	19	335	36.7188	9.26123	0.834684	0.773854	0.827094	0.811877	1.01733	0.999762	0.889514	0.968868	0.837964	0.0240037
Ciclev10031119m	pacid=20803963 transcript=Ciclev10031119m locus=Ciclev10031088m.g ID=Ciclev10031119m.v1.0 annot-version=v1.0	42.4	28	28	255	559	62.4188	5.30029	0.942987	0.863341	0.911767	0.906032	0.978666	1.00943	1.04036	1.00949	0.897519	0.0240125
Ciclev10027678m	pacid=20814024 transcript=Ciclev10027678m locus=Ciclev10027678m.g ID=Ciclev10027678m.v1.0 annot-version=v1.0	2.68	4	4	7	1607	179.534	6.39209	0.972497	1.0626	1.0179	1.01766	0.939766	0.90757	0.89356	0.913632	1.11387	0.0240143
Ciclev10031185m	pacid=20805686 transcript=Ciclev10031185m locus=Ciclev10031185m.g ID=Ciclev10031185m.v1.0 annot-version=v1.0	50.19	28	28	318	538	60.9867	4.88135	0.966614	0.989739	0.949414	0.968589	1.0026	1.03093	1.02677	1.0201	0.949506	0.0245184
Ciclev10032740m	pacid=20804348 transcript=Ciclev10032740m locus=Ciclev10032739m.g ID=Ciclev10032740m.v1.0 annot-version=v1.0	13.27	3	3	19	211	23.7835	7.88428	0.928561	0.872454	0.799517	0.866844	1.02064	0.988552	0.996242	1.00181	0.865278	0.0249518
Ciclev10031706m	pacid=20805337 transcript=Ciclev10031706m locus=Ciclev10031706m.g ID=Ciclev10031706m.v1.0 annot-version=v1.0	55.67	21	23	155	406	45.7206	6.58057	0.942817	0.963178	0.929608	0.945201	0.981697	0.977056	0.996786	0.98518	0.95942	0.0249954
Ciclev10011726m	pacid=20799173 transcript=Ciclev10011726m locus=Ciclev10011726m.g ID=Ciclev10011726m.v1.0 annot-version=v1.0	75.96	23	33	1013	445	47.7884	5.78271	0.985627	0.949864	0.939048	0.95818	1.02732	1.095	1.02787	1.05006	0.912496	0.0256821
Ciclev10012224m	pacid=20797584 transcript=Ciclev10012224m locus=Ciclev10012224m.g ID=Ciclev10012224m.v1.0 annot-version=v1.0	3.77	1	1	5	318	35.5033	6.02393	0.874885	0.896546	0.885855	0.885762	0.931113	0.949789	0.910635	0.930512	0.951908	0.0257364
Ciclev10025299m	pacid=20801639 transcript=Ciclev10025299m locus=Ciclev10025301m.g ID=Ciclev10025299m.v1.0 annot-version=v1.0	58.35	7	30	245	557	60.6617	6.12549	1.07178	0.964771	1.02233	1.01963	1.11422	1.14146	1.13374	1.12981	0.90248	0.0261302
Ciclev10000775m	pacid=20785483 transcript=Ciclev10000775m locus=Ciclev10000775m.g ID=Ciclev10000775m.v1.0 annot-version=v1.0	14.52	5	6	13	544	60.9314	6.90283		1.02152	1.00099	1.01125		1.08515	1.07526	1.0802	0.936169	0.0262432
Ciclev10002426m	pacid=20788428 transcript=Ciclev10002426m locus=Ciclev10002220m.g ID=Ciclev10002426m.v1.0 annot-version=v1.0	4.57	1	1	3	219	24.999	8.60205	1.0571	1.03724	1.05823	1.05086	1.01981	1.00744	0.977181	1.00148	1.04931	0.0264356
Ciclev10012445m	pacid=20797442 transcript=Ciclev10012445m locus=Ciclev10012445m.g ID=Ciclev10012445m.v1.0 annot-version=v1.0	48.18	12	14	315	274	29.2743	8.45557	0.890104	0.828298	0.940282	0.886228	0.980794	1.01386	1.01705	1.0039	0.882785	0.026754
Ciclev10029115m	pacid=20812741 transcript=Ciclev10029115m locus=Ciclev10029115m.g ID=Ciclev10029115m.v1.0 annot-version=v1.0	51.38	6	10	222	253	27.2232	5.99854	1.00976	1.02842	1.0068	1.01499	0.970505	0.931448	0.887072	0.929675	1.09177	0.0270765
Ciclev10019136m	pacid=20811278 transcript=Ciclev10019136m locus=Ciclev10019136m.g ID=Ciclev10019136m.v1.0 annot-version=v1.0	12.41	6	6	21	685	78.5298	5.38916	1.23437	1.09509	1.07976	1.13641	0.938001	0.959216	0.988452	0.96189	1.18143	0.0272456
Ciclev10008909m	pacid=20793413 transcript=Ciclev10008909m locus=Ciclev10008909m.g ID=Ciclev10008909m.v1.0 annot-version=v1.0	73.09	21	21	507	327	36.0773	7.72314	0.914579	0.953066	0.95209	0.939912	0.975778	1.01906	1.01597	1.0036	0.936537	0.0277613
Ciclev10007793m	pacid=20794469 transcript=Ciclev10007793m locus=Ciclev10007793m.g ID=Ciclev10007793m.v1.0 annot-version=v1.0	8.64	5	5	22	602	67.4568	7.29834	1.06229	1.08193	1.07339	1.07253	1.10911	1.09392	1.09283	1.09862	0.976254	0.0280522
Ciclev10022481m	pacid=20811565 transcript=Ciclev10022481m locus=Ciclev10022481m.g ID=Ciclev10022481m.v1.0 annot-version=v1.0	40.33	3	8	105	181	19.838	9.67139	0.928146	0.90863	0.981195	0.939324	1.01052	1.01726	1.06077	1.02952	0.91239	0.0281489
Ciclev10016090m	pacid=20818461 transcript=Ciclev10016090m locus=Ciclev10016090m.g ID=Ciclev10016090m.v1.0 annot-version=v1.0	26	8	8	21	300	32.3404	6.04932	1.00961	1.02891	1.13613	1.05822	0.921927	0.888866	0.93947	0.916754	1.15431	0.0282091
Ciclev10015027m	pacid=20817488 transcript=Ciclev10015027m locus=Ciclev10015028m.g ID=Ciclev10015027m.v1.0 annot-version=v1.0	4.06	2	2	2	493	53.0232	6.11279		0.973729	1.01663	0.995178		1.12064	1.11905	1.11984	0.888675	0.0283879
Ciclev10031373m	pacid=20805019 transcript=Ciclev10031373m locus=Ciclev10031373m.g ID=Ciclev10031373m.v1.0 annot-version=v1.0	52.89	9	23	216	484	53.4565	6.37939	0.982688	0.951117	1.00918	0.980996	1.03367	1.06872	1.1026	1.06833	0.918252	0.0284438
Ciclev10025223m	pacid=20800911 transcript=Ciclev10025223m locus=Ciclev10025221m.g ID=Ciclev10025223m.v1.0 annot-version=v1.0	19.26	7	8	30	592	66.2718	8.55811	1.09293	1.17284	1.16395	1.14324	1.01564	1.02589	1.0749	1.03881	1.10053	0.0286527
Ciclev10028803m	pacid=20812924 transcript=Ciclev10028803m locus=Ciclev10028803m.g ID=Ciclev10028803m.v1.0 annot-version=v1.0	15.18	5	5	9	336	39.5404	6.49365	1.14	1.16212	1.29246	1.19819	0.998552	1.04334	1.04912	1.03034	1.16292	0.0286934
Ciclev10016981m	pacid=20815969 transcript=Ciclev10016981m locus=Ciclev10016904m.g ID=Ciclev10016981m.v1.0 annot-version=v1.0	23.21	4	4	14	168	18.0027	10.814	0.915051	0.988827	0.9304	0.944759	0.879297	0.81066	0.785838	0.825265	1.14479	0.0290587
Ciclev10005370m	pacid=20792388 transcript=Ciclev10005370m locus=Ciclev10005370m.g ID=Ciclev10005370m.v1.0 annot-version=v1.0	8.58	3	3	21	338	37.3029	8.67529	0.965404	0.911276	0.876966	0.917882	1.02245	1.04659	1.14878	1.07261	0.855747	0.0291679
Ciclev10004815m	pacid=20789865 transcript=Ciclev10004815m locus=Ciclev10004815m.g ID=Ciclev10004815m.v1.0 annot-version=v1.0	43.29	17	17	91	499	54.4497	6.53662	0.919682	0.865237	0.852255	0.879058	0.957391	1.09695	1.03366	1.02933	0.854008	0.0295018
Ciclev10026267m	pacid=20802167 transcript=Ciclev10026267m locus=Ciclev10026267m.g ID=Ciclev10026267m.v1.0 annot-version=v1.0	57.56	6	11	84	271	29.6141	6.53662	1.06428	1.01755	1.03124	1.03769	0.946975	0.81039	0.919078	0.892148	1.16314	0.0295356
Ciclev10006644m	pacid=20791428 transcript=Ciclev10006644m locus=Ciclev10006644m.g ID=Ciclev10006644m.v1.0 annot-version=v1.0	16.42	6	6	13	408	44.6183	5.64307	0.9119	1.03109	0.900444	0.947811	0.809546	0.806936	0.812362	0.809615	1.17069	0.0297608
Ciclev10000603m	pacid=20788216 transcript=Ciclev10000603m locus=Ciclev10000603m.g ID=Ciclev10000603m.v1.0 annot-version=v1.0	53.96	31	31	202	619	67.8277	5.42725	0.947721	0.93544	0.933859	0.939007	0.972026	0.957004	0.989042	0.972691	0.96537	0.0302208
Ciclev10020674m	pacid=20809201 transcript=Ciclev10020674m locus=Ciclev10020642m.g ID=Ciclev10020674m.v1.0 annot-version=v1.0	25.61	8	8	37	371	39.6657	8.52881	1.1508		1.17294	1.16187	0.985944	0.946677	1.0572	0.996606	1.16583	0.0302708
Ciclev10032757m	pacid=20805083 transcript=Ciclev10032757m locus=Ciclev10032757m.g ID=Ciclev10032757m.v1.0 annot-version=v1.0	68.27	2	13	96	208	23.1929	7.91357	0.967391	0.914011	0.895301	0.925568	0.998819	1.08663	1.13221	1.07255	0.862957	0.0302806
Ciclev10009161m	pacid=20792588 transcript=Ciclev10009161m locus=Ciclev10009155m.g ID=Ciclev10009161m.v1.0 annot-version=v1.0	40.51	13	13	35	274	30.465	4.729	1.07946	1.10204	1.14327	1.10826	0.946284	1.02471	0.866092	0.945694	1.1719	0.0302927
Ciclev10009428m	pacid=20792884 transcript=Ciclev10009428m locus=Ciclev10009428m.g ID=Ciclev10009428m.v1.0 annot-version=v1.0	36.82	6	7	63	220	25.008	9.12939	1.04723	1.05753	1.09156	1.06544	1.01706	0.994215	0.949215	0.986831	1.07966	0.0306849
Ciclev10015508m	pacid=20817114 transcript=Ciclev10015508m locus=Ciclev10015508m.g ID=Ciclev10015508m.v1.0 annot-version=v1.0	30.56	11	11	92	396	42.9609	8.55811	1.46643	1.55101	1.56926	1.5289	1.18278	1.30912	1.40106	1.29765	1.1782	0.0308459
Ciclev10007989m	pacid=20795350 transcript=Ciclev10007989m locus=Ciclev10007989m.g ID=Ciclev10007989m.v1.0 annot-version=v1.0	37.45	17	17	122	526	61.7388	6.07471	0.996015	0.943444	0.905403	0.948287	1.08523	1.04848	1.02313	1.05228	0.901172	0.0309572
Ciclev10032471m	pacid=20804478 transcript=Ciclev10032471m locus=Ciclev10032471m.g ID=Ciclev10032471m.v1.0 annot-version=v1.0	55.73	14	14	209	262	29.4469	5.61768	0.917601	0.967311	0.967668	0.95086	0.801178	0.885399	0.867456	0.851344	1.11689	0.0311164
Ciclev10016704m	pacid=20818544 transcript=Ciclev10016704m locus=Ciclev10016113m.g ID=Ciclev10016704m.v1.0 annot-version=v1.0	24.04	3	4	32	208	23.039	5.14795	0.771455	0.836801	0.908011	0.838756	1.0492	1.01673	0.942772	1.0029	0.83633	0.0312959
Ciclev10008100m	pacid=20794411 transcript=Ciclev10008100m locus=Ciclev10008100m.g ID=Ciclev10008100m.v1.0 annot-version=v1.0	23.89	5	12	43	494	53.0645	7.15186	1.19951	1.16769	1.11878	1.16199	0.95009	0.92213	1.08265	0.984958	1.17974	0.0319476
Ciclev10014793m	pacid=20817038 transcript=Ciclev10014793m locus=Ciclev10014791m.g ID=Ciclev10014793m.v1.0 annot-version=v1.0	7.96	4	4	7	553	60.4073	6.60986		0.918768	0.909194	0.913981		0.961973	0.980703	0.971338	0.940951	0.0320196
Ciclev10005132m	pacid=20790577 transcript=Ciclev10005132m locus=Ciclev10005079m.g ID=Ciclev10005132m.v1.0 annot-version=v1.0	8.7	3	3	8	391	44.4218	8.89502		0.998024	0.98948	0.993752		1.10963	1.07451	1.09207	0.909972	0.0321603
Ciclev10027807m	pacid=20814096 transcript=Ciclev10027807m locus=Ciclev10027807m.g ID=Ciclev10027807m.v1.0 annot-version=v1.0	23.52	18	19	62	846	94.08	6.55127	0.883254	0.920293	0.898951	0.900833	0.961978	1.10964	1.06305	1.04489	0.862134	0.0326047
Ciclev10009920m	pacid=20793092 transcript=Ciclev10009920m locus=Ciclev10009887m.g ID=Ciclev10009920m.v1.0 annot-version=v1.0	56.56	6	6	56	122	14.4706	9.36377	1.05061	1.16443	1.0893	1.10144	1.01393	0.953157	0.97229	0.979792	1.12416	0.032661
Ciclev10004249m	pacid=20792553 transcript=Ciclev10004249m locus=Ciclev10004249m.g ID=Ciclev10004249m.v1.0 annot-version=v1.0	31.16	22	22	63	966	104.869	4.88135	0.914939	0.930886	0.890584	0.912136	0.98179	0.96805	1.04725	0.99903	0.913022	0.0326959
Ciclev10014209m	pacid=20815705 transcript=Ciclev10014209m locus=Ciclev10014209m.g ID=Ciclev10014209m.v1.0 annot-version=v1.0	27.58	24	30	166	892	102.811	6.21436	1.1985	1.20882	1.30844	1.23858	1.15096	1.06435	1.06265	1.09266	1.13355	0.0328861
Ciclev10023388m	pacid=20810534 transcript=Ciclev10023388m locus=Ciclev10023388m.g ID=Ciclev10023388m.v1.0 annot-version=v1.0	48.39	10	10	128	310	34.0492	7.00537	1.18761	1.05628	1.05279	1.0989	0.944053	0.970363	0.870191	0.928202	1.1839	0.0332922
Ciclev10030724m	pacid=20803094 transcript=Ciclev10030724m locus=Ciclev10030724m.g ID=Ciclev10030724m.v1.0 annot-version=v1.0	5.43	4	4	8	811	92.5653	6.58057	1.01671	1.08551	0.988678	1.0303	1.11003	1.12971	1.16528	1.13501	0.907748	0.0337563
Ciclev10028098m	pacid=20814718 transcript=Ciclev10028098m locus=Ciclev10028098m.g ID=Ciclev10028098m.v1.0 annot-version=v1.0	15.59	9	9	37	571	63.6161	8.80713	0.939301	0.907901	0.931276	0.926159	0.998425	0.972343	1.05413	1.0083	0.918537	0.0337871
Ciclev10026028m	pacid=20800548 transcript=Ciclev10026028m locus=Ciclev10026028m.g ID=Ciclev10026028m.v1.0 annot-version=v1.0	16.42	5	5	11	335	37.7855	6.03662	1.1632	1.28309	1.3726	1.27296	1.48702	1.56499	1.44	1.49734	0.850153	0.0338421
Ciclev10031715m	pacid=20804810 transcript=Ciclev10031715m locus=Ciclev10031677m.g ID=Ciclev10031715m.v1.0 annot-version=v1.0	3.47	2	2	5	404	45.9413	5.97314	0.884923	0.968946	0.854345	0.902738	1.01314	1.04204	0.999786	1.01832	0.886495	0.0338514
Ciclev10004277m	pacid=20790060 transcript=Ciclev10004277m locus=Ciclev10004277m.g ID=Ciclev10004277m.v1.0 annot-version=v1.0	5.62	4	4	9	890	98.1674	6.78564	1.12185	1.18169	1.04431	1.11595	0.920928	0.922833	1.01826	0.954008	1.16975	0.0339387
Ciclev10025415m	pacid=20800896 transcript=Ciclev10025415m locus=Ciclev10025415m.g ID=Ciclev10025415m.v1.0 annot-version=v1.0	10.67	5	5	11	506	56.2969	5.64307	1.04092	1.17204	1.07256	1.09517	0.869771	0.905467	0.99483	0.923356	1.18608	0.033967
Ciclev10002687m	pacid=20786274 transcript=Ciclev10002687m locus=Ciclev10002687m.g ID=Ciclev10002687m.v1.0 annot-version=v1.0	5.88	1	1	3	170	18.2681	8.92432	1.09352	0.992337	1.00128	1.02904	0.943423	0.897955	0.913579	0.918319	1.12057	0.0340146
Ciclev10019619m	pacid=20806675 transcript=Ciclev10019619m locus=Ciclev10019619m.g ID=Ciclev10019619m.v1.0 annot-version=v1.0	50.83	19	19	102	541	58.8129	4.729	0.91938	0.915817	0.955805	0.930334	1.01821	0.966092	0.994137	0.992812	0.93707	0.0340677
Ciclev10031039m	pacid=20805457 transcript=Ciclev10031039m locus=Ciclev10031039m.g ID=Ciclev10031039m.v1.0 annot-version=v1.0	37.18	20	23	125	589	66.6346	6.50732	1.01678	1.01014	1.01628	1.0144	1.06208	1.14888	1.08179	1.09759	0.924208	0.0343114
Ciclev10010950m	pacid=20798547 transcript=Ciclev10010950m locus=Ciclev10010950m.g ID=Ciclev10010950m.v1.0 annot-version=v1.0	45.84	28	40	287	1093	121.452	5.26221	0.849577	0.899117	0.813309	0.854001	0.953807	0.916169	0.95734	0.942438	0.906161	0.0347673
Ciclev10001836m	pacid=20787621 transcript=Ciclev10001836m locus=Ciclev10001813m.g ID=Ciclev10001836m.v1.0 annot-version=v1.0	33.33	10	10	56	324	35.2992	8.1626	0.886419	0.894534	0.956528	0.912494	1.06146	1.00718	0.978572	1.01574	0.898356	0.0348479
Ciclev10004406m	pacid=20790564 transcript=Ciclev10004406m locus=Ciclev10004406m.g ID=Ciclev10004406m.v1.0 annot-version=v1.0	21.77	13	16	41	744	86.7393	7.2251	0.998045	1.00505	0.950409	0.984501	0.904605	0.933407	0.861555	0.899856	1.09407	0.0351258
Ciclev10015311m	pacid=20816696 transcript=Ciclev10015311m locus=Ciclev10015311m.g ID=Ciclev10015311m.v1.0 annot-version=v1.0	20.23	9	9	39	430	48.2917	5.65576	1.07014	1.00268	0.977812	1.01688	1.15501	1.1797	1.08563	1.14011	0.89191	0.0353064
Ciclev10029200m	pacid=20813372 transcript=Ciclev10029200m locus=Ciclev10029196m.g ID=Ciclev10029200m.v1.0 annot-version=v1.0	33.91	6	6	59	233	23.5721	7.18115	1.08417	1.14569	1.12285	1.11757	0.994454	1.05707	0.938371	0.996631	1.12135	0.0353498
Ciclev10011124m	pacid=20798323 transcript=Ciclev10011124m locus=Ciclev10011124m.g ID=Ciclev10011124m.v1.0 annot-version=v1.0	13.78	7	7	16	769	85.4671	6.3667	0.886173		0.849726	0.86795	1.00962		1.06382	1.03672	0.837207	0.0354671
Ciclev10021969m	pacid=20808934 transcript=Ciclev10021969m locus=Ciclev10021969m.g ID=Ciclev10021969m.v1.0 annot-version=v1.0	30.96	7	7	71	239	26.0745	9.23193	1.07179	1.20802	1.12008	1.1333	1.00037	1.02645	0.988545	1.00512	1.12753	0.0364112
Ciclev10015727m	pacid=20819186 transcript=Ciclev10015727m locus=Ciclev10015727m.g ID=Ciclev10015727m.v1.0 annot-version=v1.0	19.22	3	5	42	359	38.2702	5.51611	0.883241	0.939325	0.876753	0.899773	0.948922	0.985491	0.974361	0.969591	0.927992	0.0367029
Ciclev10001716m	pacid=20786863 transcript=Ciclev10001716m locus=Ciclev10001551m.g ID=Ciclev10001716m.v1.0 annot-version=v1.0	38.95	5	13	94	344	38.1577	5.64307	1.07124	1.13329	1.07029	1.09161	0.925199	1.02874	0.983287	0.979074	1.11494	0.0368154
Ciclev10031843m	pacid=20802975 transcript=Ciclev10031843m locus=Ciclev10031387m.g ID=Ciclev10031843m.v1.0 annot-version=v1.0	23.02	7	7	13	378	42.052	6.30322	1.0614	1.12589	1.05437	1.08055	0.986067	1.01392	1.01422	1.00474	1.07546	0.036856
Ciclev10014015m	pacid=20817770 transcript=Ciclev10014015m locus=Ciclev10014015m.g ID=Ciclev10014015m.v1.0 annot-version=v1.0	14.75	22	28	70	1946	225.184	9.14404	0.883058	0.872158	0.921742	0.89232	0.933353	1.01632	0.999245	0.982973	0.907777	0.0369225
Ciclev10001644m	pacid=20787695 transcript=Ciclev10001644m locus=Ciclev10001644m.g ID=Ciclev10001644m.v1.0 annot-version=v1.0	9.27	3	3	4	356	40.3667	8.89502	0.851799	0.83861		0.845205	0.957333	0.922298		0.939816	0.89933	0.0369823
Ciclev10009648m	pacid=20794018 transcript=Ciclev10009648m locus=Ciclev10009624m.g ID=Ciclev10009648m.v1.0 annot-version=v1.0	28.18	6	6	59	181	19.7142	9.45166	1.14057	1.13711	1.26614	1.18127	0.975906	0.978884	1.082	1.01226	1.16696	0.0370587
Ciclev10019079m	pacid=20807109 transcript=Ciclev10019079m locus=Ciclev10019079m.g ID=Ciclev10019079m.v1.0 annot-version=v1.0	11.74	8	8	24	707	70.7639	4.85596	1.11693	1.07705	1.07024	1.08807	1.00286	0.954221	1.04049	0.999189	1.08896	0.0371194
Ciclev10032180m	pacid=20805542 transcript=Ciclev10032180m locus=Ciclev10032170m.g ID=Ciclev10032180m.v1.0 annot-version=v1.0	18.97	7	7	39	311	35.5875	10.7407	1.02	0.985098	1.00045	1.00185	0.969166	0.975065	0.962141	0.968791	1.03412	0.0372897
Ciclev10008145m	pacid=20793840 transcript=Ciclev10008145m locus=Ciclev10008145m.g ID=Ciclev10008145m.v1.0 annot-version=v1.0	8.54	4	4	8	480	53.9537	7.82568	1.15801	1.16671	1.08084	1.13519	1.06165	1.02838	0.974666	1.02156	1.11122	0.0379911
Ciclev10000106m	pacid=20787293 transcript=Ciclev10000106m locus=Ciclev10000088m.g ID=Ciclev10000106m.v1.0 annot-version=v1.0	46.6	39	39	238	1088	122.998	6.07471	0.957168	0.899494	0.8535	0.903388	0.985012	1.01007	0.996127	0.997071	0.906041	0.0385387
Ciclev10031419m	pacid=20802757 transcript=Ciclev10031419m locus=Ciclev10031419m.g ID=Ciclev10031419m.v1.0 annot-version=v1.0	43.43	22	22	124	472	51.5918	6.44287	1.06332	1.07607	1.1106	1.08333	1.14723	1.15772	1.23909	1.18135	0.917029	0.038555
Ciclev10016474m	pacid=20815939 transcript=Ciclev10016474m locus=Ciclev10016474m.g ID=Ciclev10016474m.v1.0 annot-version=v1.0	19.58	3	4	8	240	26.9935	10.0229	1.03924	1.01955		1.0294	0.975993	0.981654		0.978823	1.05167	0.0386515
Ciclev10030937m	pacid=20802470 transcript=Ciclev10030937m locus=Ciclev10030937m.g ID=Ciclev10030937m.v1.0 annot-version=v1.0	12.99	8	8	20	639	74.0927	6.25244	1.03146	1.07217	1.08012	1.06125	1.01655	0.987019	1.01651	1.00669	1.0542	0.0387235
Ciclev10019951m	pacid=20810666 transcript=Ciclev10019951m locus=Ciclev10019638m.g ID=Ciclev10019951m.v1.0 annot-version=v1.0	53.35	19	20	154	478	52.5128	6.31592	0.741822	0.746425	0.72299	0.737079	0.766409	0.826541	0.790008	0.794319	0.927938	0.0388589
Ciclev10031533m	pacid=20803632 transcript=Ciclev10031533m locus=Ciclev10031531m.g ID=Ciclev10031533m.v1.0 annot-version=v1.0	31.99	14	14	65	447	50.8467	6.93213	1.12874	1.0821	1.11054	1.10713	1.06413	1.06655	1.03277	1.05449	1.04992	0.0389099
Ciclev10027090m	pacid=20800225 transcript=Ciclev10027090m locus=Ciclev10027090m.g ID=Ciclev10027090m.v1.0 annot-version=v1.0	9.36	8	9	15	1090	122.993	5.37646	0.863175		0.906315	0.884745	0.96357	0.958773	1.0095	0.97728	0.905314	0.0391371
Ciclev10027815m	pacid=20813502 transcript=Ciclev10027815m locus=Ciclev10027815m.g ID=Ciclev10027815m.v1.0 annot-version=v1.0	24.4	13	14	56	840	95.2316	7.35693		0.942378	0.929444	0.935911		0.893093	0.87666	0.884876	1.05767	0.0395066
Ciclev10027703m	pacid=20812199 transcript=Ciclev10027703m locus=Ciclev10027703m.g ID=Ciclev10027703m.v1.0 annot-version=v1.0	36.64	38	38	179	1190	130.005	5.52881	0.943782	0.997899	0.943176	0.961619	1.01978	1.03808	1.0996	1.05248	0.913666	0.0395922
Ciclev10002344m	pacid=20786978 transcript=Ciclev10002344m locus=Ciclev10002344m.g ID=Ciclev10002344m.v1.0 annot-version=v1.0	8.51	3	3	10	235	25.7568	9.11475	1.00304	0.986147	1.07464	1.02127	1.10846	1.10194	1.0985	1.10296	0.925936	0.0401653
Ciclev10032633m	pacid=20802779 transcript=Ciclev10032633m locus=Ciclev10032633m.g ID=Ciclev10032633m.v1.0 annot-version=v1.0	54.51	14	17	109	233	25.9492	10.0229	0.863353	0.954398	0.925467	0.914406	0.980262	1.03143	1.00681	1.00617	0.908801	0.0401975
Ciclev10002950m	pacid=20787467 transcript=Ciclev10002950m locus=Ciclev10002950m.g ID=Ciclev10002950m.v1.0 annot-version=v1.0	27.84	3	3	24	97	11.1619	4.88135	0.993608	1.15996	1.13101	1.09486	0.927119	0.964332	0.86761	0.919687	1.19047	0.0402313
Ciclev10016536m	pacid=20818769 transcript=Ciclev10016536m locus=Ciclev10016536m.g ID=Ciclev10016536m.v1.0 annot-version=v1.0	31.17	4	4	14	231	24.7638	8.03076		0.928616	0.968367	0.948491		0.851567	0.832489	0.842028	1.12644	0.0403059
Ciclev10030875m	pacid=20805145 transcript=Ciclev10030875m locus=Ciclev10030875m.g ID=Ciclev10030875m.v1.0 annot-version=v1.0	49.56	34	35	279	686	71.918	5.13525	0.940206	0.795451	0.90699	0.880882	1.01874	0.997063	1.08612	1.03397	0.851938	0.0406541
Ciclev10013148m	pacid=20798461 transcript=Ciclev10013148m locus=Ciclev10013125m.g ID=Ciclev10013148m.v1.0 annot-version=v1.0	42.61	5	5	74	115	12.1583	8.104	1.11943	1.09234	1.07392	1.09523	1.13515	1.14824	1.18869	1.15736	0.946315	0.0406907
Ciclev10019839m	pacid=20807608 transcript=Ciclev10019839m locus=Ciclev10019838m.g ID=Ciclev10019839m.v1.0 annot-version=v1.0	40.44	14	14	78	497	53.4985	8.104	0.935275	0.960087	0.990004	0.961789	1.00293	1.01397	1.01324	1.01005	0.952222	0.0409229
Ciclev10010890m	pacid=20798937 transcript=Ciclev10010890m locus=Ciclev10010890m.g ID=Ciclev10010890m.v1.0 annot-version=v1.0	35.83	42	62	284	2040	231.219	5.77002	0.95824	0.941192	0.915733	0.938388	0.975546	0.987931	0.970887	0.978121	0.959378	0.0409512
Ciclev10022116m	pacid=20810488 transcript=Ciclev10022116m locus=Ciclev10022116m.g ID=Ciclev10022116m.v1.0 annot-version=v1.0	17.41	5	5	17	224	24.657	9.05615	0.990022	1.05301	1.0137	1.01891	1.08512	1.21185	1.12906	1.14201	0.892211	0.0411399
Ciclev10005432m	pacid=20790140 transcript=Ciclev10005432m locus=Ciclev10005432m.g ID=Ciclev10005432m.v1.0 annot-version=v1.0	4.04	1	1	6	322	35.4679	7.34229		0.981636	0.969147	0.975391		1.13857	1.0832	1.11089	0.878028	0.041176
Ciclev10015528m	pacid=20818158 transcript=Ciclev10015528m locus=Ciclev10015528m.g ID=Ciclev10015528m.v1.0 annot-version=v1.0	31.04	12	13	40	393	43.429	5.46533	0.953245	0.910096	0.907341	0.923561	0.982511	0.978856	0.957988	0.973118	0.949073	0.0413264
Ciclev10000419m	pacid=20788081 transcript=Ciclev10000419m locus=Ciclev10000419m.g ID=Ciclev10000419m.v1.0 annot-version=v1.0	4.7	3	3	7	724	83.1205	5.5542	0.896295	1.01543	1.05119	0.987636	0.851007	0.861694	0.784439	0.83238	1.18652	0.0421171
Ciclev10011048m	pacid=20797662 transcript=Ciclev10011048m locus=Ciclev10011048m.g ID=Ciclev10011048m.v1.0 annot-version=v1.0	44.32	36	36	246	862	97.8263	5.19873	0.952863	0.868008	0.93706	0.91931	1.03645	0.999721	0.986052	1.00741	0.912551	0.0428963
Ciclev10012522m	pacid=20798550 transcript=Ciclev10012522m locus=Ciclev10012522m.g ID=Ciclev10012522m.v1.0 annot-version=v1.0	37.6	8	8	56	258	28.4246	7.10791	0.916952	0.905962	0.868462	0.897125	0.936285	0.980509	1.01724	0.978013	0.917294	0.0429034
Ciclev10001454m	pacid=20789331 transcript=Ciclev10001454m locus=Ciclev10001454m.g ID=Ciclev10001454m.v1.0 annot-version=v1.0	55.27	14	28	374	389	44.4507	10.1401	0.776375	0.861627	0.859986	0.832663	0.908581	0.917568	0.969179	0.931776	0.89363	0.0430597
Ciclev10008387m	pacid=20793262 transcript=Ciclev10008387m locus=Ciclev10008387m.g ID=Ciclev10008387m.v1.0 annot-version=v1.0	4.69	2	2	12	426	46.9038	5.61768	0.873096	0.966004	0.918702	0.919267	1.05427	0.997116	1.14069	1.06403	0.863952	0.0433294
Ciclev10018565m	pacid=20811754 transcript=Ciclev10018565m locus=Ciclev10018565m.g ID=Ciclev10018565m.v1.0 annot-version=v1.0	15.79	18	19	75	1191	132.417	8.36768	0.9414	0.892131	0.890386	0.907972	0.974054	0.94565	0.96953	0.963078	0.942781	0.0434387
Ciclev10007609m	pacid=20793165 transcript=Ciclev10007609m locus=Ciclev10007609m.g ID=Ciclev10007609m.v1.0 annot-version=v1.0	32.72	24	24	171	712	81.902	5.14795	0.980948	0.996009	0.975712	0.984223	1.00804	1.07865	1.07912	1.05527	0.932676	0.0435368
Ciclev10028578m	pacid=20814631 transcript=Ciclev10028578m locus=Ciclev10028578m.g ID=Ciclev10028578m.v1.0 annot-version=v1.0	6.72	1	3	5	402	44.3948	8.22119	1.09539	1.05042	0.986494	1.0441	0.924196	0.915813	0.974006	0.938005	1.11311	0.0436224
Ciclev10020794m	pacid=20811841 transcript=Ciclev10020794m locus=Ciclev10020794m.g ID=Ciclev10020794m.v1.0 annot-version=v1.0	6.96	3	3	4	359	40.047	9.05615	0.998427		1.01073	1.00458	1.03335		1.03263	1.03299	0.972496	0.0439315
Ciclev10019602m	pacid=20809172 transcript=Ciclev10019602m locus=Ciclev10019602m.g ID=Ciclev10019602m.v1.0 annot-version=v1.0	23.9	9	9	55	544	61.0015	8.86572	0.928855	0.89317	1.02485	0.948957	1.05865	1.06007	1.07199	1.06357	0.89224	0.0441965
Ciclev10018804m	pacid=20807270 transcript=Ciclev10018804m locus=Ciclev10018804m.g ID=Ciclev10018804m.v1.0 annot-version=v1.0	14.85	10	10	20	882	96.8783	6.48096	0.923728	0.915781	0.961483	0.933664	1.06172	0.970298	1.06418	1.03207	0.904656	0.0442134
Ciclev10025694m	pacid=20799552 transcript=Ciclev10025694m locus=Ciclev10025621m.g ID=Ciclev10025694m.v1.0 annot-version=v1.0	18.25	8	8	21	422	46.6312	6.29053	0.884074	0.899919	0.899157	0.894383	0.910944	0.939172	0.956268	0.935462	0.956088	0.044313
Ciclev10001501m	pacid=20789441 transcript=Ciclev10001501m locus=Ciclev10001382m.g ID=Ciclev10001501m.v1.0 annot-version=v1.0	45.53	11	13	73	380	41.0737	6.52197	1.02355	0.986405	1.00921	1.00639	0.875441	0.903542	0.972711	0.917231	1.0972	0.0445995
Ciclev10018786m	pacid=20809713 transcript=Ciclev10018786m locus=Ciclev10018786m.g ID=Ciclev10018786m.v1.0 annot-version=v1.0	28.56	20	20	106	893	98.6602	5.04639	0.958722	0.946753	0.986008	0.963828	0.993275	1.03081	1.05777	1.02729	0.938227	0.0449028
Ciclev10020393m	pacid=20811585 transcript=Ciclev10020393m locus=Ciclev10020393m.g ID=Ciclev10020393m.v1.0 annot-version=v1.0	33.5	8	8	36	409	44.5804	8.63135	0.657009	0.746969	0.697306	0.700428	0.610003	0.639435	0.574038	0.607826	1.15235	0.0450493
Ciclev10020186m	pacid=20810443 transcript=Ciclev10020186m locus=Ciclev10019779m.g ID=Ciclev10020186m.v1.0 annot-version=v1.0	4.1	1	2	3	439	48.3335	5.05908		1.08803	1.04553	1.06678		0.924629	0.860915	0.892772	1.19491	0.0451711
Ciclev10010861m	pacid=20799312 transcript=Ciclev10010861m locus=Ciclev10010861m.g ID=Ciclev10010861m.v1.0 annot-version=v1.0	8.95	4	4	8	458	51.4833	6.53662	0.983242	1.1218	1.15629	1.08711	0.887142	0.905365	0.967298	0.919935	1.18173	0.0453105
Ciclev10003767m	pacid=20788432 transcript=Ciclev10003767m locus=Ciclev10003767m.g ID=Ciclev10003767m.v1.0 annot-version=v1.0	50.89	18	20	136	395	44.5299	5.70654	1.00354	1.02739	0.978679	1.0032	0.964424	0.948486	0.966301	0.959737	1.04529	0.0455547
Ciclev10024213m	pacid=20808875 transcript=Ciclev10024213m locus=Ciclev10024213m.g ID=Ciclev10024213m.v1.0 annot-version=v1.0	9.37	8	8	16	1270	137.961	5.2876	1.09115	1.16568	1.03654	1.09779	1.01604	0.870126	0.91662	0.934261	1.17503	0.0455955
Ciclev10020878m	pacid=20811851 transcript=Ciclev10020878m locus=Ciclev10020878m.g ID=Ciclev10020878m.v1.0 annot-version=v1.0	9.09	2	2	9	352	37.6976	5.08447	1.07919	1.04699	0.909924	1.01203	0.858913	0.87114	0.858403	0.862819	1.17294	0.0456447
Ciclev10030496m	pacid=20802613 transcript=Ciclev10030496m locus=Ciclev10030496m.g ID=Ciclev10030496m.v1.0 annot-version=v1.0	17.19	22	22	62	1542	177.072	5.94775	0.903651	0.974831	0.909782	0.929421	1.00542	0.986029	0.998581	0.996676	0.932521	0.0456757
Ciclev10025987m	pacid=20799592 transcript=Ciclev10025987m locus=Ciclev10025987m.g ID=Ciclev10025987m.v1.0 annot-version=v1.0	34.48	10	10	39	348	40.7586	5.77002	0.951046	0.889866	0.854622	0.898512	1.06406	1.01467	0.963805	1.01418	0.885952	0.0457488
Ciclev10028171m	pacid=20813939 transcript=Ciclev10028171m locus=Ciclev10028171m.g ID=Ciclev10028171m.v1.0 annot-version=v1.0	24.3	9	11	56	535	57.5844	7.59131	0.897953	0.897306	0.914379	0.903213	0.886378	0.837919	0.853998	0.859432	1.05094	0.0459136
Ciclev10004309m	pacid=20791116 transcript=Ciclev10004309m locus=Ciclev10004309m.g ID=Ciclev10004309m.v1.0 annot-version=v1.0	59.31	16	49	930	843	93.7653	6.29053	1.02691	0.954245	0.953236	0.978131	1.04992	1.10364	1.04473	1.0661	0.917486	0.046176
Ciclev10009349m	pacid=20795593 transcript=Ciclev10009349m locus=Ciclev10009349m.g ID=Ciclev10009349m.v1.0 annot-version=v1.0	54.66	13	13	141	236	25.5577	5.37646	1.11473	1.06066	1.05107	1.07548	0.994174	0.992133	1.03417	1.00683	1.06819	0.046357
Ciclev10013909m	pacid=20797840 transcript=Ciclev10013909m locus=Ciclev10013909m.g ID=Ciclev10013909m.v1.0 annot-version=v1.0	55.4	4	10	276	139	15.4376	10.1108	0.7811	0.799471	0.809562	0.796711	0.838933	0.873574	0.823259	0.845255	0.942568	0.0464506
Ciclev10011017m	pacid=20797870 transcript=Ciclev10011017m locus=Ciclev10011017m.g ID=Ciclev10011017m.v1.0 annot-version=v1.0	34.62	26	26	164	930	103.657	5.45264	0.975493	0.974692	0.931328	0.960504	1.00099	1.02454	1.07062	1.03205	0.930677	0.0464932
Ciclev10007348m	pacid=20795660 transcript=Ciclev10007348m locus=Ciclev10007348m.g ID=Ciclev10007348m.v1.0 annot-version=v1.0	37.31	34	34	213	981	109.728	6.7417	0.96101	0.977871	0.97251	0.970464	0.986948	1.01224	1.03249	1.01056	0.960326	0.0465175
Ciclev10005759m	pacid=20791885 transcript=Ciclev10005759m locus=Ciclev10005759m.g ID=Ciclev10005759m.v1.0 annot-version=v1.0	68.91	13	13	87	238	25.5153	6.21436	1.03546	1.09399	1.13942	1.08962	1.00494	1.01317	0.980969	0.999694	1.08996	0.0465996
Ciclev10013058m	pacid=20798796 transcript=Ciclev10013058m locus=Ciclev10013058m.g ID=Ciclev10013058m.v1.0 annot-version=v1.0	69.5	3	13	237	141	16.1897	10.0962	1.1619	1.25089	1.05841	1.15706	0.94955	1.02861	0.979704	0.985956	1.17355	0.0467551
Ciclev10021398m	pacid=20808210 transcript=Ciclev10021398m locus=Ciclev10021398m.g ID=Ciclev10021398m.v1.0 annot-version=v1.0	25.93	7	7	31	297	32.6683	5.2876	0.967429	0.963442	0.962686	0.964519	1.07953	1.20913	1.03992	1.10953	0.869306	0.0470184
Ciclev10021871m	pacid=20809149 transcript=Ciclev10021871m locus=Ciclev10021871m.g ID=Ciclev10021871m.v1.0 annot-version=v1.0	33.47	5	5	49	248	26.4284	6.90283	1.0658	1.09014	0.897749	1.0179	1.17139	1.18706	1.2352	1.19788	0.849746	0.0470404
Ciclev10016070m	pacid=20818133 transcript=Ciclev10016070m locus=Ciclev10015955m.g ID=Ciclev10016070m.v1.0 annot-version=v1.0	3.62	1	1	2	304	34.1159	7.03467		0.879154	0.920117	0.899635		1.00348	0.988978	0.996231	0.903039	0.0470533
Ciclev10005458m	pacid=20792229 transcript=Ciclev10005458m locus=Ciclev10005458m.g ID=Ciclev10005458m.v1.0 annot-version=v1.0	30.82	7	7	32	318	34.787	7.89893	0.970248	0.991163	0.954722	0.972044	1.00701	1.11164	1.07065	1.0631	0.914349	0.0475363
Ciclev10004636m	pacid=20792464 transcript=Ciclev10004636m locus=Ciclev10004547m.g ID=Ciclev10004636m.v1.0 annot-version=v1.0	32.81	14	14	94	573	60.7826	7.45947	0.964295	0.991057	0.979384	0.978245	1.00795	1.09655	1.11227	1.07225	0.912326	0.0480262
Ciclev10001298m	pacid=20786736 transcript=Ciclev10001298m locus=Ciclev10001298m.g ID=Ciclev10001298m.v1.0 annot-version=v1.0	82.06	36	37	694	418	47.7908	4.57666	0.909742	0.881673	0.905951	0.899122	0.9237	0.987818	1.00169	0.971069	0.925909	0.048185
Ciclev10001854m	pacid=20785372 transcript=Ciclev10001854m locus=Ciclev10001854m.g ID=Ciclev10001854m.v1.0 annot-version=v1.0	6.21	2	2	10	322	34.0963	8.73389	1.17447		1.18947	1.18197	1.37805		1.30655	1.3423	0.880562	0.0481914
Ciclev10009180m	pacid=20793008 transcript=Ciclev10009180m locus=Ciclev10009180m.g ID=Ciclev10009180m.v1.0 annot-version=v1.0	12.18	4	4	23	271	30.4055	8.39697	1.01287	1.03324	1.00537	1.01716	1.04443	1.11961	1.13729	1.10044	0.924317	0.0484188
Ciclev10028085m	pacid=20813171 transcript=Ciclev10028085m locus=Ciclev10028085m.g ID=Ciclev10028085m.v1.0 annot-version=v1.0	59.62	33	34	759	582	61.5507	5.35107	0.973655	0.990269	1.04279	1.00224	1.04613	1.08016	1.08007	1.06879	0.937735	0.04852
Ciclev10001194m	pacid=20789418 transcript=Ciclev10001194m locus=Ciclev10001194m.g ID=Ciclev10001194m.v1.0 annot-version=v1.0	49.31	19	20	153	436	47.3311	8.41162	1.01579	0.959181	1.01822	0.99773	1.09224	1.03677	1.07835	1.06912	0.933228	0.0487748
Ciclev10031153m	pacid=20803481 transcript=Ciclev10031153m locus=Ciclev10031153m.g ID=Ciclev10031153m.v1.0 annot-version=v1.0	6.03	3	3	8	547	60.5797	5.87158	0.912553	0.949702	1.06152	0.974593	0.861408	0.841123	0.841137	0.847889	1.14943	0.0488876
Ciclev10020977m	pacid=20810991 transcript=Ciclev10020977m locus=Ciclev10020747m.g ID=Ciclev10020977m.v1.0 annot-version=v1.0	47.37	15	16	142	342	36.6101	7.04932	0.89517	0.916839	0.904322	0.905444	1.00865	0.985124	0.928634	0.974137	0.929483	0.0489626
Ciclev10000209m	pacid=20789389 transcript=Ciclev10000209m locus=Ciclev10000209m.g ID=Ciclev10000209m.v1.0 annot-version=v1.0	39.54	33	33	216	913	100.693	5.89697	0.974638	0.951727	0.965786	0.96405	0.981321	1.01128	1.02906	1.00722	0.957139	0.0490488
Ciclev10032705m	pacid=20803904 transcript=Ciclev10032705m locus=Ciclev10032705m.g ID=Ciclev10032705m.v1.0 annot-version=v1.0	10	2	2	5	220	24.582	9.34912	1.03547	0.863231	1.03917	0.979289	1.18811	1.10545	1.17646	1.15667	0.846643	0.0492005
Ciclev10007963m	pacid=20796068 transcript=Ciclev10007963m locus=Ciclev10007963m.g ID=Ciclev10007963m.v1.0 annot-version=v1.0	65.42	29	30	392	535	57.6289	7.45947	1.00313	0.953981	0.950687	0.969266	1.0335	1.01137	1.01565	1.02017	0.950101	0.049447
Ciclev10005442m	pacid=20791541 transcript=Ciclev10005442m locus=Ciclev10005442m.g ID=Ciclev10005442m.v1.0 annot-version=v1.0	2.5	1	1	5	320	36.2757	4.75439	0.962981	0.985741	1.07674	1.00849	0.904461	0.884912	0.928267	0.90588	1.11327	0.0499515
Ciclev10014473m	pacid=20815719 transcript=Ciclev10014473m locus=Ciclev10014471m.g ID=Ciclev10014473m.v1.0 annot-version=v1.0	33	14	18	108	694	74.5089	6.771	1.09512	1.11076	1.13427	1.11338	1.18134	1.21658	1.33154	1.24315	0.895612	0.0500434
Ciclev10032221m	pacid=20804536 transcript=Ciclev10032221m locus=Ciclev10032221m.g ID=Ciclev10032221m.v1.0 annot-version=v1.0	50.49	16	16	200	305	32.1547	10.272	0.922212	0.896003	0.932932	0.917049	0.977683	0.938339	0.971929	0.96265	0.95263	0.050284
Ciclev10000153m	pacid=20788871 transcript=Ciclev10000153m locus=Ciclev10000105m.g ID=Ciclev10000153m.v1.0 annot-version=v1.0	2.02	2	2	7	988	108.192	5.51611	1.00586	0.984894	0.994945	0.995232	0.910372	0.760899	0.90521	0.858827	1.15883	0.0506671
Ciclev10000947m	pacid=20789100 transcript=Ciclev10000947m locus=Ciclev10000947m.g ID=Ciclev10000947m.v1.0 annot-version=v1.0	3.04	2	2	4	493	53.3231	7.09326		1.06732	0.989708	1.02852		1.46831	1.31619	1.39225	0.738744	0.0509332
Ciclev10016133m	pacid=20815970 transcript=Ciclev10016133m locus=Ciclev10016133m.g ID=Ciclev10016133m.v1.0 annot-version=v1.0	37.8	7	7	31	291	30.6569	8.11865	0.825644	0.844311		0.834977	0.759598	0.783019		0.771309	1.08255	0.0511145
Ciclev10029603m	pacid=20813256 transcript=Ciclev10029603m locus=Ciclev10029605m.g ID=Ciclev10029603m.v1.0 annot-version=v1.0	26.27	4	4	24	118	12.7416	9.49561	0.812452	0.870788	0.794149	0.825796	0.991652	0.911738	0.891189	0.931527	0.886498	0.0511159
Ciclev10020469m	pacid=20807992 transcript=Ciclev10020469m locus=Ciclev10020464m.g ID=Ciclev10020469m.v1.0 annot-version=v1.0	36	14	14	60	400	44.1829	9.23193	1.02646	1.11845	1.06488	1.06993	0.924284	0.99045	0.99992	0.971552	1.10126	0.0512497
Ciclev10030863m	pacid=20802545 transcript=Ciclev10030863m locus=Ciclev10030863m.g ID=Ciclev10030863m.v1.0 annot-version=v1.0	62.48	38	39	331	693	77.1912	5.37646	0.964525	0.99666	1.02638	0.995854	1.04401	1.04111	1.07555	1.05356	0.945229	0.051428
Ciclev10028831m	pacid=20812604 transcript=Ciclev10028831m locus=Ciclev10028831m.g ID=Ciclev10028831m.v1.0 annot-version=v1.0	10.09	3	4	75	327	35.5375	4.94482	1.73243	2.05828	2.01293	1.93455	1.16746	1.49723	1.66768	1.44412	1.3396	0.0516872
Ciclev10011472m	pacid=20798995 transcript=Ciclev10011472m locus=Ciclev10011472m.g ID=Ciclev10011472m.v1.0 annot-version=v1.0	44.4	20	23	230	527	57.174	7.85498	0.966736	0.906653	0.899206	0.924199	0.977531	0.981113	0.995761	0.984802	0.938461	0.0517373
Ciclev10001509m	pacid=20788254 transcript=Ciclev10001509m locus=Ciclev10001509m.g ID=Ciclev10001509m.v1.0 annot-version=v1.0	19.53	7	7	42	379	41.529	8.26514	1.0134	0.966644	0.887363	0.955803	1.05568	1.04838	1.07096	1.05834	0.903115	0.051749
Ciclev10015402m	pacid=20815488 transcript=Ciclev10015402m locus=Ciclev10015402m.g ID=Ciclev10015402m.v1.0 annot-version=v1.0	8.45	3	3	8	414	45.814	6.58057	1.04315	0.937706	1.16441	1.04842	0.919484	0.795251	0.785601	0.833445	1.25794	0.0518172
Ciclev10025935m	pacid=20799595 transcript=Ciclev10025935m locus=Ciclev10025935m.g ID=Ciclev10025935m.v1.0 annot-version=v1.0	31.94	7	8	27	360	39.0263	6.97607	1.04099	1.02261	0.945983	1.0032	1.07207	1.09995	1.0854	1.08581	0.923918	0.0520873
Ciclev10020006m	pacid=20807020 transcript=Ciclev10020006m locus=Ciclev10020006m.g ID=Ciclev10020006m.v1.0 annot-version=v1.0	15.22	7	7	23	473	52.2027	6.31592	1.07884	1.16125	1.10305	1.11438	1.16916	1.29933	1.33716	1.26855	0.878469	0.052398
Ciclev10031847m	pacid=20804182 transcript=Ciclev10031847m locus=Ciclev10031847m.g ID=Ciclev10031847m.v1.0 annot-version=v1.0	61.01	3	20	459	377	41.6289	5.49072	0.990162	0.959397	0.810306	0.919955	1.03438	1.12204	1.11151	1.08931	0.844531	0.052439
Ciclev10031101m	pacid=20804479 transcript=Ciclev10031101m locus=Ciclev10031101m.g ID=Ciclev10031101m.v1.0 annot-version=v1.0	21.3	8	8	36	568	62.2035	5.47803	0.935632	0.80776	0.727437	0.82361	0.97524	0.988359	1.0108	0.991466	0.830699	0.0524853
Ciclev10027665m	pacid=20812866 transcript=Ciclev10027665m locus=Ciclev10027665m.g ID=Ciclev10027665m.v1.0 annot-version=v1.0	0.5	1	1	2	1994	218.818	5.90967	1.03217	0.976618		1.00439	0.891281	0.875787		0.883534	1.13679	0.0524854
Ciclev10014585m	pacid=20815785 transcript=Ciclev10014585m locus=Ciclev10014585m.g ID=Ciclev10014585m.v1.0 annot-version=v1.0	21.7	11	11	40	636	67.4738	7.00537	1.0107	1.04394	0.9864	1.01368	0.974682	0.858287	0.896028	0.909666	1.11434	0.0525437
Ciclev10026092m	pacid=20802288 transcript=Ciclev10026092m locus=Ciclev10026092m.g ID=Ciclev10026092m.v1.0 annot-version=v1.0	15.53	5	5	16	322	35.064	5.63037	1.00527	1.04727	1.08244	1.04499	0.875954	0.909833	0.998697	0.928161	1.12587	0.0526714
Ciclev10015521m	pacid=20816575 transcript=Ciclev10015521m locus=Ciclev10015175m.g ID=Ciclev10015521m.v1.0 annot-version=v1.0	43.65	17	17	170	394	44.4601	7.25439	0.929911	0.915123	0.956046	0.933693	1.00804	0.956756	0.996423	0.987074	0.94592	0.0527999
Ciclev10033122m	pacid=20803263 transcript=Ciclev10033122m locus=Ciclev10033122m.g ID=Ciclev10033122m.v1.0 annot-version=v1.0	49.11	5	5	38	112	12.7955	5.0083	0.984329	0.810662	0.868825	0.887939	1.071	1.01919	1.0149	1.03503	0.857888	0.0531249
Ciclev10025565m	pacid=20802192 transcript=Ciclev10025565m locus=Ciclev10025565m.g ID=Ciclev10025565m.v1.0 annot-version=v1.0	4.99	2	2	6	461	52.7131	7.81104	1.38069	1.17883	1.05652	1.20535	0.926829	0.938022	0.972591	0.945814	1.2744	0.0531342
Ciclev10025791m	pacid=20801110 transcript=Ciclev10025791m locus=Ciclev10025791m.g ID=Ciclev10025791m.v1.0 annot-version=v1.0	36.96	12	12	63	395	43.0852	5.35107	1.89369	1.39372	1.59287	1.62676	1.26956	1.22044	1.19759	1.2292	1.32343	0.0537022
Ciclev10012893m	pacid=20797632 transcript=Ciclev10012893m locus=Ciclev10012893m.g ID=Ciclev10012893m.v1.0 annot-version=v1.0	41.21	10	10	118	182	20.2933	9.02686	1.40312	1.42885	1.35221	1.39472	1.14665	1.24613	1.3281	1.24029	1.12451	0.0538193
Ciclev10028326m	pacid=20812845 transcript=Ciclev10028326m locus=Ciclev10028326m.g ID=Ciclev10028326m.v1.0 annot-version=v1.0	15.32	4	6	25	483	53.374	5.47803	1.17749	1.03436	1.17684	1.12956	0.885884	1.04166	0.912376	0.946639	1.19324	0.0539546
Ciclev10021540m	pacid=20809605 transcript=Ciclev10021540m locus=Ciclev10021533m.g ID=Ciclev10021540m.v1.0 annot-version=v1.0	8.83	2	2	3	283	31.8869	9.71533		1.07397	0.999658	1.03681		0.82298	0.716791	0.769886	1.34671	0.0541939
Ciclev10021801m	pacid=20810149 transcript=Ciclev10021801m locus=Ciclev10021801m.g ID=Ciclev10021801m.v1.0 annot-version=v1.0	30.08	6	8	30	256	28.7264	8.98291	0.964377	0.852145	0.847663	0.888061	0.966998	1.01126	1.02926	1.00251	0.885841	0.0542301
Ciclev10027825m	pacid=20813805 transcript=Ciclev10027825m locus=Ciclev10027825m.g ID=Ciclev10027825m.v1.0 annot-version=v1.0	27.57	21	23	122	827	91.3724	6.87354	1.00034	0.956097	0.974448	0.976963	0.91255	0.894783	0.951933	0.919755	1.0622	0.0542554
Ciclev10004615m	pacid=20790346 transcript=Ciclev10004615m locus=Ciclev10004615m.g ID=Ciclev10004615m.v1.0 annot-version=v1.0	29.16	3	19	148	583	63.2142	6.63916	0.971013		0.911138	0.941075	1.10796		1.06868	1.08832	0.864707	0.0543544
Ciclev10027769m	pacid=20814329 transcript=Ciclev10027769m locus=Ciclev10027769m.g ID=Ciclev10027769m.v1.0 annot-version=v1.0	32.08	26	27	85	932	106.105	5.37646	0.93267	0.917437	0.858522	0.902877	0.969935	0.954843	1.01036	0.978379	0.922829	0.0544666
Ciclev10029515m	pacid=20812785 transcript=Ciclev10029515m locus=Ciclev10029515m.g ID=Ciclev10029515m.v1.0 annot-version=v1.0	4.79	1	1	5	146	15.5921	9.39307	0.970248	0.993768	0.893521	0.952513	1.01577	1.20916	1.21638	1.1471	0.830362	0.0546492
Ciclev10000835m	pacid=20786302 transcript=Ciclev10000835m locus=Ciclev10000835m.g ID=Ciclev10000835m.v1.0 annot-version=v1.0	42.13	10	22	214	527	58.5388	8.32373	0.928996	1.04811	1.02014	0.999083	1.07568	1.12927	1.10861	1.10452	0.90454	0.0546814
Ciclev10017021m	pacid=20815073 transcript=Ciclev10017021m locus=Ciclev10017021m.g ID=Ciclev10017021m.v1.0 annot-version=v1.0	20.13	1	4	43	159	17.9597	4.85596	1.19867	0.915819	1.14828	1.08759	0.789509	0.842598	0.890005	0.840704	1.29366	0.0547218
Ciclev10004117m	pacid=20792482 transcript=Ciclev10004117m locus=Ciclev10004117m.g ID=Ciclev10004117m.v1.0 annot-version=v1.0	2.6	6	6	8	2651	300.403	7.41553	0.999652	1.06574	0.980775	1.01539	0.956457	0.758629	0.753546	0.822877	1.23395	0.0547306
Ciclev10000296m	pacid=20786741 transcript=Ciclev10000296m locus=Ciclev10000296m.g ID=Ciclev10000296m.v1.0 annot-version=v1.0	60.85	51	52	491	820	94.0259	5.021	0.937333	0.978165	0.977938	0.964479	0.989873	1.03863	1.02491	1.01781	0.947606	0.0550419
Ciclev10014682m	pacid=20817898 transcript=Ciclev10014682m locus=Ciclev10014682m.g ID=Ciclev10014682m.v1.0 annot-version=v1.0	7.06	3	3	5	595	67.6111	8.83643	0.958357	0.919323	0.890291	0.922657	1.16348	1.09872	0.97597	1.07939	0.854795	0.0550511
Ciclev10000554m	pacid=20785834 transcript=Ciclev10000554m locus=Ciclev10000554m.g ID=Ciclev10000554m.v1.0 annot-version=v1.0	18.48	9	10	25	644	71.7842	5.61768	0.901981	0.869499	0.921039	0.897506	1.04357	0.969947	0.94498	0.986165	0.910097	0.0557705
Ciclev10030758m	pacid=20804120 transcript=Ciclev10030758m locus=Ciclev10030758m.g ID=Ciclev10030758m.v1.0 annot-version=v1.0	3.73	3	3	5	778	89.2056	6.53662		1.00031	0.894313	0.947311		1.15514	1.17346	1.1643	0.813629	0.0562974
Ciclev10028074m	pacid=20813568 transcript=Ciclev10028074m locus=Ciclev10028074m.g ID=Ciclev10028074m.v1.0 annot-version=v1.0	13.24	7	7	11	589	66.6002	8.03076	1.09112	1.05192		1.07152	0.937465	0.828919	0.728845	0.831743	1.28828	0.0563056
Ciclev10022847m	pacid=20810387 transcript=Ciclev10022847m locus=Ciclev10022847m.g ID=Ciclev10022847m.v1.0 annot-version=v1.0	28.68	3	3	10	129	15.077	9.56885	1.00195	0.94606	0.944492	0.964168	1.02166	1.09596	1.02237	1.04666	0.921185	0.0566294
Ciclev10019266m	pacid=20806816 transcript=Ciclev10019266m locus=Ciclev10019266m.g ID=Ciclev10019266m.v1.0 annot-version=v1.0	11.74	6	6	13	639	73.4145	8.07471	0.976333		0.962022	0.969178	1.06085		1.02657	1.04371	0.928589	0.056834
Ciclev10019809m	pacid=20811540 transcript=Ciclev10019809m locus=Ciclev10019809m.g ID=Ciclev10019809m.v1.0 annot-version=v1.0	18.89	8	8	20	503	57.9699	9.12939	0.866711	0.844333	0.787165	0.832736	0.943494	0.874336	0.953745	0.923858	0.901368	0.0570103
Ciclev10032697m	pacid=20804994 transcript=Ciclev10032697m locus=Ciclev10032697m.g ID=Ciclev10032697m.v1.0 annot-version=v1.0	59.01	11	11	188	222	23.9654	5.08447	1.12725	1.00249	1.09078	1.07351	1.31956	1.18757	1.17903	1.22872	0.873678	0.0572096
Ciclev10013157m	pacid=20797212 transcript=Ciclev10013157m locus=Ciclev10013157m.g ID=Ciclev10013157m.v1.0 annot-version=v1.0	28.07	4	4	68	114	13.067	10.814	0.982448	1.02361	1.09393	1.03333	0.959101	0.905766	0.946791	0.937219	1.10255	0.0572108
Ciclev10030218m	pacid=20814643 transcript=Ciclev10030218m locus=Ciclev10030218m.g ID=Ciclev10030218m.v1.0 annot-version=v1.0	64.53	31	31	328	561	62.7212	4.77979	0.990882	0.940272	0.996443	0.975866	1.00985	1.03935	1.04221	1.03047	0.947014	0.0573066
Ciclev10031719m	pacid=20805234 transcript=Ciclev10031719m locus=Ciclev10031719m.g ID=Ciclev10031719m.v1.0 annot-version=v1.0	55.47	18	18	88	402	43.9779	7.98682	0.950651	0.95734	0.985806	0.964599	0.990874	1.09144	1.06508	1.04913	0.919425	0.0573717
Ciclev10007533m	pacid=20793238 transcript=Ciclev10007533m locus=Ciclev10007533m.g ID=Ciclev10007533m.v1.0 annot-version=v1.0	6.01	4	4	4	766	85.5756	8.30908		0.908471	0.845283	0.876877		1.01718	0.998787	1.00798	0.869933	0.0576029
Ciclev10015309m	pacid=20815621 transcript=Ciclev10015309m locus=Ciclev10015309m.g ID=Ciclev10015309m.v1.0 annot-version=v1.0	25.99	9	9	32	431	47.4979	6.39209	1.18324	1.16478	1.21773	1.18858	1.15064	1.11425	1.06092	1.1086	1.07214	0.0577348
Ciclev10028932m	pacid=20813455 transcript=Ciclev10028932m locus=Ciclev10028932m.g ID=Ciclev10028932m.v1.0 annot-version=v1.0	34.55	10	10	46	301	32.6647	4.76709	0.95527	0.967538	0.971794	0.964867	0.990957	1.03747	1.08543	1.03795	0.929589	0.0577827
Ciclev10018962m	pacid=20811113 transcript=Ciclev10018962m locus=Ciclev10018965m.g ID=Ciclev10018962m.v1.0 annot-version=v1.0	61.44	9	47	2001	765	84.6237	6.93213	0.99735	0.969604	0.937148	0.968034	1.04159	1.28273	1.14756	1.15729	0.836465	0.0580858
Ciclev10008707m	pacid=20792679 transcript=Ciclev10008707m locus=Ciclev10008707m.g ID=Ciclev10008707m.v1.0 annot-version=v1.0	20.98	6	6	11	367	41.5934	5.57959	0.965777	0.892629	0.935405	0.93127	1.04165	1.01052	0.972227	1.00813	0.923759	0.0581025
Ciclev10032027m	pacid=20804971 transcript=Ciclev10032027m locus=Ciclev10031949m.g ID=Ciclev10032027m.v1.0 annot-version=v1.0	57.35	5	18	198	340	37.5271	6.62451		1.66891	1.46323	1.56607	1.18983	1.32951	1.06922	1.19618	1.30922	0.0581243
Ciclev10026251m	pacid=20801515 transcript=Ciclev10026251m locus=Ciclev10026251m.g ID=Ciclev10026251m.v1.0 annot-version=v1.0	56.88	13	14	166	276	29.2353	8.74854	0.920297	0.906796	0.970209	0.932434	0.96703	1.03811	1.01722	1.00745	0.925537	0.0584964
Ciclev10028670m	pacid=20813715 transcript=Ciclev10028670m locus=Ciclev10028670m.g ID=Ciclev10028670m.v1.0 annot-version=v1.0	22.93	6	7	43	375	41.0183	6.60986		1.04881	1.21354	1.13117	0.945426	0.928214	0.96037	0.94467	1.19743	0.0585168
Ciclev10009405m	pacid=20793443 transcript=Ciclev10009405m locus=Ciclev10009013m.g ID=Ciclev10009405m.v1.0 annot-version=v1.0	11.61	2	2	9	224	25.1909	9.43701	0.969167	1.1599	1.17046	1.09984	0.916494	0.817926	0.540532	0.758317	1.45037	0.0585795
Ciclev10022984m	pacid=20806788 transcript=Ciclev10022984m locus=Ciclev10022984m.g ID=Ciclev10022984m.v1.0 annot-version=v1.0	51.89	5	5	16	106	12.4383	7.03467	1.07189	1.25155	1.2298	1.18441	0.960365	1.06951	1.01387	1.01458	1.16739	0.0587217
Ciclev10001785m	pacid=20787469 transcript=Ciclev10001785m locus=Ciclev10001785m.g ID=Ciclev10001785m.v1.0 annot-version=v1.0	21.92	8	8	18	333	37.817	7.82568	0.966025	0.986263	1.05971	1.004	0.904286	0.829348	0.939307	0.89098	1.12685	0.0588494
Ciclev10008837m	pacid=20793760 transcript=Ciclev10008837m locus=Ciclev10008727m.g ID=Ciclev10008837m.v1.0 annot-version=v1.0	16.13	4	4	8	341	38.1422	8.88037	0.889404	0.779295	0.880126	0.849608	0.963813	1.01601	1.20316	1.06099	0.800766	0.0589652
Ciclev10000951m	pacid=20786358 transcript=Ciclev10000951m locus=Ciclev10000951m.g ID=Ciclev10000951m.v1.0 annot-version=v1.0	28.86	7	9	57	492	56.8732	7.35693	0.880313	0.87465	0.942668	0.89921	0.996342	0.970639	1.11166	1.02621	0.876241	0.0589833
Ciclev10016269m	pacid=20816271 transcript=Ciclev10016269m locus=Ciclev10016269m.g ID=Ciclev10016269m.v1.0 annot-version=v1.0	14.18	3	3	18	268	29.6063	5.87158	1.15866	1.1801	1.00014	1.11297	1.34315	1.25748	1.24509	1.28191	0.868214	0.0590699
Ciclev10021134m	pacid=20810773 transcript=Ciclev10021134m locus=Ciclev10021134m.g ID=Ciclev10021134m.v1.0 annot-version=v1.0	50	15	15	42	326	34.4796	6.03662	1.00027	1.05553	1.12218	1.05932	0.9263	0.986787	0.95637	0.956486	1.10752	0.0591376
Ciclev10011146m	pacid=20796916 transcript=Ciclev10011146m locus=Ciclev10011146m.g ID=Ciclev10011146m.v1.0 annot-version=v1.0	41.94	24	24	121	744	81.7412	6.29053	0.943616	0.963745	0.999875	0.969079	1.00365	1.03438	1.07339	1.03714	0.934379	0.0591969
Ciclev10025129m	pacid=20801477 transcript=Ciclev10025129m locus=Ciclev10025063m.g ID=Ciclev10025129m.v1.0 annot-version=v1.0	17.32	10	12	62	641	74.02	8.41162	0.824183	0.812241	0.948829	0.861751	0.947765	1.00897	1.00371	0.986814	0.873266	0.0592432
Ciclev10025762m	pacid=20800188 transcript=Ciclev10025762m locus=Ciclev10025762m.g ID=Ciclev10025762m.v1.0 annot-version=v1.0	10.67	4	4	8	403	45.4182	8.68994	0.822655	0.849791		0.836223	0.944354	0.907462		0.925908	0.903139	0.0594372
Ciclev10014469m	pacid=20815391 transcript=Ciclev10014469m locus=Ciclev10014469m.g ID=Ciclev10014469m.v1.0 annot-version=v1.0	13.53	8	8	29	695	77.9897	6.04932	0.922554	0.965045	0.732306	0.873302	1.00371	1.18212	1.13062	1.10548	0.789972	0.0595962
Ciclev10011995m	pacid=20797631 transcript=Ciclev10011995m locus=Ciclev10011995m.g ID=Ciclev10011995m.v1.0 annot-version=v1.0	15.9	5	6	25	371	39.8371	5.65576	0.978903	0.912583	0.963307	0.951598	1.03625	1.16167	1.02826	1.07539	0.884883	0.0600368
Ciclev10025018m	pacid=20799536 transcript=Ciclev10025018m locus=Ciclev10025018m.g ID=Ciclev10025018m.v1.0 annot-version=v1.0	14.99	7	8	25	714	79.4658	6.50732	1.00346	1.00445	1.00805	1.00532	1.04024	1.15012	1.20656	1.13231	0.88785	0.0600762
Ciclev10019080m	pacid=20807266 transcript=Ciclev10019080m locus=Ciclev10019080m.g ID=Ciclev10019080m.v1.0 annot-version=v1.0	8.64	6	6	19	706	78.5104	8.80713	0.822042	0.960799	0.862507	0.881782	0.789845	0.749295	0.772162	0.770434	1.14453	0.0600942
Ciclev10020821m	pacid=20806568 transcript=Ciclev10020821m locus=Ciclev10020821m.g ID=Ciclev10020821m.v1.0 annot-version=v1.0	39.33	9	14	215	356	39.4092	6.0874	0.884879	1.01268	1.04331	0.98029	1.11462	1.23317	1.097	1.14826	0.853716	0.0602099
Ciclev10026334m	pacid=20801557 transcript=Ciclev10026334m locus=Ciclev10026334m.g ID=Ciclev10026334m.v1.0 annot-version=v1.0	28.29	5	6	36	251	28.7137	9.83252	1.07916	0.998337	0.977848	1.01845	0.837325	0.901465	0.957049	0.898613	1.13335	0.0611548
Ciclev10006034m	pacid=20792079 transcript=Ciclev10006034m locus=Ciclev10006034m.g ID=Ciclev10006034m.v1.0 annot-version=v1.0	44.32	6	6	15	176	20.1598	4.57666	0.922085	0.837673	0.86605	0.875269	0.954283	0.962035	0.922844	0.946387	0.924853	0.0611917
Ciclev10024065m	pacid=20808019 transcript=Ciclev10024065m locus=Ciclev10024065m.g ID=Ciclev10024065m.v1.0 annot-version=v1.0	14.07	14	14	33	1208	139.116	8.20654	0.929707	0.873982	0.906669	0.903453	1.0641	0.961278	0.969507	0.998295	0.904995	0.0612185
Ciclev10001318m	pacid=20785651 transcript=Ciclev10001318m locus=Ciclev10001318m.g ID=Ciclev10001318m.v1.0 annot-version=v1.0	8.47	3	3	5	413	44.1789	5.64307	1.04256	1.23439	1.29494	1.19063	1.03556	0.92371	0.9748	0.978023	1.21738	0.0618351
Ciclev10019559m	pacid=20811649 transcript=Ciclev10019559m locus=Ciclev10019526m.g ID=Ciclev10019559m.v1.0 annot-version=v1.0	46.57	23	23	139	554	61.909	8.646	0.956043	0.976464	0.930247	0.954251	0.9935	0.988223	1.03512	1.00561	0.948923	0.0618456
Ciclev10025149m	pacid=20799420 transcript=Ciclev10025149m locus=Ciclev10025149m.g ID=Ciclev10025149m.v1.0 annot-version=v1.0	22.31	12	12	69	632	69.6364	6.49365	0.892618	0.913922	0.888175	0.898238	0.96446	1.00107	0.920036	0.961855	0.93386	0.0618796
Ciclev10002702m	pacid=20789048 transcript=Ciclev10002702m locus=Ciclev10002702m.g ID=Ciclev10002702m.v1.0 annot-version=v1.0	23.35	1	3	19	167	19.0968	8.646	1.05115	0.996675	1.02327	1.0237	0.977414	0.94257	0.988977	0.969654	1.05573	0.0619152
Ciclev10008154m	pacid=20795200 transcript=Ciclev10008154m locus=Ciclev10008154m.g ID=Ciclev10008154m.v1.0 annot-version=v1.0	37.03	16	16	97	478	53.3386	6.04932	0.900147	1.01455	1.00597	0.973553	1.03362	1.1538	1.14409	1.1105	0.876677	0.0619593
Ciclev10020929m	pacid=20805940 transcript=Ciclev10020929m locus=Ciclev10020927m.g ID=Ciclev10020929m.v1.0 annot-version=v1.0	29.11	9	9	28	347	38.3918	7.32764	0.92936	0.63351	0.894691	0.819187	1.07544	1.01541	1.1295	1.07345	0.763134	0.0621208
Ciclev10028089m	pacid=20814304 transcript=Ciclev10028089m locus=Ciclev10028089m.g ID=Ciclev10028089m.v1.0 annot-version=v1.0	1.04	1	1	4	578	64.8807	7.54736	0.998847	1.03381	0.888565	0.973741	1.05973	1.22466	1.33101	1.20513	0.807994	0.0623644
Ciclev10000395m	pacid=20789421 transcript=Ciclev10000395m locus=Ciclev10000395m.g ID=Ciclev10000395m.v1.0 annot-version=v1.0	8.78	5	5	10	740	85.1636	4.97021		1.09402	1.09895	1.09649	0.97656	1.05348	1.00911	1.01305	1.08237	0.062829
Ciclev10012733m	pacid=20798962 transcript=Ciclev10012733m locus=Ciclev10012355m.g ID=Ciclev10012733m.v1.0 annot-version=v1.0	4.67	1	1	12	214	23.9793	5.35107	1.15536	1.01074	1.07911	1.08174	0.99047	0.956579	0.859	0.93535	1.15651	0.0633556
Ciclev10033104m	pacid=20802675 transcript=Ciclev10033104m locus=Ciclev10033104m.g ID=Ciclev10033104m.v1.0 annot-version=v1.0	24.14	2	2	8	116	12.9957	9.30518	0.946435	1.06959	1.05563	1.02388	0.754826	0.888142	0.928711	0.857226	1.19442	0.0633657
Ciclev10018143m	pacid=20815081 transcript=Ciclev10018143m locus=Ciclev10018143m.g ID=Ciclev10018143m.v1.0 annot-version=v1.0	1.55	1	1	2	515	58.7054	5.8208	0.920672	0.87914		0.899906	0.747351	0.648927		0.698139	1.28901	0.0634819
Ciclev10031848m	pacid=20802655 transcript=Ciclev10031848m locus=Ciclev10031848m.g ID=Ciclev10031848m.v1.0 annot-version=v1.0	22.81	7	7	38	377	42.8788	6.68311	1.09801	1.02301	1.05003	1.05702	1.21595	1.09426	1.18798	1.16606	0.906488	0.0636186
Ciclev10018853m	pacid=20807320 transcript=Ciclev10018853m locus=Ciclev10018853m.g ID=Ciclev10018853m.v1.0 annot-version=v1.0	24.97	18	19	41	837	91.5764	5.30029	0.916416	0.84405	0.910967	0.890478	0.956076	0.937154	0.984439	0.959223	0.928332	0.0637022
Ciclev10007803m	pacid=20795267 transcript=Ciclev10007803m locus=Ciclev10007803m.g ID=Ciclev10007803m.v1.0 annot-version=v1.0	26.68	11	11	23	596	66.3573	5.89697	1.02683	1.04066	1.00776	1.02508	0.873887	0.997674	0.917807	0.929789	1.10249	0.0637519
Ciclev10005416m	pacid=20789678 transcript=Ciclev10005416m locus=Ciclev10005397m.g ID=Ciclev10005416m.v1.0 annot-version=v1.0	16.26	5	5	11	326	35.5964	10.228	1.00002	1.04997	1.00052	1.01683	0.849326	0.926285	0.972737	0.916116	1.10994	0.0638295
Ciclev10030436m	pacid=20813066 transcript=Ciclev10030436m locus=Ciclev10030436m.g ID=Ciclev10030436m.v1.0 annot-version=v1.0	21.07	9	9	43	394	44.4994	6.25244	0.944132	0.923376	0.966513	0.944674	0.973022	1.00644	1.05111	1.01019	0.935144	0.0641705
Ciclev10031342m	pacid=20805040 transcript=Ciclev10031342m locus=Ciclev10031342m.g ID=Ciclev10031342m.v1.0 annot-version=v1.0	19.8	10	10	16	490	55.9358	8.83643	0.844368	0.948546	0.912195	0.901703	1.01432	0.981027	0.966142	0.987162	0.91343	0.064191
Ciclev10005089m	pacid=20791830 transcript=Ciclev10005089m locus=Ciclev10005019m.g ID=Ciclev10005089m.v1.0 annot-version=v1.0	27.72	9	9	32	404	43.8364	8.74854	0.966939	1.00085	0.974767	0.980851	1.01554	1.09274	1.03033	1.0462	0.937532	0.0643133
Ciclev10025918m	pacid=20800730 transcript=Ciclev10025918m locus=Ciclev10025921m.g ID=Ciclev10025918m.v1.0 annot-version=v1.0	32.14	9	10	36	364	39.9901	7.60596	1.31867	1.48089	1.45635	1.41864	1.12301	1.30902	1.25492	1.22899	1.15431	0.0643703
Ciclev10032388m	pacid=20803395 transcript=Ciclev10032388m locus=Ciclev10032238m.g ID=Ciclev10032388m.v1.0 annot-version=v1.0	29.41	7	7	108	272	29.2544	6.30322	1.0759	1.16471	1.2338	1.15814	0.990276	1.01696	1.07326	1.02683	1.12787	0.0644433
Ciclev10022699m	pacid=20810936 transcript=Ciclev10022699m locus=Ciclev10022699m.g ID=Ciclev10022699m.v1.0 annot-version=v1.0	12.75	2	2	6	149	17.2605	6.1001	2.11606	1.39422	1.33689	1.61572	1.14686	0.806435	0.805703	0.919667	1.75686	0.0647456
Ciclev10005030m	pacid=20792099 transcript=Ciclev10005030m locus=Ciclev10005021m.g ID=Ciclev10005030m.v1.0 annot-version=v1.0	22.59	9	10	46	425	49.2156	10.5503	1.141	1.06597	1.07433	1.09377	1.04708	1.02194	1.02087	1.02996	1.06195	0.0647861
Ciclev10000007m	pacid=20788883 transcript=Ciclev10000007m locus=Ciclev10000007m.g ID=Ciclev10000007m.v1.0 annot-version=v1.0	31.41	53	54	216	2267	252.712	6.41748	1.03534	0.969724	0.987993	0.997685	1.06894	1.03437	1.05668	1.05333	0.947172	0.0648258
Ciclev10012297m	pacid=20797735 transcript=Ciclev10012297m locus=Ciclev10012299m.g ID=Ciclev10012297m.v1.0 annot-version=v1.0	2.95	1	1	3	305	34.6136	6.26514	0.592266	0.792462	0.723641	0.70279	0.580844	0.524378	0.539986	0.548403	1.28152	0.0648573
Ciclev10010925m	pacid=20797411 transcript=Ciclev10010925m locus=Ciclev10010925m.g ID=Ciclev10010925m.v1.0 annot-version=v1.0	9.82	12	13	25	1293	145.273	6.37939	1.02332	1.01003	1.13814	1.05717	0.95902	0.965194	0.89407	0.939428	1.12533	0.0648972
Ciclev10021456m	pacid=20811222 transcript=Ciclev10021456m locus=Ciclev10021169m.g ID=Ciclev10021456m.v1.0 annot-version=v1.0	51.88	15	15	150	293	32.1088	8.47021	0.93215	0.958965	0.925657	0.938924	0.961639	1.02772	1.06029	1.01655	0.923638	0.065104
Ciclev10025584m	pacid=20801810 transcript=Ciclev10025584m locus=Ciclev10025584m.g ID=Ciclev10025584m.v1.0 annot-version=v1.0	21.46	7	8	42	452	50.1695	6.66846		0.965096	0.934681	0.949888		1.10805	1.04672	1.07738	0.881662	0.065112
Ciclev10026828m	pacid=20799591 transcript=Ciclev10026828m locus=Ciclev10026828m.g ID=Ciclev10026828m.v1.0 annot-version=v1.0	24	3	3	22	100	11.4197	8.68994	1.04406	0.97951	1.01473	1.01277	0.911193	0.968082	0.962363	0.947213	1.06921	0.0651758
Ciclev10001434m	pacid=20785580 transcript=Ciclev10001434m locus=Ciclev10001434m.g ID=Ciclev10001434m.v1.0 annot-version=v1.0	78.52	25	25	159	391	42.6019	6.07471	1.00142	0.978498	0.96903	0.982981	1.01525	1.09564	1.03488	1.04859	0.937432	0.0653791
Ciclev10031896m	pacid=20804869 transcript=Ciclev10031896m locus=Ciclev10031896m.g ID=Ciclev10031896m.v1.0 annot-version=v1.0	47.25	14	14	90	364	38.3328	6.39209	1.03643	1.13461	1.12018	1.09708	0.991012	1.02751	1.02498	1.0145	1.08139	0.0654788
Ciclev10030624m	pacid=20802801 transcript=Ciclev10030624m locus=Ciclev10030624m.g ID=Ciclev10030624m.v1.0 annot-version=v1.0	37.36	36	36	237	1001	109.811	6.0874	0.929237	0.903407	0.917157	0.9166	0.94047	0.930243	0.950404	0.940372	0.974721	0.065911
Ciclev10018576m	pacid=20806874 transcript=Ciclev10018576m locus=Ciclev10018576m.g ID=Ciclev10018576m.v1.0 annot-version=v1.0	28.42	30	30	135	1161	132.356	6.25244	0.934489	0.935801	0.940558	0.936949	0.974956	0.957583	0.945011	0.959183	0.97682	0.0663938
Ciclev10011457m	pacid=20799256 transcript=Ciclev10011457m locus=Ciclev10011457m.g ID=Ciclev10011457m.v1.0 annot-version=v1.0	4.13	2	2	8	533	59.5966	9.33447	0.809703	0.721137	0.871895	0.800912	1.02697	0.940312	0.886104	0.95113	0.842063	0.0664159
Ciclev10015394m	pacid=20819032 transcript=Ciclev10015394m locus=Ciclev10015394m.g ID=Ciclev10015394m.v1.0 annot-version=v1.0	7.71	3	3	7	415	47.3035	6.48096	0.99863	1.36599	1.12946	1.16469	0.871767	0.816913	0.949086	0.879255	1.32463	0.0667001
Ciclev10011909m	pacid=20797347 transcript=Ciclev10011909m locus=Ciclev10011909m.g ID=Ciclev10011909m.v1.0 annot-version=v1.0	43.65	17	17	247	394	43.4175	6.55127	0.917605	0.968231	0.94302	0.942952	0.971875	1.11358	1.08998	1.05848	0.890856	0.0667517
Ciclev10025436m	pacid=20800842 transcript=Ciclev10025436m locus=Ciclev10025436m.g ID=Ciclev10025436m.v1.0 annot-version=v1.0	5.58	3	3	12	502	57.1567	8.39697	0.916862	0.817862	0.893271	0.875999	0.976334	0.931337	1.03067	0.979448	0.89438	0.0669643
Ciclev10017927m	pacid=20817775 transcript=Ciclev10017927m locus=Ciclev10017927m.g ID=Ciclev10017927m.v1.0 annot-version=v1.0	1.09	1	1	2	735	82.8067	6.58057		1.28779	1.36319	1.32549		1.0403	0.845458	0.942878	1.40579	0.0671218
Ciclev10029302m	pacid=20813351 transcript=Ciclev10029302m locus=Ciclev10029040m.g ID=Ciclev10029302m.v1.0 annot-version=v1.0	12.38	2	2	7	202	21.5928	7.34229	1.24088	1.54794	1.33826	1.37569	1.14291	1.12324	1.17418	1.14678	1.19962	0.0672223
Ciclev10019184m	pacid=20810311 transcript=Ciclev10019184m locus=Ciclev10019184m.g ID=Ciclev10019184m.v1.0 annot-version=v1.0	67.77	32	51	928	667	73.5071	5.21143	0.886632	0.952238	0.971406	0.936759	0.975619	1.05787	1.0561	1.02986	0.909597	0.0672634
Ciclev10028169m	pacid=20814554 transcript=Ciclev10028169m locus=Ciclev10028169m.g ID=Ciclev10028169m.v1.0 annot-version=v1.0	7.65	3	3	4	536	59.5506	6.87354	1.09964	1.05645		1.07804	1.16679	1.20829		1.18754	0.907798	0.0673452
Ciclev10016700m	pacid=20816549 transcript=Ciclev10016700m locus=Ciclev10016692m.g ID=Ciclev10016700m.v1.0 annot-version=v1.0	51.2	10	10	57	209	23.9124	6.13818	0.9222	1.00971	1.04251	0.991474	1.07787	1.1424	1.07137	1.09721	0.90363	0.0674869
Ciclev10015670m	pacid=20817668 transcript=Ciclev10015670m locus=Ciclev10015670m.g ID=Ciclev10015670m.v1.0 annot-version=v1.0	16.53	5	5	16	369	39.9121	6.97607	0.976855	1.04231	1.03769	1.01895	1.08078	1.16012	1.07474	1.10521	0.92195	0.0675916
Ciclev10008034m	pacid=20794392 transcript=Ciclev10008034m locus=Ciclev10008034m.g ID=Ciclev10008034m.v1.0 annot-version=v1.0	44.05	20	21	154	513	57.0352	5.63037	0.941337	0.99916	0.971143	0.970547	1.01046	1.0286	1.08924	1.04276	0.930744	0.0680099
Ciclev10006172m	pacid=20792232 transcript=Ciclev10006172m locus=Ciclev10006172m.g ID=Ciclev10006172m.v1.0 annot-version=v1.0	45.45	5	5	46	143	16.1893	9.62744	1.23625	1.11033	0.986652	1.11108	0.978256	0.860772	0.89897	0.912666	1.2174	0.068044
Ciclev10004554m	pacid=20790938 transcript=Ciclev10004554m locus=Ciclev10004554m.g ID=Ciclev10004554m.v1.0 annot-version=v1.0	11.9	6	6	11	622	70.387	5.24951	1.17059	1.19595	1.14827	1.1716	1.02253	1.04797	1.14602	1.07218	1.09274	0.0681926
Ciclev10030825m	pacid=20802458 transcript=Ciclev10030825m locus=Ciclev10030825m.g ID=Ciclev10030825m.v1.0 annot-version=v1.0	44.43	30	30	185	718	82.7889	7.73779	0.893714	0.954568	0.896695	0.914992	0.976676	0.988747	0.949894	0.971772	0.941571	0.0681969
Ciclev10019588m	pacid=20807469 transcript=Ciclev10019588m locus=Ciclev10019588m.g ID=Ciclev10019588m.v1.0 annot-version=v1.0	54.86	26	27	308	545	59.1701	6.26514	0.935687	0.851143	0.867237	0.884689	0.972853	0.928019	0.985921	0.962264	0.919382	0.0682793
Ciclev10025845m	pacid=20802082 transcript=Ciclev10025845m locus=Ciclev10025845m.g ID=Ciclev10025845m.v1.0 annot-version=v1.0	2.11	1	1	2	380	42.2935	9.39307		0.688523	0.591045	0.639784		0.47012	0.442537	0.456328	1.40203	0.0684934
Ciclev10032525m	pacid=20803709 transcript=Ciclev10032525m locus=Ciclev10032525m.g ID=Ciclev10032525m.v1.0 annot-version=v1.0	19.69	4	4	21	254	29.6956	6.17627	1.28865	1.04642	1.14015	1.15841	0.960632	0.860179	1.02311	0.947973	1.22198	0.0685263
Ciclev10013690m	pacid=20797717 transcript=Ciclev10013690m locus=Ciclev10013690m.g ID=Ciclev10013690m.v1.0 annot-version=v1.0	68.79	1	12	174	173	19.1813	10.1401	2.14289	1.1195	1.306	1.5228	0.773661	0.653617	0.784476	0.737252	2.06551	0.0686205
Ciclev10014050m	pacid=20816163 transcript=Ciclev10014050m locus=Ciclev10014046m.g ID=Ciclev10014050m.v1.0 annot-version=v1.0	23.78	23	25	97	1371	148.286	6.31592	0.975369	1.00781	0.99012	0.991101	1.00584	1.0292	1.03882	1.02462	0.967285	0.0687914
Ciclev10018808m	pacid=20807693 transcript=Ciclev10018808m locus=Ciclev10018808m.g ID=Ciclev10018808m.v1.0 annot-version=v1.0	54.74	42	42	371	875	98.5987	6.04932	0.959002	0.942796	0.94213	0.947976	0.985316	0.964811	1.02011	0.99008	0.957474	0.0690702
Ciclev10032636m	pacid=20805408 transcript=Ciclev10032636m locus=Ciclev10032636m.g ID=Ciclev10032636m.v1.0 annot-version=v1.0	50.64	14	17	219	233	26.1375	10.2573	0.948239	0.87762	0.908533	0.911464	0.95654	0.983823	1.05112	0.99716	0.91406	0.0692421
Ciclev10009345m	pacid=20793985 transcript=Ciclev10009345m locus=Ciclev10009010m.g ID=Ciclev10009345m.v1.0 annot-version=v1.0	8.02	2	2	5	237	25.7183	7.63525	1.00333	0.786443	0.759845	0.849872	0.672449	0.618006	0.673401	0.654619	1.29827	0.0694213
Ciclev10009636m	pacid=20793290 transcript=Ciclev10009636m locus=Ciclev10009636m.g ID=Ciclev10009636m.v1.0 annot-version=v1.0	10.81	2	2	13	185	20.6931	10.4917	1.19992	1.0826	1.12095	1.13449	1.08039	0.892035	0.853081	0.941836	1.20455	0.0694734
Ciclev10020436m	pacid=20808507 transcript=Ciclev10020436m locus=Ciclev10020852m.g ID=Ciclev10020436m.v1.0 annot-version=v1.0	4.47	1	2	4	403	45.6588	8.33838		1.33649	1.20277	1.26963		1.0375	0.978965	1.00823	1.25926	0.0698923
Ciclev10031440m	pacid=20804756 transcript=Ciclev10031440m locus=Ciclev10031440m.g ID=Ciclev10031440m.v1.0 annot-version=v1.0	16.09	6	6	33	466	51.4115	9.33447	0.828036	0.91748	0.936054	0.893857	0.94341	1.10591	1.0719	1.04041	0.859141	0.0699868
Ciclev10000783m	pacid=20787633 transcript=Ciclev10000783m locus=Ciclev10000783m.g ID=Ciclev10000783m.v1.0 annot-version=v1.0	34.13	13	15	112	542	60.1696	9.21729	1.29572	1.17213	1.33804	1.26863	1.10436	1.18094	1.11261	1.13264	1.12007	0.0700049
Ciclev10000121m	pacid=20785381 transcript=Ciclev10000121m locus=Ciclev10000121m.g ID=Ciclev10000121m.v1.0 annot-version=v1.0	13.96	13	13	27	1039	115.014	5.35107	0.942941	0.916011	0.876634	0.911862	1.00226	1.00996	0.939842	0.984019	0.926671	0.0700295
Ciclev10011402m	pacid=20797055 transcript=Ciclev10011402m locus=Ciclev10011402m.g ID=Ciclev10011402m.v1.0 annot-version=v1.0	64.62	32	32	549	554	60.9911	6.01123	1.01124	1.00724	0.950564	0.98968	1.02594	1.07908	1.13274	1.07925	0.917004	0.0702837
Ciclev10012559m	pacid=20799001 transcript=Ciclev10012559m locus=Ciclev10012559m.g ID=Ciclev10012559m.v1.0 annot-version=v1.0	48.59	11	11	161	249	27.3518	6.53662	0.831059	0.907257	0.917162	0.885159	0.952328	0.940617	0.980331	0.957759	0.924199	0.0705119
Ciclev10032815m	pacid=20804296 transcript=Ciclev10032815m locus=Ciclev10032815m.g ID=Ciclev10032815m.v1.0 annot-version=v1.0	42.27	6	6	34	194	21.2739	4.99561	0.93443	0.969733		0.952081	1.01349	1.03121		1.02235	0.931264	0.0707117
Ciclev10015053m	pacid=20817205 transcript=Ciclev10015053m locus=Ciclev10015053m.g ID=Ciclev10015053m.v1.0 annot-version=v1.0	28.13	13	13	45	487	55.1416	5.12256	1.03776	1.03498	1.00391	1.02555	1.06305	1.13106	1.21551	1.13654	0.902343	0.0708904
Ciclev10009343m	pacid=20796053 transcript=Ciclev10009343m locus=Ciclev10009343m.g ID=Ciclev10009343m.v1.0 annot-version=v1.0	39.24	8	8	23	237	26.2864	6.11279	0.917244	0.959245	1.042	0.972829	1.04013	1.10599	1.19207	1.11273	0.874273	0.0709499
Ciclev10013066m	pacid=20797910 transcript=Ciclev10013066m locus=Ciclev10013063m.g ID=Ciclev10013066m.v1.0 annot-version=v1.0	18.71	3	3	7	139	15.4377	5.021		0.959486	0.941861	0.950674		1.0666	1.01784	1.04222	0.912161	0.0716915
Ciclev10002673m	pacid=20787363 transcript=Ciclev10002673m locus=Ciclev10002639m.g ID=Ciclev10002673m.v1.0 annot-version=v1.0	24.28	3	3	6	173	19.5118	7.76709	1.03043	1.05577	1.11615	1.06745	0.937739	0.987747	1.02084	0.98211	1.0869	0.0717101
Ciclev10011790m	pacid=20796437 transcript=Ciclev10011790m locus=Ciclev10011790m.g ID=Ciclev10011790m.v1.0 annot-version=v1.0	9.11	3	3	4	428	47.4343	7.75244	1.05956	1.00736		1.03346	0.835381	0.69158		0.76348	1.35362	0.071742
Ciclev10020378m	pacid=20811816 transcript=Ciclev10020378m locus=Ciclev10020378m.g ID=Ciclev10020378m.v1.0 annot-version=v1.0	66.99	16	18	254	412	43.3238	7.72314	1.02508	0.988494	1.01878	1.01079	1.03907	1.07512	1.13189	1.08203	0.93416	0.071743
Ciclev10014323m	pacid=20816310 transcript=Ciclev10014323m locus=Ciclev10014323m.g ID=Ciclev10014323m.v1.0 annot-version=v1.0	1.38	1	1	2	795	87.4062	8.17725	1.47532		1.30707	1.39119	1.09786		1.09036	1.09411	1.27153	0.071798
Ciclev10002349m	pacid=20785469 transcript=Ciclev10002349m locus=Ciclev10002349m.g ID=Ciclev10002349m.v1.0 annot-version=v1.0	9.83	2	2	10	234	26.6315	5.90967	1.33212	1.18982	1.19253	1.23816	1.32346	1.5501	1.4286	1.43405	0.863398	0.0719439
Ciclev10027661m	pacid=20814328 transcript=Ciclev10027661m locus=Ciclev10027661m.g ID=Ciclev10027661m.v1.0 annot-version=v1.0	7.89	17	17	25	2472	278.113	7.07861	1.01747	1.22046	1.05851	1.09881	0.981733	0.916337	0.92191	0.939993	1.16896	0.0721233
Ciclev10021453m	pacid=20807863 transcript=Ciclev10021453m locus=Ciclev10021453m.g ID=Ciclev10021453m.v1.0 annot-version=v1.0	31.4	11	11	64	293	30.3607	10.77	0.817575	0.735571	0.779261	0.777469	0.90314	0.814318	0.870535	0.862664	0.901242	0.0723603
Ciclev10026642m	pacid=20802307 transcript=Ciclev10026642m locus=Ciclev10026642m.g ID=Ciclev10026642m.v1.0 annot-version=v1.0	37.5	1	7	39	168	18.6201	4.56396	0.832685	0.799523		0.816104	0.909489	0.972351		0.94092	0.867347	0.0723716
Ciclev10007810m	pacid=20794716 transcript=Ciclev10007810m locus=Ciclev10007810m.g ID=Ciclev10007810m.v1.0 annot-version=v1.0	48.9	20	26	180	591	65.2889	6.21436	1.13347	1.24379	1.19775	1.19167	1.02947	1.06497	1.14321	1.07922	1.1042	0.0724533
Ciclev10009063m	pacid=20792810 transcript=Ciclev10009063m locus=Ciclev10009063m.g ID=Ciclev10009063m.v1.0 annot-version=v1.0	24.75	6	6	36	295	31.2691	7.12256	1.12855	0.925138	1.13941	1.06437	0.864435	0.840741	0.938239	0.881138	1.20794	0.0725178
Ciclev10016848m	pacid=20818103 transcript=Ciclev10016848m locus=Ciclev10016848m.g ID=Ciclev10016848m.v1.0 annot-version=v1.0	11.7	2	2	6	188	20.9525	8.80713	0.942895	1.03436	0.916094	0.964451	0.867462	0.880576	0.883021	0.87702	1.09969	0.0727522
Ciclev10007834m	pacid=20794541 transcript=Ciclev10007834m locus=Ciclev10007834m.g ID=Ciclev10007834m.v1.0 annot-version=v1.0	52.83	23	23	310	583	60.7983	7.31299	0.981057	0.985493	0.983251	0.983267	0.992732	1.05887	1.06043	1.03734	0.947871	0.0727733
Ciclev10022064m	pacid=20808330 transcript=Ciclev10022064m locus=Ciclev10022064m.g ID=Ciclev10022064m.v1.0 annot-version=v1.0	40.87	7	7	53	230	25.4987	5.04639	1.1102	1.19745	1.15424	1.15397	1.22568	1.25485	1.19862	1.22638	0.94095	0.0730235
Ciclev10021896m	pacid=20808603 transcript=Ciclev10021896m locus=Ciclev10021896m.g ID=Ciclev10021896m.v1.0 annot-version=v1.0	58.94	11	15	116	246	26.843	7.41553	1.01621	1.10058	1.0294	1.04873	0.969345	0.991911	0.988332	0.983196	1.06665	0.0730596
Ciclev10006458m	pacid=20792043 transcript=Ciclev10006458m locus=Ciclev10006458m.g ID=Ciclev10006458m.v1.0 annot-version=v1.0	16.7	6	6	11	521	57.3644	5.8208	1.11344	0.960425	1.04189	1.03858	0.932912	0.877209	0.949117	0.919746	1.12921	0.0734192
Ciclev10009369m	pacid=20793071 transcript=Ciclev10009369m locus=Ciclev10009369m.g ID=Ciclev10009369m.v1.0 annot-version=v1.0	34.48	9	9	62	232	26.5938	5.56689	0.990805	1.079	1.00105	1.02362	1.09925	1.08005	1.09795	1.09242	0.937021	0.0734294
Ciclev10028849m	pacid=20812312 transcript=Ciclev10028849m locus=Ciclev10028849m.g ID=Ciclev10028849m.v1.0 annot-version=v1.0	21	5	5	23	319	35.6467	4.89404	1.08027	1.03844	1.00733	1.04201	0.995235	0.871834	0.776562	0.88121	1.18248	0.0735857
Ciclev10027881m	pacid=20813287 transcript=Ciclev10027881m locus=Ciclev10027881m.g ID=Ciclev10027881m.v1.0 annot-version=v1.0	47.23	30	30	282	741	82.3122	6.21436	1.22989	1.14285	1.17548	1.18274	1.11231	1.12886	1.12043	1.12053	1.05552	0.0737056
Ciclev10002466m	pacid=20787492 transcript=Ciclev10002466m locus=Ciclev10002463m.g ID=Ciclev10002466m.v1.0 annot-version=v1.0	48.58	11	11	52	212	23.8185	7.35693	1.04754	0.939261	0.952895	0.979898	1.0739	1.12112	1.04133	1.07878	0.908335	0.0742497
Ciclev10009278m	pacid=20793842 transcript=Ciclev10009278m locus=Ciclev10009281m.g ID=Ciclev10009278m.v1.0 annot-version=v1.0	39.29	8	8	170	252	26.4461	8.90967	0.939297	0.887213	0.959208	0.928573	1.05083	1.05616	0.957027	1.02134	0.909172	0.0745548
Ciclev10022763m	pacid=20806682 transcript=Ciclev10022763m locus=Ciclev10022763m.g ID=Ciclev10022763m.v1.0 annot-version=v1.0	52.48	5	5	25	141	16.1613	9.14404	1.27686	0.923913	0.861206	1.02066	0.700838	0.740675	0.681632	0.707715	1.44219	0.0745673
Ciclev10032956m	pacid=20804680 transcript=Ciclev10032956m locus=Ciclev10032956m.g ID=Ciclev10032956m.v1.0 annot-version=v1.0	45.28	1	7	91	159	17.3977	5.98584	0.786911	0.913935	0.899989	0.866945	1.05312	0.93959	0.98232	0.991676	0.874222	0.0748036
Ciclev10025610m	pacid=20801675 transcript=Ciclev10025610m locus=Ciclev10025611m.g ID=Ciclev10025610m.v1.0 annot-version=v1.0	47.74	17	17	146	442	50.7276	7.10791	0.958089	0.985625	0.95373	0.965815	1.0034	1.07744	1.00547	1.02877	0.938808	0.0749418
Ciclev10008894m	pacid=20793754 transcript=Ciclev10008894m locus=Ciclev10008685m.g ID=Ciclev10008894m.v1.0 annot-version=v1.0	28.57	10	10	56	329	36.5253	5.65576	1.04039	1.10495	1.05	1.06511	1.03017	0.979231	1.0071	1.0055	1.05929	0.075036
Ciclev10020703m	pacid=20806567 transcript=Ciclev10020703m locus=Ciclev10020221m.g ID=Ciclev10020703m.v1.0 annot-version=v1.0	19.51	8	8	21	369	42.8606	5.30029	1.11887	1.20156	1.03768	1.11937	1.02029	0.968092	1.01152	0.999968	1.11941	0.0752657
Ciclev10022435m	pacid=20810058 transcript=Ciclev10022435m locus=Ciclev10022435m.g ID=Ciclev10022435m.v1.0 annot-version=v1.0	51.87	5	9	185	187	21.0217	10.9604	0.983089	0.950495	0.944573	0.959386	1.02747	1.02401	0.975111	1.00887	0.950956	0.0753111
Ciclev10009894m	pacid=20792782 transcript=Ciclev10009894m locus=Ciclev10009894m.g ID=Ciclev10009894m.v1.0 annot-version=v1.0	44.96	7	7	17	129	14.7585	5.68115	1.05172	1.11096	1.15667	1.10645	0.889383	1.00718	1.03553	0.977365	1.13207	0.0754424
Ciclev10001715m	pacid=20788367 transcript=Ciclev10001715m locus=Ciclev10001715m.g ID=Ciclev10001715m.v1.0 annot-version=v1.0	8.99	2	3	9	345	38.016	9.08545	0.378609	0.417025	0.432202	0.409279	0.750645	0.452233	0.678816	0.627232	0.652516	0.0754509
Ciclev10011522m	pacid=20798015 transcript=Ciclev10011522m locus=Ciclev10011522m.g ID=Ciclev10011522m.v1.0 annot-version=v1.0	16.77	6	6	22	507	55.8746	5.33838	1.2358	1.28474	1.25545	1.25867	1.12764	1.2142	1.02057	1.1208	1.123	0.0754932
Ciclev10002465m	pacid=20787488 transcript=Ciclev10002465m locus=Ciclev10002461m.g ID=Ciclev10002465m.v1.0 annot-version=v1.0	39.62	8	8	64	212	23.3544	8.86572	0.971281	0.901193	0.923044	0.931839	0.997896	0.966318	0.997161	0.987125	0.943993	0.0755125
Ciclev10021700m	pacid=20811058 transcript=Ciclev10021700m locus=Ciclev10021531m.g ID=Ciclev10021700m.v1.0 annot-version=v1.0	19.48	4	4	10	267	29.2958	7.37158	1.5856	1.31649		1.45105	1.11581	0.909554	1.17381	1.06639	1.36071	0.0757707
Ciclev10018800m	pacid=20808464 transcript=Ciclev10018800m locus=Ciclev10018791m.g ID=Ciclev10018800m.v1.0 annot-version=v1.0	10.96	4	7	15	885	96.69	6.62451	1.10835	1.3756	0.968592	1.15085	0.897253	0.783034	0.882525	0.854271	1.34717	0.076081
Ciclev10018026m	pacid=20815314 transcript=Ciclev10018026m locus=Ciclev10018026m.g ID=Ciclev10018026m.v1.0 annot-version=v1.0	7.74	7	7	12	1189	129.578	5.56689		1.04933	1.11521	1.08227		0.929174	0.970307	0.949741	1.13955	0.0761775
Ciclev10014542m	pacid=20818176 transcript=Ciclev10014542m locus=Ciclev10014542m.g ID=Ciclev10014542m.v1.0 annot-version=v1.0	1.53	1	1	3	655	73.2841	5.22412	0.82597	0.922168		0.874069	1.22294	1.08872		1.15583	0.756229	0.0761883
Ciclev10007564m	pacid=20792757 transcript=Ciclev10007564m locus=Ciclev10007564m.g ID=Ciclev10007564m.v1.0 annot-version=v1.0	3.36	3	3	6	745	84.7415	5.65576	0.945148	0.974033	0.903744	0.940975	0.911689	0.757541	0.787879	0.819036	1.14888	0.0765101
Ciclev10012139m	pacid=20798180 transcript=Ciclev10012139m locus=Ciclev10012139m.g ID=Ciclev10012139m.v1.0 annot-version=v1.0	31.86	5	6	17	339	37.3673	9.30518		0.743303	0.667327	0.705315		1.0048	0.885901	0.94535	0.746089	0.0765933
Ciclev10022535m	pacid=20805938 transcript=Ciclev10022535m locus=Ciclev10022535m.g ID=Ciclev10022535m.v1.0 annot-version=v1.0	35.06	6	8	65	174	18.9133	8.67529	1.02607	0.945382	0.95984	0.977096	1.05258	1.04755	1.02105	1.04039	0.939161	0.0767275
Ciclev10026120m	pacid=20801767 transcript=Ciclev10026120m locus=Ciclev10026120m.g ID=Ciclev10026120m.v1.0 annot-version=v1.0	32.27	9	9	61	313	34.4301	7.06396	1.04553	1.02741	0.995566	1.02283	0.990211	0.991156	0.980636	0.987334	1.03596	0.0768879
Ciclev10032592m	pacid=20805864 transcript=Ciclev10032592m locus=Ciclev10032520m.g ID=Ciclev10032592m.v1.0 annot-version=v1.0	4.13	1	1	4	242	26.4964	9.49561	0.867136	0.872855	0.950938	0.896976	0.938776	1.02045	0.986472	0.981899	0.913512	0.0774268
Ciclev10011119m	pacid=20797524 transcript=Ciclev10011119m locus=Ciclev10011119m.g ID=Ciclev10011119m.v1.0 annot-version=v1.0	27.68	20	21	85	773	85.8475	8.86572	0.923209	0.880951	0.96375	0.922637	0.96636	1.07866	1.00992	1.01831	0.906043	0.0774395
Ciclev10028065m	pacid=20814536 transcript=Ciclev10028065m locus=Ciclev10028065m.g ID=Ciclev10028065m.v1.0 annot-version=v1.0	35.91	16	17	78	596	66.7202	6.96143	1.21847	1.0621	1.02504	1.10187	0.992736	0.951817	0.900446	0.948333	1.1619	0.0775136
Ciclev10007516m	pacid=20793416 transcript=Ciclev10007516m locus=Ciclev10007516m.g ID=Ciclev10007516m.v1.0 annot-version=v1.0	10.17	7	7	10	777	87.6483	8.73389	0.906488	0.985332	0.969688	0.953836	1.04954	1.00031	1.13156	1.06047	0.899445	0.0778913
Ciclev10005068m	pacid=20792308 transcript=Ciclev10005068m locus=Ciclev10005068m.g ID=Ciclev10005068m.v1.0 annot-version=v1.0	33.33	10	10	27	414	46.7123	8.55811	1.13442	1.09262	1.19935	1.14213	1.06539	1.03668	1.08429	1.06212	1.07533	0.0782088
Ciclev10000567m	pacid=20786700 transcript=Ciclev10000567m locus=Ciclev10000567m.g ID=Ciclev10000567m.v1.0 annot-version=v1.0	9.89	5	5	13	637	69.6058	9.99365	1.0854	1.003	1.04455	1.04432	0.970469	0.965261	0.827896	0.921209	1.13364	0.0785338
Ciclev10032706m	pacid=20804923 transcript=Ciclev10032706m locus=Ciclev10032706m.g ID=Ciclev10032706m.v1.0 annot-version=v1.0	25.91	2	6	29	220	24.193	5.0083	1.18369	2.29505	2.05605	1.84493	1.18841	0.821899	1.03071	1.01367	1.82005	0.0786866
Ciclev10021021m	pacid=20806630 transcript=Ciclev10021021m locus=Ciclev10021021m.g ID=Ciclev10021021m.v1.0 annot-version=v1.0	25.74	8	8	20	338	38.0023	7.86963	1.02252	0.92782	0.98981	0.980049	1.03964	1.06375	1.15864	1.08734	0.901323	0.0787928
Ciclev10029222m	pacid=20812541 transcript=Ciclev10029222m locus=Ciclev10029222m.g ID=Ciclev10029222m.v1.0 annot-version=v1.0	30.4	6	6	67	227	25.2369	8.77783	1.08264	1.36584	1.32286	1.25711	1.01927	1.07521	1.04677	1.04708	1.20059	0.0789849
Ciclev10000352m	pacid=20788046 transcript=Ciclev10000352m locus=Ciclev10000352m.g ID=Ciclev10000352m.v1.0 annot-version=v1.0	21.91	17	17	79	776	85.0965	8.41162	1.07886	1.3118	1.2704	1.22036	1.03678	1.03684	1.07499	1.04954	1.16276	0.0790159
Ciclev10023400m	pacid=20808961 transcript=Ciclev10023400m locus=Ciclev10023400m.g ID=Ciclev10023400m.v1.0 annot-version=v1.0	4.2	4	5	10	1142	128.167	7.44482	0.97872	1.00297	0.906745	0.962813	0.925195	0.708469	0.709643	0.781102	1.23263	0.0793033
Ciclev10013173m	pacid=20796361 transcript=Ciclev10013173m locus=Ciclev10013173m.g ID=Ciclev10013173m.v1.0 annot-version=v1.0	20.75	2	2	8	106	11.8082	6.771		1.14483	1.0783	1.11156		0.951147	0.998874	0.975011	1.14005	0.0793388
Ciclev10007273m	pacid=20794274 transcript=Ciclev10007273m locus=Ciclev10007273m.g ID=Ciclev10007273m.v1.0 annot-version=v1.0	8.92	9	9	22	1199	133.652	6.46826	0.928291	0.84525	0.902463	0.892001	0.844801	0.817328	0.83297	0.8317	1.0725	0.0795639
Ciclev10025337m	pacid=20800201 transcript=Ciclev10025337m locus=Ciclev10025337m.g ID=Ciclev10025337m.v1.0 annot-version=v1.0	13.53	7	7	22	532	58.2725	7.48877	1.04193	1.0547	0.925447	1.00736	1.07585	1.14069	1.12451	1.11368	0.904531	0.0796825
Ciclev10020914m	pacid=20810644 transcript=Ciclev10020914m locus=Ciclev10020914m.g ID=Ciclev10020914m.v1.0 annot-version=v1.0	33.24	8	8	60	349	37.9422	7.09326	1.0434	1.05811	1.0959	1.0658	1.03178	0.852478	0.935174	0.939811	1.13406	0.0804318
Ciclev10028726m	pacid=20813538 transcript=Ciclev10028726m locus=Ciclev10028726m.g ID=Ciclev10028726m.v1.0 annot-version=v1.0	39.33	13	13	64	356	38.3198	7.69385	0.878788	0.908122	0.893916	0.893609	0.911337	0.94488	0.985559	0.947259	0.943363	0.0806446
Ciclev10014608m	pacid=20818869 transcript=Ciclev10014608m locus=Ciclev10014608m.g ID=Ciclev10014608m.v1.0 annot-version=v1.0	14.9	7	8	16	624	66.6126	6.93213	1.08189	1.02017	1.05537	1.05248	0.994777	1.0046	1.02178	1.00705	1.0451	0.0807167
Ciclev10030105m	pacid=20814327 transcript=Ciclev10030105m locus=Ciclev10030105m.g ID=Ciclev10030105m.v1.0 annot-version=v1.0	5.35	3	3	8	579	65.7618	5.51611		0.773743	0.713409	0.743576		0.847724	0.840205	0.843965	0.881051	0.0807504
Ciclev10005854m	pacid=20792107 transcript=Ciclev10005854m locus=Ciclev10005852m.g ID=Ciclev10005854m.v1.0 annot-version=v1.0	27.4	3	7	56	219	24.6958	8.88037	1.05913	1.10181	1.04225	1.06773	1.02276	1.02938	1.02683	1.02632	1.04035	0.0808947
Ciclev10011686m	pacid=20799044 transcript=Ciclev10011686m locus=Ciclev10011670m.g ID=Ciclev10011686m.v1.0 annot-version=v1.0	47.6	17	17	125	458	50.1944	5.92236	0.9099	0.975836	1.00311	0.962949	0.856502	0.912827	0.894812	0.888047	1.08435	0.0810389
Ciclev10025585m	pacid=20801905 transcript=Ciclev10025585m locus=Ciclev10025585m.g ID=Ciclev10025585m.v1.0 annot-version=v1.0	2.21	1	1	3	452	52.4158	6.97607	1.08034	1.91906	1.62344	1.54095	1.02129	0.968461	0.913473	0.96774	1.59231	0.0815546
Ciclev10007266m	pacid=20794107 transcript=Ciclev10007266m locus=Ciclev10007266m.g ID=Ciclev10007266m.v1.0 annot-version=v1.0	1.27	1	2	3	1255	139.193	6.29053		1.14347	1.08521	1.11434		1.21283	1.25814	1.23548	0.901948	0.081597
Ciclev10032646m	pacid=20805808 transcript=Ciclev10032646m locus=Ciclev10032646m.g ID=Ciclev10032646m.v1.0 annot-version=v1.0	22.51	3	5	17	231	24.9553	5.21143		1.02634	0.869459	0.947898		1.42989	1.24953	1.33971	0.707539	0.0817981
Ciclev10008080m	pacid=20792699 transcript=Ciclev10008080m locus=Ciclev10008080m.g ID=Ciclev10008080m.v1.0 annot-version=v1.0	13.37	5	5	10	501	54.6972	5.71924		1.4904	1.95064	1.72052		0.991049	0.926701	0.958875	1.79432	0.0818105
Ciclev10010975m	pacid=20798739 transcript=Ciclev10010975m locus=Ciclev10010975m.g ID=Ciclev10010975m.v1.0 annot-version=v1.0	31.67	24	26	125	1001	112.767	4.91943	0.950558	1.01577	0.980979	0.982436	1.01424	1.03214	1.05364	1.03334	0.950737	0.0818268
Ciclev10021994m	pacid=20806532 transcript=Ciclev10021994m locus=Ciclev10021994m.g ID=Ciclev10021994m.v1.0 annot-version=v1.0	33.33	6	8	44	237	26.2351	5.17334	1.1791	1.29345	1.14611	1.20622	1.01873	0.973465	1.14857	1.04692	1.15216	0.0818371
Ciclev10011764m	pacid=20798999 transcript=Ciclev10011764m locus=Ciclev10011764m.g ID=Ciclev10011764m.v1.0 annot-version=v1.0	68.89	28	29	420	434	47.1086	6.32861	0.938684	0.984672	0.898964	0.940773	0.97298	1.06162	1.04036	1.02499	0.91784	0.0818806
Ciclev10029672m	pacid=20813444 transcript=Ciclev10029672m locus=Ciclev10029672m.g ID=Ciclev10029672m.v1.0 annot-version=v1.0	19.15	2	2	4	94	10.4685	5.47803	1.17027	1.1337		1.15199	1.06812	1.00947		1.0388	1.10896	0.0819218
Ciclev10031636m	pacid=20805186 transcript=Ciclev10031636m locus=Ciclev10031633m.g ID=Ciclev10031636m.v1.0 annot-version=v1.0	27.42	6	10	66	423	46.6048	5.71924	1.10506	1.1689	1.05656	1.11017	1.0099	1.06002	0.962748	1.01089	1.09822	0.0820132
Ciclev10030393m	pacid=20814046 transcript=Ciclev10030393m locus=Ciclev10030393m.g ID=Ciclev10030393m.v1.0 annot-version=v1.0	31.15	12	14	68	565	64.6625	6.41748	1.00417	0.847477	0.903146	0.918265	1.13917	1.01763	1.02006	1.05895	0.867144	0.0821191
Ciclev10029619m	pacid=20813697 transcript=Ciclev10029619m locus=Ciclev10029621m.g ID=Ciclev10029619m.v1.0 annot-version=v1.0	62.5	3	6	215	112	11.3397	4.33545	1.05935	1.19258	1.20133	1.15108	0.987778	1.08494	0.996589	1.0231	1.12509	0.0821406
Ciclev10009426m	pacid=20793198 transcript=Ciclev10009426m locus=Ciclev10009426m.g ID=Ciclev10009426m.v1.0 annot-version=v1.0	25.34	6	6	110	221	25.0326	6.85889	0.918088	0.837269	0.884465	0.87994	1.04103	0.923561	0.963648	0.97608	0.901505	0.0823858
Ciclev10008859m	pacid=20793389 transcript=Ciclev10008859m locus=Ciclev10008736m.g ID=Ciclev10008859m.v1.0 annot-version=v1.0	19.88	5	5	32	337	37.3985	5.09717	0.98297	0.913822	1.10365	1.00015	0.855089	0.890577	0.864104	0.869923	1.1497	0.0824279
Ciclev10012179m	pacid=20796807 transcript=Ciclev10012179m locus=Ciclev10012179m.g ID=Ciclev10012179m.v1.0 annot-version=v1.0	20.18	4	4	9	327	36.8435	8.19189	0.994513	1.50699	1.3081	1.26987	0.9973	0.903474	0.820789	0.907188	1.39978	0.0828802
Ciclev10004844m	pacid=20792179 transcript=Ciclev10004844m locus=Ciclev10004844m.g ID=Ciclev10004844m.v1.0 annot-version=v1.0	39.26	8	15	163	489	53.1786	6.85889	0.865972	0.920273	0.927977	0.904741	0.929718	1.00505	0.984749	0.973172	0.929682	0.0831597
Ciclev10004800m	pacid=20791404 transcript=Ciclev10004800m locus=Ciclev10004800m.g ID=Ciclev10004800m.v1.0 annot-version=v1.0	35.84	17	17	79	505	54.2533	5.70654	0.954389	0.898491	1.0022	0.951692	0.990425	1.06885	1.07211	1.04379	0.911762	0.0834269
Ciclev10025400m	pacid=20799724 transcript=Ciclev10025400m locus=Ciclev10025400m.g ID=Ciclev10025400m.v1.0 annot-version=v1.0	49.8	23	23	315	510	56.3558	5.77002	0.985281	1.01508	0.930295	0.976885	1.00555	1.17197	1.15546	1.11099	0.87929	0.083524
Ciclev10025846m	pacid=20799406 transcript=Ciclev10025846m locus=Ciclev10025846m.g ID=Ciclev10025846m.v1.0 annot-version=v1.0	19.26	7	7	35	379	43.1619	6.88818	1.04138	0.985716	1.02142	1.01617	1.1179	1.15392	1.03785	1.10322	0.921093	0.0836076
Ciclev10015664m	pacid=20819094 transcript=Ciclev10015664m locus=Ciclev10015533m.g ID=Ciclev10015664m.v1.0 annot-version=v1.0	33.42	10	11	70	371	40.8102	8.80713	1.06043	1.08758	1.1364	1.0948	1.22313	1.22785	1.1199	1.19029	0.919778	0.083614
Ciclev10004445m	pacid=20789699 transcript=Ciclev10004445m locus=Ciclev10004445m.g ID=Ciclev10004445m.v1.0 annot-version=v1.0	1.4	1	1	5	715	78.9478	8.48486	1.25926	1.254	1.14932	1.22086	0.966969	1.13101	1.12286	1.07361	1.13715	0.0837641
Ciclev10004661m	pacid=20791414 transcript=Ciclev10004661m locus=Ciclev10004661m.g ID=Ciclev10004661m.v1.0 annot-version=v1.0	60.32	5	28	226	557	60.3685	6.21436	0.845813	0.948409	0.908588	0.900937	0.942854	1.02395	1.08403	1.01695	0.885924	0.0838042
Ciclev10007944m	pacid=20794675 transcript=Ciclev10007944m locus=Ciclev10007944m.g ID=Ciclev10007944m.v1.0 annot-version=v1.0	13.15	6	6	12	540	61.1716	5.38916	1.05936	1.10336	0.97045	1.04439	1.14814	1.12021	1.139	1.13578	0.919533	0.0840569
Ciclev10022164m	pacid=20810119 transcript=Ciclev10022164m locus=Ciclev10022164m.g ID=Ciclev10022164m.v1.0 annot-version=v1.0	41.1	7	13	67	219	25.4701	7.18115	1.25836	1.24929	1.20346	1.23704	1.27981	1.39975	1.51851	1.39936	0.884004	0.0841177
Ciclev10004208m	pacid=20790858 transcript=Ciclev10004208m locus=Ciclev10004208m.g ID=Ciclev10004208m.v1.0 annot-version=v1.0	34.06	35	35	171	1107	125.963	7.18115	0.884667	0.834344	0.882028	0.867013	0.969941	1.00444	0.888193	0.954192	0.908635	0.0843149
Ciclev10016421m	pacid=20815659 transcript=Ciclev10016421m locus=Ciclev10016399m.g ID=Ciclev10016421m.v1.0 annot-version=v1.0	39.43	6	8	19	246	26.8294	5.30029	1.02607	1.01252	1.02795	1.02218	0.989187	0.733685	0.833186	0.852019	1.19971	0.0844539
Ciclev10024153m	pacid=20806667 transcript=Ciclev10024153m locus=Ciclev10024153m.g ID=Ciclev10024153m.v1.0 annot-version=v1.0	3.28	1	1	2	244	27.3493	9.59814		1.04766	1.10172	1.07469		1.15779	1.1694	1.16359	0.923597	0.0846173
Ciclev10015368m	pacid=20815192 transcript=Ciclev10015368m locus=Ciclev10015368m.g ID=Ciclev10015368m.v1.0 annot-version=v1.0	29.05	11	11	41	420	46.2855	6.55127	1.09549	1.17017	1.18648	1.15071	1.05293	1.03485	1.11326	1.06701	1.07844	0.0846968
Ciclev10010915m	pacid=20799038 transcript=Ciclev10010915m locus=Ciclev10010914m.g ID=Ciclev10010915m.v1.0 annot-version=v1.0	32.7	39	39	88	1376	154.672	4.71631	1.02802	0.984927	1.03168	1.01488	1.03656	1.10452	1.14804	1.09637	0.925668	0.0847844
Ciclev10030605m	pacid=20804696 transcript=Ciclev10030605m locus=Ciclev10030605m.g ID=Ciclev10030605m.v1.0 annot-version=v1.0	37.12	17	30	237	1021	115.871	6.7124	0.773627	0.832268	0.85752	0.821139	0.906457	0.861959	0.972174	0.91353	0.898864	0.0847986
Ciclev10000024m	pacid=20787556 transcript=Ciclev10000024m locus=Ciclev10000024m.g ID=Ciclev10000024m.v1.0 annot-version=v1.0	29.28	42	42	166	1646	185.811	5.85889	1.01718	0.989813	0.96825	0.991749	1.01694	1.04342	1.08983	1.05006	0.944467	0.0848196
Ciclev10014821m	pacid=20816488 transcript=Ciclev10014821m locus=Ciclev10014821m.g ID=Ciclev10014821m.v1.0 annot-version=v1.0	4.59	2	2	8	545	57.8258	7.48877	1.01134	1.09462	1.10314	1.0697	0.970466	0.855886	1.00941	0.945253	1.13165	0.0848414
Ciclev10021490m	pacid=20811990 transcript=Ciclev10021490m locus=Ciclev10021490m.g ID=Ciclev10021490m.v1.0 annot-version=v1.0	4.17	1	1	4	288	32.4425	6.27783	1.34235	1.35038	1.09021	1.26098	1.15471	0.924292	0.877975	0.985659	1.27933	0.0850635
Ciclev10009082m	pacid=20794367 transcript=Ciclev10009082m locus=Ciclev10009082m.g ID=Ciclev10009082m.v1.0 annot-version=v1.0	16.84	4	4	16	291	32.5982	6.99072	0.837605	0.994599	1.08414	0.972115	0.717095	0.7333	0.871644	0.774013	1.25594	0.0854488
Ciclev10018954m	pacid=20808518 transcript=Ciclev10018954m locus=Ciclev10018944m.g ID=Ciclev10018954m.v1.0 annot-version=v1.0	18.97	11	11	33	775	86.0678	5.33838	0.905202	0.960146	0.872339	0.912562	0.954659	1.0608	0.995786	1.00375	0.909155	0.0855314
Ciclev10012166m	pacid=20798963 transcript=Ciclev10012166m locus=Ciclev10012166m.g ID=Ciclev10012166m.v1.0 annot-version=v1.0	64.05	17	17	169	331	35.9848	9.39307	1.04167	1.09883	1.13422	1.09158	1.0162	1.03899	1.0306	1.0286	1.06123	0.0859361
Ciclev10016657m	pacid=20817127 transcript=Ciclev10016657m locus=Ciclev10016439m.g ID=Ciclev10016657m.v1.0 annot-version=v1.0	5.56	1	1	9	216	24.5484	6.52197	0.562298	0.682987	0.571037	0.605441	0.473997	0.506922	0.540535	0.507151	1.19381	0.0859475
Ciclev10027108m	pacid=20801556 transcript=Ciclev10027108m locus=Ciclev10027108m.g ID=Ciclev10027108m.v1.0 annot-version=v1.0	30.47	8	8	38	361	40.4517	8.52881	1.10918	1.07677	1.1324	1.10612	1.15972	1.30176	1.17858	1.21335	0.911621	0.0863107
Ciclev10002629m	pacid=20785762 transcript=Ciclev10002629m locus=Ciclev10002629m.g ID=Ciclev10002629m.v1.0 annot-version=v1.0	27.47	4	4	9	182	20.7764	5.21143	1.05691	1.31222	1.30788	1.22567	1.09372	0.949284	0.991277	1.01143	1.21182	0.0863823
Ciclev10012397m	pacid=20798317 transcript=Ciclev10012397m locus=Ciclev10012397m.g ID=Ciclev10012397m.v1.0 annot-version=v1.0	4.23	1	1	2	284	30.664	6.91748	0.877364	0.80224		0.839802	1.0373	0.967662		1.00248	0.837722	0.0864643
Ciclev10011605m	pacid=20798288 transcript=Ciclev10011605m locus=Ciclev10011605m.g ID=Ciclev10011605m.v1.0 annot-version=v1.0	10.91	5	5	7	486	54.9608	8.98291	0.802084	0.956286	0.864775	0.874382	0.96272	0.995103	0.975779	0.977867	0.894173	0.0864924
Ciclev10007345m	pacid=20796004 transcript=Ciclev10007345m locus=Ciclev10007345m.g ID=Ciclev10007345m.v1.0 annot-version=v1.0	6.1	5	5	11	984	109.667	8.48486	0.987834	0.970009		0.978922	1.04723	1.10623		1.07673	0.90916	0.0865766
Ciclev10019938m	pacid=20810555 transcript=Ciclev10019938m locus=Ciclev10019938m.g ID=Ciclev10019938m.v1.0 annot-version=v1.0	31.87	13	14	122	480	51.7604	9.40771	1.0716	1.08458	1.13219	1.09613	1.03253	1.06576	1.0493	1.0492	1.04473	0.0867073
Ciclev10000035m	pacid=20786089 transcript=Ciclev10000035m locus=Ciclev10000035m.g ID=Ciclev10000035m.v1.0 annot-version=v1.0	4.32	5	5	9	1342	146.463	7.81104	0.985181		0.92923	0.957205	1.05578		1.04154	1.04866	0.912789	0.0868566
Ciclev10004540m	pacid=20790149 transcript=Ciclev10004540m locus=Ciclev10004414m.g ID=Ciclev10004540m.v1.0 annot-version=v1.0	17.35	8	8	21	634	70.3038	5.13525	0.92924	0.9848		0.95702	1.11608	1.10248	1.01037	1.07631	0.889166	0.0872445
Ciclev10013675m	pacid=20796440 transcript=Ciclev10013675m locus=Ciclev10013675m.g ID=Ciclev10013675m.v1.0 annot-version=v1.0	7.95	3	3	4	302	34.1812	9.05615	1.10962	1.16867	1.06203	1.11344	1.02836	1.03056	0.873435	0.977452	1.13913	0.0877554
Ciclev10004654m	pacid=20790922 transcript=Ciclev10004654m locus=Ciclev10004654m.g ID=Ciclev10004654m.v1.0 annot-version=v1.0	1.78	1	1	2	561	62.9642	6.59521	0.881248		0.975301	0.928274	0.78345		0.776061	0.779756	1.19047	0.0877961
Ciclev10021037m	pacid=20811377 transcript=Ciclev10021037m locus=Ciclev10021037m.g ID=Ciclev10021037m.v1.0 annot-version=v1.0	68.55	14	22	1227	337	36.6601	7.95752	0.946512	0.951691	0.964378	0.954194	0.969024	1.11527	1.14023	1.07484	0.887753	0.0878029
Ciclev10033885m	pacid=20803060 transcript=Ciclev10033885m locus=Ciclev10033885m.g ID=Ciclev10033885m.v1.0 annot-version=v1.0	2.09	2	2	5	1197	132.875	6.58057	1.05571	1.16455		1.11013	0.928712	0.830589		0.87965	1.26201	0.0879405
Ciclev10027859m	pacid=20814815 transcript=Ciclev10027859m locus=Ciclev10027859m.g ID=Ciclev10027859m.v1.0 annot-version=v1.0	21.95	14	14	99	779	82.0488	8.25049	0.964143	1.05468	1.0527	1.02384	0.890026	0.922152	0.984571	0.93225	1.09825	0.0879475
Ciclev10005152m	pacid=20790109 transcript=Ciclev10005152m locus=Ciclev10005152m.g ID=Ciclev10005152m.v1.0 annot-version=v1.0	16.41	4	4	28	384	42.4858	8.41162	1.31019	1.43777	1.20232	1.31676	1.0125	1.16894	1.18201	1.12115	1.17447	0.0881999
Ciclev10019196m	pacid=20810759 transcript=Ciclev10019196m locus=Ciclev10019196m.g ID=Ciclev10019196m.v1.0 annot-version=v1.0	31.63	19	19	101	664	74.0166	7.50342	1.01899	0.961302	1.03695	1.00575	1.03886	1.14038	1.21617	1.1318	0.888624	0.088354
Ciclev10026333m	pacid=20799966 transcript=Ciclev10026333m locus=Ciclev10026333m.g ID=Ciclev10026333m.v1.0 annot-version=v1.0	13.15	1	3	33	251	27.4879	10.3599	1.15142	1.32746	1.09466	1.19118	1.07173	1.00015	1.00615	1.02601	1.16099	0.0886201
Ciclev10019993m	pacid=20811656 transcript=Ciclev10019993m locus=Ciclev10019993m.g ID=Ciclev10019993m.v1.0 annot-version=v1.0	9.28	3	3	5	474	52.9993	5.23682		0.898609	1.00617	0.952391		0.790892	0.736621	0.763757	1.24698	0.0886341
Ciclev10014284m	pacid=20816532 transcript=Ciclev10014284m locus=Ciclev10014271m.g ID=Ciclev10014284m.v1.0 annot-version=v1.0	3.89	2	3	15	822	90.5256	4.61475	0.91671	0.981407		0.949059	1.07663	1.04584		1.06124	0.894295	0.0886424
Ciclev10022799m	pacid=20808110 transcript=Ciclev10022799m locus=Ciclev10022799m.g ID=Ciclev10022799m.v1.0 annot-version=v1.0	40.44	5	5	68	136	14.9471	9.0415	1.09435	1.15854	1.20919	1.15403	1.01761	1.09743	1.07319	1.06274	1.0859	0.0887386
Ciclev10011723m	pacid=20796428 transcript=Ciclev10011723m locus=Ciclev10011723m.g ID=Ciclev10011723m.v1.0 annot-version=v1.0	50.79	3	18	631	445	50.1468	4.91943	0.868789	0.833611	0.710804	0.804401	1.05255	0.887722	0.933211	0.957829	0.839818	0.0890301
Ciclev10028028m	pacid=20812861 transcript=Ciclev10028028m locus=Ciclev10028028m.g ID=Ciclev10028028m.v1.0 annot-version=v1.0	18.46	11	11	35	623	70.1808	7.12256	1.09614	1.12915	1.03561	1.08697	1.0361	0.991631	1.02789	1.01854	1.06718	0.0890623
Ciclev10014499m	pacid=20818471 transcript=Ciclev10014499m locus=Ciclev10014454m.g ID=Ciclev10014499m.v1.0 annot-version=v1.0	8.93	5	5	9	672	73.0528	7.37158	1.02201	1.21041	1.119	1.11714	0.888501	1.01649	0.995365	0.966786	1.15552	0.0891717
Ciclev10026726m	pacid=20801518 transcript=Ciclev10026726m locus=Ciclev10026727m.g ID=Ciclev10026726m.v1.0 annot-version=v1.0	42.55	5	5	56	141	14.7975	6.26514	1.01654	1.05125	0.987318	1.01837	0.963326	0.967741	0.862244	0.931103	1.09372	0.0893995
Ciclev10020516m	pacid=20808568 transcript=Ciclev10020516m locus=Ciclev10019805m.g ID=Ciclev10020516m.v1.0 annot-version=v1.0	13.27	5	5	10	392	44.7102	8.54346		0.864145	0.809708	0.836926		1.07858	0.97092	1.02475	0.816711	0.0895107
Ciclev10000842m	pacid=20786264 transcript=Ciclev10000842m locus=Ciclev10000842m.g ID=Ciclev10000842m.v1.0 annot-version=v1.0	42.02	16	16	73	526	57.8813	7.82568	0.974734	0.972355	0.926825	0.957971	1.01364	1.15824	1.0275	1.06646	0.898274	0.0895308
Ciclev10014068m	pacid=20819285 transcript=Ciclev10014068m locus=Ciclev10014068m.g ID=Ciclev10014068m.v1.0 annot-version=v1.0	4.82	4	4	6	1223	137.35	7.37158	0.921536	1.14821	0.972577	1.01411	0.928682	0.769153	0.701584	0.799806	1.26794	0.0897393
Ciclev10009018m	pacid=20795303 transcript=Ciclev10009018m locus=Ciclev10009018m.g ID=Ciclev10009018m.v1.0 annot-version=v1.0	7.89	2	2	5	304	33.8189	8.38232		0.969256	0.985702	0.977479		0.910943	0.940098	0.925521	1.05614	0.0899762
Ciclev10020004m	pacid=20811008 transcript=Ciclev10020004m locus=Ciclev10020004m.g ID=Ciclev10020004m.v1.0 annot-version=v1.0	43.76	17	17	181	473	51.2468	6.53662	1.29638	1.14162	1.29487	1.24429	1.0933	1.14185	1.13921	1.12479	1.10624	0.0900803
Ciclev10019655m	pacid=20807760 transcript=Ciclev10019655m locus=Ciclev10019655m.g ID=Ciclev10019655m.v1.0 annot-version=v1.0	7.66	3	3	7	535	60.4178	8.68994	1.34517	1.32542	1.03281	1.23447	0.990878	0.771445	1.05579	0.939371	1.31414	0.0901712
Ciclev10031821m	pacid=20805442 transcript=Ciclev10031821m locus=Ciclev10031821m.g ID=Ciclev10031821m.v1.0 annot-version=v1.0	29.13	8	9	26	381	40.8112	5.49072	1.06343	1.00102	0.9711	1.01185	0.959801	0.944915	0.946781	0.950499	1.06455	0.0903058
Ciclev10002215m	pacid=20787585 transcript=Ciclev10002215m locus=Ciclev10002215m.g ID=Ciclev10002215m.v1.0 annot-version=v1.0	26.74	4	4	27	258	28.0666	6.94678	0.948325	1.06102	0.979828	0.996392	1.08222	1.12653	1.04927	1.08601	0.91748	0.0905023
Ciclev10019420m	pacid=20809490 transcript=Ciclev10019420m locus=Ciclev10019420m.g ID=Ciclev10019420m.v1.0 annot-version=v1.0	26.44	12	13	43	590	64.5628	5.60498	1.1402	1.56792	1.17004	1.29272	1.01234	0.925613	1.00372	0.98056	1.31835	0.0905944
Ciclev10028047m	pacid=20814402 transcript=Ciclev10028047m locus=Ciclev10027943m.g ID=Ciclev10028047m.v1.0 annot-version=v1.0	56.34	23	39	507	607	65.3418	5.37646	0.923259	0.965268	0.932988	0.940505	0.961436	0.972609	0.996506	0.97685	0.962793	0.0906714
Ciclev10002609m	pacid=20786132 transcript=Ciclev10002609m locus=Ciclev10002515m.g ID=Ciclev10002609m.v1.0 annot-version=v1.0	32.43	5	5	67	185	20.7115	6.75635	1.05415	1.03338		1.04376	0.978169	0.92074		0.949454	1.09933	0.0907855
Ciclev10008710m	pacid=20794325 transcript=Ciclev10008710m locus=Ciclev10008710m.g ID=Ciclev10008710m.v1.0 annot-version=v1.0	29.23	10	10	83	366	40.1529	8.41162	1.07519	1.02682	1.04989	1.05063	1.03628	0.965144	0.946897	0.982772	1.06905	0.0911107
Ciclev10033134m	pacid=20803938 transcript=Ciclev10033134m locus=Ciclev10033078m.g ID=Ciclev10033134m.v1.0 annot-version=v1.0	8.41	1	1	15	107	11.3858	7.54736	1.01106	1.05044	1.11958	1.06036	0.672564	0.840755	1.00235	0.838558	1.26451	0.0915998
Ciclev10001991m	pacid=20787158 transcript=Ciclev10001991m locus=Ciclev10001991m.g ID=Ciclev10001991m.v1.0 annot-version=v1.0	28.24	8	8	42	301	33.6157	8.27979	0.957931	0.779187	0.839002	0.858707	0.976897	0.959494	0.993877	0.976756	0.879142	0.091816
Ciclev10027981m	pacid=20813869 transcript=Ciclev10027981m locus=Ciclev10027981m.g ID=Ciclev10027981m.v1.0 annot-version=v1.0	59.63	7	35	811	649	70.982	5.21143	1.0236	1.07095	1.0808	1.05845	1.01665	0.933419	1.01214	0.987403	1.07195	0.0925543
Ciclev10009312m	pacid=20796106 transcript=Ciclev10009312m locus=Ciclev10009162m.g ID=Ciclev10009312m.v1.0 annot-version=v1.0	58.85	13	21	315	243	28.2115	9.86182	0.941198	0.957379	0.931306	0.943295	0.926608	0.909998	0.868318	0.901641	1.0462	0.0926173
Ciclev10020238m	pacid=20811741 transcript=Ciclev10020238m locus=Ciclev10020238m.g ID=Ciclev10020238m.v1.0 annot-version=v1.0	12.79	5	5	27	430	47.0521	8.27979	0.971093	1.06124	0.991479	1.00794	1.11333	1.06232	1.06094	1.07887	0.934255	0.0929285
Ciclev10011693m	pacid=20798612 transcript=Ciclev10011693m locus=Ciclev10011693m.g ID=Ciclev10011693m.v1.0 annot-version=v1.0	18.86	6	6	28	456	51.7692	4.98291	1.26832	1.08777	1.29572	1.21727	1.1028	1.01845	1.07117	1.06414	1.1439	0.0930274
Ciclev10031103m	pacid=20802935 transcript=Ciclev10031103m locus=Ciclev10030984m.g ID=Ciclev10031103m.v1.0 annot-version=v1.0	26.63	16	16	98	567	65.8587	8.48486	0.86215	0.913829	0.827938	0.867972	0.906469	0.930949	0.959773	0.932397	0.930904	0.0930497
Ciclev10021907m	pacid=20808658 transcript=Ciclev10021907m locus=Ciclev10021907m.g ID=Ciclev10021907m.v1.0 annot-version=v1.0	15.92	4	4	17	245	27.2762	9.45166	0.891078	0.818784	0.949796	0.886553	1.00758	0.965434	0.956758	0.976591	0.907803	0.0931174
Ciclev10021986m	pacid=20806985 transcript=Ciclev10021986m locus=Ciclev10021986m.g ID=Ciclev10021986m.v1.0 annot-version=v1.0	23.11	4	4	10	238	25.8555	8.04541	0.833459	0.914775	1.02668	0.924971	1.02746	1.04245	1.10725	1.05906	0.873392	0.0933216
Ciclev10009994m	pacid=20795767 transcript=Ciclev10009994m locus=Ciclev10009994m.g ID=Ciclev10009994m.v1.0 annot-version=v1.0	58.25	7	7	340	103	11.4024	11.4731	0.931629	0.990136	1.03637	0.986046	0.901622	0.921944	0.928441	0.917336	1.0749	0.0936161
Ciclev10010514m	pacid=20793878 transcript=Ciclev10010514m locus=Ciclev10010514m.g ID=Ciclev10010514m.v1.0 annot-version=v1.0	35.38	12	12	61	489	53.1113	6.80029	1.0375	1.04153	0.997182	1.0254	1.03851	1.10927	1.12031	1.08936	0.941287	0.0942451
Ciclev10014780m	pacid=20818193 transcript=Ciclev10014780m locus=Ciclev10014771m.g ID=Ciclev10014780m.v1.0 annot-version=v1.0	61.94	28	28	284	557	60.0811	7.06396	0.93973	0.84996	0.92447	0.90472	1.001	0.939101	0.999767	0.979956	0.923225	0.094298
Ciclev10001538m	pacid=20789257 transcript=Ciclev10001538m locus=Ciclev10001538m.g ID=Ciclev10001538m.v1.0 annot-version=v1.0	2.68	1	1	2	373	41.3961	5.74463		1.11823	1.19209	1.15516		1.04182	1.04522	1.04352	1.10698	0.0943788
Ciclev10014816m	pacid=20815942 transcript=Ciclev10014816m locus=Ciclev10014816m.g ID=Ciclev10014816m.v1.0 annot-version=v1.0	41.94	12	22	202	546	61.4583	8.55811	0.991802	0.99499	0.92201	0.9696	1.01783	1.05115	1.0139	1.02763	0.943533	0.0944426
Ciclev10025659m	pacid=20800055 transcript=Ciclev10025659m locus=Ciclev10025659m.g ID=Ciclev10025659m.v1.0 annot-version=v1.0	36.74	16	16	180	430	47.66	8.29443	0.946654	0.988805	0.962839	0.9661	0.998063	0.995406	1.05478	1.01608	0.950807	0.0947421
Ciclev10028375m	pacid=20812719 transcript=Ciclev10028375m locus=Ciclev10028375m.g ID=Ciclev10028375m.v1.0 annot-version=v1.0	23.82	10	10	68	466	52.2147	5.99854	0.855012	0.89527	0.882704	0.877662	0.848907	0.852439	0.80442	0.835256	1.05077	0.0952809
Ciclev10000452m	pacid=20786470 transcript=Ciclev10000452m locus=Ciclev10000347m.g ID=Ciclev10000452m.v1.0 annot-version=v1.0	4.97	3	3	10	704	79.7765	6.93213	1.07895	1.09415	1.02826	1.06712	1.08668	1.16142	1.1807	1.14293	0.933671	0.0956626
Ciclev10015790m	pacid=20818412 transcript=Ciclev10015790m locus=Ciclev10015790m.g ID=Ciclev10015790m.v1.0 annot-version=v1.0	54.96	4	10	140	242	26.4235	9.48096	1.2144	1.17549	1.39069	1.26019	1.35336	1.76766	1.54916	1.55672	0.809516	0.0959858
Ciclev10032123m	pacid=20803740 transcript=Ciclev10032123m locus=Ciclev10032123m.g ID=Ciclev10032123m.v1.0 annot-version=v1.0	26.4	8	8	21	322	34.8092	8.104	1.14677	1.06185	1.2586	1.15574	1.2393	1.30496	1.34059	1.29495	0.892498	0.0961082
Ciclev10000371m	pacid=20788376 transcript=Ciclev10000371m locus=Ciclev10000298m.g ID=Ciclev10000371m.v1.0 annot-version=v1.0	14.57	10	10	28	762	86.2552	5.89697	1.05737	1.20551	1.02616	1.09634	1.24785	1.37465	1.18111	1.26787	0.864712	0.0964449
Ciclev10030299m	pacid=20812299 transcript=Ciclev10030299m locus=Ciclev10030299m.g ID=Ciclev10030299m.v1.0 annot-version=v1.0	7.21	1	2	12	416	45.6651	5.63037	0.902524	0.940533	0.846159	0.896405	0.990968	0.953093	0.945046	0.963036	0.930812	0.096944
Ciclev10005806m	pacid=20790033 transcript=Ciclev10005806m locus=Ciclev10005797m.g ID=Ciclev10005806m.v1.0 annot-version=v1.0	15.35	3	3	14	228	25.4279	4.09424	0.993732	1.39468	1.27372	1.22071	1.06056	0.862156	0.856004	0.926239	1.31792	0.0970587
Ciclev10014196m	pacid=20818257 transcript=Ciclev10014196m locus=Ciclev10014196m.g ID=Ciclev10014196m.v1.0 annot-version=v1.0	12.65	9	10	30	901	101.212	8.11865		1.31261	1.38377	1.34819		1.15767	1.23249	1.19508	1.12812	0.0973871
Ciclev10028024m	pacid=20813956 transcript=Ciclev10028024m locus=Ciclev10027972m.g ID=Ciclev10028024m.v1.0 annot-version=v1.0	19.1	11	11	37	623	69.5385	5.46533	1.02362	1.05325	1.09973	1.05887	1.12144	1.0916	1.17178	1.12828	0.938483	0.0974946
Ciclev10008734m	pacid=20793736 transcript=Ciclev10008734m locus=Ciclev10008655m.g ID=Ciclev10008734m.v1.0 annot-version=v1.0	14.4	4	4	24	361	40.499	10.814	1.11672	1.26663	2.18206	1.5218	0.919408	0.782349	0.660992	0.787583	1.93224	0.0977875
Ciclev10013168m	pacid=20798707 transcript=Ciclev10013168m locus=Ciclev10013168m.g ID=Ciclev10013168m.v1.0 annot-version=v1.0	43.64	5	5	49	110	12.3545	9.08545	1.06983	1.18413	1.11236	1.12211	0.981932	1.05958	1.0551	1.0322	1.0871	0.0978034
Ciclev10025894m	pacid=20800525 transcript=Ciclev10025894m locus=Ciclev10025894m.g ID=Ciclev10025894m.v1.0 annot-version=v1.0	31.44	10	10	36	369	41.2848	8.54346	0.769604	0.920679	0.914606	0.868297	0.933692	1.00805	1.06416	1.00197	0.866592	0.0979935
Ciclev10002110m	pacid=20786229 transcript=Ciclev10002110m locus=Ciclev10002110m.g ID=Ciclev10002110m.v1.0 annot-version=v1.0	63.44	16	16	160	279	30.143	5.2749	0.947182	0.911759	1.00376	0.954233	0.999182	1.02279	1.02007	1.01401	0.941045	0.0980211
Ciclev10014778m	pacid=20817798 transcript=Ciclev10014778m locus=Ciclev10014778m.g ID=Ciclev10014778m.v1.0 annot-version=v1.0	30.88	15	15	51	557	61.2497	6.7417	1.00318	0.998942	0.952546	0.984889	1.00057	1.05683	1.07158	1.04299	0.944291	0.0980866
Ciclev10021297m	pacid=20809373 transcript=Ciclev10021297m locus=Ciclev10021036m.g ID=Ciclev10021297m.v1.0 annot-version=v1.0	11.36	2	3	14	308	33.3971	8.49951	1.06026	1.08768	1.07795	1.07529	1.11687	1.1985	1.10584	1.1404	0.942907	0.0981482
Ciclev10020856m	pacid=20806336 transcript=Ciclev10020856m locus=Ciclev10020846m.g ID=Ciclev10020856m.v1.0 annot-version=v1.0	24.58	4	8	25	354	38.4113	9.40771	1.11134	1.40453	1.1165	1.21079	1.07769	0.950701	0.861269	0.963221	1.25702	0.0986008
Ciclev10010323m	pacid=20795560 transcript=Ciclev10010323m locus=Ciclev10010323m.g ID=Ciclev10010323m.v1.0 annot-version=v1.0	45.53	6	11	104	235	26.2433	6.87354	0.930541	1.08481	1.03932	1.01822	0.879565	0.920243	0.939397	0.913068	1.11517	0.0986526
Ciclev10019376m	pacid=20807998 transcript=Ciclev10019376m locus=Ciclev10019376m.g ID=Ciclev10019376m.v1.0 annot-version=v1.0	10.76	6	8	16	604	66.2205	8.04541	1.21889	1.24726	1.50082	1.32232	1.12453	0.998737	1.17565	1.09964	1.2025	0.0987314
Ciclev10027640m	pacid=20802313 transcript=Ciclev10027640m locus=Ciclev10027640m.g ID=Ciclev10027640m.v1.0 annot-version=v1.0	10.89	9	10	19	992	118.872	9.84717	0.991553	0.819746	0.971937	0.927745	1.0813	1.08546	1.00428	1.05701	0.877704	0.098952
Ciclev10007714m	pacid=20794134 transcript=Ciclev10007714m locus=Ciclev10007714m.g ID=Ciclev10007714m.v1.0 annot-version=v1.0	18.94	12	12	38	644	70.8956	8.29443	0.975706	0.954657	1.02085	0.983738	1.00553	1.07036	1.05139	1.04242	0.943702	0.0990234
Ciclev10022652m	pacid=20810486 transcript=Ciclev10022652m locus=Ciclev10022652m.g ID=Ciclev10022652m.v1.0 annot-version=v1.0	61.94	1	7	98	155	17.3014	10.5356	0.979127	0.954293	0.989863	0.974428	0.958262	0.899498	0.844772	0.900844	1.08168	0.0993336
Ciclev10020733m	pacid=20811971 transcript=Ciclev10020733m locus=Ciclev10020733m.g ID=Ciclev10020733m.v1.0 annot-version=v1.0	44.93	12	12	67	365	41.4578	4.66553	0.99705	0.93953	1.02199	0.986189	1.02778	1.04889	1.12128	1.06598	0.925146	0.0997221
Ciclev10009933m	pacid=20793972 transcript=Ciclev10009933m locus=Ciclev10009930m.g ID=Ciclev10009933m.v1.0 annot-version=v1.0	40.34	6	6	63	119	13.7496	10.4624	0.950055	0.942426	1.07998	0.99082	0.905663	0.904345	0.86327	0.891093	1.11192	0.0998637
Ciclev10023728m	pacid=20811618 transcript=Ciclev10023728m locus=Ciclev10023728m.g ID=Ciclev10023728m.v1.0 annot-version=v1.0	31	8	8	23	300	33.2463	5.93506	0.839641	0.89216	0.896691	0.876164	0.964967	0.892281	0.963662	0.940303	0.931789	0.100886
Ciclev10001384m	pacid=20789188 transcript=Ciclev10001384m locus=Ciclev10001384m.g ID=Ciclev10001384m.v1.0 annot-version=v1.0	54.77	19	20	164	398	44.6144	8.17725	0.951553	1.03734	1.0245	1.00446	1.03495	1.09119	1.1166	1.08091	0.929275	0.100898
Ciclev10009453m	pacid=20795636 transcript=Ciclev10009453m locus=Ciclev10009453m.g ID=Ciclev10009453m.v1.0 annot-version=v1.0	19.07	4	4	21	215	23.6852	9.61279	0.959776	1.0157	1.0748	1.01676	1.09028	1.07337	1.10701	1.09022	0.932616	0.100962
Ciclev10015653m	pacid=20815332 transcript=Ciclev10015653m locus=Ciclev10015653m.g ID=Ciclev10015653m.v1.0 annot-version=v1.0	14.97	4	4	6	374	41.3424	6.20166	0.994989	1.12529	1.10866	1.07631	1.01629	0.976973	0.921391	0.971551	1.10783	0.100963
Ciclev10001709m	pacid=20785686 transcript=Ciclev10001709m locus=Ciclev10001709m.g ID=Ciclev10001709m.v1.0 annot-version=v1.0	3.48	2	2	4	345	37.4425	8.39697	1.04431		1.07675	1.06053	1.1076		1.13291	1.12026	0.946685	0.100965
Ciclev10031325m	pacid=20804251 transcript=Ciclev10031325m locus=Ciclev10031325m.g ID=Ciclev10031325m.v1.0 annot-version=v1.0	7.04	3	3	6	497	55.8392	5.16064		1.05346	1.10999	1.08172		1.16226	1.20249	1.18238	0.91487	0.101098
Ciclev10030286m	pacid=20812970 transcript=Ciclev10030286m locus=Ciclev10030286m.g ID=Ciclev10030286m.v1.0 annot-version=v1.0	6.43	6	6	14	1011	114.179	6.53662	0.990877	0.849806	0.84457	0.895084	1.0067	1.00392	0.982296	0.997639	0.897203	0.102155
Ciclev10026344m	pacid=20799689 transcript=Ciclev10026344m locus=Ciclev10026344m.g ID=Ciclev10026344m.v1.0 annot-version=v1.0	32.13	7	9	104	249	28.1045	5.2876	2.06362	1.60647	2.18903	1.95304	1.57803	1.52564	1.6205	1.57472	1.24024	0.10228
Ciclev10031952m	pacid=20803842 transcript=Ciclev10031952m locus=Ciclev10031952m.g ID=Ciclev10031952m.v1.0 annot-version=v1.0	54.96	2	19	214	353	39.1728	6.32861		1.33336	1.48995	1.41166		1.19201	1.08506	1.13853	1.23989	0.102341
Ciclev10008027m	pacid=20793053 transcript=Ciclev10008027m locus=Ciclev10008027m.g ID=Ciclev10008027m.v1.0 annot-version=v1.0	35.99	13	14	134	514	56.0835	5.35107	1.03517	0.973347	1.10483	1.03778	1.07979	1.17514	1.16617	1.14036	0.910044	0.102635
Ciclev10009649m	pacid=20795991 transcript=Ciclev10009649m locus=Ciclev10009649m.g ID=Ciclev10009649m.v1.0 annot-version=v1.0	29.28	5	5	112	181	19.496	9.23193	1.22916	1.08175	1.15598	1.15563	0.968896	1.10379	1.02925	1.03398	1.11765	0.102817
Ciclev10024858m	pacid=20799963 transcript=Ciclev10024858m locus=Ciclev10024858m.g ID=Ciclev10024858m.v1.0 annot-version=v1.0	7.46	5	5	9	885	101.226	5.32568	1.03791	0.927044	0.869155	0.944704	1.06409	1.02926	1.06096	1.05144	0.898489	0.103265
Ciclev10007809m	pacid=20795398 transcript=Ciclev10007809m locus=Ciclev10007809m.g ID=Ciclev10007809m.v1.0 annot-version=v1.0	14.04	7	7	22	591	64.6235	5.2876	1.24427	1.27031	1.53914	1.35124	1.07494	1.10524	1.21907	1.13308	1.19253	0.103843
Ciclev10010015m	pacid=20792775 transcript=Ciclev10010015m locus=Ciclev10010015m.g ID=Ciclev10010015m.v1.0 annot-version=v1.0	48.48	4	4	21	99	10.7944	6.7417	1.1952	1.14896	1.20336	1.18251	1.21106	1.34152	1.2577	1.27009	0.931041	0.103938
Ciclev10020766m	pacid=20807814 transcript=Ciclev10020766m locus=Ciclev10020753m.g ID=Ciclev10020766m.v1.0 annot-version=v1.0	9.67	5	5	11	362	39.506	4.70361	1.05133	1.01025	0.963264	1.00828	0.992298	0.726637	0.734144	0.817693	1.23308	0.104204
Ciclev10028809m	pacid=20812498 transcript=Ciclev10028809m locus=Ciclev10028809m.g ID=Ciclev10028809m.v1.0 annot-version=v1.0	16.17	5	5	19	334	38.2369	6.43018	0.948251	1.0272	0.904235	0.959896	1.04017	1.07992	1.01451	1.04487	0.918677	0.105063
Ciclev10002863m	pacid=20788801 transcript=Ciclev10002863m locus=Ciclev10002863m.g ID=Ciclev10002863m.v1.0 annot-version=v1.0	42.98	4	4	55	121	12.1258	4.36084	1.00158	1.36253	1.20888	1.191	1.04454	0.934432	0.851032	0.943335	1.26254	0.105145
Ciclev10017754m	pacid=20817521 transcript=Ciclev10017754m locus=Ciclev10017754m.g ID=Ciclev10017754m.v1.0 annot-version=v1.0	20.58	7	8	38	486	52.702	5.13525	1.2144	1.05048	1.13792	1.13427	1.187	1.28982	1.36852	1.28178	0.884918	0.105407
Ciclev10030812m	pacid=20802394 transcript=Ciclev10030812m locus=Ciclev10030803m.g ID=Ciclev10030812m.v1.0 annot-version=v1.0	4.81	3	3	5	728	81.9912	6.63916	1.25637	1.25556		1.25596	1.17141	1.07894		1.12518	1.11624	0.105547
Ciclev10002918m	pacid=20785854 transcript=Ciclev10002918m locus=Ciclev10002917m.g ID=Ciclev10002918m.v1.0 annot-version=v1.0	19.81	2	2	4	106	12.0832	5.45264	1.07799	1.11388	1.19953	1.13047	0.983884	0.822592	1.07361	0.96003	1.17753	0.105627
Ciclev10014774m	pacid=20815357 transcript=Ciclev10014774m locus=Ciclev10014774m.g ID=Ciclev10014774m.v1.0 annot-version=v1.0	16.58	8	9	29	561	61.8253	5.18604	0.96411	0.910237	0.90306	0.925802	0.962368	0.986439	0.959987	0.969598	0.954831	0.105801
Ciclev10015153m	pacid=20818435 transcript=Ciclev10015153m locus=Ciclev10015153m.g ID=Ciclev10015153m.v1.0 annot-version=v1.0	37.07	15	15	58	464	53.329	6.06201	1.03526	0.958266	1.13393	1.04249	0.890398	0.951359	0.945855	0.929204	1.12191	0.105918
Ciclev10026485m	pacid=20801263 transcript=Ciclev10026485m locus=Ciclev10026448m.g ID=Ciclev10026485m.v1.0 annot-version=v1.0	23.33	4	5	20	210	23.7863	4.81787		1.11488	1.06159	1.08824		0.914593	0.993378	0.953986	1.14073	0.105928
Ciclev10007954m	pacid=20794660 transcript=Ciclev10007954m locus=Ciclev10007954m.g ID=Ciclev10007954m.v1.0 annot-version=v1.0	35.94	15	15	119	537	58.3279	7.47412	1.06335	1.1309	1.01235	1.06887	1.01308	0.984704	0.987164	0.994982	1.07426	0.105948
Ciclev10012438m	pacid=20797395 transcript=Ciclev10012438m locus=Ciclev10012261m.g ID=Ciclev10012438m.v1.0 annot-version=v1.0	19.64	4	4	13	275	28.6556	6.93213	0.932874	0.792885	0.84866	0.85814	1.20426	0.882611	1.18792	1.0916	0.786133	0.106013
Ciclev10007953m	pacid=20795224 transcript=Ciclev10007953m locus=Ciclev10007953m.g ID=Ciclev10007953m.v1.0 annot-version=v1.0	15.08	7	7	13	537	61.1661	9.17334	1.09938	1.00687	1.14275	1.083	0.876774	1.05318	0.858736	0.929562	1.16506	0.106287
Ciclev10011791m	pacid=20797719 transcript=Ciclev10011791m locus=Ciclev10011739m.g ID=Ciclev10011791m.v1.0 annot-version=v1.0	14.95	6	6	28	428	47.1827	6.53662	0.934514	0.999416	1.02965	0.987861	1.02507	1.06841	1.06503	1.05284	0.938284	0.10672
Ciclev10015906m	pacid=20816999 transcript=Ciclev10015906m locus=Ciclev10015906m.g ID=Ciclev10015906m.v1.0 annot-version=v1.0	15.85	4	4	7	328	36.1188	8.5874	1.15618	1.01366	1.31195	1.16059	1.06655	0.845322	0.888381	0.933417	1.24338	0.106819
Ciclev10017843m	pacid=20817497 transcript=Ciclev10017843m locus=Ciclev10017843m.g ID=Ciclev10017843m.v1.0 annot-version=v1.0	9.15	4	4	15	634	72.7787	5.79541	1.01625	1.06467	1.01941	1.03344	0.939843	1.02296	0.930059	0.964288	1.07172	0.106908
Ciclev10024839m	pacid=20801414 transcript=Ciclev10024839m locus=Ciclev10024839m.g ID=Ciclev10024839m.v1.0 annot-version=v1.0	32.78	25	26	122	900	102.394	6.82959	1.0027	1.01064	0.94735	0.986897	1.02342	1.02695	1.03618	1.02885	0.959222	0.107211
Ciclev10026576m	pacid=20799987 transcript=Ciclev10026576m locus=Ciclev10026576m.g ID=Ciclev10026576m.v1.0 annot-version=v1.0	4.32	1	1	5	185	20.2667	9.12939	0.75521	0.831992	0.940005	0.842403	0.955763	0.932295	1.08827	0.992111	0.849101	0.107231
Ciclev10017286m	pacid=20814938 transcript=Ciclev10017286m locus=Ciclev10017285m.g ID=Ciclev10017286m.v1.0 annot-version=v1.0	65	7	7	82	100	11.1708	7.40088	0.8564	0.86501	0.871611	0.864341	0.921721	0.89406	1.024	0.946593	0.913107	0.107398
Ciclev10032474m	pacid=20805405 transcript=Ciclev10032474m locus=Ciclev10032474m.g ID=Ciclev10032474m.v1.0 annot-version=v1.0	34.35	8	9	103	262	28.0682	9.02686	1.02801	1.06439	0.989876	1.02742	1.08157	1.14818	1.06193	1.09723	0.936383	0.107993
Ciclev10015108m	pacid=20815053 transcript=Ciclev10015108m locus=Ciclev10015108m.g ID=Ciclev10015108m.v1.0 annot-version=v1.0	12.9	6	6	10	473	53.4913	7.35693	0.814958	0.937187	0.993583	0.915243	1.01081	1.01894	1.05117	1.02697	0.891208	0.108005
Ciclev10032934m	pacid=20804716 transcript=Ciclev10032934m locus=Ciclev10032931m.g ID=Ciclev10032934m.v1.0 annot-version=v1.0	68.48	12	12	162	165	18.3247	8.25049	1.09372	1.00002	1.01132	1.03502	1.22259	1.08832	1.11002	1.14031	0.907667	0.108035
Ciclev10026679m	pacid=20800350 transcript=Ciclev10026679m locus=Ciclev10026679m.g ID=Ciclev10026679m.v1.0 annot-version=v1.0	24.2	3	3	9	157	17.3312	10.1987	1.5612	1.12329	1.0564	1.24696	1.04092	0.786092	0.815663	0.880893	1.41556	0.108277
Ciclev10015576m	pacid=20815035 transcript=Ciclev10015576m locus=Ciclev10015576m.g ID=Ciclev10015576m.v1.0 annot-version=v1.0	33.25	8	9	44	385	42.791	6.45557	0.938986	0.99522	1.00857	0.980925	1.00436	1.04576	1.07097	1.04036	0.942867	0.108301
Ciclev10014035m	pacid=20817344 transcript=Ciclev10014035m locus=Ciclev10014035m.g ID=Ciclev10014035m.v1.0 annot-version=v1.0	13.59	18	18	49	1508	169.494	6.34131	0.964138	0.885733	1.00002	0.949965	1.00873	1.01925	1.03647	1.02148	0.929987	0.108333
Ciclev10007308m	pacid=20793246 transcript=Ciclev10007308m locus=Ciclev10007308m.g ID=Ciclev10007308m.v1.0 annot-version=v1.0	17.11	16	16	61	1064	119.624	5.0083	0.88724	0.934571	0.981959	0.93459	0.958199	1.04542	1.07527	1.0263	0.910644	0.108415
Ciclev10009654m	pacid=20794112 transcript=Ciclev10009654m locus=Ciclev10009655m.g ID=Ciclev10009654m.v1.0 annot-version=v1.0	29.44	4	7	43	180	20.5093	11.2827	1.10914	1.06562	1.06097	1.07858	1.06677	1.00556	1.0066	1.02631	1.05093	0.108631
Ciclev10023146m	pacid=20810117 transcript=Ciclev10023146m locus=Ciclev10022935m.g ID=Ciclev10023146m.v1.0 annot-version=v1.0	13.92	1	1	3	79	8.80741	4.66553	1.00678	1.01305	0.982596	1.00081	0.994708	0.767979	0.748074	0.83692	1.19582	0.108734
Ciclev10021444m	pacid=20807678 transcript=Ciclev10021444m locus=Ciclev10021444m.g ID=Ciclev10021444m.v1.0 annot-version=v1.0	18.37	4	4	5	294	32.979	8.49951		0.958918	1.14872	1.05382		0.80771	0.731801	0.769755	1.36903	0.108747
Ciclev10022662m	pacid=20809252 transcript=Ciclev10022662m locus=Ciclev10022662m.g ID=Ciclev10022662m.v1.0 annot-version=v1.0	68.63	1	7	106	153	17.209	7.34229	1.05598	1.05036		1.05317	1.00285	0.946649		0.974752	1.08045	0.108917
Ciclev10002346m	pacid=20788131 transcript=Ciclev10002346m locus=Ciclev10002346m.g ID=Ciclev10002346m.v1.0 annot-version=v1.0	56.6	12	12	98	235	26.3585	6.22705	0.962307	0.937723	1.05584	0.985289	1.03318	1.07838	1.09151	1.06769	0.92282	0.108968
Ciclev10018763m	pacid=20806150 transcript=Ciclev10018763m locus=Ciclev10018763m.g ID=Ciclev10018763m.v1.0 annot-version=v1.0	11.4	9	9	18	912	100.95	8.19189	1.10129	0.845748	0.952711	0.966582	1.07352	1.15694	1.15674	1.12907	0.856088	0.10926
Ciclev10030612m	pacid=20804061 transcript=Ciclev10030612m locus=Ciclev10030612m.g ID=Ciclev10030612m.v1.0 annot-version=v1.0	3.84	3	3	5	1015	111.481	8.38232	0.948492	0.917473	0.990866	0.952277	0.801819	0.769932	0.939318	0.837023	1.13769	0.109384
Ciclev10015770m	pacid=20819060 transcript=Ciclev10015770m locus=Ciclev10015770m.g ID=Ciclev10015770m.v1.0 annot-version=v1.0	8.5	4	4	13	353	39.0876	7.63525	1.32615	1.34848	1.73449	1.46971	1.19165	1.17974	1.21942	1.19694	1.22789	0.109706
Ciclev10007368m	pacid=20795189 transcript=Ciclev10007368m locus=Ciclev10007368m.g ID=Ciclev10007368m.v1.0 annot-version=v1.0	30.92	9	23	136	954	104.998	6.84424	0.93975	0.967048	0.956727	0.954508	1.01396	4.62228	4.4947	3.37698	0.282652	0.10978
Ciclev10011983m	pacid=20797349 transcript=Ciclev10011983m locus=Ciclev10011983m.g ID=Ciclev10011983m.v1.0 annot-version=v1.0	16	5	5	22	375	40.2431	7.84033	0.99174	0.867292	0.941771	0.933601	0.993776	1.00966	1.10425	1.0359	0.901249	0.110015
Ciclev10016233m	pacid=20816451 transcript=Ciclev10016233m locus=Ciclev10016231m.g ID=Ciclev10016233m.v1.0 annot-version=v1.0	11.68	3	3	5	274	30.9571	8.70459	1.01027	0.938475	0.997297	0.982014	1.05614	1.01418	1.14023	1.07019	0.917611	0.110481
Ciclev10025591m	pacid=20801924 transcript=Ciclev10025591m locus=Ciclev10025591m.g ID=Ciclev10025591m.v1.0 annot-version=v1.0	30.89	10	10	56	450	49.1563	6.37939	1.02937	1.00208	0.923	0.984817	1.05092	1.178	1.05053	1.09315	0.900899	0.110824
Ciclev10007603m	pacid=20795788 transcript=Ciclev10007603m locus=Ciclev10007603m.g ID=Ciclev10007603m.v1.0 annot-version=v1.0	27.27	13	14	53	715	77.3722	8.79248	0.888134	0.901552	0.802364	0.864016	0.827238	0.768448	0.775074	0.790253	1.09334	0.111285
Ciclev10000866m	pacid=20786710 transcript=Ciclev10000866m locus=Ciclev10000866m.g ID=Ciclev10000866m.v1.0 annot-version=v1.0	33.4	18	18	160	521	58.9726	8.71924	1.00682	0.98791	0.917168	0.970634	1.08976	1.07675	0.993669	1.05339	0.921437	0.111297
Ciclev10031610m	pacid=20805523 transcript=Ciclev10031610m locus=Ciclev10031559m.g ID=Ciclev10031610m.v1.0 annot-version=v1.0	22.84	8	9	33	429	46.9321	6.56592	1.08631	1.05677	1.04409	1.06239	1.07166	1.18545	1.1487	1.13527	0.935805	0.111373
Ciclev10014191m	pacid=20816609 transcript=Ciclev10014191m locus=Ciclev10014191m.g ID=Ciclev10014191m.v1.0 annot-version=v1.0	8.98	5	5	11	913	101.308	5.97314	0.925686	0.933903		0.929795	0.900764	0.869008		0.884886	1.05075	0.111509
Ciclev10023282m	pacid=20809191 transcript=Ciclev10023282m locus=Ciclev10023282m.g ID=Ciclev10023282m.v1.0 annot-version=v1.0	3.64	2	2	3	659	74.2567	6.04932	0.870295	0.818379		0.844337	0.757843	0.684228		0.721035	1.17101	0.111546
Ciclev10005613m	pacid=20790205 transcript=Ciclev10005613m locus=Ciclev10005613m.g ID=Ciclev10005613m.v1.0 annot-version=v1.0	63.24	20	20	385	272	30.1123	10.3159	0.934768	0.923627	0.898964	0.91912	0.956346	0.972883	0.929177	0.952802	0.964649	0.111705
Ciclev10004645m	pacid=20790693 transcript=Ciclev10004645m locus=Ciclev10004645m.g ID=Ciclev10004645m.v1.0 annot-version=v1.0	4.23	3	3	4	567	62.2869	8.55811	0.970672	0.814604		0.892638	1.0973	1.11705		1.10717	0.806232	0.112239
Ciclev10002573m	pacid=20787692 transcript=Ciclev10002573m locus=Ciclev10002573m.g ID=Ciclev10002573m.v1.0 annot-version=v1.0	43.23	8	9	46	192	20.8187	4.32275	1.05918	1.11935	1.25177	1.14344	1.04288	1.03883	0.982541	1.02142	1.11946	0.112292
Ciclev10020617m	pacid=20809034 transcript=Ciclev10020617m locus=Ciclev10020471m.g ID=Ciclev10020617m.v1.0 annot-version=v1.0	46.44	16	16	221	379	41.5536	4.99561	0.97249	0.950655	0.934321	0.952489	0.977998	0.981923	1.0441	1.00134	0.951215	0.112544
Ciclev10030701m	pacid=20802440 transcript=Ciclev10030701m locus=Ciclev10030701m.g ID=Ciclev10030701m.v1.0 annot-version=v1.0	6.44	4	4	4	839	94.026	6.43018		0.837371	0.949778	0.893575		1.06632	1.03689	1.05161	0.849723	0.112751
Ciclev10005332m	pacid=20789796 transcript=Ciclev10005332m locus=Ciclev10005332m.g ID=Ciclev10005332m.v1.0 annot-version=v1.0	21.74	7	7	12	345	40.8846	8.66064	1.03036	0.914438	0.874241	0.939681	1.02826	1.18151	1.02939	1.07972	0.870301	0.11281
Ciclev10032556m	pacid=20804067 transcript=Ciclev10032556m locus=Ciclev10032556m.g ID=Ciclev10032556m.v1.0 annot-version=v1.0	29.27	6	6	29	246	27.313	4.98291	1.14724	1.12857	0.961768	1.07919	0.978786	0.966027	0.916701	0.953838	1.13142	0.112938
Ciclev10028238m	pacid=20814182 transcript=Ciclev10028238m locus=Ciclev10028238m.g ID=Ciclev10028238m.v1.0 annot-version=v1.0	3.16	2	2	4	507	58.0626	9.15869	0.960016	0.837348	0.764682	0.854015	1.19926	0.887796	1.28565	1.12423	0.759642	0.113147
Ciclev10004585m	pacid=20790994 transcript=Ciclev10004585m locus=Ciclev10004585m.g ID=Ciclev10004585m.v1.0 annot-version=v1.0	24.67	11	11	15	600	66.7912	9.12939	0.946745	0.849383	1.01704	0.937723	1.09794	1.02785	1.01881	1.0482	0.894603	0.113363
Ciclev10026116m	pacid=20799983 transcript=Ciclev10026116m locus=Ciclev10026113m.g ID=Ciclev10026116m.v1.0 annot-version=v1.0	52.38	15	15	340	315	34.5673	5.8335	0.828763	0.925851	0.908812	0.887809	0.96024	0.994239	0.926006	0.960162	0.924645	0.113581
Ciclev10028558m	pacid=20812887 transcript=Ciclev10028558m locus=Ciclev10028558m.g ID=Ciclev10028558m.v1.0 annot-version=v1.0	36.21	10	10	69	406	43.2253	8.35303	0.96335	0.877845	0.928141	0.923112	0.944378	1.11151	1.04336	1.03308	0.893551	0.113762
Ciclev10016540m	pacid=20819283 transcript=Ciclev10016540m locus=Ciclev10016540m.g ID=Ciclev10016540m.v1.0 annot-version=v1.0	20.43	5	5	29	230	24.9393	9.64209	1.07867	1.13516	1.33046	1.18143	1.04051	0.798782	1.03645	0.958581	1.23248	0.113848
Ciclev10011305m	pacid=20797002 transcript=Ciclev10011305m locus=Ciclev10011305m.g ID=Ciclev10011305m.v1.0 annot-version=v1.0	20	10	10	28	620	69.515	5.57959	1.22674	1.34517	0.975345	1.18242	0.986442	0.800456	0.996212	0.927703	1.27457	0.11386
Ciclev10002590m	pacid=20786087 transcript=Ciclev10002590m locus=Ciclev10002572m.g ID=Ciclev10002590m.v1.0 annot-version=v1.0	16.4	3	3	10	189	21.1858	6.55127	1.24658	1.00613	1.08346	1.11206	0.986486	0.910501	0.984842	0.960609	1.15766	0.114175
Ciclev10028834m	pacid=20813674 transcript=Ciclev10028834m locus=Ciclev10028834m.g ID=Ciclev10028834m.v1.0 annot-version=v1.0	7.69	3	3	13	325	36.3994	6.12549	0.602045	0.678336	0.735447	0.671943	0.588889	0.600595	0.592068	0.593851	1.1315	0.114448
Ciclev10012611m	pacid=20797823 transcript=Ciclev10012611m locus=Ciclev10012611m.g ID=Ciclev10012611m.v1.0 annot-version=v1.0	3.75	1	1	6	240	26.0726	8.99756	1.23844	1.44527	1.17172	1.28514	1.07547	1.12461	1.1436	1.11456	1.15305	0.114623
Ciclev10011613m	pacid=20797048 transcript=Ciclev10011613m locus=Ciclev10011613m.g ID=Ciclev10011613m.v1.0 annot-version=v1.0	18.01	6	7	23	483	51.8023	8.83643	1.13868	1.25549	1.09347	1.16255	1.10035	0.972041	1.04745	1.03995	1.11789	0.114633
Ciclev10020804m	pacid=20809071 transcript=Ciclev10020804m locus=Ciclev10020804m.g ID=Ciclev10020804m.v1.0 annot-version=v1.0	3.91	1	1	3	358	39.2478	9.11475	0.92956	0.808882		0.869221	1.02349	1.10187		1.06268	0.817954	0.114951
Ciclev10026268m	pacid=20800969 transcript=Ciclev10026268m locus=Ciclev10026221m.g ID=Ciclev10026268m.v1.0 annot-version=v1.0	22.51	5	5	12	271	30.7887	9.02686	0.965016	1.18177	1.10297	1.08325	1.01049	0.874238	0.912235	0.932322	1.16189	0.115309
Ciclev10009414m	pacid=20795441 transcript=Ciclev10009414m locus=Ciclev10009412m.g ID=Ciclev10009414m.v1.0 annot-version=v1.0	28.7	6	7	25	223	25.652	4.93213	1.01844	1.04569	0.972187	1.0121	1.02843	1.13563	1.10232	1.08879	0.929566	0.115524
Ciclev10014084m	pacid=20817457 transcript=Ciclev10014084m locus=Ciclev10014084m.g ID=Ciclev10014084m.v1.0 annot-version=v1.0	17.15	15	15	29	1166	128.898	5.26221	1.19982	1.26541	1.16263	1.20929	1.07637	0.926807	1.16695	1.05671	1.14439	0.115785
Ciclev10026154m	pacid=20800710 transcript=Ciclev10026154m locus=Ciclev10026154m.g ID=Ciclev10026154m.v1.0 annot-version=v1.0	30.59	9	9	33	304	35.4363	4.97021	1.15381	1.18762	1.28936	1.21026	1.99094	1.59601	1.28861	1.62518	0.744694	0.115927
Ciclev10004616m	pacid=20791439 transcript=Ciclev10004616m locus=Ciclev10004616m.g ID=Ciclev10004616m.v1.0 annot-version=v1.0	30.93	14	15	79	582	64.3077	6.04932	0.984361	1.02197	0.981796	0.996043	1.00244	1.08478	1.07499	1.05407	0.944949	0.116308
Ciclev10019260m	pacid=20809746 transcript=Ciclev10019260m locus=Ciclev10019260m.g ID=Ciclev10019260m.v1.0 annot-version=v1.0	12.5	4	4	7	640	72.9019	5.84619	1.08085	0.967095	0.968161	1.00537	0.940009	0.813076	0.930113	0.894399	1.12407	0.116437
Ciclev10017280m	pacid=20815471 transcript=Ciclev10017280m locus=Ciclev10017277m.g ID=Ciclev10017280m.v1.0 annot-version=v1.0	29.13	3	3	33	103	12.0711	7.78174	1.00683	1.14528	1.10456	1.08556	0.89501	1.01729	1.00534	0.972549	1.1162	0.116539
Ciclev10032741m	pacid=20803296 transcript=Ciclev10032741m locus=Ciclev10032741m.g ID=Ciclev10032741m.v1.0 annot-version=v1.0	11.85	3	3	7	211	24.018	6.87354	0.922904	0.990203	1.00157	0.971561	1.00058	1.03571	1.08079	1.03903	0.935069	0.116553
Ciclev10033038m	pacid=20803056 transcript=Ciclev10033038m locus=Ciclev10033038m.g ID=Ciclev10033038m.v1.0 annot-version=v1.0	45.26	5	5	35	137	15.2469	8.11865	0.956984	0.933674	0.941424	0.944027	1.00933	0.949043	1.04245	1.00027	0.943769	0.116717
Ciclev10004761m	pacid=20791083 transcript=Ciclev10004761m locus=Ciclev10004761m.g ID=Ciclev10004761m.v1.0 annot-version=v1.0	20.08	6	6	10	513	55.8708	6.72705	0.86365	1.37004	1.1522	1.12863	0.853712	0.867553	0.767646	0.829637	1.36039	0.11692
Ciclev10004546m	pacid=20790598 transcript=Ciclev10004546m locus=Ciclev10004546m.g ID=Ciclev10004546m.v1.0 annot-version=v1.0	10.65	4	4	9	629	71.3663	6.3667	0.947008	0.879146	1.00896	0.945039	1.07702	1.14352	0.978062	1.0662	0.886362	0.117773
Ciclev10006127m	pacid=20792186 transcript=Ciclev10006127m locus=Ciclev10006127m.g ID=Ciclev10006127m.v1.0 annot-version=v1.0	72.9	2	8	133	155	17.3415	10.4331	1.16526	0.936605	1.03332	1.04506	0.899606	0.938088	0.894427	0.910707	1.14753	0.118116
Ciclev10033072m	pacid=20805059 transcript=Ciclev10033072m locus=Ciclev10033072m.g ID=Ciclev10033072m.v1.0 annot-version=v1.0	12.5	1	2	26	128	14.7877	10.77	1.05038	1.02239	0.993274	1.02201	1.01713	0.857278	0.874719	0.916375	1.11528	0.118254
Ciclev10007864m	pacid=20795596 transcript=Ciclev10007864m locus=Ciclev10007864m.g ID=Ciclev10007864m.v1.0 annot-version=v1.0	7.91	3	3	6	569	62.3211	6.22705		1.35775	1.26286	1.3103		1.47222	1.62659	1.5494	0.845683	0.118583
Ciclev10001731m	pacid=20789057 transcript=Ciclev10001731m locus=Ciclev10001729m.g ID=Ciclev10001731m.v1.0 annot-version=v1.0	8.19	2	2	11	342	34.1592	9.99365	1.10346	1.04516	1.06509	1.07124	1.06955	0.812919	0.821917	0.901463	1.18833	0.118999
Ciclev10021466m	pacid=20805912 transcript=Ciclev10021466m locus=Ciclev10021032m.g ID=Ciclev10021466m.v1.0 annot-version=v1.0	27.59	3	6	16	290	32.6008	9.01221	1.12732		1.01694	1.07213	0.916403		0.793792	0.855098	1.25381	0.119183
Ciclev10016214m	pacid=20818018 transcript=Ciclev10016214m locus=Ciclev10016214m.g ID=Ciclev10016214m.v1.0 annot-version=v1.0	9.06	2	2	2	276	31.0597	6.22705	1.03027	1.05057		1.04042	1.00738	0.976645		0.992011	1.0488	0.119328
Ciclev10032081m	pacid=20803049 transcript=Ciclev10032081m locus=Ciclev10032081m.g ID=Ciclev10032081m.v1.0 annot-version=v1.0	13.94	4	4	10	330	36.4279	9.18799	0.897728	0.912234	0.793353	0.867771	0.803732	0.769498	0.605676	0.726302	1.19478	0.119655
Ciclev10032524m	pacid=20804072 transcript=Ciclev10032524m locus=Ciclev10032524m.g ID=Ciclev10032524m.v1.0 annot-version=v1.0	3.54	1	1	2	254	26.9878	7.85498		1.64976	1.29927	1.47451		1.04323	0.963849	1.00354	1.46931	0.11993
Ciclev10029485m	pacid=20814477 transcript=Ciclev10029485m locus=Ciclev10029485m.g ID=Ciclev10029485m.v1.0 annot-version=v1.0	34.42	4	4	28	154	17.2254	7.50342	0.92891	0.947572	0.890251	0.922244	0.994778	0.964277	0.942141	0.967066	0.953652	0.120196
Ciclev10004793m	pacid=20792418 transcript=Ciclev10004793m locus=Ciclev10004793m.g ID=Ciclev10004793m.v1.0 annot-version=v1.0	49.9	21	21	239	507	53.807	7.06396	0.95872	1.00941	0.971326	0.979818	0.990784	1.04593	1.07797	1.03823	0.94374	0.120368
Ciclev10008482m	pacid=20795895 transcript=Ciclev10008482m locus=Ciclev10008482m.g ID=Ciclev10008482m.v1.0 annot-version=v1.0	22.55	1	10	44	408	45.3611	8.33838		1.01027	0.915343	0.962808		1.09057	1.18494	1.13776	0.846234	0.120469
Ciclev10020303m	pacid=20806353 transcript=Ciclev10020303m locus=Ciclev10020303m.g ID=Ciclev10020303m.v1.0 annot-version=v1.0	43.13	14	18	152	422	47.9846	6.17627	0.870766	0.920185	1.04768	0.946211	1.03	1.11712	1.04179	1.06297	0.890159	0.12054
Ciclev10028768m	pacid=20814625 transcript=Ciclev10028768m locus=Ciclev10028768m.g ID=Ciclev10028768m.v1.0 annot-version=v1.0	33.82	4	11	73	343	38.678	7.89893	1.1128	1.27377	1.51276	1.29978	0.909188	0.987998	1.17452	1.0239	1.26944	0.120708
Ciclev10010963m	pacid=20798291 transcript=Ciclev10010963m locus=Ciclev10010963m.g ID=Ciclev10010963m.v1.0 annot-version=v1.0	12	8	8	21	1042	118.575	6.72705	1.06625	1.05412		1.06019	1.23819	1.14013		1.18916	0.891545	0.120726
Ciclev10000804m	pacid=20787278 transcript=Ciclev10000804m locus=Ciclev10000804m.g ID=Ciclev10000804m.v1.0 annot-version=v1.0	37.36	14	18	55	538	61.1094	5.36377	1.13977	1.18401	1.17633	1.1667	1.11466	1.10458	0.942858	1.05403	1.10689	0.120739
Ciclev10018438m	pacid=20807239 transcript=Ciclev10018438m locus=Ciclev10018438m.g ID=Ciclev10018438m.v1.0 annot-version=v1.0	4.87	9	9	13	2240	250.718	8.82178	0.920374	0.9426	1.03069	0.964556	0.873232	0.706193	0.902888	0.827437	1.16571	0.121245
Ciclev10002819m	pacid=20786600 transcript=Ciclev10002819m locus=Ciclev10002819m.g ID=Ciclev10002819m.v1.0 annot-version=v1.0	40.3	3	7	182	134	15.4416	10.6968	0.939254	0.885803	0.997141	0.940733	1.02391	0.978575	1.03351	1.012	0.929579	0.121397
Ciclev10016821m	pacid=20815954 transcript=Ciclev10016821m locus=Ciclev10016821m.g ID=Ciclev10016821m.v1.0 annot-version=v1.0	23.71	3	4	61	194	21.0213	9.5542	0.88575	0.927379	0.876464	0.896531	0.945597	1.01226	0.918972	0.958943	0.934915	0.121669
Ciclev10002797m	pacid=20786027 transcript=Ciclev10002797m locus=Ciclev10002797m.g ID=Ciclev10002797m.v1.0 annot-version=v1.0	12.68	2	2	4	142	17.0689	6.27783	1.08761	1.22307	1.0422	1.11763	1.04728	0.987931	0.970399	1.00187	1.11554	0.121725
Ciclev10015941m	pacid=20816370 transcript=Ciclev10015941m locus=Ciclev10015210m.g ID=Ciclev10015941m.v1.0 annot-version=v1.0	13.98	2	4	10	322	35.7956	9.46631	0.875876	0.904354		0.890115	0.983001	1.0938		1.0384	0.857197	0.122131
Ciclev10007310m	pacid=20794460 transcript=Ciclev10007310m locus=Ciclev10007310m.g ID=Ciclev10007310m.v1.0 annot-version=v1.0	34.03	28	28	128	1058	114.886	7.06396	0.977568	1.04365	0.921669	0.980964	1.04264	1.10149	1.03782	1.06065	0.924871	0.122296
Ciclev10009291m	pacid=20795693 transcript=Ciclev10009291m locus=Ciclev10009291m.g ID=Ciclev10009291m.v1.0 annot-version=v1.0	9.68	3	3	6	248	26.7323	9.11475	1.28143	1.3323	1.31652	1.31008	1.30941	1.54467	1.53335	1.46248	0.895796	0.122653
Ciclev10000541m	pacid=20788888 transcript=Ciclev10000541m locus=Ciclev10000541m.g ID=Ciclev10000541m.v1.0 annot-version=v1.0	35.59	20	20	85	649	71.9481	5.40186	0.957637	0.952611	0.918074	0.942774	1.03424	1.04095	0.946182	1.00712	0.936105	0.122684
Ciclev10025609m	pacid=20801809 transcript=Ciclev10025609m locus=Ciclev10025609m.g ID=Ciclev10025609m.v1.0 annot-version=v1.0	34.09	17	17	82	443	47.7961	9.30518	1.11798	1.05488	1.10235	1.09174	1.18566	1.11643	1.13681	1.1463	0.952402	0.12278
Ciclev10022742m	pacid=20808346 transcript=Ciclev10022742m locus=Ciclev10022742m.g ID=Ciclev10022742m.v1.0 annot-version=v1.0	30.07	4	4	13	143	16.5586	9.93506	1.03478	1.23519	1.16198	1.14398	0.961996	1.08887	0.9535	1.00145	1.14232	0.123
Ciclev10018629m	pacid=20808949 transcript=Ciclev10018629m locus=Ciclev10018590m.g ID=Ciclev10018629m.v1.0 annot-version=v1.0	18.46	14	19	73	1067	118.218	7.86963	0.929796	1.02715	0.964893	0.973945	1.02261	1.02404	1.04905	1.0319	0.943839	0.123069
Ciclev10015385m	pacid=20817452 transcript=Ciclev10015385m locus=Ciclev10015385m.g ID=Ciclev10015385m.v1.0 annot-version=v1.0	47.6	9	20	214	416	46.4319	6.41748	0.994749	0.970402	1.0195	0.994885	1.02668	1.06591	1.01467	1.03575	0.960544	0.123308
Ciclev10020366m	pacid=20806736 transcript=Ciclev10020366m locus=Ciclev10020366m.g ID=Ciclev10020366m.v1.0 annot-version=v1.0	60.39	19	19	130	414	45.0416	8.26514	0.937288	0.965442	0.923933	0.942221	0.989876	1.00118	0.950417	0.980492	0.960968	0.123412
Ciclev10005706m	pacid=20790358 transcript=Ciclev10005706m locus=Ciclev10005686m.g ID=Ciclev10005706m.v1.0 annot-version=v1.0	5.56	2	2	6	252	27.5593	8.39697	1.08098	1.18119	1.18462	1.14893	1.0707	1.07448	1.09739	1.08086	1.06298	0.123673
Ciclev10027860m	pacid=20813448 transcript=Ciclev10027860m locus=Ciclev10027858m.g ID=Ciclev10027860m.v1.0 annot-version=v1.0	40.18	25	25	176	779	84.0281	7.53271	0.98761	1.07162	1.04956	1.03626	1.1015	1.09283	1.07063	1.08832	0.952168	0.123768
Ciclev10001743m	pacid=20787694 transcript=Ciclev10001743m locus=Ciclev10001743m.g ID=Ciclev10001743m.v1.0 annot-version=v1.0	13.57	5	5	11	339	37.436	8.83643	0.941465	1.03774	0.973008	0.984071	1.11036	1.09297	1.00332	1.06888	0.920652	0.123773
Ciclev10004217m	pacid=20789654 transcript=Ciclev10004217m locus=Ciclev10004217m.g ID=Ciclev10004217m.v1.0 annot-version=v1.0	1.83	2	2	3	1090	121.555	4.86865		0.839333	0.797238	0.818285		0.880786	0.868413	0.8746	0.935611	0.124125
Ciclev10019671m	pacid=20807305 transcript=Ciclev10019671m locus=Ciclev10019671m.g ID=Ciclev10019671m.v1.0 annot-version=v1.0	18.42	8	8	23	532	59.3479	9.5249	0.961002	0.842513	0.943703	0.915739	1.10226	1.05225	0.941812	1.0321	0.887254	0.124924
Ciclev10006115m	pacid=20791005 transcript=Ciclev10006115m locus=Ciclev10006115m.g ID=Ciclev10006115m.v1.0 annot-version=v1.0	5.1	1	1	5	157	17.3994	9.70068	1.04452	0.752462	0.897939	0.898308	1.06283	1.2605	1.0216	1.11498	0.805674	0.125161
Ciclev10008024m	pacid=20794343 transcript=Ciclev10008024m locus=Ciclev10008024m.g ID=Ciclev10008024m.v1.0 annot-version=v1.0	5.43	2	2	4	516	57.3193	8.20654	0.932693	0.897867		0.91528	1.18357	1.03521		1.10939	0.825031	0.125687
Ciclev10006440m	pacid=20791232 transcript=Ciclev10006440m locus=Ciclev10006440m.g ID=Ciclev10006440m.v1.0 annot-version=v1.0	4.35	2	2	4	529	59.9541	7.23975	1.09996	1.29583		1.1979	0.915833	0.966387		0.94111	1.27286	0.126399
Ciclev10028610m	pacid=20813862 transcript=Ciclev10028610m locus=Ciclev10028610m.g ID=Ciclev10028610m.v1.0 annot-version=v1.0	22.59	7	7	17	394	43.0526	9.33447	1.20232	1.27005	1.29785	1.25674	1.19918	0.809932	1.07746	1.02886	1.22149	0.126616
Ciclev10031951m	pacid=20805029 transcript=Ciclev10031951m locus=Ciclev10031951m.g ID=Ciclev10031951m.v1.0 annot-version=v1.0	52.97	3	18	229	353	39.5138	6.32861	1.87231	1.51819	1.67507	1.68852	1.52421	1.51178	1.26804	1.43468	1.17694	0.127028
Ciclev10001661m	pacid=20786144 transcript=Ciclev10001661m locus=Ciclev10001661m.g ID=Ciclev10001661m.v1.0 annot-version=v1.0	66.57	16	18	334	353	39.2858	6.88818	1.10572	1.02102	1.04235	1.05636	1.08888	1.18674	1.11632	1.13064	0.934302	0.127219
Ciclev10007590m	pacid=20792752 transcript=Ciclev10007590m locus=Ciclev10007590m.g ID=Ciclev10007590m.v1.0 annot-version=v1.0	41.3	27	27	245	724	78.132	9.12939	1.07358	0.980961	0.947585	1.00071	1.03624	1.12035	1.11146	1.08935	0.91863	0.127319
Ciclev10007417m	pacid=20792904 transcript=Ciclev10007417m locus=Ciclev10007414m.g ID=Ciclev10007417m.v1.0 annot-version=v1.0	39.86	31	31	212	873	98.3689	5.51611	0.932653	1.00627	0.922465	0.953795	0.982506	1.02203	1.03209	1.01221	0.942291	0.127333
Ciclev10026297m	pacid=20801056 transcript=Ciclev10026297m locus=Ciclev10026175m.g ID=Ciclev10026297m.v1.0 annot-version=v1.0	21.97	5	5	16	264	28.8759	8.74854	0.980995	1.0544	0.876813	0.970736	0.897769	0.869678	0.751376	0.839608	1.15618	0.127333
Ciclev10023000m	pacid=20807995 transcript=Ciclev10023000m locus=Ciclev10022815m.g ID=Ciclev10023000m.v1.0 annot-version=v1.0	7.69	1	1	4	104	10.3991	8.49951	0.852254	0.874205	0.964831	0.897096	0.754014	0.828793	0.849416	0.810741	1.10651	0.12756
Ciclev10013510m	pacid=20798610 transcript=Ciclev10013510m locus=Ciclev10013510m.g ID=Ciclev10013510m.v1.0 annot-version=v1.0	34.14	19	20	103	618	66.9336	9.1001	0.802556	0.893054	0.830431	0.842014	0.870712	0.98555	0.915843	0.924035	0.911236	0.127799
Ciclev10014823m	pacid=20816674 transcript=Ciclev10014823m locus=Ciclev10014823m.g ID=Ciclev10014823m.v1.0 annot-version=v1.0	20.4	7	9	24	544	61.1957	6.60986	0.935033		0.816544	0.875789	1.01319		1.05483	1.03401	0.846985	0.127975
Ciclev10028621m	pacid=20814396 transcript=Ciclev10028621m locus=Ciclev10028621m.g ID=Ciclev10028621m.v1.0 annot-version=v1.0	45.9	18	18	130	390	43.5913	6.15088	0.974457	1.02061	0.989557	0.994874	1.0104	1.05399	1.12146	1.06195	0.936838	0.128157
Ciclev10007551m	pacid=20794795 transcript=Ciclev10007551m locus=Ciclev10007551m.g ID=Ciclev10007551m.v1.0 annot-version=v1.0	10.74	8	8	14	754	81.9381	5.80811	0.981405	1.22268	1.15839	1.12083	0.920775	1.03706	0.942805	0.966881	1.15922	0.128299
Ciclev10033093m	pacid=20804391 transcript=Ciclev10033093m locus=Ciclev10033093m.g ID=Ciclev10033093m.v1.0 annot-version=v1.0	33.33	1	4	88	120	13.7088	11.605	0.93634	1.09135	1.10972	1.0458	0.929879	0.943224	0.948168	0.940424	1.11205	0.129187
Ciclev10008663m	pacid=20793174 transcript=Ciclev10008663m locus=Ciclev10008663m.g ID=Ciclev10008663m.v1.0 annot-version=v1.0	2.13	1	1	4	376	40.5562	4.84326	0.988895	1.0013	0.853884	0.948027	1.05252	1.10453	1.00378	1.05361	0.899791	0.129633
Ciclev10009366m	pacid=20793634 transcript=Ciclev10009366m locus=Ciclev10009334m.g ID=Ciclev10009366m.v1.0 annot-version=v1.0	46.98	9	10	70	232	25.6499	5.99854	0.968832	1.06151	1.17574	1.0687	0.945528	0.934436	0.976849	0.952271	1.12226	0.129745
Ciclev10026610m	pacid=20801880 transcript=Ciclev10026610m locus=Ciclev10026606m.g ID=Ciclev10026610m.v1.0 annot-version=v1.0	6.29	1	1	3	175	19.9058	4.88135		1.25222	1.29931	1.27577		1.14487	1.20867	1.17677	1.08412	0.129891
Ciclev10007234m	pacid=20793083 transcript=Ciclev10007234m locus=Ciclev10007234m.g ID=Ciclev10007234m.v1.0 annot-version=v1.0	17.46	31	31	87	1821	204.122	6.80029	1.01709	0.89063	0.975389	0.961036	1.08602	1.07573	0.992572	1.05144	0.91402	0.129948
Ciclev10016110m	pacid=20817178 transcript=Ciclev10016110m locus=Ciclev10016110m.g ID=Ciclev10016110m.v1.0 annot-version=v1.0	12.84	4	4	9	296	33.0454	5.2876	0.958639	1.06004	0.992524	1.00374	1.01841	1.13702	1.14114	1.09885	0.913439	0.130326
Ciclev10000425m	pacid=20787673 transcript=Ciclev10000425m locus=Ciclev10000425m.g ID=Ciclev10000425m.v1.0 annot-version=v1.0	11.65	6	6	15	721	80.2258	5.97314	1.07842		1.09063	1.08453	0.978445		1.03836	1.0084	1.07549	0.130475
Ciclev10003179m	pacid=20786949 transcript=Ciclev10003179m locus=Ciclev10003179m.g ID=Ciclev10003179m.v1.0 annot-version=v1.0	0.75	1	1	2	663	74.623	6.29053	0.961216	0.634527		0.797871	1.23756	1.18285		1.2102	0.659286	0.13049
Ciclev10024320m	pacid=20810302 transcript=Ciclev10024320m locus=Ciclev10024320m.g ID=Ciclev10024320m.v1.0 annot-version=v1.0	26.73	8	8	18	419	44.9786	7.15186	1.09433	1.20175	0.91419	1.07009	0.944665	0.69996	0.916205	0.85361	1.2536	0.130522
Ciclev10032084m	pacid=20805692 transcript=Ciclev10032084m locus=Ciclev10032084m.g ID=Ciclev10032084m.v1.0 annot-version=v1.0	52.73	15	15	137	330	36.9911	6.62451	1.20486	1.11691	1.14627	1.15601	1.19335	1.25813	1.40903	1.28684	0.898336	0.130527
Ciclev10031415m	pacid=20803817 transcript=Ciclev10031415m locus=Ciclev10031415m.g ID=Ciclev10031415m.v1.0 annot-version=v1.0	15.61	6	6	17	474	53.0327	8.30908	0.884214	0.83925	0.88821	0.870558	0.708107	0.784896	0.857467	0.78349	1.11113	0.130644
Ciclev10019358m	pacid=20807301 transcript=Ciclev10019358m locus=Ciclev10019359m.g ID=Ciclev10019358m.v1.0 annot-version=v1.0	2.79	2	2	2	609	66.4724	6.88818	1.03593		1.2268	1.13136	0.913978		0.822001	0.867989	1.30343	0.130791
Ciclev10017877m	pacid=20817209 transcript=Ciclev10017877m locus=Ciclev10017877m.g ID=Ciclev10017877m.v1.0 annot-version=v1.0	45.32	14	16	133	395	42.9911	8.60205	1.1245	1.09103	1.0652	1.09358	1.0976	1.21888	1.19906	1.17185	0.933209	0.130966
Ciclev10027871m	pacid=20814758 transcript=Ciclev10027871m locus=Ciclev10027871m.g ID=Ciclev10027871m.v1.0 annot-version=v1.0	16.71	10	10	28	754	84.0894	6.93213	1.01568	0.920321	0.937111	0.957705	0.962713	0.609942	0.625479	0.732711	1.30707	0.131118
Ciclev10006199m	pacid=20789630 transcript=Ciclev10006199m locus=Ciclev10006199m.g ID=Ciclev10006199m.v1.0 annot-version=v1.0	43.94	4	5	110	132	14.1884	9.49561	1.02462	0.958551	1.00419	0.995787	0.922906	0.854252	0.978228	0.918462	1.08419	0.131179
Ciclev10007625m	pacid=20796160 transcript=Ciclev10007625m locus=Ciclev10007625m.g ID=Ciclev10007625m.v1.0 annot-version=v1.0	7.4	5	5	11	703	78.0075	6.93213	0.896789	1.04988	0.962725	0.969798	0.779428	0.930386	0.846199	0.852004	1.13825	0.131331
Ciclev10023032m	pacid=20809166 transcript=Ciclev10023032m locus=Ciclev10023032m.g ID=Ciclev10023032m.v1.0 annot-version=v1.0	57.14	4	4	27	98	10.6946	4.83057	0.902882	0.913888	0.972701	0.929824	0.951024	1.00876	0.985007	0.981596	0.947257	0.131754
Ciclev10020519m	pacid=20808852 transcript=Ciclev10020519m locus=Ciclev10020519m.g ID=Ciclev10020519m.v1.0 annot-version=v1.0	57.29	12	14	125	391	41.3407	8.04541	1.04193	1.12585	1.131	1.09959	1.01068	1.00854	1.07475	1.03132	1.06619	0.131808
Ciclev10014769m	pacid=20816672 transcript=Ciclev10014769m locus=Ciclev10014769m.g ID=Ciclev10014769m.v1.0 annot-version=v1.0	4.63	3	3	11	562	59.8719	9.59814	1.07773	1.07384	0.965946	1.03917	1.06527	1.21673	1.16096	1.14765	0.905477	0.131892
Ciclev10025217m	pacid=20799600 transcript=Ciclev10025217m locus=Ciclev10025217m.g ID=Ciclev10025217m.v1.0 annot-version=v1.0	38.09	15	19	67	596	66.6679	4.94482	1.1559	1.13028	1.39446	1.22688	1.08629	1.09235	0.989216	1.05595	1.16187	0.131985
Ciclev10018440m	pacid=20807653 transcript=Ciclev10018440m locus=Ciclev10018441m.g ID=Ciclev10018440m.v1.0 annot-version=v1.0	1.16	2	2	4	2239	248.319	8.47021	1.16962		0.991012	1.08032	0.816003		0.877978	0.846991	1.27548	0.132325
Ciclev10014850m	pacid=20814934 transcript=Ciclev10014850m locus=Ciclev10014850m.g ID=Ciclev10014850m.v1.0 annot-version=v1.0	10.65	5	5	10	535	59.3776	5.68115	1.17639	1.07791	1.07891	1.11107	1.06358	0.827064	1.0015	0.964049	1.1525	0.132413
Ciclev10008825m	pacid=20793014 transcript=Ciclev10008825m locus=Ciclev10008825m.g ID=Ciclev10008825m.v1.0 annot-version=v1.0	9.33	3	3	11	343	36.5861	5.31299	0.935488	1.03174	0.846418	0.937881	1.03344	1.05584	1.03014	1.0398	0.901978	0.132751
Ciclev10024325m	pacid=20808301 transcript=Ciclev10024325m locus=Ciclev10024325m.g ID=Ciclev10024325m.v1.0 annot-version=v1.0	9.77	1	2	9	215	24.164	6.78564	0.642759		0.621776	0.632267	0.599429		0.564149	0.581789	1.08676	0.1331
Ciclev10010948m	pacid=20796501 transcript=Ciclev10010948m locus=Ciclev10010948m.g ID=Ciclev10010948m.v1.0 annot-version=v1.0	4.07	4	4	11	1107	120.737	5.64307	1.01585	1.09429	1.00769	1.03927	1.06814	1.26908	1.14514	1.16079	0.895317	0.133639
Ciclev10021638m	pacid=20807210 transcript=Ciclev10021638m locus=Ciclev10021639m.g ID=Ciclev10021638m.v1.0 annot-version=v1.0	8.86	2	2	5	271	30.6177	9.18799	0.877825	0.809665		0.843745	0.93866	0.921013		0.929836	0.907412	0.134327
Ciclev10024178m	pacid=20811587 transcript=Ciclev10024178m locus=Ciclev10024178m.g ID=Ciclev10024178m.v1.0 annot-version=v1.0	44.93	3	3	8	69	7.76888	5.94775	0.991072	1.17962	1.04088	1.07052	0.807202	0.84932	1.04122	0.899246	1.19047	0.134479
Ciclev10029386m	pacid=20812277 transcript=Ciclev10029386m locus=Ciclev10029386m.g ID=Ciclev10029386m.v1.0 annot-version=v1.0	57.56	8	11	533	172	18.0819	8.45557	0.88063	0.794726	0.849631	0.841663	0.989726	0.851694	0.956434	0.932618	0.902473	0.134497
Ciclev10028981m	pacid=20812173 transcript=Ciclev10028981m locus=Ciclev10028981m.g ID=Ciclev10028981m.v1.0 annot-version=v1.0	20.49	5	5	12	288	31.4515	9.27588		1.01794	1.10181	1.05988		0.9467	0.96402	0.95536	1.1094	0.134737
Ciclev10027828m	pacid=20813798 transcript=Ciclev10027828m locus=Ciclev10027828m.g ID=Ciclev10027828m.v1.0 annot-version=v1.0	28.55	19	20	97	823	92.7886	5.75732	1.04917	1.01179	0.98269	1.01455	1.02491	1.12297	1.09023	1.07937	0.939946	0.134757
Ciclev10006260m	pacid=20790165 transcript=Ciclev10006260m locus=Ciclev10006260m.g ID=Ciclev10006260m.v1.0 annot-version=v1.0	31.25	3	3	5	112	12.1788	4.77979	0.988217	1.24678	1.14446	1.12648	1.04004	0.91385	0.955253	0.969715	1.16167	0.134893
Ciclev10004893m	pacid=20791483 transcript=Ciclev10004893m locus=Ciclev10004887m.g ID=Ciclev10004893m.v1.0 annot-version=v1.0	5.49	1	3	17	474	52.711	5.52881	0.937529	1.1537	1.04125	1.04416	0.913064	0.970242	0.84276	0.908688	1.14908	0.13503
Ciclev10020553m	pacid=20805897 transcript=Ciclev10020553m locus=Ciclev10020553m.g ID=Ciclev10020553m.v1.0 annot-version=v1.0	20.21	5	5	11	386	42.7494	7.81104	1.26135		1.41534	1.33835	1.0063		1.15265	1.07947	1.23982	0.135071
Ciclev10003914m	pacid=20786891 transcript=Ciclev10003914m locus=Ciclev10003914m.g ID=Ciclev10003914m.v1.0 annot-version=v1.0	7.27	6	6	7	977	109.818	9.02686	1.01181		1.12115	1.06648	0.935115		0.832068	0.883592	1.20698	0.135308
Ciclev10015774m	pacid=20815197 transcript=Ciclev10015774m locus=Ciclev10015774m.g ID=Ciclev10015774m.v1.0 annot-version=v1.0	21.31	6	7	11	352	40.5182	6.72705	1.08938	1.38691	1.16633	1.21421	0.986572	1.1315	0.886259	1.00144	1.21246	0.135638
Ciclev10004891m	pacid=20791114 transcript=Ciclev10004891m locus=Ciclev10004891m.g ID=Ciclev10004891m.v1.0 annot-version=v1.0	59.49	19	23	237	474	49.4154	8.14795	1.07102	1.08927	1.03207	1.06412	1.0868	1.102	1.15998	1.11626	0.95329	0.135643
Ciclev10031755m	pacid=20803828 transcript=Ciclev10031755m locus=Ciclev10031585m.g ID=Ciclev10031755m.v1.0 annot-version=v1.0	23.86	8	9	35	394	44.1066	8.20654	1.05657	1.16011	1.08203	1.09957	0.907732	1.07841	0.986303	0.990815	1.10976	0.135726
Ciclev10019205m	pacid=20807931 transcript=Ciclev10019205m locus=Ciclev10019205m.g ID=Ciclev10019205m.v1.0 annot-version=v1.0	13.18	8	8	28	660	74.289	5.78271	0.900366	0.756148	0.905553	0.854022	0.991567	0.966301	0.909572	0.955813	0.893503	0.135902
Ciclev10011098m	pacid=20796949 transcript=Ciclev10011098m locus=Ciclev10011098m.g ID=Ciclev10011098m.v1.0 annot-version=v1.0	5.51	4	4	5	799	89.0996	7.1958	1.01914	1.09273		1.05593	0.964541	0.968989		0.966765	1.09223	0.136714
Ciclev10002859m	pacid=20787371 transcript=Ciclev10002859m locus=Ciclev10002859m.g ID=Ciclev10002859m.v1.0 annot-version=v1.0	30.33	3	4	24	122	13.366	5.52881		1.1274	1.15517	1.14128		1.25488	1.19253	1.2237	0.932648	0.137057
Ciclev10020679m	pacid=20811151 transcript=Ciclev10020679m locus=Ciclev10020620m.g ID=Ciclev10020679m.v1.0 annot-version=v1.0	29.65	8	8	104	371	39.937	7.32764	1.03734	0.888662	0.973584	0.96653	1.04473	1.03333	1.06786	1.04864	0.921698	0.137079
Ciclev10000887m	pacid=20789125 transcript=Ciclev10000887m locus=Ciclev10000887m.g ID=Ciclev10000887m.v1.0 annot-version=v1.0	17.44	5	5	13	516	56.2465	5.35107		1.09756	1.09631	1.09694		0.969575	1.04426	1.00692	1.08941	0.137487
Ciclev10006259m	pacid=20792027 transcript=Ciclev10006259m locus=Ciclev10006263m.g ID=Ciclev10006259m.v1.0 annot-version=v1.0	59.82	8	8	107	112	12.4055	9.68604	0.811236	0.976283	0.992368	0.926629	0.996344	1.06003	1.06981	1.04206	0.889227	0.137521
Ciclev10001524m	pacid=20786413 transcript=Ciclev10001524m locus=Ciclev10001524m.g ID=Ciclev10001524m.v1.0 annot-version=v1.0	40	13	13	82	375	42.3179	6.34131	1.06507	0.960118	0.894823	0.973338	1.04573	1.08688	1.07097	1.06786	0.911483	0.137541
Ciclev10033914m	pacid=20802816 transcript=Ciclev10033914m locus=Ciclev10033914m.g ID=Ciclev10033914m.v1.0 annot-version=v1.0	11.56	6	6	13	692	76.9777	8.60205	0.982885	0.836976	0.869573	0.896478	0.863494	0.765774	0.719298	0.782855	1.14514	0.137542
Ciclev10016020m	pacid=20819098 transcript=Ciclev10016020m locus=Ciclev10016020m.g ID=Ciclev10016020m.v1.0 annot-version=v1.0	43.41	7	12	67	311	34.9833	6.0874	1.00459	1.05703	1.32033	1.12732	0.908933	0.919184	0.992132	0.940083	1.19917	0.137789
Ciclev10005897m	pacid=20790791 transcript=Ciclev10005897m locus=Ciclev10005897m.g ID=Ciclev10005897m.v1.0 annot-version=v1.0	17.48	3	3	85	206	22.7823	6.26514	1.21375	1.38675	1.24969	1.2834	1.37376	1.64183	1.39495	1.47018	0.872951	0.137805
Ciclev10028962m	pacid=20812456 transcript=Ciclev10028962m locus=Ciclev10028962m.g ID=Ciclev10028962m.v1.0 annot-version=v1.0	4.11	1	1	2	292	33.447	8.5874	1.06018		1.09954	1.07986	0.949312		0.770287	0.859799	1.25595	0.138346
Ciclev10028138m	pacid=20813926 transcript=Ciclev10028138m locus=Ciclev10028138m.g ID=Ciclev10028138m.v1.0 annot-version=v1.0	5.87	4	4	10	545	59.0482	8.47021	1.05098	0.853478	0.895216	0.933224	1.14727	0.966659	1.2246	1.11284	0.838594	0.138391
Ciclev10003424m	pacid=20788645 transcript=Ciclev10003424m locus=Ciclev10003424m.g ID=Ciclev10003424m.v1.0 annot-version=v1.0	32.43	2	2	27	74	8.42917	4.70361	1.20384	1.08701	1.07461	1.12182	0.986242	1.07126	1.04132	1.03294	1.08605	0.138398
Ciclev10002945m	pacid=20789172 transcript=Ciclev10002945m locus=Ciclev10002945m.g ID=Ciclev10002945m.v1.0 annot-version=v1.0	59.18	4	4	22	98	10.3345	9.59814	0.989973	0.922991	0.927927	0.946964	1.02611	0.989455	1.19373	1.06976	0.885208	0.138401
Ciclev10013131m	pacid=20796947 transcript=Ciclev10013131m locus=Ciclev10013131m.g ID=Ciclev10013131m.v1.0 annot-version=v1.0	33.33	1	4	64	120	13.7378	11.5024	0.976736	1.25052	1.19084	1.13937	1.03781	0.956178	0.710475	0.901486	1.26387	0.138453
Ciclev10003083m	pacid=20786537 transcript=Ciclev10003083m locus=Ciclev10003083m.g ID=Ciclev10003083m.v1.0 annot-version=v1.0	77.08	2	3	15	48	5.03273	9.99365	0.94528	0.739155	0.82766	0.837365	0.955185	0.923997	0.971464	0.950215	0.881237	0.13946
Ciclev10014467m	pacid=20816905 transcript=Ciclev10014467m locus=Ciclev10014467m.g ID=Ciclev10014467m.v1.0 annot-version=v1.0	3.16	2	2	3	696	78.5579	8.80713		0.634878	0.552287	0.593583		0.500618	0.4875	0.494059	1.20144	0.140299
Ciclev10032751m	pacid=20804746 transcript=Ciclev10032751m locus=Ciclev10032751m.g ID=Ciclev10032751m.v1.0 annot-version=v1.0	34.45	5	5	12	209	23.1702	8.11865	1.04174	1.10429	1.08049	1.07551	0.928871	1.02221	1.05007	1.00038	1.07509	0.140361
Ciclev10028382m	pacid=20812784 transcript=Ciclev10028382m locus=Ciclev10028382m.g ID=Ciclev10028382m.v1.0 annot-version=v1.0	47.2	17	17	191	464	50.5954	7.28369	0.948056	0.945675	1.01537	0.969699	1.03514	0.993103	1.11629	1.04818	0.925131	0.140402
Ciclev10021997m	pacid=20808991 transcript=Ciclev10021997m locus=Ciclev10021681m.g ID=Ciclev10021997m.v1.0 annot-version=v1.0	29.54	5	7	67	237	25.6718	8.44092	0.892489	1.05213	0.984448	0.976356	0.999949	1.19414	1.14376	1.11262	0.877532	0.140715
Ciclev10031047m	pacid=20802535 transcript=Ciclev10031047m locus=Ciclev10031047m.g ID=Ciclev10031047m.v1.0 annot-version=v1.0	32.54	8	16	65	587	65.7082	5.09717	0.891119	0.964021	0.903647	0.919596	1.05452	0.924588	1.03311	1.00407	0.915868	0.14075
Ciclev10030780m	pacid=20802873 transcript=Ciclev10030780m locus=Ciclev10030661m.g ID=Ciclev10030780m.v1.0 annot-version=v1.0	7.16	4	4	9	754	85.3414	5.56689	0.760055	0.780013	0.986632	0.842233	1.01254	0.919735	1.04019	0.990824	0.850033	0.140775
Ciclev10019146m	pacid=20809091 transcript=Ciclev10019146m locus=Ciclev10019146m.g ID=Ciclev10019146m.v1.0 annot-version=v1.0	4.69	3	3	6	683	77.8801	9.33447	1.03522	1.09748	0.905578	1.01276	0.959093	0.863406	0.856602	0.893034	1.13407	0.141563
Ciclev10021139m	pacid=20806557 transcript=Ciclev10021139m locus=Ciclev10020286m.g ID=Ciclev10021139m.v1.0 annot-version=v1.0	9.54	3	3	9	325	37.3074	5.51611	0.890764	0.910902		0.900833	0.939264	0.961625	1.03975	0.980213	0.919018	0.141665
Ciclev10027830m	pacid=20813163 transcript=Ciclev10027830m locus=Ciclev10027830m.g ID=Ciclev10027830m.v1.0 annot-version=v1.0	11.11	7	8	21	819	93.7276	6.12549	0.948386	0.925852	0.883607	0.919282	0.987178	1.0318	0.930403	0.983127	0.935059	0.141742
Ciclev10015585m	pacid=20816256 transcript=Ciclev10015585m locus=Ciclev10015585m.g ID=Ciclev10015585m.v1.0 annot-version=v1.0	3.39	1	2	26	384	42.1804	7.97217	1.01656	0.847048	0.912864	0.925492	1.05232	0.991013	1.02015	1.02116	0.906314	0.14205
Ciclev10026205m	pacid=20799795 transcript=Ciclev10026205m locus=Ciclev10026205m.g ID=Ciclev10026205m.v1.0 annot-version=v1.0	30.1	7	8	30	289	31.7652	6.45557	1.15904	1.07381	1.04332	1.09206	0.960923	0.96125	1.07413	0.998768	1.0934	0.142409
Ciclev10008010m	pacid=20795156 transcript=Ciclev10008010m locus=Ciclev10008010m.g ID=Ciclev10008010m.v1.0 annot-version=v1.0	44.12	20	21	112	519	59.3768	9.23193	1.01857	1.09783	1.09232	1.06957	1.06384	1.28516	1.30083	1.21661	0.879138	0.142429
Ciclev10006291m	pacid=20792547 transcript=Ciclev10006291m locus=Ciclev10006291m.g ID=Ciclev10006291m.v1.0 annot-version=v1.0	33.01	3	3	15	103	11.208	9.75928	0.881401	0.814938	0.85081	0.84905	0.886297	0.872649	0.932284	0.897077	0.946463	0.14243
Ciclev10022366m	pacid=20811462 transcript=Ciclev10022366m locus=Ciclev10022366m.g ID=Ciclev10022366m.v1.0 annot-version=v1.0	31.79	4	7	19	195	21.8366	6.53662	1.0645		1.03816	1.05133	1.10402		1.08103	1.09252	0.962293	0.142531
Ciclev10007693m	pacid=20795371 transcript=Ciclev10007693m locus=Ciclev10007694m.g ID=Ciclev10007693m.v1.0 annot-version=v1.0	18.2	9	10	21	654	70.9407	8.55811	0.961129	1.1446	1.30181	1.13585	0.958076	0.915041	0.985028	0.952715	1.19222	0.142606
Ciclev10015584m	pacid=20816329 transcript=Ciclev10015584m locus=Ciclev10015584m.g ID=Ciclev10015584m.v1.0 annot-version=v1.0	8.85	3	3	5	384	42.5135	6.48096		0.929775	0.875335	0.902555		1.00218	0.96208	0.982132	0.918976	0.14282
Ciclev10011406m	pacid=20798787 transcript=Ciclev10011406m locus=Ciclev10011406m.g ID=Ciclev10011406m.v1.0 annot-version=v1.0	30.98	7	18	117	552	60.013	8.93896	0.87707	0.881809	0.91485	0.891243	0.887745	1.00728	0.998156	0.964394	0.924148	0.14301
Ciclev10016769m	pacid=20816265 transcript=Ciclev10016769m locus=Ciclev10016769m.g ID=Ciclev10016769m.v1.0 annot-version=v1.0	40.5	5	6	32	200	21.7699	7.13721	1.08815	1.09729	1.07618	1.0872	1.08029	1.07218	1.05106	1.06784	1.01813	0.143029
Ciclev10028773m	pacid=20814783 transcript=Ciclev10028773m locus=Ciclev10028761m.g ID=Ciclev10028773m.v1.0 annot-version=v1.0	37.13	11	11	43	342	37.8717	8.26514	1.09734	0.937251	1.01183	1.01548	1.14957	1.13931	1.05653	1.11514	0.910626	0.143275
Ciclev10001978m	pacid=20788452 transcript=Ciclev10001978m locus=Ciclev10001978m.g ID=Ciclev10001978m.v1.0 annot-version=v1.0	12.25	3	3	5	302	32.8805	9.24658	1.02565	0.999155	0.882908	0.969237	0.891985	0.906356	0.757528	0.851956	1.13766	0.143442
Ciclev10000939m	pacid=20787933 transcript=Ciclev10000939m locus=Ciclev10000939m.g ID=Ciclev10000939m.v1.0 annot-version=v1.0	23.79	8	9	31	496	53.6444	5.40186	0.97713	1.44434	1.27218	1.23122	0.936366	1.00395	1.00036	0.980227	1.25605	0.143461
Ciclev10015940m	pacid=20818124 transcript=Ciclev10015940m locus=Ciclev10015940m.g ID=Ciclev10015940m.v1.0 annot-version=v1.0	3.73	1	1	3	322	34.5973	8.14795	1.33018	1.1504	1.22665	1.23574	1.01436	1.07765	1.20199	1.098	1.12545	0.143498
Ciclev10022376m	pacid=20810712 transcript=Ciclev10022376m locus=Ciclev10022376m.g ID=Ciclev10022376m.v1.0 annot-version=v1.0	67.01	6	12	175	194	21.9158	9.67139	0.958775	1.08832	0.992093	1.01306	0.981914	0.889319	0.905202	0.925478	1.09464	0.14352
Ciclev10028011m	pacid=20812952 transcript=Ciclev10028011m locus=Ciclev10028011m.g ID=Ciclev10028011m.v1.0 annot-version=v1.0	12.32	5	6	19	633	70.412	6.16357	0.833222	1.03905		0.936136	1.26647	1.15502		1.21075	0.773189	0.14353
Ciclev10013712m	pacid=20798389 transcript=Ciclev10013712m locus=Ciclev10013712m.g ID=Ciclev10013712m.v1.0 annot-version=v1.0	9.4	3	3	8	468	53.4143	7.18115	0.87822	0.898887	0.84425	0.873786	0.915161	1.01005	0.901385	0.942197	0.927391	0.14367
Ciclev10006154m	pacid=20791906 transcript=Ciclev10006154m locus=Ciclev10006154m.g ID=Ciclev10006154m.v1.0 annot-version=v1.0	66.22	9	9	46	148	16.5235	6.22705	0.994291	1.13317	1.1082	1.07856	0.972763	1.03569	0.963998	0.990817	1.08855	0.143712
Ciclev10032786m	pacid=20804305 transcript=Ciclev10032786m locus=Ciclev10032786m.g ID=Ciclev10032786m.v1.0 annot-version=v1.0	57.5	9	9	81	200	22.5029	8.85107	0.952632	0.997398	1.00288	0.984304	0.99483	1.06888	1.03429	1.03267	0.953166	0.143893
Ciclev10020636m	pacid=20806634 transcript=Ciclev10020636m locus=Ciclev10020636m.g ID=Ciclev10020636m.v1.0 annot-version=v1.0	53.85	20	20	132	377	42.5002	6.48096	0.990689	0.902796	0.983473	0.958986	1.00588	1.02483	1.00373	1.01148	0.948103	0.144098
Ciclev10025868m	pacid=20799359 transcript=Ciclev10025868m locus=Ciclev10025868m.g ID=Ciclev10025868m.v1.0 annot-version=v1.0	20.95	7	8	37	377	40.1928	4.58936	0.923544	0.970969	0.907021	0.933845	1.0293	1.02191	0.939006	0.996739	0.9369	0.144258
Ciclev10031754m	pacid=20803920 transcript=Ciclev10031754m locus=Ciclev10031744m.g ID=Ciclev10031754m.v1.0 annot-version=v1.0	36.04	17	17	109	394	43.4729	7.51807	1.00326	1.04106	1.02974	1.02468	1.02394	1.10371	1.10054	1.07607	0.95225	0.144471
Ciclev10001333m	pacid=20789187 transcript=Ciclev10001333m locus=Ciclev10001333m.g ID=Ciclev10001333m.v1.0 annot-version=v1.0	11.98	5	5	8	409	43.1839	6.46826	0.881238	1.04899	0.899699	0.943309	0.769355	0.88769	0.830033	0.829026	1.13785	0.14459
Ciclev10003624m	pacid=20786507 transcript=Ciclev10003624m locus=Ciclev10003624m.g ID=Ciclev10003624m.v1.0 annot-version=v1.0	11.96	2	2	4	184	20.7696	9.39307	1.23803	1.34555	1.41554	1.33304	1.05975	1.25449	1.24272	1.18565	1.12431	0.144742
Ciclev10026774m	pacid=20800573 transcript=Ciclev10026774m locus=Ciclev10026774m.g ID=Ciclev10026774m.v1.0 annot-version=v1.0	19.35	1	2	5	124	13.0516	8.19189	0.795271	0.920343	0.911086	0.875567	0.888238	1.07079	1.18759	1.04887	0.83477	0.14519
Ciclev10004983m	pacid=20791871 transcript=Ciclev10004983m locus=Ciclev10004983m.g ID=Ciclev10004983m.v1.0 annot-version=v1.0	56.95	24	24	153	439	51.6312	6.13818	0.930878	0.945069	0.928887	0.934945	1.07708	1.01173	0.936954	1.00859	0.926985	0.145407
Ciclev10004438m	pacid=20790983 transcript=Ciclev10004438m locus=Ciclev10004438m.g ID=Ciclev10004438m.v1.0 annot-version=v1.0	19.64	12	12	67	718	79.6785	8.19189	0.958332	0.942318	0.874561	0.92507	0.96288	0.998091	0.96596	0.975644	0.948164	0.145564
Ciclev10004927m	pacid=20791536 transcript=Ciclev10004927m locus=Ciclev10004927m.g ID=Ciclev10004927m.v1.0 annot-version=v1.0	22.2	8	11	26	464	51.926	8.80713	1.00041	1.09439	1.14234	1.07905	1.17515	1.18107	1.12561	1.16061	0.929724	0.145735
Ciclev10012455m	pacid=20798846 transcript=Ciclev10012455m locus=Ciclev10012455m.g ID=Ciclev10012455m.v1.0 annot-version=v1.0	11.03	3	3	8	272	28.4234	5.63037	1.05606	1.20354	1.08359	1.11439	1.07315	0.967585	1.00614	1.01563	1.09725	0.145735
Ciclev10004853m	pacid=20792345 transcript=Ciclev10004853m locus=Ciclev10004853m.g ID=Ciclev10004853m.v1.0 annot-version=v1.0	10.93	4	4	14	485	53.6192	9.1001	0.97832	1.12373	1.01245	1.03817	1.00456	0.780561	0.905967	0.897029	1.15734	0.145753
Ciclev10005921m	pacid=20792152 transcript=Ciclev10005921m locus=Ciclev10005921m.g ID=Ciclev10005921m.v1.0 annot-version=v1.0	4.98	1	1	3	201	22.6989	10.2134	1.09394	1.00323	0.985019	1.0274	1.38384	1.08706	1.13869	1.2032	0.853888	0.145852
Ciclev10010146m	pacid=20794564 transcript=Ciclev10010146m locus=Ciclev10010146m.g ID=Ciclev10010146m.v1.0 annot-version=v1.0	5	4	4	8	1000	113.061	6.91748		0.964982	0.85024	0.907611		0.71653	0.786533	0.751531	1.20768	0.145893
Ciclev10019380m	pacid=20810660 transcript=Ciclev10019380m locus=Ciclev10019380m.g ID=Ciclev10019380m.v1.0 annot-version=v1.0	56.22	25	25	113	603	66.7473	7.26904	0.964984	0.947076	0.939608	0.950556	0.951	0.992412	0.999346	0.980919	0.969047	0.146212
Ciclev10016067m	pacid=20816691 transcript=Ciclev10016067m locus=Ciclev10016067m.g ID=Ciclev10016067m.v1.0 annot-version=v1.0	8.88	2	2	3	304	32.7834	6.12549	0.986386		1.14286	1.06462	0.800437		0.899605	0.850021	1.25247	0.146448
Ciclev10026321m	pacid=20799787 transcript=Ciclev10026321m locus=Ciclev10026073m.g ID=Ciclev10026321m.v1.0 annot-version=v1.0	37.5	8	8	33	256	28.1743	5.30029	0.982608	1.035	1.22033	1.07931	0.998959	0.884907	0.925281	0.936383	1.15264	0.146475
Ciclev10004921m	pacid=20789793 transcript=Ciclev10004921m locus=Ciclev10004921m.g ID=Ciclev10004921m.v1.0 annot-version=v1.0	1.5	1	1	3	466	53.555	9.18799		1.07442	0.94391	1.00917		0.872855	0.8097	0.841278	1.19956	0.146549
Ciclev10009604m	pacid=20793464 transcript=Ciclev10009604m locus=Ciclev10009604m.g ID=Ciclev10009604m.v1.0 annot-version=v1.0	5.29	1	1	2	189	20.7843	4.98291	0.828676		0.885745	0.85721	0.704088		0.783641	0.743864	1.15237	0.146593
Ciclev10009998m	pacid=20793160 transcript=Ciclev10009998m locus=Ciclev10009993m.g ID=Ciclev10009998m.v1.0 annot-version=v1.0	19.61	1	2	8	102	11.0545	9.08545		1.0718	1.68975	1.38078		0.670227	0.660606	0.665417	2.07506	0.146633
Ciclev10009347m	pacid=20795449 transcript=Ciclev10009347m locus=Ciclev10009061m.g ID=Ciclev10009347m.v1.0 annot-version=v1.0	21.61	3	3	22	236	25.7863	8.22119		1.26797	1.15753	1.21275		1.05626	1.09686	1.07656	1.12651	0.146655
Ciclev10001095m	pacid=20787052 transcript=Ciclev10001095m locus=Ciclev10001095m.g ID=Ciclev10001095m.v1.0 annot-version=v1.0	13.1	4	7	35	458	52.0219	5.73193	1.01705	0.946886	1.10011	1.02135	1.08553	1.11574	1.10621	1.1025	0.926397	0.146853
Ciclev10032612m	pacid=20803982 transcript=Ciclev10032612m locus=Ciclev10032233m.g ID=Ciclev10032612m.v1.0 annot-version=v1.0	13.87	3	4	8	238	27.5355	4.94482	0.854813	0.959964		0.907389	0.962299	1.1504	1.08225	1.06498	0.852022	0.147182
Ciclev10009495m	pacid=20794228 transcript=Ciclev10009495m locus=Ciclev10009486m.g ID=Ciclev10009495m.v1.0 annot-version=v1.0	15.46	3	3	10	207	23.3107	5.46533	1.04111	1.06992	1.23693	1.11599	1.01186	0.890562	1.03681	0.979745	1.13906	0.147234
Ciclev10011233m	pacid=20797652 transcript=Ciclev10011233m locus=Ciclev10011233m.g ID=Ciclev10011233m.v1.0 annot-version=v1.0	7.72	3	3	11	674	74.9812	7.13721	0.97354	1.04496	1.04893	1.02248	0.903515	0.955717	1.00405	0.954427	1.0713	0.147678
Ciclev10021787m	pacid=20809817 transcript=Ciclev10021787m locus=Ciclev10021787m.g ID=Ciclev10021787m.v1.0 annot-version=v1.0	22.87	6	6	15	258	28.4636	9.62744	1.07993	0.886353	1.02176	0.996014	0.92484	0.817574	0.89317	0.878528	1.13373	0.147696
Ciclev10014528m	pacid=20815760 transcript=Ciclev10014528m locus=Ciclev10014310m.g ID=Ciclev10014528m.v1.0 annot-version=v1.0	18.73	12	12	33	662	76.8597	7.31299	0.865157	0.852818	0.932208	0.883395	0.917057	0.94332	1.05932	0.973233	0.907691	0.147935
Ciclev10019637m	pacid=20809916 transcript=Ciclev10019637m locus=Ciclev10019637m.g ID=Ciclev10019637m.v1.0 annot-version=v1.0	51.3	22	22	146	538	60.0688	9.42236	1.06257	1.02331	1.08888	1.05826	1.21083	1.07064	1.13359	1.13835	0.929637	0.148273
Ciclev10015698m	pacid=20817478 transcript=Ciclev10015698m locus=Ciclev10015698m.g ID=Ciclev10015698m.v1.0 annot-version=v1.0	24.24	8	8	17	363	41.0261	6.21436	1.04986	0.994487	1.27294	1.10576	0.99941	0.90206	0.934148	0.945206	1.16986	0.14829
Ciclev10023252m	pacid=20809478 transcript=Ciclev10023252m locus=Ciclev10023252m.g ID=Ciclev10023252m.v1.0 annot-version=v1.0	12.28	1	1	6	57	6.1221	9.31982		0.911747	0.940363	0.926055		1.20205	1.03626	1.11916	0.827457	0.1486
Ciclev10025717m	pacid=20801392 transcript=Ciclev10025717m locus=Ciclev10025717m.g ID=Ciclev10025717m.v1.0 annot-version=v1.0	26.99	12	12	50	415	46.3229	6.66846	1.05477	1.15221	0.990462	1.06582	0.931486	0.943612	1.0253	0.9668	1.10242	0.148895
Ciclev10021692m	pacid=20807389 transcript=Ciclev10021692m locus=Ciclev10021692m.g ID=Ciclev10021692m.v1.0 annot-version=v1.0	11.94	3	3	5	268	29.9234	9.14404	0.946776	0.870363	1.02132	0.946152	0.951645	1.17523	1.16719	1.09802	0.861688	0.149287
Ciclev10019860m	pacid=20809573 transcript=Ciclev10019860m locus=Ciclev10019860m.g ID=Ciclev10019860m.v1.0 annot-version=v1.0	42.8	20	20	107	493	54.4799	6.93213	1.01376	0.902161	0.85945	0.925124	1.06207	0.967983	1.03238	1.02081	0.906264	0.149551
Ciclev10015115m	pacid=20815474 transcript=Ciclev10015115m locus=Ciclev10015115m.g ID=Ciclev10015115m.v1.0 annot-version=v1.0	12.47	5	5	9	473	52.3305	8.27979	0.724752	0.866503	0.825616	0.805624	0.827982	0.986115	0.939568	0.917889	0.877692	0.149601
Ciclev10025975m	pacid=20801137 transcript=Ciclev10025975m locus=Ciclev10025975m.g ID=Ciclev10025975m.v1.0 annot-version=v1.0	10.86	2	3	10	350	38.0956	6.56592		1.08512	1.34114	1.21313		0.79825	0.949177	0.873714	1.38847	0.149776
Ciclev10014814m	pacid=20815168 transcript=Ciclev10014814m locus=Ciclev10014814m.g ID=Ciclev10014814m.v1.0 annot-version=v1.0	31.99	13	16	50	547	61.4667	6.87354	1.02646	0.994684	1.04937	1.0235	1.13498	1.09666	1.02724	1.08629	0.942198	0.149818
Ciclev10032370m	pacid=20804545 transcript=Ciclev10032370m locus=Ciclev10032370m.g ID=Ciclev10032370m.v1.0 annot-version=v1.0	27.64	5	6	20	275	29.9601	10.3452	0.964948	1.00421	1.11899	1.02938	0.898186	0.835299	0.999597	0.911027	1.12991	0.149868
Ciclev10020582m	pacid=20810676 transcript=Ciclev10020582m locus=Ciclev10020582m.g ID=Ciclev10020582m.v1.0 annot-version=v1.0	37.6	10	16	208	383	43.4407	9.45166	0.991888	0.913004	0.920065	0.941652	0.98463	0.987393	1.10768	1.02657	0.917283	0.150003
Ciclev10012274m	pacid=20797214 transcript=Ciclev10012274m locus=Ciclev10012274m.g ID=Ciclev10012274m.v1.0 annot-version=v1.0	39.03	5	11	87	310	33.18	6.44287	0.962315	0.864451	0.975252	0.934006	0.993125	0.980307	1.03298	1.00214	0.932015	0.150731
Ciclev10021868m	pacid=20809594 transcript=Ciclev10021868m locus=Ciclev10021868m.g ID=Ciclev10021868m.v1.0 annot-version=v1.0	15.66	4	4	19	249	27.9641	5.08447		1.10656	1.00319	1.05487	0.966298	0.980638	0.990044	0.978994	1.07751	0.150764
Ciclev10011296m	pacid=20797561 transcript=Ciclev10011296m locus=Ciclev10011296m.g ID=Ciclev10011296m.v1.0 annot-version=v1.0	28.73	20	21	144	623	70.2209	7.92822	0.975058	0.881201	0.868714	0.908325	0.994499	0.990857	0.940664	0.97534	0.93129	0.150843
Ciclev10018900m	pacid=20810953 transcript=Ciclev10018900m locus=Ciclev10018900m.g ID=Ciclev10018900m.v1.0 annot-version=v1.0	2.86	2	2	3	805	90.2345	8.04541	1.19803	1.16484	1.06165	1.1415	1.12032	1.00906	0.935511	1.02163	1.11734	0.150926
Ciclev10023952m	pacid=20808188 transcript=Ciclev10023952m locus=Ciclev10023952m.g ID=Ciclev10023952m.v1.0 annot-version=v1.0	40.24	6	6	18	164	18.9006	5.26221	1.08643	0.868488	1.01868	0.991198	1.02671	1.20251	1.21545	1.14822	0.863247	0.151079
Ciclev10027515m	pacid=20800924 transcript=Ciclev10027515m locus=Ciclev10027515m.g ID=Ciclev10027515m.v1.0 annot-version=v1.0	31.58	5	6	58	285	30.6889	5.90967	1.28298	1.31775	1.45109	1.35061	1.33504	1.13879	1.02227	1.16537	1.15895	0.151456
Ciclev10028841m	pacid=20812836 transcript=Ciclev10028841m locus=Ciclev10028844m.g ID=Ciclev10028841m.v1.0 annot-version=v1.0	15.58	5	5	25	321	35.753	6.69775	1.0914	1.1055	1.12103	1.10597	1.10261	1.06789	1.07542	1.08197	1.02218	0.151934
Ciclev10022211m	pacid=20810798 transcript=Ciclev10022211m locus=Ciclev10022211m.g ID=Ciclev10022211m.v1.0 annot-version=v1.0	33.33	6	6	39	213	23.2107	7.94287	1.43882	1.34094	1.3475	1.37575	1.36559	2.05112	1.77977	1.73216	0.794239	0.152133
Ciclev10016852m	pacid=20819014 transcript=Ciclev10016852m locus=Ciclev10016852m.g ID=Ciclev10016852m.v1.0 annot-version=v1.0	40.43	5	5	45	188	19.8716	5.43994	1.08704	0.989592	0.876911	0.984514	1.05626	1.10714	1.13267	1.09869	0.896079	0.152536
Ciclev10016642m	pacid=20816280 transcript=Ciclev10016642m locus=Ciclev10016175m.g ID=Ciclev10016642m.v1.0 annot-version=v1.0	3.21	1	1	2	218	24.9257	7.04932	0.906827	0.922448		0.914638	0.895823	0.897885		0.896854	1.01983	0.152569
Ciclev10032720m	pacid=20802845 transcript=Ciclev10032720m locus=Ciclev10032720m.g ID=Ciclev10032720m.v1.0 annot-version=v1.0	10.19	2	2	8	216	24.7946	6.18896	0.991	1.34834	1.13043	1.15659	0.974325	0.953943	0.988891	0.972386	1.18944	0.152651
Ciclev10028040m	pacid=20813151 transcript=Ciclev10028040m locus=Ciclev10028040m.g ID=Ciclev10028040m.v1.0 annot-version=v1.0	16.69	8	8	16	611	66.1762	6.17627	1.05852	0.872193	1.00439	0.978371	0.904481	0.840519	0.881299	0.875433	1.11758	0.152818
Ciclev10030161m	pacid=20814511 transcript=Ciclev10030161m locus=Ciclev10030161m.g ID=Ciclev10030161m.v1.0 annot-version=v1.0	23.56	21	21	65	900	98.242	5.63037	0.969115	0.998306	1.01843	0.995284	0.954394	0.959195	0.983167	0.965585	1.03076	0.152892
Ciclev10022398m	pacid=20811188 transcript=Ciclev10022398m locus=Ciclev10022404m.g ID=Ciclev10022398m.v1.0 annot-version=v1.0	59.69	8	10	94	191	22.0419	9.74463	1.07731	0.94756	1.14055	1.05514	1.029	0.868859	0.80286	0.900241	1.17206	0.152987
Ciclev10014439m	pacid=20819192 transcript=Ciclev10014439m locus=Ciclev10014439m.g ID=Ciclev10014439m.v1.0 annot-version=v1.0	17.16	12	13	40	711	77.8498	7.53271	0.965126	0.81715	0.828949	0.870408	1.0512	0.928591	0.951108	0.976966	0.89093	0.153593
Ciclev10033083m	pacid=20804008 transcript=Ciclev10033083m locus=Ciclev10033083m.g ID=Ciclev10033083m.v1.0 annot-version=v1.0	39.02	2	7	152	123	14.3475	11.1509	0.865727	0.766626	0.869689	0.834014	1.00691	0.863938	0.914573	0.928473	0.898263	0.153641
Ciclev10000311m	pacid=20787914 transcript=Ciclev10000311m locus=Ciclev10000311m.g ID=Ciclev10000311m.v1.0 annot-version=v1.0	22.15	13	15	53	808	90.9744	5.43994	1.07848	1.19168	1.03887	1.10301	0.95429	1.06706	0.98922	1.00352	1.09913	0.153822
Ciclev10025458m	pacid=20801441 transcript=Ciclev10025458m locus=Ciclev10025458m.g ID=Ciclev10025458m.v1.0 annot-version=v1.0	26.52	10	10	33	494	54.8709	9.17334	0.983217	0.888776	0.83325	0.901748	1.21642	0.931684	1.04923	1.06578	0.846091	0.154209
Ciclev10013041m	pacid=20798641 transcript=Ciclev10013041m locus=Ciclev10012997m.g ID=Ciclev10013041m.v1.0 annot-version=v1.0	49.32	4	7	80	146	16.6203	6.68311	1.32674	1.01024	0.986175	1.10772	1.05144	0.726227	0.744078	0.840583	1.3178	0.154212
Ciclev10026742m	pacid=20799602 transcript=Ciclev10026742m locus=Ciclev10026742m.g ID=Ciclev10026742m.v1.0 annot-version=v1.0	37.5	3	8	90	136	15.2585	11.2974	0.859453	0.987345	1.04301	0.963269	0.900674	0.817006	0.859249	0.858976	1.12142	0.154317
Ciclev10011018m	pacid=20796611 transcript=Ciclev10011018m locus=Ciclev10011018m.g ID=Ciclev10011018m.v1.0 annot-version=v1.0	14.85	10	12	33	929	103.275	5.99854	0.982769	0.856654	0.920474	0.919966	0.992461	0.981956	0.978123	0.98418	0.934754	0.154712
Ciclev10017289m	pacid=20819312 transcript=Ciclev10017289m locus=Ciclev10017289m.g ID=Ciclev10017289m.v1.0 annot-version=v1.0	50	5	5	61	98	10.5718	8.93896	1.00087	0.854493	0.968172	0.941177	0.895784	0.794004	0.853876	0.847888	1.11003	0.154909
Ciclev10011521m	pacid=20796284 transcript=Ciclev10011521m locus=Ciclev10011521m.g ID=Ciclev10011521m.v1.0 annot-version=v1.0	9.06	4	4	11	508	58.8086	7.2251	0.911758	0.810677	0.972749	0.898395	0.946693	0.993321	1.04307	0.99436	0.90349	0.155053
Ciclev10026406m	pacid=20801448 transcript=Ciclev10026406m locus=Ciclev10026225m.g ID=Ciclev10026406m.v1.0 annot-version=v1.0	4.76	1	1	6	231	26.0657	9.93506	0.950434	0.934363	1.14501	1.00994	0.932574	0.807572	0.886897	0.875681	1.15332	0.155847
Ciclev10008383m	pacid=20794554 transcript=Ciclev10008383m locus=Ciclev10008383m.g ID=Ciclev10008383m.v1.0 annot-version=v1.0	48.48	21	21	164	427	48.1795	5.56689	0.996205	0.998269	0.97856	0.991011	1.04586	1.00748	1.00048	1.01794	0.973545	0.155874
Ciclev10008467m	pacid=20794698 transcript=Ciclev10008467m locus=Ciclev10008468m.g ID=Ciclev10008467m.v1.0 annot-version=v1.0	51.94	7	22	386	412	46.6609	5.68115	0.893544	0.916888	0.961698	0.924044	0.966307	1.1143	0.968487	1.01637	0.909164	0.155876
Ciclev10002714m	pacid=20787081 transcript=Ciclev10002714m locus=Ciclev10002714m.g ID=Ciclev10002714m.v1.0 annot-version=v1.0	41.82	5	5	68	165	18.4008	7.92822	1.12674	1.07261	1.10696	1.10211	1.06629	1.07337	1.08097	1.07354	1.02661	0.15595
Ciclev10028443m	pacid=20813790 transcript=Ciclev10028443m locus=Ciclev10028443m.g ID=Ciclev10028443m.v1.0 annot-version=v1.0	59.28	9	27	1599	447	49.2636	9.0708	0.765137	0.799218	0.888724	0.817693	1.02705	0.898787	0.857006	0.927615	0.8815	0.156226
Ciclev10029448m	pacid=20813143 transcript=Ciclev10029448m locus=Ciclev10029448m.g ID=Ciclev10029448m.v1.0 annot-version=v1.0	30.43	4	4	12	161	18.7348	7.79639	0.937605	0.857468	0.892873	0.895982	0.977517	0.90692	1.04708	0.977174	0.916912	0.15665
Ciclev10016420m	pacid=20815327 transcript=Ciclev10016420m locus=Ciclev10016420m.g ID=Ciclev10016420m.v1.0 annot-version=v1.0	22.76	5	5	21	246	27.9844	9.20264	0.987145	1.23093	1.15172	1.12326	1.02355	1.00468	0.948582	0.992271	1.13201	0.156678
Ciclev10029223m	pacid=20814236 transcript=Ciclev10029223m locus=Ciclev10029223m.g ID=Ciclev10029223m.v1.0 annot-version=v1.0	40.09	8	8	119	227	25.5005	4.94482	0.912549	0.895746	0.993903	0.934066	1.00984	0.960769	1.01258	0.994397	0.939329	0.156807
Ciclev10020449m	pacid=20810866 transcript=Ciclev10020449m locus=Ciclev10020449m.g ID=Ciclev10020449m.v1.0 annot-version=v1.0	6.98	2	3	14	401	43.4673	7.89893	0.95206	1.04103	0.886824	0.959972	0.960199	1.23715	1.18233	1.12656	0.852127	0.156849
Ciclev10004282m	pacid=20791481 transcript=Ciclev10004282m locus=Ciclev10004282m.g ID=Ciclev10004282m.v1.0 annot-version=v1.0	15.77	9	10	28	875	94.9346	5.19873	1.14657	1.02873	1.37466	1.18332	0.92483	0.98606	1.06711	0.992666	1.19206	0.156858
Ciclev10014721m	pacid=20817917 transcript=Ciclev10014721m locus=Ciclev10014721m.g ID=Ciclev10014721m.v1.0 annot-version=v1.0	47.17	23	23	188	583	63.2549	5.73193	0.981212	0.955117	0.955271	0.963866	1.00078	0.970669	0.984257	0.985236	0.97831	0.157035
Ciclev10010530m	pacid=20794770 transcript=Ciclev10010530m locus=Ciclev10010530m.g ID=Ciclev10010530m.v1.0 annot-version=v1.0	19.63	5	5	25	321	35.2052	7.04932	0.840636	0.919788	0.993687	0.918037	0.950715	1.05372	1.03183	1.01209	0.907071	0.157532
Ciclev10014348m	pacid=20816309 transcript=Ciclev10014348m locus=Ciclev10014348m.g ID=Ciclev10014348m.v1.0 annot-version=v1.0	13.4	8	8	16	776	85.5898	5.41455	1.72399	1.25341	1.19668	1.39136	1.05181	1.1019	1.13992	1.09788	1.26732	0.157574
Ciclev10004301m	pacid=20791306 transcript=Ciclev10004301m locus=Ciclev10004301m.g ID=Ciclev10004301m.v1.0 annot-version=v1.0	8.31	4	5	29	854	92.4855	6.3667	1.09849	1.17177	1.00339	1.09122	1.26388	1.39687	1.11152	1.25742	0.86782	0.157661
Ciclev10014571m	pacid=20817207 transcript=Ciclev10014571m locus=Ciclev10014571m.g ID=Ciclev10014571m.v1.0 annot-version=v1.0	12.91	7	8	15	643	71.6508	5.87158	1.05227	0.964649	1.04446	1.02046	1.06039	1.06011	1.11236	1.07762	0.946955	0.157744
Ciclev10028832m	pacid=20812233 transcript=Ciclev10028832m locus=Ciclev10028832m.g ID=Ciclev10028832m.v1.0 annot-version=v1.0	16.87	4	4	8	326	35.7294	5.41455		1.03838	1.03657	1.03748		0.856552	0.969299	0.912925	1.13643	0.157796
Ciclev10008979m	pacid=20794978 transcript=Ciclev10008979m locus=Ciclev10008979m.g ID=Ciclev10008979m.v1.0 annot-version=v1.0	18.59	5	5	12	312	35.1107	6.80029	1.01483	1.18499		1.09991	0.978534	0.998543	0.95465	0.977242	1.12552	0.157803
Ciclev10030905m	pacid=20803174 transcript=Ciclev10030905m locus=Ciclev10030905m.g ID=Ciclev10030905m.v1.0 annot-version=v1.0	16.74	10	10	29	663	74.1088	6.59521	0.93888	1.00087	0.926821	0.955522	0.987285	1.14349	1.01379	1.04819	0.911596	0.157915
Ciclev10015690m	pacid=20817250 transcript=Ciclev10015690m locus=Ciclev10015457m.g ID=Ciclev10015690m.v1.0 annot-version=v1.0	13.15	4	4	9	365	41.0873	6.7417	1.10616	1.2489		1.17753	0.986095	1.03568		1.01089	1.16484	0.158187
Ciclev10012148m	pacid=20796817 transcript=Ciclev10012148m locus=Ciclev10012148m.g ID=Ciclev10012148m.v1.0 annot-version=v1.0	2.68	1	1	2	336	36.7908	7.25439		0.754799	0.709474	0.732137		0.473161	0.630429	0.551795	1.32683	0.158393
Ciclev10016653m	pacid=20815509 transcript=Ciclev10016653m locus=Ciclev10016592m.g ID=Ciclev10016653m.v1.0 annot-version=v1.0	41.47	6	10	145	217	23.3798	5.04639	0.976376	0.939306	1.01658	0.977422	0.999126	1.03976	1.14045	1.05978	0.922288	0.15841
Ciclev10015257m	pacid=20816227 transcript=Ciclev10015257m locus=Ciclev10015257m.g ID=Ciclev10015257m.v1.0 annot-version=v1.0	7.45	2	2	4	443	49.8011	8.44092		1.23353	1.23704	1.23528		0.977104	1.13829	1.05769	1.1679	0.158467
Ciclev10006307m	pacid=20792376 transcript=Ciclev10006307m locus=Ciclev10006307m.g ID=Ciclev10006307m.v1.0 annot-version=v1.0	8.25	1	1	2	97	10.071	7.51807	1.10439		1.25383	1.17911	1.02003		0.865921	0.942973	1.25042	0.158796
Ciclev10021491m	pacid=20811472 transcript=Ciclev10021491m locus=Ciclev10021491m.g ID=Ciclev10021491m.v1.0 annot-version=v1.0	7.64	1	3	5	288	32.4605	5.45264		1.00105	1.07999	1.04052		0.832057	0.945414	0.888736	1.17079	0.159074
Ciclev10016662m	pacid=20815182 transcript=Ciclev10016662m locus=Ciclev10016662m.g ID=Ciclev10016662m.v1.0 annot-version=v1.0	3.7	1	1	3	216	24.3899	8.77783		1.21665	0.969788	1.09322		0.805927	0.835326	0.820627	1.33217	0.159598
Ciclev10016280m	pacid=20818293 transcript=Ciclev10016280m locus=Ciclev10016280m.g ID=Ciclev10016280m.v1.0 annot-version=v1.0	25.28	3	4	76	265	28.6904	5.43994	1.22702	1.31454	1.12689	1.22282	1.25694	1.39608	1.37398	1.34233	0.910963	0.159672
Ciclev10016660m	pacid=20818298 transcript=Ciclev10016660m locus=Ciclev10016270m.g ID=Ciclev10016660m.v1.0 annot-version=v1.0	5.56	1	1	2	216	23.4194	6.94678	1.25176		1.15934	1.20555	1.11157		1.03121	1.07139	1.12522	0.159819
Ciclev10019074m	pacid=20809999 transcript=Ciclev10019074m locus=Ciclev10019069m.g ID=Ciclev10019074m.v1.0 annot-version=v1.0	31.69	16	17	119	710	78.3854	5.09717	0.967178	0.89872	0.930811	0.932236	0.963113	0.977309	0.961717	0.96738	0.963672	0.159923
Ciclev10020364m	pacid=20810751 transcript=Ciclev10020364m locus=Ciclev10019636m.g ID=Ciclev10020364m.v1.0 annot-version=v1.0	11.11	4	4	15	414	45.0445	9.15869	0.924264	1.07279	1.33941	1.11215	0.892981	0.827606	0.958567	0.893051	1.24534	0.160072
Ciclev10012666m	pacid=20797355 transcript=Ciclev10012666m locus=Ciclev10012666m.g ID=Ciclev10012666m.v1.0 annot-version=v1.0	19.82	5	5	22	227	25.8073	9.49561	1.44094	1.03056	1.03955	1.17035	0.966719	0.923209	0.917412	0.93578	1.25067	0.160157
Ciclev10014538m	pacid=20816124 transcript=Ciclev10014538m locus=Ciclev10014538m.g ID=Ciclev10014538m.v1.0 annot-version=v1.0	5.46	5	5	7	659	72.2045	9.20264	0.856918		0.796809	0.826863	0.768344		0.732687	0.750515	1.10173	0.160518
Ciclev10011484m	pacid=20796575 transcript=Ciclev10011484m locus=Ciclev10011418m.g ID=Ciclev10011484m.v1.0 annot-version=v1.0	22.41	9	9	30	522	56.2679	6.80029	0.958402	1.05007	1.14795	1.05214	0.935829	0.970504	0.962572	0.956302	1.10022	0.160572
Ciclev10008716m	pacid=20795858 transcript=Ciclev10008716m locus=Ciclev10008716m.g ID=Ciclev10008716m.v1.0 annot-version=v1.0	32.51	8	8	25	366	39.4036	6.0874	1.03885	0.930468		0.984657	1.09135	1.12747		1.10941	0.887552	0.160604
Ciclev10007865m	pacid=20793511 transcript=Ciclev10007865m locus=Ciclev10007865m.g ID=Ciclev10007865m.v1.0 annot-version=v1.0	13.53	7	7	20	569	62.4729	7.53271	1.11743	1.353	1.1279	1.19944	1.10895	1.02163	1.04975	1.06011	1.13143	0.160657
Ciclev10007536m	pacid=20793199 transcript=Ciclev10007536m locus=Ciclev10007536m.g ID=Ciclev10007536m.v1.0 annot-version=v1.0	15.84	9	9	65	764	83.8229	6.02393	1.03576	1.03509	1.01291	1.02792	1.058	1.03132	1.08976	1.05969	0.970013	0.160718
Ciclev10002373m	pacid=20786345 transcript=Ciclev10002373m locus=Ciclev10002374m.g ID=Ciclev10002373m.v1.0 annot-version=v1.0	7.46	2	2	7	228	25.2353	8.67529	0.978368	0.994236	0.942685	0.971763	1.04935	1.11933	0.975092	1.04793	0.927319	0.161032
Ciclev10007484m	pacid=20793558 transcript=Ciclev10007484m locus=Ciclev10007483m.g ID=Ciclev10007484m.v1.0 annot-version=v1.0	51.24	26	38	504	806	92.2297	6.23975	1.19651	1.15119	1.28335	1.21035	1.26249	1.26706	1.33185	1.28713	0.940344	0.161545
Ciclev10031785m	pacid=20804798 transcript=Ciclev10031785m locus=Ciclev10031785m.g ID=Ciclev10031785m.v1.0 annot-version=v1.0	8.48	3	3	8	389	43.5003	7.47412	0.751654	0.881749	0.935096	0.856167	0.996798	0.944911	0.926852	0.956187	0.895397	0.16178
Ciclev10002035m	pacid=20788236 transcript=Ciclev10002035m locus=Ciclev10002035m.g ID=Ciclev10002035m.v1.0 annot-version=v1.0	30.61	8	8	29	294	32.6282	8.22119	1.1874	1.12827	1.22244	1.17937	1.06373	1.12944	1.15028	1.11448	1.05822	0.161925
Ciclev10011525m	pacid=20798341 transcript=Ciclev10011525m locus=Ciclev10011525m.g ID=Ciclev10011525m.v1.0 annot-version=v1.0	11.66	5	5	65	506	55.0736	5.30029	1.17827	1.15015	1.20432	1.17758	1.17767	1.32168	1.2626	1.25398	0.939073	0.162057
Ciclev10024399m	pacid=20808300 transcript=Ciclev10024399m locus=Ciclev10024399m.g ID=Ciclev10024399m.v1.0 annot-version=v1.0	6.46	4	5	5	758	85.306	6.65381	1.06549	1.02742		1.04646	1.08679	1.12827		1.10753	0.944855	0.162287
Ciclev10007940m	pacid=20795380 transcript=Ciclev10007940m locus=Ciclev10007940m.g ID=Ciclev10007940m.v1.0 annot-version=v1.0	9.26	5	5	9	540	59.1646	5.30029	1.45937	1.17627	1.31227	1.31597	1.06519	1.22726	1.17116	1.15454	1.13982	0.162951
Ciclev10030687m	pacid=20802548 transcript=Ciclev10030687m locus=Ciclev10030687m.g ID=Ciclev10030687m.v1.0 annot-version=v1.0	18.36	13	13	33	866	96.9336	5.07178	1.222	0.993535	1.51012	1.24189	0.938469	0.941592	1.05537	0.978478	1.2692	0.163045
Ciclev10022637m	pacid=20811203 transcript=Ciclev10022637m locus=Ciclev10022637m.g ID=Ciclev10022637m.v1.0 annot-version=v1.0	5.06	1	1	4	158	18.3825	9.02686	0.825003		0.813857	0.81943	0.890787		0.846583	0.868685	0.943299	0.163261
Ciclev10028026m	pacid=20813251 transcript=Ciclev10028026m locus=Ciclev10028026m.g ID=Ciclev10028026m.v1.0 annot-version=v1.0	4.98	3	4	5	623	71.0267	7.57666	0.800401	0.792638	0.981659	0.858232	0.881625	1.05462	1.11574	1.01733	0.843616	0.163803
Ciclev10014383m	pacid=20818179 transcript=Ciclev10014383m locus=Ciclev10014383m.g ID=Ciclev10014383m.v1.0 annot-version=v1.0	8.38	6	6	12	752	84.1965	5.66846	0.979315	0.886341	1.01616	0.960606	0.943364	0.810204	0.844627	0.866065	1.10916	0.163919
Ciclev10003044m	pacid=20786703 transcript=Ciclev10003044m locus=Ciclev10003044m.g ID=Ciclev10003044m.v1.0 annot-version=v1.0	24.66	3	3	6	73	8.14414	10.8286	0.993274	0.994958	0.803002	0.930411	0.848385	0.828468	0.764638	0.81383	1.14325	0.164137
Ciclev10019379m	pacid=20806734 transcript=Ciclev10019379m locus=Ciclev10019379m.g ID=Ciclev10019379m.v1.0 annot-version=v1.0	2.99	2	2	3	603	66.8859	6.15088	0.935827	0.94146		0.938643	1.04743	0.978549		1.01299	0.926609	0.164353
Ciclev10029116m	pacid=20813349 transcript=Ciclev10029116m locus=Ciclev10029116m.g ID=Ciclev10029116m.v1.0 annot-version=v1.0	18.97	4	4	7	253	26.9459	8.07471	0.893183		1.1686	1.03089	1.29266		1.4278	1.36023	0.757877	0.164881
Ciclev10010506m	pacid=20794266 transcript=Ciclev10010506m locus=Ciclev10010506m.g ID=Ciclev10010506m.v1.0 annot-version=v1.0	15.38	8	8	22	637	70.6321	6.75635	1.07694	0.994501	0.931397	1.00095	1.15416	1.03281	1.09485	1.09394	0.91499	0.164926
Ciclev10018738m	pacid=20807919 transcript=Ciclev10018738m locus=Ciclev10018738m.g ID=Ciclev10018738m.v1.0 annot-version=v1.0	15.84	10	11	21	953	106.161	6.45557	1.17084	1.21955		1.19519	0.90166	1.1114	1.09018	1.03441	1.15544	0.164971
Ciclev10029365m	pacid=20813120 transcript=Ciclev10029365m locus=Ciclev10029365m.g ID=Ciclev10029365m.v1.0 annot-version=v1.0	4.92	1	1	6	183	20.9328	8.41162	0.846991	1.10455	0.849473	0.933671	1.02789	1.13302	1.10327	1.08806	0.858108	0.16498
Ciclev10018887m	pacid=20811015 transcript=Ciclev10018887m locus=Ciclev10018887m.g ID=Ciclev10018887m.v1.0 annot-version=v1.0	35.3	4	30	387	813	90.3479	5.26221	0.767083	0.917169	0.863515	0.849256	0.777368	0.633592	0.794361	0.735107	1.15528	0.165072
Ciclev10012509m	pacid=20797674 transcript=Ciclev10012509m locus=Ciclev10012509m.g ID=Ciclev10012509m.v1.0 annot-version=v1.0	16.15	5	5	7	260	29.7331	10.1987	1.10051	1.08675	1.16454	1.11726	1.13402	0.916062	0.863939	0.97134	1.15023	0.165434
Ciclev10002597m	pacid=20785636 transcript=Ciclev10002597m locus=Ciclev10002597m.g ID=Ciclev10002597m.v1.0 annot-version=v1.0	55.61	7	11	231	187	20.9877	11.0483	0.910779	0.822696	0.953619	0.895698	0.959133	0.961736	0.962088	0.960986	0.932062	0.165599
Ciclev10011385m	pacid=20796231 transcript=Ciclev10011385m locus=Ciclev10011385m.g ID=Ciclev10011385m.v1.0 annot-version=v1.0	15.19	7	7	18	566	63.2082	5.021	0.990302	0.962082	0.915505	0.955963	0.98301	1.00033	0.998848	0.994064	0.961671	0.165655
Ciclev10025619m	pacid=20801911 transcript=Ciclev10025619m locus=Ciclev10025619m.g ID=Ciclev10025619m.v1.0 annot-version=v1.0	23.06	8	8	24	438	46.7488	8.41162	0.866456	0.920518	0.805521	0.864165	0.919311	0.937824	0.909264	0.922133	0.937137	0.165839
Ciclev10014977m	pacid=20818305 transcript=Ciclev10014977m locus=Ciclev10014977m.g ID=Ciclev10014977m.v1.0 annot-version=v1.0	43.17	13	22	155	505	54.4692	8.1333	1.17575	0.995605	1.01167	1.06101	0.948824	0.984619	0.951838	0.96176	1.1032	0.166073
Ciclev10025196m	pacid=20800426 transcript=Ciclev10025196m locus=Ciclev10025194m.g ID=Ciclev10025196m.v1.0 annot-version=v1.0	15.11	7	7	17	609	67.0635	7.91357	1.06112	1.10355		1.08233	0.970747	0.78322		0.876983	1.23416	0.16618
Ciclev10014858m	pacid=20816732 transcript=Ciclev10014858m locus=Ciclev10014858m.g ID=Ciclev10014858m.v1.0 annot-version=v1.0	10.88	5	5	16	533	59.9572	8.52881	1.04113	1.22587	0.975539	1.08085	1.11311	1.38089	1.30251	1.2655	0.854085	0.166241
Ciclev10011705m	pacid=20796624 transcript=Ciclev10011705m locus=Ciclev10011705m.g ID=Ciclev10011705m.v1.0 annot-version=v1.0	10.2	5	5	14	451	50.7894	6.78564	1.09984	1.13852	1.10131	1.11323	1.14876	1.13765	1.12573	1.13738	0.978761	0.166346
Ciclev10000959m	pacid=20788586 transcript=Ciclev10000959m locus=Ciclev10000742m.g ID=Ciclev10000959m.v1.0 annot-version=v1.0	5.93	3	3	3	489	55.1838	5.73193	0.862784	0.756863		0.809823	1.02586	0.91737		0.971616	0.833481	0.166413
Ciclev10014518m	pacid=20819061 transcript=Ciclev10014518m locus=Ciclev10014518m.g ID=Ciclev10014518m.v1.0 annot-version=v1.0	10.23	4	5	9	665	74.6389	7.56201	1.01479	1.1273	1.03246	1.05818	0.966885	0.973444	1.03021	0.99018	1.06868	0.166832
Ciclev10020078m	pacid=20809679 transcript=Ciclev10020078m locus=Ciclev10020078m.g ID=Ciclev10020078m.v1.0 annot-version=v1.0	10.68	4	4	8	459	51.1533	5.05908		0.941404	0.902424	0.921914		0.875184	0.883791	0.879488	1.04824	0.167429
Ciclev10027722m	pacid=20814764 transcript=Ciclev10027722m locus=Ciclev10027722m.g ID=Ciclev10027722m.v1.0 annot-version=v1.0	50.65	54	54	251	1082	121.368	5.57959	0.950864	0.943137	0.999913	0.964638	0.973441	1.01318	1.03911	1.00858	0.956433	0.167443
Ciclev10008908m	pacid=20795779 transcript=Ciclev10008908m locus=Ciclev10008908m.g ID=Ciclev10008908m.v1.0 annot-version=v1.0	17.74	5	5	8	327	35.8218	5.35107	1.00364	0.881143	0.985523	0.956767	0.941445	0.826348	0.833072	0.866955	1.1036	0.16768
Ciclev10016371m	pacid=20816091 transcript=Ciclev10016371m locus=Ciclev10016371m.g ID=Ciclev10016371m.v1.0 annot-version=v1.0	18.58	4	4	11	253	29.2238	11.561	0.84088	0.896602	0.834439	0.857307	0.928141	0.867268	0.912075	0.902495	0.94993	0.167734
Ciclev10005153m	pacid=20791921 transcript=Ciclev10005153m locus=Ciclev10004843m.g ID=Ciclev10005153m.v1.0 annot-version=v1.0	27.34	11	11	29	384	42.5192	5.2876	0.709193	0.914942	0.919653	0.847929	0.938921	0.967755	0.997394	0.968023	0.875939	0.167889
Ciclev10001114m	pacid=20786421 transcript=Ciclev10001114m locus=Ciclev10001114m.g ID=Ciclev10001114m.v1.0 annot-version=v1.0	32.67	13	16	62	453	47.937	7.44482	1.08048	1.19278	1.03189	1.10172	1.13546	1.22432	1.23195	1.19724	0.920214	0.168064
Ciclev10014449m	pacid=20818902 transcript=Ciclev10014449m locus=Ciclev10014449m.g ID=Ciclev10014449m.v1.0 annot-version=v1.0	33.85	17	19	55	703	76.7738	9.84717	0.958284	1.11146	1.12045	1.0634	0.976935	0.974448	0.973399	0.974928	1.09075	0.168069
Ciclev10012553m	pacid=20797992 transcript=Ciclev10012553m locus=Ciclev10012553m.g ID=Ciclev10012553m.v1.0 annot-version=v1.0	3.59	1	1	4	251	26.0435	6.62451	1.12166	0.853685	1.15817	1.0445	1.01792	0.508162	0.718932	0.748337	1.39577	0.16829
Ciclev10006177m	pacid=20790911 transcript=Ciclev10006177m locus=Ciclev10006177m.g ID=Ciclev10006177m.v1.0 annot-version=v1.0	49.29	9	9	182	140	15.005	10.4771	0.851274	0.724436	0.867074	0.814261	0.918206	0.84945	0.942058	0.903238	0.901491	0.16847
Ciclev10021747m	pacid=20807762 transcript=Ciclev10021747m locus=Ciclev10021747m.g ID=Ciclev10021747m.v1.0 annot-version=v1.0	7.28	2	2	8	261	29.5763	6.40479	0.957028	1.32019	1.01735	1.09819	0.866883	0.939335	0.912886	0.906368	1.21164	0.168702
Ciclev10004455m	pacid=20789756 transcript=Ciclev10004455m locus=Ciclev10004455m.g ID=Ciclev10004455m.v1.0 annot-version=v1.0	1	1	1	5	703	77.3779	5.36377	1.0657	1.18278	1.33206	1.19351	1.0388	1.10254	1.03641	1.05925	1.12675	0.168858
Ciclev10006852m	pacid=20789787 transcript=Ciclev10006852m locus=Ciclev10006852m.g ID=Ciclev10006852m.v1.0 annot-version=v1.0	41.67	8	8	131	204	23.5049	7.56201	1.08798	1.2869	1.03147	1.13545	1.01484	1.03069	0.953616	0.999717	1.13577	0.16889
Ciclev10010841m	pacid=20793328 transcript=Ciclev10010841m locus=Ciclev10010841m.g ID=Ciclev10010841m.v1.0 annot-version=v1.0	21.48	9	9	33	512	57.8701	6.96143	1.00166	1.1522	1.05037	1.06808	0.943843	1.03797	0.953406	0.978406	1.09165	0.168982
Ciclev10016930m	pacid=20817118 transcript=Ciclev10016930m locus=Ciclev10016930m.g ID=Ciclev10016930m.v1.0 annot-version=v1.0	16	2	2	20	175	19.6101	4.67822	1.11947	0.990652	0.85371	0.987943	1.08947	1.15085	1.11885	1.11973	0.882308	0.169558
Ciclev10002139m	pacid=20787719 transcript=Ciclev10002139m locus=Ciclev10002139m.g ID=Ciclev10002139m.v1.0 annot-version=v1.0	19.78	5	5	16	273	29.7639	6.88818	1.17113	1.00162	1.07389	1.08221	1.06168	0.770833	0.926174	0.919563	1.17688	0.169998
Ciclev10033452m	pacid=20802994 transcript=Ciclev10033452m locus=Ciclev10033452m.g ID=Ciclev10033452m.v1.0 annot-version=v1.0	9.95	4	5	13	573	64.5143	8.19189	0.663992	0.839102	0.753156	0.752083	0.709715	0.646577	0.602081	0.652791	1.1521	0.170032
Ciclev10022137m	pacid=20810401 transcript=Ciclev10022137m locus=Ciclev10022137m.g ID=Ciclev10022137m.v1.0 annot-version=v1.0	55.76	7	9	36	165	18.4532	5.70654	1.05848	1.00937	1.06825	1.04537	0.970058	1.04448	0.927397	0.980646	1.066	0.170273
Ciclev10031681m	pacid=20802469 transcript=Ciclev10031681m locus=Ciclev10031681m.g ID=Ciclev10031681m.v1.0 annot-version=v1.0	23.11	4	8	26	411	44.7778	6.75635	1.0034	1.03575	1.02577	1.02164	0.890096	1.00986	0.97902	0.95966	1.06458	0.170635
Ciclev10014361m	pacid=20815316 transcript=Ciclev10014361m locus=Ciclev10014361m.g ID=Ciclev10014361m.v1.0 annot-version=v1.0	8.36	5	5	11	766	83.7625	5.98584	1.21171	1.13836		1.17503	1.10634	1.04999		1.07816	1.08985	0.171224
Ciclev10007244m	pacid=20795864 transcript=Ciclev10007244m locus=Ciclev10007244m.g ID=Ciclev10007244m.v1.0 annot-version=v1.0	13.32	20	20	60	1472	166.502	5.71924	0.935167	0.95492	1.00288	0.964321	1.06198	1.11501	0.961477	1.04615	0.921778	0.17231
Ciclev10022218m	pacid=20809718 transcript=Ciclev10022218m locus=Ciclev10022218m.g ID=Ciclev10022218m.v1.0 annot-version=v1.0	12.68	3	3	5	213	23.6502	9.68604	0.694075	0.935084		0.814579	1.05648	1.32467		1.19057	0.684192	0.172346
Ciclev10018373m	pacid=20816566 transcript=Ciclev10018373m locus=Ciclev10018373m.g ID=Ciclev10018373m.v1.0 annot-version=v1.0	10.77	2	2	8	130	14.866	8.92432	1.25713	1.19276	1.11924	1.18971	1.1082	1.15684	1.0688	1.11128	1.07058	0.172455
Ciclev10014605m	pacid=20816364 transcript=Ciclev10014605m locus=Ciclev10014605m.g ID=Ciclev10014605m.v1.0 annot-version=v1.0	23.04	14	14	56	625	69.8063	8.30908	0.964358	1.03643	0.997573	0.999455	1.04508	1.08464	1.01386	1.04786	0.953806	0.172822
Ciclev10004138m	pacid=20790217 transcript=Ciclev10004138m locus=Ciclev10004136m.g ID=Ciclev10004138m.v1.0 annot-version=v1.0	1.54	2	2	4	1620	172.57	9.5542		1.29819	1.10527	1.20173		1.02561	0.915303	0.970454	1.23832	0.172861
Ciclev10002449m	pacid=20786674 transcript=Ciclev10002449m locus=Ciclev10002449m.g ID=Ciclev10002449m.v1.0 annot-version=v1.0	24.3	4	4	12	214	23.7363	8.39697	1.01315	1.01129	0.953318	0.992584	0.989921	0.881265	0.921217	0.930801	1.06638	0.173139
Ciclev10014055m	pacid=20815251 transcript=Ciclev10014055m locus=Ciclev10014054m.g ID=Ciclev10014055m.v1.0 annot-version=v1.0	16.08	17	17	41	1312	146.532	6.06201	0.934366	1.02766	0.994697	0.985576	0.965064	0.927659	0.896585	0.92977	1.06002	0.173424
Ciclev10010581m	pacid=20794961 transcript=Ciclev10010581m locus=Ciclev10010581m.g ID=Ciclev10010581m.v1.0 annot-version=v1.0	17.63	5	15	40	902	99.0022	5.24951	0.826803	1.05212	1.16502	1.01465	1.08259	1.27119	1.2758	1.20986	0.838652	0.173543
Ciclev10016842m	pacid=20815649 transcript=Ciclev10016842m locus=Ciclev10016842m.g ID=Ciclev10016842m.v1.0 annot-version=v1.0	13.76	2	2	8	189	19.558	7.59131		1.07572	1.03746	1.05659		1.09881	1.09426	1.09654	0.963571	0.173818
Ciclev10010749m	pacid=20792814 transcript=Ciclev10010749m locus=Ciclev10010749m.g ID=Ciclev10010749m.v1.0 annot-version=v1.0	45.12	23	23	129	492	56.1842	6.29053	1.02025	1.09001	0.881324	0.997195	1.07411	1.08816	1.16081	1.10769	0.900245	0.174259
Ciclev10023189m	pacid=20811316 transcript=Ciclev10023189m locus=Ciclev10023189m.g ID=Ciclev10023189m.v1.0 annot-version=v1.0	9.72	1	1	3	72	8.17937	10.9604		1.26363	1.29332	1.27848		1.22233	1.12605	1.17419	1.08881	0.17429
Ciclev10024181m	pacid=20811268 transcript=Ciclev10024181m locus=Ciclev10024181m.g ID=Ciclev10024181m.v1.0 annot-version=v1.0	3.18	1	1	2	314	35.4911	9.34912	0.944223	0.991857		0.96804	0.924167	0.907571		0.915869	1.05696	0.174491
Ciclev10018865m	pacid=20810753 transcript=Ciclev10018865m locus=Ciclev10018865m.g ID=Ciclev10018865m.v1.0 annot-version=v1.0	55.61	35	36	299	829	92.7833	6.30322	0.893198	0.910721	0.892476	0.898798	0.891333	0.971924	0.962107	0.941788	0.954353	0.174585
Ciclev10014242m	pacid=20815806 transcript=Ciclev10014242m locus=Ciclev10014242m.g ID=Ciclev10014242m.v1.0 annot-version=v1.0	16.08	10	11	19	858	94.0381	5.69385	0.946176	0.933362	0.880635	0.920057	0.933833	0.967314	1.02977	0.976974	0.941742	0.174674
Ciclev10001453m	pacid=20788226 transcript=Ciclev10001453m locus=Ciclev10001453m.g ID=Ciclev10001453m.v1.0 annot-version=v1.0	48.33	8	22	287	389	44.5067	10.0962	0.827328	1.03079	0.920109	0.926075	0.971793	1.06748	1.07084	1.0367	0.893287	0.174941
Ciclev10030242m	pacid=20812156 transcript=Ciclev10030242m locus=Ciclev10030242m.g ID=Ciclev10030242m.v1.0 annot-version=v1.0	2.57	2	2	7	661	74.3496	7.47412	1.53955	1.10721	0.892548	1.17977	1.0158	0.763707	0.714287	0.831264	1.41925	0.175442
Ciclev10025549m	pacid=20800857 transcript=Ciclev10025549m locus=Ciclev10025549m.g ID=Ciclev10025549m.v1.0 annot-version=v1.0	41.85	16	16	104	466	51.4628	5.64307	0.97357	0.977024	0.940407	0.963667	0.938511	0.955241	0.926486	0.940079	1.02509	0.175453
Ciclev10015678m	pacid=20817485 transcript=Ciclev10015678m locus=Ciclev10015678m.g ID=Ciclev10015678m.v1.0 annot-version=v1.0	47.28	8	17	245	368	39.0463	9.23193	0.879354	0.936832	0.947766	0.921317	0.917983	1.0288	1.02368	0.990153	0.93048	0.175652
Ciclev10004263m	pacid=20789922 transcript=Ciclev10004263m locus=Ciclev10004263m.g ID=Ciclev10004263m.v1.0 annot-version=v1.0	10.4	7	8	22	933	101.237	6.62451	0.9624	0.849934	0.853949	0.888761	0.918701	0.991668	0.965284	0.958551	0.927192	0.176452
Ciclev10000267m	pacid=20789064 transcript=Ciclev10000267m locus=Ciclev10000267m.g ID=Ciclev10000267m.v1.0 annot-version=v1.0	10.41	6	7	19	845	95.015	6.7417	0.825138	0.958794	1.04922	0.944384	1.06472	1.07155	1.02473	1.05367	0.896284	0.176703
Ciclev10017243m	pacid=20819298 transcript=Ciclev10017243m locus=Ciclev10017243m.g ID=Ciclev10017243m.v1.0 annot-version=v1.0	17.7	3	3	17	113	12.6725	8.42627	1.1011	0.942365	1.05695	1.03347	1.28954	1.06689	1.14093	1.16578	0.886502	0.176713
Ciclev10016123m	pacid=20816630 transcript=Ciclev10016123m locus=Ciclev10016123m.g ID=Ciclev10016123m.v1.0 annot-version=v1.0	32.76	4	9	37	293	34.0418	8.44092	0.852416	0.921394	1.00597	0.926593	0.909599	0.735587	0.804078	0.816421	1.13494	0.17711
Ciclev10005452m	pacid=20791950 transcript=Ciclev10005452m locus=Ciclev10005452m.g ID=Ciclev10005452m.v1.0 annot-version=v1.0	8.15	2	3	4	319	35.7243	8.73389	1.26437	0.926473		1.09542	0.774836	0.713174		0.744005	1.47233	0.177354
Ciclev10018719m	pacid=20805954 transcript=Ciclev10018719m locus=Ciclev10018719m.g ID=Ciclev10018719m.v1.0 annot-version=v1.0	53.25	32	50	389	969	110.937	6.55127	0.949402	0.970211	0.979743	0.966452	0.968169	0.998578	1.02795	0.998232	0.968163	0.177513
Ciclev10027987m	pacid=20814173 transcript=Ciclev10027987m locus=Ciclev10027988m.g ID=Ciclev10027987m.v1.0 annot-version=v1.0	9.91	5	5	19	646	71.6766	6.23975	0.932287	0.966193	0.920055	0.939512	0.98749	0.947828	1.06567	1.00033	0.939203	0.178034
Ciclev10006024m	pacid=20789836 transcript=Ciclev10006024m locus=Ciclev10006024m.g ID=Ciclev10006024m.v1.0 annot-version=v1.0	44.69	5	10	150	179	19.7158	9.5835	0.920213	0.901859	0.937147	0.91974	0.966394	0.924889	0.944935	0.945406	0.972851	0.178081
Ciclev10025379m	pacid=20800473 transcript=Ciclev10025379m locus=Ciclev10025379m.g ID=Ciclev10025379m.v1.0 annot-version=v1.0	9.9	4	4	12	515	57.6984	6.0874	1.00315	1.0787	0.939288	1.00705	0.931768	0.801579	0.969885	0.901077	1.1176	0.178148
Ciclev10022955m	pacid=20807533 transcript=Ciclev10022955m locus=Ciclev10022955m.g ID=Ciclev10022955m.v1.0 annot-version=v1.0	88.29	11	11	94	111	12.7225	5.59229	1.07008	1.0606	1.08591	1.0722	1.07313	1.03585	1.00561	1.0382	1.03275	0.178709
Ciclev10012459m	pacid=20799185 transcript=Ciclev10012459m locus=Ciclev10012459m.g ID=Ciclev10012459m.v1.0 annot-version=v1.0	56.83	13	13	124	271	29.5584	8.20654	1.06069	1.12916	1.12259	1.10415	1.08331	1.2969	1.29279	1.22433	0.901838	0.17883
Ciclev10025395m	pacid=20801007 transcript=Ciclev10025395m locus=Ciclev10025395m.g ID=Ciclev10025395m.v1.0 annot-version=v1.0	3.33	2	2	6	511	55.591	8.07471		1.2405	1.14752	1.19401		0.95598	1.09381	1.0249	1.16501	0.17891
Ciclev10027856m	pacid=20813618 transcript=Ciclev10027856m locus=Ciclev10027856m.g ID=Ciclev10027856m.v1.0 annot-version=v1.0	8.44	6	6	16	782	84.5505	7.00537	1.23369	1.28993	1.62783	1.38382	1.14277	1.12694	1.25122	1.17364	1.17908	0.178932
Ciclev10022230m	pacid=20811793 transcript=Ciclev10022230m locus=Ciclev10022230m.g ID=Ciclev10022230m.v1.0 annot-version=v1.0	4.72	1	1	18	212	21.244	6.85889	0.825574	0.970682	0.834827	0.877028	0.882438	1.04547	1.07266	1.00019	0.876862	0.178995
Ciclev10029231m	pacid=20814275 transcript=Ciclev10029231m locus=Ciclev10028976m.g ID=Ciclev10029231m.v1.0 annot-version=v1.0	2.65	1	1	4	226	25.6435	6.7124		0.891933	0.730334	0.811133		0.988079	0.965368	0.976724	0.830463	0.179552
Ciclev10011157m	pacid=20798143 transcript=Ciclev10011157m locus=Ciclev10011157m.g ID=Ciclev10011157m.v1.0 annot-version=v1.0	6.41	2	5	10	733	85.2605	7.7085	1.15809	0.875509	1.0191	1.01756	0.925038	0.824441	0.881138	0.876872	1.16045	0.17964
Ciclev10004572m	pacid=20791466 transcript=Ciclev10004572m locus=Ciclev10004572m.g ID=Ciclev10004572m.v1.0 annot-version=v1.0	60.2	31	32	333	608	65.827	7.86963	0.96738	1.04018	0.984989	0.997516	0.954665	0.943224	0.977247	0.958379	1.04084	0.179701
Ciclev10004659m	pacid=20789919 transcript=Ciclev10004659m locus=Ciclev10004659m.g ID=Ciclev10004659m.v1.0 annot-version=v1.0	14.34	6	6	14	558	62.6869	7.40088	0.883001	1.2646	1.14022	1.09594	0.927921	2.96139	2.40169	2.097	0.522623	0.179901
Ciclev10013737m	pacid=20799077 transcript=Ciclev10013737m locus=Ciclev10013737m.g ID=Ciclev10013737m.v1.0 annot-version=v1.0	6.51	4	4	6	799	88.5991	6.75635	0.924913	1.06267	0.936636	0.974741	1.15486	1.06353	1.00643	1.07494	0.906785	0.179968
Ciclev10012229m	pacid=20796888 transcript=Ciclev10012229m locus=Ciclev10012229m.g ID=Ciclev10012229m.v1.0 annot-version=v1.0	16.98	5	5	15	318	34.5891	6.771	1.05108	0.996309	1.0151	1.02083	1.00296	0.876603	0.978972	0.952846	1.07135	0.180392
Ciclev10016057m	pacid=20818528 transcript=Ciclev10016057m locus=Ciclev10016057m.g ID=Ciclev10016057m.v1.0 annot-version=v1.0	16.07	4	4	24	305	32.8263	9.45166	0.953555	0.904918	1.0494	0.969291	0.977635	1.26021	1.11688	1.11824	0.866798	0.18059
Ciclev10023301m	pacid=20807455 transcript=Ciclev10023301m locus=Ciclev10023301m.g ID=Ciclev10023301m.v1.0 annot-version=v1.0	2.44	1	1	2	369	40.4761	5.16064	0.813377	0.672719		0.743048	0.882487	0.888179		0.885333	0.839287	0.180614
Ciclev10018546m	pacid=20811080 transcript=Ciclev10018546m locus=Ciclev10018546m.g ID=Ciclev10018546m.v1.0 annot-version=v1.0	21.99	13	20	58	1237	133.864	6.82959	0.790484	0.946474	0.98978	0.908913	0.957444	1.05493	1.04433	1.0189	0.892051	0.180793
Ciclev10022735m	pacid=20811068 transcript=Ciclev10022735m locus=Ciclev10022728m.g ID=Ciclev10022735m.v1.0 annot-version=v1.0	59.72	6	9	80	144	15.8664	10.0376	1.08466	1.01828	1.05477	1.05257	1.0402	0.954534	1.0097	1.00148	1.05102	0.180941
Ciclev10030438m	pacid=20813258 transcript=Ciclev10030438m locus=Ciclev10030438m.g ID=Ciclev10030438m.v1.0 annot-version=v1.0	39.22	3	3	12	102	10.3733	11.7222	0.739706		0.793233	0.76647	0.714195		0.649564	0.68188	1.12405	0.181345
Ciclev10000656m	pacid=20786199 transcript=Ciclev10000656m locus=Ciclev10000656m.g ID=Ciclev10000656m.v1.0 annot-version=v1.0	13.66	5	7	23	593	65.8666	7.10791	0.974253	1.09433	1.11215	1.06024	0.988179	0.926463	1.01859	0.977743	1.08438	0.181609
Ciclev10000602m	pacid=20786359 transcript=Ciclev10000602m locus=Ciclev10000602m.g ID=Ciclev10000602m.v1.0 annot-version=v1.0	18.9	11	11	45	619	71.3438	5.37646	0.802489	0.985162	0.918413	0.902021	0.97111	0.977736	1.03175	0.993531	0.907895	0.181942
Ciclev10028705m	pacid=20812868 transcript=Ciclev10028705m locus=Ciclev10028706m.g ID=Ciclev10028705m.v1.0 annot-version=v1.0	42.94	10	13	46	361	40.3592	6.55127	0.921331	0.984031	1.00532	0.970228	0.985547	1.02581	1.0558	1.02238	0.948985	0.182729
Ciclev10030987m	pacid=20805493 transcript=Ciclev10030987m locus=Ciclev10030987m.g ID=Ciclev10030987m.v1.0 annot-version=v1.0	9.8	6	6	15	612	66.3497	6.87354	1.00263	0.882912	1.18227	1.0226	0.943233	0.830479	0.839032	0.870914	1.17417	0.18277
Ciclev10012700m	pacid=20797731 transcript=Ciclev10012700m locus=Ciclev10012700m.g ID=Ciclev10012700m.v1.0 annot-version=v1.0	27.15	4	5	19	221	24.8101	9.37842	1.0751	1.04522	1.004	1.04144	1.06529	1.22437	1.09205	1.12724	0.923891	0.182897
Ciclev10009615m	pacid=20793042 transcript=Ciclev10009615m locus=Ciclev10009615m.g ID=Ciclev10009615m.v1.0 annot-version=v1.0	8.56	2	2	4	187	20.4366	8.83643	1.15772		1.32316	1.24044	0.944534		1.09214	1.01834	1.2181	0.18303
Ciclev10015390m	pacid=20815041 transcript=Ciclev10015390m locus=Ciclev10015390m.g ID=Ciclev10015390m.v1.0 annot-version=v1.0	5.05	2	2	3	416	46.7261	7.63525	1.06421	1.14833		1.10627	1.00615	1.03104		1.01859	1.08607	0.183656
Ciclev10028940m	pacid=20814055 transcript=Ciclev10028940m locus=Ciclev10028940m.g ID=Ciclev10028940m.v1.0 annot-version=v1.0	7.74	2	2	7	297	34.2168	8.95361	1.00375	1.0218	1.30798	1.11118	1.00693	0.904496	0.924221	0.945215	1.17558	0.183797
Ciclev10021239m	pacid=20808936 transcript=Ciclev10021239m locus=Ciclev10021239m.g ID=Ciclev10021239m.v1.0 annot-version=v1.0	13.65	3	3	10	315	35.0056	6.63916	0.833647	0.896492	0.867339	0.865826	0.870459	0.77361	0.778413	0.807494	1.07224	0.184013
Ciclev10011785m	pacid=20798644 transcript=Ciclev10011785m locus=Ciclev10011785m.g ID=Ciclev10011785m.v1.0 annot-version=v1.0	44.99	10	16	279	429	47.4408	8.1333	0.996839	0.805413	0.921403	0.907885	1.01798	0.952497	1.06101	1.01049	0.898458	0.184079
Ciclev10028700m	pacid=20814630 transcript=Ciclev10028700m locus=Ciclev10028700m.g ID=Ciclev10028700m.v1.0 annot-version=v1.0	34.43	10	10	44	366	38.169	8.25049	0.884614	0.930704		0.907659	0.947454	0.973426		0.96044	0.945044	0.184133
Ciclev10026305m	pacid=20800324 transcript=Ciclev10026305m locus=Ciclev10026305m.g ID=Ciclev10026305m.v1.0 annot-version=v1.0	29.01	6	7	26	262	28.8792	9.43701	1.35071	1.10251	1.12348	1.19223	0.895863	1.18313	0.907765	0.995585	1.19752	0.185023
Ciclev10019245m	pacid=20811035 transcript=Ciclev10019245m locus=Ciclev10019245m.g ID=Ciclev10019245m.v1.0 annot-version=v1.0	36.8	18	22	92	644	70.8406	9.40771	0.906857	0.927774	0.9598	0.931477	0.860073	0.892123	0.925435	0.892544	1.04362	0.185126
Ciclev10000531m	pacid=20788787 transcript=Ciclev10000531m locus=Ciclev10000531m.g ID=Ciclev10000531m.v1.0 annot-version=v1.0	28.46	3	19	401	657	72.8458	5.35107	1.37473		1.21863	1.29668	1.02083		1.15887	1.08985	1.18978	0.18553
Ciclev10031983m	pacid=20804958 transcript=Ciclev10031983m locus=Ciclev10031983m.g ID=Ciclev10031983m.v1.0 annot-version=v1.0	59.25	9	15	139	346	39.004	6.7417	0.963853	0.864677	0.927951	0.918827	0.890374	0.70616	0.855952	0.817495	1.12395	0.186023
Ciclev10026474m	pacid=20800998 transcript=Ciclev10026474m locus=Ciclev10026474m.g ID=Ciclev10026474m.v1.0 annot-version=v1.0	4.69	1	1	5	213	23.8001	10.0376	1.31511	1.2699	1.24572	1.27691	1.31418	1.01137	0.864832	1.06346	1.20071	0.186034
Ciclev10032464m	pacid=20802379 transcript=Ciclev10032464m locus=Ciclev10032464m.g ID=Ciclev10032464m.v1.0 annot-version=v1.0	20.53	4	4	10	263	28.8509	5.18604	1.08788	1.30099	1.03453	1.14113	0.952748	0.926847	1.08744	0.98901	1.15381	0.186077
Ciclev10019489m	pacid=20808813 transcript=Ciclev10019489m locus=Ciclev10019406m.g ID=Ciclev10019489m.v1.0 annot-version=v1.0	66.26	29	29	347	572	64.2076	7.06396	1.03024	1.12179	1.02734	1.05979	1.06838	1.16345	1.15532	1.12905	0.938654	0.186103
Ciclev10025131m	pacid=20800922 transcript=Ciclev10025131m locus=Ciclev10025131m.g ID=Ciclev10025131m.v1.0 annot-version=v1.0	12.99	6	6	14	639	69.0504	4.729	1.03192	1.32667	1.07556	1.14472	1.05255	1.00235	0.866606	0.973837	1.17547	0.186577
Ciclev10005909m	pacid=20792367 transcript=Ciclev10005909m locus=Ciclev10005909m.g ID=Ciclev10005909m.v1.0 annot-version=v1.0	32.84	2	7	81	204	23.9513	11.4292	1.07153	0.927061	0.944332	0.980975	0.970785	0.831114	0.82863	0.876843	1.11876	0.186737
Ciclev10005593m	pacid=20790837 transcript=Ciclev10005593m locus=Ciclev10005565m.g ID=Ciclev10005593m.v1.0 annot-version=v1.0	15.83	5	5	10	278	30.9604	6.15088	0.99193	0.955084	0.883582	0.943532	1.01329	0.976742	1.00078	0.996935	0.946433	0.186813
Ciclev10019562m	pacid=20811916 transcript=Ciclev10019562m locus=Ciclev10019562m.g ID=Ciclev10019562m.v1.0 annot-version=v1.0	41.3	21	21	187	552	61.4725	7.18115	0.991214	1.02765	1.033	1.01729	1.0078	1.10091	1.1175	1.0754	0.94596	0.187303
Ciclev10014607m	pacid=20817604 transcript=Ciclev10014607m locus=Ciclev10014607m.g ID=Ciclev10014607m.v1.0 annot-version=v1.0	5.44	3	3	5	625	70.4768	6.84424	1.07823		1.00275	1.04049	0.931814		0.976341	0.954077	1.09057	0.187362
Ciclev10016099m	pacid=20816867 transcript=Ciclev10016099m locus=Ciclev10016099m.g ID=Ciclev10016099m.v1.0 annot-version=v1.0	50.84	13	13	220	299	32.0335	9.43701	1.01914	1.05229	0.984349	1.01859	0.976945	1.00676	0.952287	0.978662	1.0408	0.187611
Ciclev10015059m	pacid=20818301 transcript=Ciclev10015059m locus=Ciclev10015059m.g ID=Ciclev10015059m.v1.0 annot-version=v1.0	47.94	15	16	87	486	53.248	5.59229	0.948371	1.87547	1.16808	1.33064	0.846745	0.900778	0.909337	0.88562	1.5025	0.187667
Ciclev10015479m	pacid=20818539 transcript=Ciclev10015479m locus=Ciclev10015479m.g ID=Ciclev10015479m.v1.0 annot-version=v1.0	28.61	11	11	41	402	45.343	8.89502	0.890533	0.96499	0.909738	0.921754	0.935818	1.0011	0.967295	0.968069	0.952156	0.18803
Ciclev10009186m	pacid=20794673 transcript=Ciclev10009186m locus=Ciclev10009186m.g ID=Ciclev10009186m.v1.0 annot-version=v1.0	13.7	3	3	5	270	29.7049	6.26514		1.05538	1.01187	1.03363		0.86751	0.973924	0.920717	1.12263	0.188453
Ciclev10011043m	pacid=20798977 transcript=Ciclev10011043m locus=Ciclev10011043m.g ID=Ciclev10011043m.v1.0 annot-version=v1.0	1.02	1	1	2	882	100.972	7.23975	1.23124	1.24333		1.23728	1.0995	1.19199		1.14574	1.0799	0.18867
Ciclev10012508m	pacid=20798906 transcript=Ciclev10012508m locus=Ciclev10012508m.g ID=Ciclev10012508m.v1.0 annot-version=v1.0	68.58	9	19	313	261	29.7139	9.83252	1.02498	0.920634	0.93014	0.958584	1.06003	1.00804	0.99291	1.02033	0.939487	0.188749
Ciclev10001363m	pacid=20785925 transcript=Ciclev10001363m locus=Ciclev10001330m.g ID=Ciclev10001363m.v1.0 annot-version=v1.0	35.32	10	11	34	402	44.3453	5.46533	0.934172	1.00978	0.986661	0.976872	0.968689	1.0846	1.14768	1.06699	0.91554	0.188961
Ciclev10020325m	pacid=20806748 transcript=Ciclev10020325m locus=Ciclev10020325m.g ID=Ciclev10020325m.v1.0 annot-version=v1.0	21.24	6	6	22	419	48.6294	5.18604		0.906416	0.93921	0.922813		0.95408	0.996269	0.975175	0.946305	0.189089
Ciclev10021790m	pacid=20808292 transcript=Ciclev10021790m locus=Ciclev10021057m.g ID=Ciclev10021790m.v1.0 annot-version=v1.0	4.67	1	1	3	257	27.6996	6.69775	0.843876	1.07156	1.18213	1.03252	0.907556	0.710392	0.911892	0.84328	1.22441	0.189091
Ciclev10026618m	pacid=20800566 transcript=Ciclev10026618m locus=Ciclev10026618m.g ID=Ciclev10026618m.v1.0 annot-version=v1.0	13.37	2	2	3	172	18.7607	7.98682		1.20766	1.09325	1.15046		1.05105	1.0149	1.03298	1.11373	0.189292
Ciclev10014950m	pacid=20816782 transcript=Ciclev10014950m locus=Ciclev10014955m.g ID=Ciclev10014950m.v1.0 annot-version=v1.0	16.02	5	5	22	512	57.2536	7.63525	1.27698	1.09165	1.2429	1.20384	1.40625	1.47858	1.20213	1.36232	0.883669	0.189853
Ciclev10011266m	pacid=20798173 transcript=Ciclev10011266m locus=Ciclev10011266m.g ID=Ciclev10011266m.v1.0 annot-version=v1.0	25.55	12	12	34	642	71.6321	5.85889	0.996555	1.01573	0.925901	0.979396	0.960643	0.92724	0.860253	0.916045	1.06916	0.190308
Ciclev10030699m	pacid=20802908 transcript=Ciclev10030699m locus=Ciclev10030699m.g ID=Ciclev10030699m.v1.0 annot-version=v1.0	20.28	15	15	35	843	92.1591	8.06006	1.00204	1.00692	0.974193	0.994384	0.995978	1.05844	1.02649	1.02697	0.968268	0.190789
Ciclev10016053m	pacid=20818163 transcript=Ciclev10016053m locus=Ciclev10015838m.g ID=Ciclev10016053m.v1.0 annot-version=v1.0	10.46	3	3	9	306	32.345	7.00537	1.01371	0.884372		0.949042	0.835528	0.803142		0.819335	1.15831	0.191111
Ciclev10027979m	pacid=20813218 transcript=Ciclev10027979m locus=Ciclev10027979m.g ID=Ciclev10027979m.v1.0 annot-version=v1.0	7.85	4	4	4	650	72.7518	6.56592	0.993617		1.10297	1.04829	0.947565		0.815576	0.881571	1.18912	0.191144
Ciclev10018733m	pacid=20807129 transcript=Ciclev10018733m locus=Ciclev10018733m.g ID=Ciclev10018733m.v1.0 annot-version=v1.0	3.66	3	3	7	957	104.67	7.60596		0.979753	0.942547	0.96115		1.01684	0.992153	1.0045	0.956845	0.19169
Ciclev10011298m	pacid=20798154 transcript=Ciclev10011298m locus=Ciclev10011298m.g ID=Ciclev10011298m.v1.0 annot-version=v1.0	19.58	12	12	53	623	69.1534	5.36377	1.04938	1.01364	0.846118	0.969716	1.02975	1.08318	1.11202	1.07499	0.902073	0.191918
Ciclev10011536m	pacid=20798279 transcript=Ciclev10011536m locus=Ciclev10011536m.g ID=Ciclev10011536m.v1.0 annot-version=v1.0	19.48	8	9	21	503	56.003	9.23193	1.01849	1.15812	1.08396	1.08686	1.10069	0.899774	0.871427	0.957298	1.13534	0.192141
Ciclev10011738m	pacid=20797242 transcript=Ciclev10011738m locus=Ciclev10011738m.g ID=Ciclev10011738m.v1.0 annot-version=v1.0	13.86	4	5	11	440	48.8529	6.53662	0.969474	1.10129		1.03538	0.926163	0.840461		0.883312	1.17216	0.192731
Ciclev10014674m	pacid=20814988 transcript=Ciclev10014674m locus=Ciclev10014674m.g ID=Ciclev10014674m.v1.0 annot-version=v1.0	1.51	1	1	2	597	68.1128	5.73193		1.01479	0.875592	0.945193		1.07259	1.08855	1.08057	0.874717	0.193024
Ciclev10016224m	pacid=20818741 transcript=Ciclev10016224m locus=Ciclev10016224m.g ID=Ciclev10016224m.v1.0 annot-version=v1.0	33.09	7	7	48	275	30.1183	8.52881	1.15114	0.996938	1.10179	1.08329	1.03172	0.957419	1.02132	1.00349	1.07953	0.193078
Ciclev10025262m	pacid=20799938 transcript=Ciclev10025262m locus=Ciclev10025262m.g ID=Ciclev10025262m.v1.0 annot-version=v1.0	31.94	22	23	128	573	66.5127	5.87158	0.907742	0.83658	0.903233	0.882518	0.949548	0.927495	0.898608	0.925217	0.95385	0.19321
Ciclev10030990m	pacid=20803119 transcript=Ciclev10030990m locus=Ciclev10030990m.g ID=Ciclev10030990m.v1.0 annot-version=v1.0	21.02	9	12	30	609	69.1025	8.23584	0.960158	1.04571	0.915969	0.973945	1.09365	1.02407	1.01641	1.04471	0.932264	0.193442
Ciclev10026582m	pacid=20801516 transcript=Ciclev10026582m locus=Ciclev10026582m.g ID=Ciclev10026582m.v1.0 annot-version=v1.0	3.8	1	1	3	184	20.138	8.70459	1.1468	1.13833		1.14257	1.12151	1.1342		1.12785	1.01304	0.193746
Ciclev10007545m	pacid=20792756 transcript=Ciclev10007545m locus=Ciclev10007545m.g ID=Ciclev10007545m.v1.0 annot-version=v1.0	18.21	14	16	73	758	84.0838	5.93506	0.95204	0.957018	0.947708	0.952255	0.996851	0.94541	1.02877	0.990344	0.96154	0.194005
Ciclev10008695m	pacid=20796081 transcript=Ciclev10008695m locus=Ciclev10008695m.g ID=Ciclev10008695m.v1.0 annot-version=v1.0	20	5	5	26	370	40.566	6.40479	0.910671	0.835978	1.12317	0.956607	1.07038	1.28071	1.04903	1.13338	0.844034	0.194132
Ciclev10011327m	pacid=20797381 transcript=Ciclev10011327m locus=Ciclev10011329m.g ID=Ciclev10011327m.v1.0 annot-version=v1.0	17.72	7	7	26	604	67.0969	7.12256	0.897417	0.847183	1.15249	0.965698	0.781112	0.732535	0.890518	0.801389	1.20503	0.194135
Ciclev10016926m	pacid=20815784 transcript=Ciclev10016926m locus=Ciclev10016926m.g ID=Ciclev10016926m.v1.0 annot-version=v1.0	44.57	6	6	35	175	19.857	6.04932	0.991479	1.1202	1.05245	1.05471	1.01061	0.948982	1.00726	0.98895	1.06649	0.19432
Ciclev10010808m	pacid=20795663 transcript=Ciclev10010808m locus=Ciclev10010808m.g ID=Ciclev10010808m.v1.0 annot-version=v1.0	9.52	3	3	6	315	34	6.07471	0.925793	1.39145	1.11897	1.14541	0.915227	0.887488	0.987363	0.930026	1.23158	0.194416
Ciclev10012856m	pacid=20796870 transcript=Ciclev10012856m locus=Ciclev10012856m.g ID=Ciclev10012856m.v1.0 annot-version=v1.0	63.87	9	11	265	191	22.154	9.72998	0.971848	0.963278	1.07306	1.00273	0.97537	0.922156	0.928275	0.941933	1.06454	0.19455
Ciclev10008981m	pacid=20795730 transcript=Ciclev10008981m locus=Ciclev10008981m.g ID=Ciclev10008981m.v1.0 annot-version=v1.0	28.21	6	6	50	312	34.2941	6.85889		0.851298	0.880272	0.865785		0.89095	0.89784	0.894395	0.968012	0.194643
Ciclev10002356m	pacid=20788171 transcript=Ciclev10002356m locus=Ciclev10002356m.g ID=Ciclev10002356m.v1.0 annot-version=v1.0	22.41	4	6	54	232	24.8014	8.82178	1.13417	1.10271	1.07644	1.10444	1.04926	1.09712	0.949503	1.03196	1.07023	0.194673
Ciclev10000605m	pacid=20788343 transcript=Ciclev10000605m locus=Ciclev10000605m.g ID=Ciclev10000605m.v1.0 annot-version=v1.0	7.27	4	4	8	619	68.7872	7.98682	1.01129	1.15745	1.05216	1.07363	0.988592	1.0074	1.01818	1.00473	1.06858	0.195502
Ciclev10028993m	pacid=20812601 transcript=Ciclev10028993m locus=Ciclev10028993m.g ID=Ciclev10028993m.v1.0 annot-version=v1.0	5.59	1	1	4	286	31.9613	8.36768		1.02868	0.965266	0.996974		0.925845	0.802366	0.864105	1.15376	0.195671
Ciclev10023713m	pacid=20808856 transcript=Ciclev10023713m locus=Ciclev10023713m.g ID=Ciclev10023713m.v1.0 annot-version=v1.0	10.69	4	4	9	524	58.4454	8.85107		0.851113	0.9287	0.889906		0.970154	1.10195	1.03605	0.858941	0.196145
Ciclev10018249m	pacid=20814964 transcript=Ciclev10018249m locus=Ciclev10018249m.g ID=Ciclev10018249m.v1.0 annot-version=v1.0	2.55	1	1	3	314	33.5498	5.80811	1.11818		1.47203	1.29511	0.887714		0.996021	0.941868	1.37504	0.196455
Ciclev10001573m	pacid=20788740 transcript=Ciclev10001573m locus=Ciclev10001383m.g ID=Ciclev10001573m.v1.0 annot-version=v1.0	14.44	5	5	14	367	39.4774	6.44287	1.00775	1.14555	1.21068	1.12133	1.02458	1.04617	1.01165	1.02747	1.09135	0.196726
Ciclev10010043m	pacid=20792673 transcript=Ciclev10010043m locus=Ciclev10010043m.g ID=Ciclev10010043m.v1.0 annot-version=v1.0	43.82	4	4	12	89	10.5233	9.27588	1.04207	1.10204	0.99827	1.04746	1.01575	0.987878	0.813361	0.938996	1.11551	0.19676
Ciclev10026308m	pacid=20801012 transcript=Ciclev10026308m locus=Ciclev10026308m.g ID=Ciclev10026308m.v1.0 annot-version=v1.0	51.54	5	17	248	260	28.0708	10.7993	0.935391	1.03947	0.897472	0.957445	0.861887	0.891875	0.910872	0.888211	1.07795	0.196981
Ciclev10020843m	pacid=20807380 transcript=Ciclev10020843m locus=Ciclev10020843m.g ID=Ciclev10020843m.v1.0 annot-version=v1.0	25.07	1	9	31	355	40.4747	5.32568	1.03746	1.00397	0.978166	1.00653	1.0024	1.09664	1.21057	1.1032	0.912374	0.19731
Ciclev10016641m	pacid=20818227 transcript=Ciclev10016641m locus=Ciclev10016641m.g ID=Ciclev10016641m.v1.0 annot-version=v1.0	50.46	7	11	134	218	24.1002	5.73193	1.02328	1.0027	0.873839	0.966607	1.00741	1.06835	1.0574	1.04439	0.925525	0.197527
Ciclev10012060m	pacid=20798362 transcript=Ciclev10012060m locus=Ciclev10012060m.g ID=Ciclev10012060m.v1.0 annot-version=v1.0	29.58	10	10	48	355	40.3871	8.41162	1.09343	1.05738	1.05315	1.06799	1.13478	1.08805	1.07991	1.10091	0.97009	0.197755
Ciclev10031749m	pacid=20804973 transcript=Ciclev10031749m locus=Ciclev10031749m.g ID=Ciclev10031749m.v1.0 annot-version=v1.0	6.84	2	3	15	395	44.3495	6.11279		0.749168	0.675621	0.712394		0.480695	0.629259	0.554977	1.28365	0.197939
Ciclev10016549m	pacid=20815106 transcript=Ciclev10016549m locus=Ciclev10016549m.g ID=Ciclev10016549m.v1.0 annot-version=v1.0	21.83	5	5	30	229	25.2772	9.65674	0.966446	1.03546	1.00848	1.00346	0.995689	1.11385	1.09298	1.06751	0.940006	0.198348
Ciclev10011854m	pacid=20798905 transcript=Ciclev10011854m locus=Ciclev10011854m.g ID=Ciclev10011854m.v1.0 annot-version=v1.0	41.16	16	16	101	413	46.8219	5.80811	0.999282	0.901289	0.975319	0.95863	1.05905	0.964104	1.04614	1.0231	0.936986	0.19854
Ciclev10004381m	pacid=20792342 transcript=Ciclev10004381m locus=Ciclev10004381m.g ID=Ciclev10004381m.v1.0 annot-version=v1.0	14.82	10	11	69	769	82.564	8.17725	0.886092	0.923877	0.895822	0.90193	0.898884	0.840239	0.724187	0.821103	1.09844	0.198953
Ciclev10004832m	pacid=20791978 transcript=Ciclev10004832m locus=Ciclev10004832m.g ID=Ciclev10004832m.v1.0 annot-version=v1.0	7.93	3	3	10	492	55.3559	6.66846		1.11475	1.39343	1.25409		0.963718	1.01011	0.986913	1.27072	0.199111
Ciclev10019075m	pacid=20807286 transcript=Ciclev10019075m locus=Ciclev10019075m.g ID=Ciclev10019075m.v1.0 annot-version=v1.0	12.55	8	8	15	709	77.6523	4.53857	1.29024	0.895143	1.12405	1.10314	1.02677	0.753143	0.887993	0.889302	1.24046	0.199113
Ciclev10007553m	pacid=20795863 transcript=Ciclev10007553m locus=Ciclev10007553m.g ID=Ciclev10007553m.v1.0 annot-version=v1.0	34.22	9	19	44	754	82.2486	4.7417	1.03576	0.971961		1.00386	1.0269	1.27806	1.18785	1.16427	0.862223	0.199389
Ciclev10030663m	pacid=20803859 transcript=Ciclev10030663m locus=Ciclev10030660m.g ID=Ciclev10030663m.v1.0 annot-version=v1.0	7.05	2	5	32	893	102.58	6.06201	0.944072	0.780862		0.862467	1.04037	1.00156		1.02096	0.84476	0.199403
Ciclev10028340m	pacid=20813309 transcript=Ciclev10028340m locus=Ciclev10028340m.g ID=Ciclev10028340m.v1.0 annot-version=v1.0	29.85	11	11	19	479	51.3049	7.21045	1.07613	0.955119	1.13962	1.05696	0.97734	0.826991	1.00801	0.937445	1.12748	0.199438
Ciclev10000915m	pacid=20787245 transcript=Ciclev10000915m locus=Ciclev10000915m.g ID=Ciclev10000915m.v1.0 annot-version=v1.0	18.34	7	7	16	507	56.5788	7.1665	1.01624	0.85609	0.96001	0.944115	0.960795	1.11925	1.05444	1.04483	0.903609	0.200049
Ciclev10030917m	pacid=20804723 transcript=Ciclev10030917m locus=Ciclev10030917m.g ID=Ciclev10030917m.v1.0 annot-version=v1.0	5.19	1	3	9	655	69.5992	6.03662		0.691062	0.675346	0.683204		0.588277	0.653041	0.620659	1.10077	0.201325
Ciclev10009518m	pacid=20795291 transcript=Ciclev10009518m locus=Ciclev10009497m.g ID=Ciclev10009518m.v1.0 annot-version=v1.0	44.83	9	9	67	203	21.6589	6.69775	0.997418	1.14806	1.05136	1.06562	1.11809	1.14419	1.13972	1.134	0.939696	0.201589
Ciclev10015281m	pacid=20819040 transcript=Ciclev10015281m locus=Ciclev10015281m.g ID=Ciclev10015281m.v1.0 annot-version=v1.0	41.65	10	14	106	437	48.853	5.51611	0.921806	0.931691	0.996489	0.949995	1.02893	1.03135	0.951105	1.00379	0.946404	0.201734
Ciclev10020855m	pacid=20805919 transcript=Ciclev10020855m locus=Ciclev10020855m.g ID=Ciclev10020855m.v1.0 annot-version=v1.0	15.25	5	5	11	354	39.0938	6.02393	1.00285	2.19278	1.35558	1.51707	1.03558	0.814483	1.05097	0.967012	1.56883	0.202295
Ciclev10002883m	pacid=20788466 transcript=Ciclev10002883m locus=Ciclev10002883m.g ID=Ciclev10002883m.v1.0 annot-version=v1.0	18.26	2	2	15	115	12.5386	8.32373	1.08721	0.806732	0.926599	0.940179	0.853988	0.782501	0.800196	0.812229	1.15753	0.20257
Ciclev10013267m	pacid=20799196 transcript=Ciclev10013267m locus=Ciclev10013189m.g ID=Ciclev10013267m.v1.0 annot-version=v1.0	54.17	5	5	32	72	8.3323	9.17334	0.983669	1.14475	1.05543	1.06128	0.969976	1.00572	0.990219	0.988638	1.07348	0.202653
Ciclev10029126m	pacid=20813229 transcript=Ciclev10029126m locus=Ciclev10029126m.g ID=Ciclev10029126m.v1.0 annot-version=v1.0	12.75	3	3	9	251	27.3127	6.34131	1.01348	1.0435	1.01046	1.02248	1.00467	1.12815	1.1283	1.08704	0.94061	0.203479
Ciclev10005111m	pacid=20790051 transcript=Ciclev10005111m locus=Ciclev10005111m.g ID=Ciclev10005111m.v1.0 annot-version=v1.0	43.61	16	16	288	399	45.5888	9.18799	0.918569	1.07073	0.903259	0.964185	1.01647	1.06139	1.06951	1.04912	0.919038	0.203538
Ciclev10013984m	pacid=20799262 transcript=Ciclev10013984m locus=Ciclev10013984m.g ID=Ciclev10013984m.v1.0 annot-version=v1.0	2.83	1	1	5	247	27.1825	5.42725	1.12208	1.04679	0.964989	1.04462	1.11154	1.14291	1.0955	1.11665	0.935499	0.203646
Ciclev10022129m	pacid=20806463 transcript=Ciclev10022129m locus=Ciclev10022129m.g ID=Ciclev10022129m.v1.0 annot-version=v1.0	46.64	2	11	140	223	24.2014	5.84619	1.84737	1.94841	2.00599	1.93392	1.24507	1.87165	1.77422	1.63032	1.18623	0.203816
Ciclev10033058m	pacid=20804847 transcript=Ciclev10033058m locus=Ciclev10033058m.g ID=Ciclev10033058m.v1.0 annot-version=v1.0	46.21	4	4	26	132	14.9756	6.17627	1.03187	1.3602	0.869189	1.08709	0.929259	0.831753	0.825771	0.862261	1.26074	0.203982
Ciclev10014298m	pacid=20817984 transcript=Ciclev10014298m locus=Ciclev10014293m.g ID=Ciclev10014298m.v1.0 annot-version=v1.0	5.77	4	4	7	814	91.0146	6.29053	0.966791	0.894244	1.10537	0.988801	1.09998	1.07429	1.07601	1.08343	0.912659	0.204484
Ciclev10020723m	pacid=20806109 transcript=Ciclev10020723m locus=Ciclev10020723m.g ID=Ciclev10020723m.v1.0 annot-version=v1.0	56.95	10	16	299	367	41.4379	6.68311	1.08825	1.11809	1.14918	1.11851	1.11922	1.17351	1.18391	1.15888	0.965162	0.204735
Ciclev10031390m	pacid=20804347 transcript=Ciclev10031390m locus=Ciclev10031390m.g ID=Ciclev10031390m.v1.0 annot-version=v1.0	42.08	9	18	100	480	53.0692	7.12256	1.04375	1.16169	1.04715	1.0842	1.03137	1.04825	0.943843	1.00782	1.07578	0.204904
Ciclev10001692m	pacid=20789410 transcript=Ciclev10001692m locus=Ciclev10001692m.g ID=Ciclev10001692m.v1.0 annot-version=v1.0	17.82	6	6	12	348	38.9942	8.38232	1.2596	1.13083	1.1155	1.16864	1.01727	1.16365	1.02711	1.06934	1.09286	0.205326
Ciclev10010027m	pacid=20794292 transcript=Ciclev10010027m locus=Ciclev10010027m.g ID=Ciclev10010027m.v1.0 annot-version=v1.0	30.53	2	5	22	95	10.8818	11.8687	0.89561	1.13707	1.04713	1.0266	0.854428	0.801579	1.00325	0.88642	1.15814	0.205362
Ciclev10028242m	pacid=20813048 transcript=Ciclev10028242m locus=Ciclev10028242m.g ID=Ciclev10028242m.v1.0 annot-version=v1.0	5.16	3	3	10	504	55.9118	8.63135	1.21492		1.29657	1.25575	1.1175		1.19085	1.15418	1.088	0.205411
Ciclev10004550m	pacid=20790188 transcript=Ciclev10004550m locus=Ciclev10004550m.g ID=Ciclev10004550m.v1.0 annot-version=v1.0	2.72	1	2	5	626	70.7251	8.646	1.07556	1.0641		1.06983	1.02555	0.922656		0.974104	1.09827	0.205668
Ciclev10000466m	pacid=20787606 transcript=Ciclev10000466m locus=Ciclev10000466m.g ID=Ciclev10000466m.v1.0 annot-version=v1.0	11.78	5	6	18	696	75.8813	6.62451	0.954231	1.02057	1.29064	1.08848	0.943043	0.948745	0.903581	0.931789	1.16816	0.205856
Ciclev10025268m	pacid=20800162 transcript=Ciclev10025268m locus=Ciclev10025268m.g ID=Ciclev10025268m.v1.0 annot-version=v1.0	2.63	1	1	2	571	63.3121	6.22705		1.06913	0.946988	1.00806		1.1967	1.10341	1.15005	0.876531	0.205889
Ciclev10020344m	pacid=20810574 transcript=Ciclev10020344m locus=Ciclev10020055m.g ID=Ciclev10020344m.v1.0 annot-version=v1.0	10.07	4	4	18	417	44.9599	5.32568	1.02016	0.932732	1.01716	0.990017	1.22685	0.996567	1.0777	1.10037	0.89971	0.206508
Ciclev10001917m	pacid=20789435 transcript=Ciclev10001917m locus=Ciclev10001310m.g ID=Ciclev10001917m.v1.0 annot-version=v1.0	17.36	3	3	35	311	32.9293	5.19873	1.27376	0.969541	1.27058	1.17129	1.06379	0.985895	0.995569	1.01508	1.15389	0.206849
Ciclev10022161m	pacid=20811252 transcript=Ciclev10022161m locus=Ciclev10022161m.g ID=Ciclev10022161m.v1.0 annot-version=v1.0	15.53	3	3	6	219	24.1962	8.49951	1.11845	1.36456	1.27067	1.25123	1.0242	1.23388	1.06022	1.1061	1.1312	0.207443
Ciclev10028497m	pacid=20814239 transcript=Ciclev10028497m locus=Ciclev10028497m.g ID=Ciclev10028497m.v1.0 annot-version=v1.0	3.5	1	1	48	428	46.523	9.29053	1.14637	1.09956	1.203	1.14964	0.964058	1.0424	1.1567	1.05439	1.09034	0.207546
Ciclev10018335m	pacid=20818848 transcript=Ciclev10018335m locus=Ciclev10018335m.g ID=Ciclev10018335m.v1.0 annot-version=v1.0	5.14	4	4	12	662	73.6755	8.07471	1.173		1.20151	1.18726	1.12323	1.16189	1.03145	1.10553	1.07393	0.207719
Ciclev10014367m	pacid=20818597 transcript=Ciclev10014367m locus=Ciclev10014320m.g ID=Ciclev10014367m.v1.0 annot-version=v1.0	32.55	23	23	104	762	87.3023	5.71924	0.951762	0.95099	0.916502	0.939751	1.00618	0.973047	0.940342	0.973191	0.965639	0.207804
Ciclev10004377m	pacid=20790825 transcript=Ciclev10004377m locus=Ciclev10004325m.g ID=Ciclev10004377m.v1.0 annot-version=v1.0	8.56	6	6	28	771	83.7532	5.93506	1.12103	1.06051	0.991752	1.05776	1.22575	1.22131	1.04387	1.16364	0.909009	0.207999
Ciclev10007391m	pacid=20793224 transcript=Ciclev10007391m locus=Ciclev10007391m.g ID=Ciclev10007391m.v1.0 annot-version=v1.0	22.63	19	19	71	919	99.2749	6.41748	1.03755	0.983855	0.945231	0.988878	0.983194	0.908591	0.772944	0.888243	1.1133	0.208109
Ciclev10017274m	pacid=20817414 transcript=Ciclev10017274m locus=Ciclev10017274m.g ID=Ciclev10017274m.v1.0 annot-version=v1.0	14.56	1	1	28	103	10.6122	7.50342		0.813668	0.78678	0.800224		0.746796	0.778057	0.762427	1.04957	0.208202
Ciclev10011420m	pacid=20798573 transcript=Ciclev10011420m locus=Ciclev10011420m.g ID=Ciclev10011420m.v1.0 annot-version=v1.0	12.84	7	8	9	545	61.2207	6.80029	1.29923	1.14353		1.22138	1.01192	1.10212		1.05702	1.1555	0.20925
Ciclev10019404m	pacid=20809879 transcript=Ciclev10019404m locus=Ciclev10019404m.g ID=Ciclev10019404m.v1.0 annot-version=v1.0	8.57	4	4	8	595	66.585	8.89502	1.01139	1.10654	0.941138	1.01969	0.933961	0.979732	0.913211	0.942301	1.08213	0.209474
Ciclev10002854m	pacid=20785892 transcript=Ciclev10002854m locus=Ciclev10002854m.g ID=Ciclev10002854m.v1.0 annot-version=v1.0	61.29	8	8	31	124	13.5871	9.46631	0.935967	0.874015	0.965649	0.92521	1.00033	0.929352	1.01561	0.981762	0.942398	0.20974
Ciclev10000120m	pacid=20786751 transcript=Ciclev10000120m locus=Ciclev10000120m.g ID=Ciclev10000120m.v1.0 annot-version=v1.0	38.16	34	34	152	1043	115.262	6.03662	0.844118	0.927433	0.850839	0.87413	0.935852	0.966148	0.88248	0.92816	0.941789	0.210095
Ciclev10027785m	pacid=20812480 transcript=Ciclev10027785m locus=Ciclev10027778m.g ID=Ciclev10027785m.v1.0 annot-version=v1.0	6.96	6	6	45	891	99.4065	5.0083	1.03139	0.905031	0.93235	0.956258	1.08893	1.0305	0.975056	1.0315	0.92706	0.210805
Ciclev10014077m	pacid=20818456 transcript=Ciclev10014077m locus=Ciclev10014064m.g ID=Ciclev10014077m.v1.0 annot-version=v1.0	1.77	2	2	5	1189	128.64	4.52588	1.0313	1.279	1.05937	1.12322	1.00027	1.03806	0.971392	1.00324	1.11959	0.211062
Ciclev10022165m	pacid=20810490 transcript=Ciclev10022165m locus=Ciclev10022165m.g ID=Ciclev10022165m.v1.0 annot-version=v1.0	14.68	3	3	5	218	24.6775	9.24658	1.07592	0.913602	0.917805	0.969108	1.00047	1.17918	1.06161	1.08042	0.896974	0.211217
Ciclev10026233m	pacid=20800365 transcript=Ciclev10026233m locus=Ciclev10026233m.g ID=Ciclev10026233m.v1.0 annot-version=v1.0	23.57	5	5	15	280	30.7058	11.4585	0.92855	0.829414	0.913038	0.890334	0.973397	0.998926	0.894717	0.95568	0.931624	0.211235
Ciclev10007279m	pacid=20795251 transcript=Ciclev10007279m locus=Ciclev10007279m.g ID=Ciclev10007279m.v1.0 annot-version=v1.0	21.59	21	21	71	1186	127.955	5.56689	0.991038	0.975052	1.11965	1.02858	0.993159	0.757776	0.952136	0.901024	1.14157	0.211385
Ciclev10003758m	pacid=20786202 transcript=Ciclev10003758m locus=Ciclev10003758m.g ID=Ciclev10003758m.v1.0 annot-version=v1.0	53.49	23	37	508	744	80.2727	5.79541	1.06486	1.05423	1.02769	1.04893	1.03485	1.12574	1.14943	1.10334	0.950682	0.211562
Ciclev10026551m	pacid=20799485 transcript=Ciclev10026551m locus=Ciclev10026551m.g ID=Ciclev10026551m.v1.0 annot-version=v1.0	22.4	2	3	11	192	21.1271	9.43701	0.929728	1.05843	1.0229	1.00369	0.892155	0.912563	0.989948	0.931556	1.07743	0.211752
Ciclev10005482m	pacid=20789925 transcript=Ciclev10005482m locus=Ciclev10005482m.g ID=Ciclev10005482m.v1.0 annot-version=v1.0	28.94	10	10	28	311	34.8507	5.2876	1.09734	0.956494	1.08624	1.04669	1.09898	1.26826	1.09632	1.15452	0.906603	0.211943
Ciclev10012631m	pacid=20798866 transcript=Ciclev10012631m locus=Ciclev10012631m.g ID=Ciclev10012631m.v1.0 annot-version=v1.0	37.29	9	9	65	236	27.149	5.57959	1.13774	1.34047	1.25203	1.24342	0.99661	1.20158	1.15271	1.11697	1.11321	0.21207
Ciclev10021796m	pacid=20808806 transcript=Ciclev10021796m locus=Ciclev10021253m.g ID=Ciclev10021796m.v1.0 annot-version=v1.0	9.77	2	2	3	256	29.041	8.67529		1.70878	1.10944	1.40911		0.874927	0.859127	0.867027	1.62522	0.212285
Ciclev10007338m	pacid=20794039 transcript=Ciclev10007338m locus=Ciclev10007338m.g ID=Ciclev10007338m.v1.0 annot-version=v1.0	39.82	18	35	217	1002	109.58	7.29834	1.09457	0.924075	1.11646	1.04503	1.00622	0.922062	0.90172	0.943336	1.10781	0.212942
Ciclev10032320m	pacid=20804580 transcript=Ciclev10032320m locus=Ciclev10032213m.g ID=Ciclev10032320m.v1.0 annot-version=v1.0	60.35	10	15	60	285	31.324	5.32568	0.935523	0.941176	0.965694	0.947464	0.942378	0.99586	1.05823	0.998823	0.94858	0.213315
Ciclev10028614m	pacid=20812798 transcript=Ciclev10028614m locus=Ciclev10028614m.g ID=Ciclev10028614m.v1.0 annot-version=v1.0	33.16	4	12	260	392	42.8747	6.0874	1.05636	0.968637	1.11441	1.04647	0.987047	0.935374	1.00673	0.976384	1.07178	0.213444
Ciclev10025758m	pacid=20800526 transcript=Ciclev10025758m locus=Ciclev10025758m.g ID=Ciclev10025758m.v1.0 annot-version=v1.0	11.11	4	4	7	405	45.6225	7.41553	1.01831	0.862212	0.99692	0.959147	0.927211	0.850237	0.857572	0.87834	1.092	0.213455
Ciclev10018889m	pacid=20807142 transcript=Ciclev10018889m locus=Ciclev10018889m.g ID=Ciclev10018889m.v1.0 annot-version=v1.0	20.84	9	15	64	811	92.5633	6.43018	0.987957	1.09833	1.02263	1.03631	1.03437	1.45965	1.18535	1.22646	0.844958	0.213525
Ciclev10005479m	pacid=20792430 transcript=Ciclev10005479m locus=Ciclev10005479m.g ID=Ciclev10005479m.v1.0 annot-version=v1.0	20.51	5	5	15	312	34.0591	6.68311	1.05495	1.0797	0.878008	1.00422	1.10775	1.15424	1.05798	1.10666	0.907435	0.213559
Ciclev10020877m	pacid=20806089 transcript=Ciclev10020877m locus=Ciclev10020877m.g ID=Ciclev10020877m.v1.0 annot-version=v1.0	6.82	3	3	12	352	39.6656	6.78564	0.996162	1.11371		1.05494	0.961896	1.01294	0.955877	0.976905	1.07988	0.214085
Ciclev10014450m	pacid=20817658 transcript=Ciclev10014450m locus=Ciclev10014450m.g ID=Ciclev10014450m.v1.0 annot-version=v1.0	1	1	1	2	703	75.689	6.18896	1.0322	1.14587		1.08904	0.913482	1.00389		0.958685	1.13597	0.214494
Ciclev10013333m	pacid=20796948 transcript=Ciclev10013333m locus=Ciclev10013333m.g ID=Ciclev10013333m.v1.0 annot-version=v1.0	6.41	3	3	5	515	58.3065	9.18799	1.20459	1.01326	1.02697	1.08161	1.24301	1.28176	1.0929	1.20589	0.896937	0.214604
Ciclev10007643m	pacid=20795031 transcript=Ciclev10007643m locus=Ciclev10007643m.g ID=Ciclev10007643m.v1.0 annot-version=v1.0	2.91	2	2	4	687	77.0135	8.17725		1.08972	1.00977	1.04975		0.982734	0.972155	0.977444	1.07397	0.214831
Ciclev10029104m	pacid=20813269 transcript=Ciclev10029104m locus=Ciclev10029104m.g ID=Ciclev10029104m.v1.0 annot-version=v1.0	8.98	2	3	6	256	29.7741	9.12939	1.15781	1.0324	1.0692	1.08647	1.11715	0.875577	0.873742	0.955489	1.13708	0.215034
Ciclev10004820m	pacid=20790292 transcript=Ciclev10004820m locus=Ciclev10004820m.g ID=Ciclev10004820m.v1.0 annot-version=v1.0	3.61	1	2	12	498	55.8717	8.32373	0.781504	0.840459	0.96642	0.862794	0.75215	0.680757	0.840238	0.757715	1.13868	0.215204
Ciclev10011549m	pacid=20796288 transcript=Ciclev10011549m locus=Ciclev10011549m.g ID=Ciclev10011549m.v1.0 annot-version=v1.0	1.21	1	1	2	497	53.5238	5.57959		1.09942	1.01947	1.05945		1.12983	1.13226	1.13105	0.936695	0.215278
Ciclev10004675m	pacid=20790496 transcript=Ciclev10004675m locus=Ciclev10004648m.g ID=Ciclev10004675m.v1.0 annot-version=v1.0	48.55	21	22	154	552	60.5204	4.62744	1.01143	0.958883	0.996822	0.989044	1.0371	0.987319	1.05782	1.02742	0.962653	0.215927
Ciclev10012944m	pacid=20797621 transcript=Ciclev10012944m locus=Ciclev10012944m.g ID=Ciclev10012944m.v1.0 annot-version=v1.0	46.99	7	7	29	166	17.7263	5.56689	1.06288	1.18641	1.19563	1.14831	1.01029	1.01196	1.14774	1.05666	1.08673	0.216393
Ciclev10030570m	pacid=20804771 transcript=Ciclev10030570m locus=Ciclev10030570m.g ID=Ciclev10030570m.v1.0 annot-version=v1.0	25.87	25	25	179	1094	118.259	5.36377	1.0521	0.92136	0.949085	0.97418	1.03791	1.01371	1.05284	1.03482	0.941401	0.216611
Ciclev10014066m	pacid=20815248 transcript=Ciclev10014066m locus=Ciclev10014066m.g ID=Ciclev10014066m.v1.0 annot-version=v1.0	12.21	10	12	21	1237	141.956	7.66455		0.911883	0.8985	0.905191		0.960352	0.922158	0.941255	0.961685	0.216662
Ciclev10016015m	pacid=20815303 transcript=Ciclev10016015m locus=Ciclev10016011m.g ID=Ciclev10016015m.v1.0 annot-version=v1.0	6.11	2	2	2	311	34.5065	8.23584	1.11417		1.27473	1.19445	1.07311		0.916989	0.995048	1.20039	0.216907
Ciclev10018996m	pacid=20809029 transcript=Ciclev10018996m locus=Ciclev10018996m.g ID=Ciclev10018996m.v1.0 annot-version=v1.0	1.74	1	1	4	746	84.5478	6.3667	1.18182		1.0917	1.13676	1.06427		0.948246	1.00626	1.12969	0.217615
Ciclev10032237m	pacid=20802340 transcript=Ciclev10032237m locus=Ciclev10032237m.g ID=Ciclev10032237m.v1.0 annot-version=v1.0	10.26	2	2	6	302	35.441	5.94775	0.958156	0.836323	0.926675	0.907051	0.959096	0.934337	1.04488	0.979438	0.926093	0.217825
Ciclev10005029m	pacid=20791411 transcript=Ciclev10005029m locus=Ciclev10005029m.g ID=Ciclev10005029m.v1.0 annot-version=v1.0	55.76	15	18	301	425	44.9849	8.67529	0.934672	0.907726	0.962564	0.934987	1.00075	0.946466	0.9579	0.968372	0.965525	0.218333
Ciclev10020871m	pacid=20810689 transcript=Ciclev10020871m locus=Ciclev10020871m.g ID=Ciclev10020871m.v1.0 annot-version=v1.0	57.1	18	18	234	352	38.9693	5.17334	0.96802	1.15938	1.11196	1.07979	0.917273	1.02588	1.00529	0.982813	1.09867	0.218402
Ciclev10028191m	pacid=20812725 transcript=Ciclev10028191m locus=Ciclev10028191m.g ID=Ciclev10028191m.v1.0 annot-version=v1.0	32.26	15	15	67	527	59.284	6.48096	1.00385	0.965321	0.932782	0.967316	0.994207	0.984535	1.05359	1.01078	0.957001	0.218437
Ciclev10019317m	pacid=20808783 transcript=Ciclev10019317m locus=Ciclev10019317m.g ID=Ciclev10019317m.v1.0 annot-version=v1.0	9.31	5	5	9	623	69.3215	7.54736	0.883957	1.12285	0.824308	0.943704	1.03491	1.32243	1.04639	1.13457	0.83177	0.218748
Ciclev10000469m	pacid=20788371 transcript=Ciclev10000469m locus=Ciclev10000469m.g ID=Ciclev10000469m.v1.0 annot-version=v1.0	14.84	8	9	20	694	76.6744	5.22412	0.912402	1.09875	0.901001	0.970719	1.05552	1.10335	1.04417	1.06768	0.909183	0.219225
Ciclev10027750m	pacid=20813378 transcript=Ciclev10027750m locus=Ciclev10027750m.g ID=Ciclev10027750m.v1.0 annot-version=v1.0	16.92	5	14	32	975	108.509	9.64209	1.30021		1.02805	1.16413	0.758614		0.965552	0.862083	1.35037	0.219285
Ciclev10028764m	pacid=20813310 transcript=Ciclev10028764m locus=Ciclev10028764m.g ID=Ciclev10028764m.v1.0 annot-version=v1.0	2.33	1	1	2	343	39.7015	8.85107		1.13543	0.959452	1.04744		0.766013	0.918174	0.842093	1.24385	0.219543
Ciclev10017174m	pacid=20818479 transcript=Ciclev10017174m locus=Ciclev10017174m.g ID=Ciclev10017174m.v1.0 annot-version=v1.0	15.75	3	3	10	127	14.1111	4.81787	1.04728	1.1423	1.33699	1.17552	1.11377	1.03079	0.965746	1.03677	1.13383	0.219588
Ciclev10008911m	pacid=20794953 transcript=Ciclev10008911m locus=Ciclev10008911m.g ID=Ciclev10008911m.v1.0 annot-version=v1.0	23.31	8	8	52	326	37.0352	9.29053	1.2044	1.32482	1.22327	1.25083	1.23096	1.18712	1.10968	1.17592	1.0637	0.219702
Ciclev10014970m	pacid=20818586 transcript=Ciclev10014970m locus=Ciclev10014970m.g ID=Ciclev10014970m.v1.0 annot-version=v1.0	12.01	5	6	23	508	57.2188	8.01611	0.870269	1.06561	1.00889	0.981591	0.829089	0.954631	0.858976	0.880899	1.11431	0.219777
Ciclev10007374m	pacid=20794308 transcript=Ciclev10007374m locus=Ciclev10007374m.g ID=Ciclev10007374m.v1.0 annot-version=v1.0	11.49	1	9	54	949	104.364	6.48096	0.900486	0.816952		0.858719	0.920536	0.959425		0.93998	0.91355	0.219813
Ciclev10023723m	pacid=20807708 transcript=Ciclev10023723m locus=Ciclev10023723m.g ID=Ciclev10023723m.v1.0 annot-version=v1.0	18.56	10	12	36	582	64.0627	8.99756	1.27158	1.2489	1.05587	1.19212	1.01745	1.10322	1.12502	1.0819	1.10187	0.220133
Ciclev10028531m	pacid=20813094 transcript=Ciclev10028531m locus=Ciclev10028531m.g ID=Ciclev10028531m.v1.0 annot-version=v1.0	37.74	6	17	191	416	46.1268	6.48096	0.812101	0.878865	0.950506	0.880491	0.884259	0.982377	1.02882	0.96515	0.912283	0.220864
Ciclev10007296m	pacid=20795805 transcript=Ciclev10007296m locus=Ciclev10007296m.g ID=Ciclev10007296m.v1.0 annot-version=v1.0	8.48	8	9	18	1085	122.208	6.78564	0.802156	1.03649	0.883024	0.907222	1.01246	1.0194	0.990783	1.00755	0.900427	0.221031
Ciclev10019394m	pacid=20808709 transcript=Ciclev10019394m locus=Ciclev10019394m.g ID=Ciclev10019394m.v1.0 annot-version=v1.0	26.38	8	13	55	599	65.3819	9.90576	1.09564	0.931306	0.920678	0.98254	1.01059	1.11692	1.10676	1.07809	0.911373	0.221213
Ciclev10032155m	pacid=20802568 transcript=Ciclev10032155m locus=Ciclev10032134m.g ID=Ciclev10032155m.v1.0 annot-version=v1.0	40.51	10	10	67	316	34.9589	5.59229	0.973831	1.08973	1.08321	1.04892	1.08202	1.09659	1.23169	1.13677	0.922725	0.221351
Ciclev10015201m	pacid=20818424 transcript=Ciclev10015201m locus=Ciclev10015030m.g ID=Ciclev10015201m.v1.0 annot-version=v1.0	15.6	6	7	16	455	52.2388	5.73193	1.00728	1.00353	0.855902	0.955569	1.0712	0.998664	1.03142	1.03376	0.924362	0.221732
Ciclev10012277m	pacid=20799261 transcript=Ciclev10012277m locus=Ciclev10012277m.g ID=Ciclev10012277m.v1.0 annot-version=v1.0	35.16	8	9	24	310	33.4444	8.88037	1.20574	1.07205	0.987797	1.08853	0.960876	1.02452	0.994017	0.993137	1.09605	0.222228
Ciclev10008186m	pacid=20794912 transcript=Ciclev10008186m locus=Ciclev10008023m.g ID=Ciclev10008186m.v1.0 annot-version=v1.0	19.75	7	7	34	471	50.8222	6.80029	0.983882	0.817717	1.00441	0.935334	0.953875	1.06336	1.12228	1.0465	0.893772	0.222266
Ciclev10017460m	pacid=20815137 transcript=Ciclev10017460m locus=Ciclev10017460m.g ID=Ciclev10017460m.v1.0 annot-version=v1.0	26.4	8	8	29	322	35.0373	9.0708	0.960521	1.00694	0.884381	0.950614	0.986786	0.988925	1.07625	1.01732	0.934428	0.223196
Ciclev10004294m	pacid=20791527 transcript=Ciclev10004294m locus=Ciclev10004294m.g ID=Ciclev10004294m.v1.0 annot-version=v1.0	18.42	15	15	51	863	95.8802	6.37939	0.966476	1.06952	0.917926	0.984642	0.9621	0.813251	0.909297	0.894883	1.1003	0.223801
Ciclev10014110m	pacid=20817663 transcript=Ciclev10014110m locus=Ciclev10014110m.g ID=Ciclev10014110m.v1.0 annot-version=v1.0	10.26	10	10	23	1062	118.53	6.07471	0.828906	0.974726	0.894199	0.899277	1.01317	0.923556	0.974613	0.970446	0.926664	0.224013
Ciclev10018561m	pacid=20806843 transcript=Ciclev10018561m locus=Ciclev10018561m.g ID=Ciclev10018561m.v1.0 annot-version=v1.0	34.22	33	33	134	1201	131.173	6.59521	0.93601	0.885206	0.947828	0.923015	1.00991	0.94271	0.943313	0.965311	0.956184	0.224071
Ciclev10025170m	pacid=20799510 transcript=Ciclev10025170m locus=Ciclev10025170m.g ID=Ciclev10025170m.v1.0 annot-version=v1.0	16.91	10	11	52	621	67.738	9.42236	1.16744	0.975336	0.975963	1.03958	1.13514	1.23398	1.08412	1.15108	0.903133	0.22413
Ciclev10014144m	pacid=20816895 transcript=Ciclev10014144m locus=Ciclev10014144m.g ID=Ciclev10014144m.v1.0 annot-version=v1.0	8.98	8	8	16	991	110.981	9.23193	1.01922	0.936956	0.976077	0.977418	0.969382	0.823846	0.926844	0.90669	1.07801	0.224749
Ciclev10010759m	pacid=20795619 transcript=Ciclev10010759m locus=Ciclev10010759m.g ID=Ciclev10010759m.v1.0 annot-version=v1.0	11.21	1	1	4	107	11.9303	9.40771		1.00662	0.967609	0.987112		1.16355	1.03821	1.10088	0.89666	0.225186
Ciclev10006456m	pacid=20791267 transcript=Ciclev10006456m locus=Ciclev10006456m.g ID=Ciclev10006456m.v1.0 annot-version=v1.0	2.86	3	3	4	1118	123.327	8.646		0.943796	0.776735	0.860266		0.737259	0.555673	0.646466	1.33072	0.225239
Ciclev10021743m	pacid=20810941 transcript=Ciclev10021743m locus=Ciclev10020946m.g ID=Ciclev10021743m.v1.0 annot-version=v1.0	27.48	4	4	11	262	29.1888	6.34131	1.20591	1.22158	1.57567	1.33438	1.28105	1.02761	1.07844	1.12903	1.18188	0.225443
Ciclev10004604m	pacid=20791170 transcript=Ciclev10004604m locus=Ciclev10004604m.g ID=Ciclev10004604m.v1.0 annot-version=v1.0	9.34	5	5	10	589	68.4836	6.354	1.06107	0.98331	1.17891	1.07443	0.965334	0.970576	1.02825	0.988053	1.08742	0.225449
Ciclev10030928m	pacid=20803791 transcript=Ciclev10030928m locus=Ciclev10030928m.g ID=Ciclev10030928m.v1.0 annot-version=v1.0	68.52	6	44	1320	648	70.947	5.21143	1.0022	0.965933	1.01231	0.993478	1.00831	1.03779	1.00813	1.01808	0.975839	0.225594
Ciclev10004588m	pacid=20791286 transcript=Ciclev10004588m locus=Ciclev10004588m.g ID=Ciclev10004588m.v1.0 annot-version=v1.0	45	22	22	149	600	67.0995	9.11475	0.855138	0.992786	0.911041	0.919655	1.0128	0.929922	1.03758	0.993434	0.925733	0.225594
Ciclev10031359m	pacid=20805011 transcript=Ciclev10031359m locus=Ciclev10031363m.g ID=Ciclev10031359m.v1.0 annot-version=v1.0	9.67	4	4	12	486	52.7011	6.15088	0.953301	1.01101	0.941453	0.968587	0.971945	1.05214	1.01749	1.01386	0.955347	0.225668
Ciclev10014991m	pacid=20818776 transcript=Ciclev10014991m locus=Ciclev10014991m.g ID=Ciclev10014991m.v1.0 annot-version=v1.0	26.05	11	11	66	499	55.7244	6.354	1.29851	1.35975	1.38998	1.34941	1.30054	1.58533	1.58664	1.49084	0.905137	0.225868
Ciclev10022157m	pacid=20807092 transcript=Ciclev10022157m locus=Ciclev10022157m.g ID=Ciclev10022157m.v1.0 annot-version=v1.0	37.44	6	7	35	219	24.2185	9.74463	0.940447	1.02143	0.949753	0.970544	0.957593	0.803796	0.922659	0.894683	1.08479	0.226424
Ciclev10014248m	pacid=20817115 transcript=Ciclev10014248m locus=Ciclev10014248m.g ID=Ciclev10014248m.v1.0 annot-version=v1.0	15.42	9	9	34	856	96.1644	6.37939	0.942462	0.97526	0.975709	0.964477	0.850001	0.93006	0.962607	0.914223	1.05497	0.226801
Ciclev10001075m	pacid=20785683 transcript=Ciclev10001075m locus=Ciclev10001075m.g ID=Ciclev10001075m.v1.0 annot-version=v1.0	11.42	5	5	10	464	52.3039	9.11475	0.984047	0.938544	0.949975	0.957522	0.953269	0.864955	0.927885	0.91537	1.04605	0.227477
Ciclev10005522m	pacid=20790139 transcript=Ciclev10005522m locus=Ciclev10005522m.g ID=Ciclev10005522m.v1.0 annot-version=v1.0	25.33	6	7	28	300	31.7259	8.89502	1.19621	1.15071	1.41541	1.25411	1.30156	1.37776	1.57514	1.41815	0.884328	0.228298
Ciclev10009918m	pacid=20793773 transcript=Ciclev10009918m locus=Ciclev10009918m.g ID=Ciclev10009918m.v1.0 annot-version=v1.0	20.49	1	3	22	122	14.1173	8.79248	1.26685		1.0752	1.17102	0.964774		1.03002	0.997396	1.17408	0.22844
Ciclev10000690m	pacid=20788469 transcript=Ciclev10000690m locus=Ciclev10000690m.g ID=Ciclev10000690m.v1.0 annot-version=v1.0	7.41	3	3	12	580	64.9877	8.44092	1.06527	1.14552	0.926986	1.04593	0.812088	0.98519	0.977449	0.924909	1.13084	0.228564
Ciclev10020020m	pacid=20810134 transcript=Ciclev10020020m locus=Ciclev10020020m.g ID=Ciclev10020020m.v1.0 annot-version=v1.0	23.67	10	11	55	469	50.4499	5.63037	0.958339	0.989944	1.02159	0.989959	0.987478	1.05413	1.04718	1.0296	0.961502	0.22906
Ciclev10022255m	pacid=20806987 transcript=Ciclev10022255m locus=Ciclev10022255m.g ID=Ciclev10022255m.v1.0 annot-version=v1.0	34.93	2	7	78	209	24.3255	11.5024	1.13342	0.961379		1.0474	0.928305	0.813496		0.8709	1.20266	0.229999
Ciclev10022141m	pacid=20806115 transcript=Ciclev10022141m locus=Ciclev10021674m.g ID=Ciclev10022141m.v1.0 annot-version=v1.0	26.24	4	4	28	221	24.5667	7.53271	1.01848		1.01049	1.01449	1.07543		1.03084	1.05313	0.963303	0.23004
Ciclev10011823m	pacid=20798819 transcript=Ciclev10011823m locus=Ciclev10012249m.g ID=Ciclev10011823m.v1.0 annot-version=v1.0	18.76	9	9	22	421	49.47	8.26514	1.12403	1.07241	0.967956	1.0548	0.943431	0.999761	1.00813	0.983774	1.07219	0.230049
Ciclev10018459m	pacid=20809214 transcript=Ciclev10018459m locus=Ciclev10018459m.g ID=Ciclev10018459m.v1.0 annot-version=v1.0	0.43	1	1	2	1849	211.406	5.12256	1.32568	1.31333		1.3195	1.37821	1.54343		1.46082	0.903264	0.230155
Ciclev10018428m	pacid=20808672 transcript=Ciclev10018428m locus=Ciclev10018428m.g ID=Ciclev10018428m.v1.0 annot-version=v1.0	26.29	59	59	183	2628	286.315	7.50342	0.977317	0.982899	0.951496	0.970571	0.981527	1.0316	0.980839	0.99799	0.972526	0.230281
Ciclev10030695m	pacid=20804887 transcript=Ciclev10030695m locus=Ciclev10030695m.g ID=Ciclev10030695m.v1.0 annot-version=v1.0	4.71	4	4	8	850	97.4626	7.26904	1.00604	0.950652	0.893509	0.950068	0.942206	1.05681	1.07424	1.02442	0.927421	0.230647
Ciclev10014159m	pacid=20815384 transcript=Ciclev10014159m locus=Ciclev10014159m.g ID=Ciclev10014159m.v1.0 annot-version=v1.0	14.9	13	13	31	973	105.86	6.34131	1.06151	1.07182	0.982531	1.03862	1.0189	0.98622	0.981291	0.995469	1.04335	0.230939
Ciclev10009558m	pacid=20796042 transcript=Ciclev10009558m locus=Ciclev10009464m.g ID=Ciclev10009558m.v1.0 annot-version=v1.0	41.62	8	8	49	197	21.251	9.34912	1.10725	1.07668	1.21846	1.13413	1.04835	0.99109	1.12096	1.05347	1.07657	0.231064
Ciclev10014380m	pacid=20818302 transcript=Ciclev10014380m locus=Ciclev10014380m.g ID=Ciclev10014380m.v1.0 annot-version=v1.0	33.64	21	21	82	758	85.6021	5.75732	0.999628	1.0534	1.02227	1.0251	0.99399	1.00677	1.0063	1.00235	1.02269	0.231486
Ciclev10018753m	pacid=20807060 transcript=Ciclev10018753m locus=Ciclev10018753m.g ID=Ciclev10018753m.v1.0 annot-version=v1.0	12.89	8	8	14	923	103.093	5.46533	0.990952		0.91426	0.952606	0.823323	0.944706	0.822026	0.863352	1.10338	0.232323
Ciclev10002191m	pacid=20786240 transcript=Ciclev10002191m locus=Ciclev10002193m.g ID=Ciclev10002191m.v1.0 annot-version=v1.0	20.91	2	5	18	263	29.0932	6.44287	1.2532	1.28137	0.957576	1.16405	0.95489	1.05178	1.03128	1.01265	1.1495	0.232416
Ciclev10025417m	pacid=20801186 transcript=Ciclev10025417m locus=Ciclev10025417m.g ID=Ciclev10025417m.v1.0 annot-version=v1.0	4.74	1	2	6	506	58.6119	8.85107	1.14109	1.5698	1.91755	1.54281	1.01528	1.33872	1.24529	1.19976	1.28593	0.232861
Ciclev10012447m	pacid=20797711 transcript=Ciclev10012447m locus=Ciclev10012447m.g ID=Ciclev10012447m.v1.0 annot-version=v1.0	38.83	8	8	69	273	30.8917	5.09717	0.860181	0.904383	1.04738	0.937314	1.00125	0.994511	1.08175	1.02584	0.913708	0.233065
Ciclev10009711m	pacid=20793476 transcript=Ciclev10009711m locus=Ciclev10009711m.g ID=Ciclev10009711m.v1.0 annot-version=v1.0	12.43	2	2	4	169	19.1805	4.70361		1.00057	1.09385	1.04721		1.12041	1.13306	1.12674	0.929416	0.233145
Ciclev10005808m	pacid=20792104 transcript=Ciclev10005808m locus=Ciclev10005808m.g ID=Ciclev10005808m.v1.0 annot-version=v1.0	26.87	7	7	14	227	26.4499	5.5415	1.28944	1.33504	1.27392	1.29947	1.31983	1.31533	1.37657	1.33725	0.97175	0.233211
Ciclev10033062m	pacid=20803133 transcript=Ciclev10033062m locus=Ciclev10033065m.g ID=Ciclev10033062m.v1.0 annot-version=v1.0	61.54	8	8	225	130	14.7649	9.89111	0.952807	0.915599	1.04109	0.969832	1.02773	1.04496	1.00199	1.02489	0.946275	0.233324
Ciclev10004603m	pacid=20790548 transcript=Ciclev10004603m locus=Ciclev10004603m.g ID=Ciclev10004603m.v1.0 annot-version=v1.0	25.04	14	14	48	591	67.0721	8.71924	1.01449	0.978715	1.05573	1.01631	0.971529	0.86485	1.00861	0.94833	1.07169	0.233608
Ciclev10017332m	pacid=20818172 transcript=Ciclev10017332m locus=Ciclev10017332m.g ID=Ciclev10017332m.v1.0 annot-version=v1.0	44.19	3	3	56	86	9.59381	8.73389	0.962837	0.967939	0.912093	0.947623	0.951387	1.0217	0.983347	0.985477	0.961588	0.234042
Ciclev10005918m	pacid=20791870 transcript=Ciclev10005918m locus=Ciclev10005918m.g ID=Ciclev10005918m.v1.0 annot-version=v1.0	23.76	5	5	33	202	22.4332	7.35693	1.03528	0.955715	0.970284	0.987093	1.0745	1.02931	0.996964	1.03359	0.955013	0.234209
Ciclev10016731m	pacid=20815481 transcript=Ciclev10016731m locus=Ciclev10016681m.g ID=Ciclev10016731m.v1.0 annot-version=v1.0	10.73	2	2	5	205	23.1309	8.70459		0.971062	0.925904	0.948483		0.900133	0.916164	0.908149	1.04441	0.234321
Ciclev10018810m	pacid=20808736 transcript=Ciclev10018810m locus=Ciclev10018812m.g ID=Ciclev10018810m.v1.0 annot-version=v1.0	14.53	11	11	21	874	95.4287	7.00537	0.984597	1.03995	0.929324	0.984623	1.03976	1.04343	1.01126	1.03148	0.954571	0.234605
Ciclev10023246m	pacid=20810053 transcript=Ciclev10023246m locus=Ciclev10023246m.g ID=Ciclev10023246m.v1.0 annot-version=v1.0	29.69	3	3	15	64	7.44187	9.93506	0.920902	0.805157	0.761724	0.829261	0.920488	0.935364	0.855849	0.903901	0.917425	0.234784
Ciclev10021564m	pacid=20807397 transcript=Ciclev10021564m locus=Ciclev10021564m.g ID=Ciclev10021564m.v1.0 annot-version=v1.0	16.73	4	4	11	281	29.9117	7.78174	1.03976	0.888106	0.989411	0.972426	1.08815	0.967519	1.22368	1.09311	0.889592	0.234923
Ciclev10023071m	pacid=20808390 transcript=Ciclev10023071m locus=Ciclev10023071m.g ID=Ciclev10023071m.v1.0 annot-version=v1.0	42.86	5	5	6	91	9.83199	9.0708	0.96706	1.13099	1.01953	1.03919	0.96979	0.989548	0.950249	0.969862	1.07149	0.235076
Ciclev10015933m	pacid=20815510 transcript=Ciclev10015933m locus=Ciclev10015933m.g ID=Ciclev10015933m.v1.0 annot-version=v1.0	35.29	10	10	53	323	35.8325	5.73193	0.838072	0.920196	1.09495	0.951073	1.00985	1.10886	1.07399	1.06423	0.893673	0.235437
Ciclev10022609m	pacid=20809651 transcript=Ciclev10022609m locus=Ciclev10021825m.g ID=Ciclev10022609m.v1.0 annot-version=v1.0	24.22	3	3	7	161	18.2474	4.88135	1.02562	1.10436		1.06499	0.996791	1.00093		0.998861	1.0662	0.23548
Ciclev10025224m	pacid=20802085 transcript=Ciclev10025224m locus=Ciclev10025224m.g ID=Ciclev10025224m.v1.0 annot-version=v1.0	26.01	13	13	67	592	67.9842	6.15088	0.933978	0.940147	1.01555	0.963226	0.979535	1.00051	1.04942	1.00982	0.953858	0.235618
Ciclev10018663m	pacid=20810826 transcript=Ciclev10018663m locus=Ciclev10018663m.g ID=Ciclev10018663m.v1.0 annot-version=v1.0	6.78	5	5	10	1018	108.663	7.00537	0.86811	0.988649	1.11432	0.990359	1.03402	1.10292	1.17959	1.10551	0.895838	0.235662
Ciclev10015917m	pacid=20815866 transcript=Ciclev10015917m locus=Ciclev10015917m.g ID=Ciclev10015917m.v1.0 annot-version=v1.0	57.06	15	16	155	326	35.7712	6.91748	0.978503	0.861495	0.901951	0.913983	0.95762	0.963434	0.964702	0.961919	0.950166	0.235666
Ciclev10013029m	pacid=20797098 transcript=Ciclev10013029m locus=Ciclev10013029m.g ID=Ciclev10013029m.v1.0 annot-version=v1.0	65.1	12	12	205	149	16.8369	4.27197	1.18336	1.21944	1.37188	1.25823	1.02858	1.25298	1.12998	1.13718	1.10645	0.23594
Ciclev10025155m	pacid=20802208 transcript=Ciclev10025155m locus=Ciclev10025155m.g ID=Ciclev10025155m.v1.0 annot-version=v1.0	4.76	3	3	4	630	71.435	4.95752		1.29295	1.22375	1.25835		0.828563	1.14532	0.986943	1.275	0.236081
Ciclev10007782m	pacid=20795822 transcript=Ciclev10007782m locus=Ciclev10007782m.g ID=Ciclev10007782m.v1.0 annot-version=v1.0	23.32	10	11	32	609	66.1056	7.06396	1.06702	1.19017	1.04363	1.10028	1.04556	1.06599	0.931515	1.01435	1.08471	0.236645
Ciclev10007240m	pacid=20795385 transcript=Ciclev10007240m locus=Ciclev10007239m.g ID=Ciclev10007240m.v1.0 annot-version=v1.0	4.6	5	6	8	1652	184.168	7.69385	1.25946	1.05046		1.15496	0.982756	0.977902		0.980329	1.17813	0.236734
Ciclev10028402m	pacid=20813739 transcript=Ciclev10028402m locus=Ciclev10028402m.g ID=Ciclev10028402m.v1.0 annot-version=v1.0	36.9	11	11	37	458	49.4893	5.37646	0.799517	0.910399	0.961815	0.890577	0.823651	0.853269	0.771773	0.816231	1.09108	0.236866
Ciclev10016127m	pacid=20818296 transcript=Ciclev10016127m locus=Ciclev10016127m.g ID=Ciclev10016127m.v1.0 annot-version=v1.0	44.86	10	10	68	292	32.3122	5.26221	0.964409	1.05097	1.08566	1.03368	1.07843	1.14106	1.06213	1.09387	0.944973	0.237252
Ciclev10000124m	pacid=20788935 transcript=Ciclev10000124m locus=Ciclev10000086m.g ID=Ciclev10000124m.v1.0 annot-version=v1.0	5.51	4	4	8	1034	116.698	8.03076	1.01478	0.734529	0.829708	0.859672	0.948311	1.29745	0.934874	1.06021	0.81085	0.237259
Ciclev10027174m	pacid=20801396 transcript=Ciclev10027174m locus=Ciclev10027174m.g ID=Ciclev10027174m.v1.0 annot-version=v1.0	39.5	32	32	283	929	104.99	5.14795	0.946285	1.00123	0.936238	0.96125	0.996972	1.01758	0.970576	0.995043	0.966039	0.237518
Ciclev10030506m	pacid=20803645 transcript=Ciclev10030506m locus=Ciclev10030505m.g ID=Ciclev10030506m.v1.0 annot-version=v1.0	5.29	6	7	11	1455	163.687	7.28369	1.11829	0.972976	0.848941	0.98007	1.11533	1.09244	1.06245	1.09007	0.899086	0.237809
Ciclev10004565m	pacid=20791136 transcript=Ciclev10004565m locus=Ciclev10004565m.g ID=Ciclev10004565m.v1.0 annot-version=v1.0	26.26	15	15	126	613	65.6802	7.10791	0.971981	0.979802	0.985615	0.979133	0.961655	1.06296	1.04212	1.02224	0.957827	0.238415
Ciclev10019976m	pacid=20806411 transcript=Ciclev10019976m locus=Ciclev10019957m.g ID=Ciclev10019976m.v1.0 annot-version=v1.0	15.55	6	6	28	476	52.5572	9.0708	1.25439	0.980268	1.03257	1.08908	0.903765	0.986996	1.00477	0.965177	1.12837	0.238937
Ciclev10007287m	pacid=20793330 transcript=Ciclev10007287m locus=Ciclev10007287m.g ID=Ciclev10007287m.v1.0 annot-version=v1.0	19.22	13	23	89	1134	124.654	6.96143	0.866898	0.986491	0.938994	0.930794	0.90856	1.10334	1.06736	1.02642	0.906836	0.239198
Ciclev10032423m	pacid=20805141 transcript=Ciclev10032423m locus=Ciclev10032423m.g ID=Ciclev10032423m.v1.0 annot-version=v1.0	13.06	2	2	20	268	29.6981	7.50342	1.04214	1.07214	1.10568	1.07332	1.27767	1.10789	1.09188	1.15914	0.925957	0.239805
Ciclev10002151m	pacid=20787729 transcript=Ciclev10002151m locus=Ciclev10002151m.g ID=Ciclev10002151m.v1.0 annot-version=v1.0	15.5	3	3	19	271	30.7581	7.91357	0.964016		0.999399	0.981707	1.12147		1.01983	1.07065	0.916928	0.240161
Ciclev10004818m	pacid=20790616 transcript=Ciclev10004818m locus=Ciclev10004819m.g ID=Ciclev10004818m.v1.0 annot-version=v1.0	46.39	18	18	183	498	53.7558	6.46826	0.990084	1.03117	0.953076	0.991443	0.997728	1.04134	1.05006	1.02971	0.96284	0.240181
Ciclev10011471m	pacid=20796802 transcript=Ciclev10011471m locus=Ciclev10011471m.g ID=Ciclev10011471m.v1.0 annot-version=v1.0	10.82	4	5	9	527	59.4323	6.29053		1.34807	1.0346	1.19133		0.683492	0.982878	0.833185	1.42985	0.240248
Ciclev10025334m	pacid=20800065 transcript=Ciclev10025334m locus=Ciclev10025334m.g ID=Ciclev10025334m.v1.0 annot-version=v1.0	39.59	18	19	148	533	58.4996	6.88818	0.949375	0.980392	0.970913	0.966893	0.90935	0.9623	0.952022	0.941224	1.02727	0.240266
Ciclev10013867m	pacid=20797243 transcript=Ciclev10013867m locus=Ciclev10013867m.g ID=Ciclev10013867m.v1.0 annot-version=v1.0	15.76	23	24	54	1935	216.134	8.70459	0.99563	0.903382	1.0659	0.988305	0.97217	0.901395	0.843914	0.905827	1.09105	0.240692
Ciclev10013007m	pacid=20799100 transcript=Ciclev10013007m locus=Ciclev10013007m.g ID=Ciclev10013007m.v1.0 annot-version=v1.0	24.84	4	4	5	153	16.5993	6.06201	0.867257	0.939739	0.976116	0.927704	0.897416	1.14849	1.07043	1.03878	0.893074	0.241177
Ciclev10008394m	pacid=20795092 transcript=Ciclev10008394m locus=Ciclev10008394m.g ID=Ciclev10008394m.v1.0 annot-version=v1.0	37.88	11	12	91	425	43.0114	7.63525	1.08645	1.01197	1.10152	1.06665	1.05672	0.983	1.01633	1.01868	1.04708	0.241728
Ciclev10024861m	pacid=20802165 transcript=Ciclev10024861m locus=Ciclev10024861m.g ID=Ciclev10024861m.v1.0 annot-version=v1.0	7.13	5	5	10	884	99.0457	6.771	0.96884	0.900498	0.865742	0.911693	1.02192	0.98797	0.910014	0.9733	0.936703	0.241799
Ciclev10009868m	pacid=20794701 transcript=Ciclev10009868m locus=Ciclev10009868m.g ID=Ciclev10009868m.v1.0 annot-version=v1.0	19.55	5	5	54	133	15.1223	11.8101	0.890226	0.825774	0.900409	0.872137	0.894202	0.712876	0.768434	0.791837	1.10141	0.241832
Ciclev10019859m	pacid=20811547 transcript=Ciclev10019859m locus=Ciclev10019859m.g ID=Ciclev10019859m.v1.0 annot-version=v1.0	44.53	16	20	142	494	54.1887	6.69775	0.985433	0.934782	1.05201	0.99074	1.03793	1.00931	1.14354	1.06359	0.931503	0.241895
Ciclev10008091m	pacid=20793197 transcript=Ciclev10008091m locus=Ciclev10008091m.g ID=Ciclev10008091m.v1.0 annot-version=v1.0	31.45	8	15	95	496	53.1544	7.57666	1.28753	1.12254	1.01328	1.14112	1.24709	1.194	1.38702	1.27603	0.894267	0.241939
Ciclev10008185m	pacid=20793177 transcript=Ciclev10008185m locus=Ciclev10008185m.g ID=Ciclev10008185m.v1.0 annot-version=v1.0	6.79	4	4	51	471	51.4585	9.42236	1.01097	1.00156	0.965419	0.992651	0.969533	0.909926	0.986881	0.955447	1.03894	0.242127
Ciclev10012484m	pacid=20796614 transcript=Ciclev10012484m locus=Ciclev10012484m.g ID=Ciclev10012484m.v1.0 annot-version=v1.0	45.66	10	10	28	265	29.8593	5.51611	1.11851	1.03059	1.00775	1.05229	0.989996	1.03308	0.979476	1.00085	1.05139	0.242444
Ciclev10024656m	pacid=20806077 transcript=Ciclev10024656m locus=Ciclev10024656m.g ID=Ciclev10024656m.v1.0 annot-version=v1.0	18.29	1	1	5	82	8.73911	3.96729	0.860794		0.789143	0.824968	1.00719		0.880957	0.944075	0.873838	0.242468
Ciclev10014694m	pacid=20817522 transcript=Ciclev10014694m locus=Ciclev10014694m.g ID=Ciclev10014694m.v1.0 annot-version=v1.0	1.35	1	1	2	591	67.7859	7.03467		1.01757	0.792432	0.905003		0.75031	0.66566	0.707985	1.27828	0.243042
Ciclev10001316m	pacid=20787300 transcript=Ciclev10001316m locus=Ciclev10001314m.g ID=Ciclev10001316m.v1.0 annot-version=v1.0	60.87	12	26	418	414	46.5207	7.18115	0.881863	1.03652	0.943725	0.954035	1.05701	1.11834	0.955268	1.04354	0.91423	0.243149
Ciclev10030198m	pacid=20814126 transcript=Ciclev10030198m locus=Ciclev10030198m.g ID=Ciclev10030198m.v1.0 annot-version=v1.0	72.98	18	20	428	285	31.593	6.29053	0.908888	0.821671	0.82977	0.853443	0.955551	0.8807	0.878451	0.904901	0.943134	0.243246
Ciclev10011843m	pacid=20797198 transcript=Ciclev10011843m locus=Ciclev10011843m.g ID=Ciclev10011843m.v1.0 annot-version=v1.0	31.73	8	10	42	416	46.5838	8.22119	1.07469	0.876528	0.935268	0.962162	0.826022	0.680049	0.965372	0.823814	1.16793	0.243336
Ciclev10002522m	pacid=20785417 transcript=Ciclev10002522m locus=Ciclev10002522m.g ID=Ciclev10002522m.v1.0 annot-version=v1.0	52.45	7	9	62	204	22.8424	5.71924	0.968139	1.06606	1.13669	1.05696	0.962762	0.963283	1.0265	0.984182	1.07395	0.243507
Ciclev10014886m	pacid=20816447 transcript=Ciclev10014886m locus=Ciclev10014886m.g ID=Ciclev10014886m.v1.0 annot-version=v1.0	7.78	3	3	5	527	60.1126	6.80029		0.98371	0.941859	0.962785		1.06714	0.994913	1.03102	0.933814	0.243672
Ciclev10024390m	pacid=20809969 transcript=Ciclev10024390m locus=Ciclev10024390m.g ID=Ciclev10024390m.v1.0 annot-version=v1.0	2.33	1	1	4	472	53.289	8.32373	0.7811	0.93122	1.119	0.943774	0.752945	0.833196	0.83037	0.805504	1.17166	0.243689
Ciclev10012319m	pacid=20797637 transcript=Ciclev10012319m locus=Ciclev10012319m.g ID=Ciclev10012319m.v1.0 annot-version=v1.0	32.89	8	8	55	301	33.1753	5.2876	1.05081	1.0518	1.20765	1.10342	0.962789	1.03332	1.06657	1.02089	1.08084	0.243818
Ciclev10004918m	pacid=20790521 transcript=Ciclev10004918m locus=Ciclev10004918m.g ID=Ciclev10004918m.v1.0 annot-version=v1.0	41.63	17	17	153	466	51.1	8.52881	0.952196	0.902294	0.860708	0.905066	0.946778	0.915799	1.00459	0.955721	0.946998	0.243874
Ciclev10012115m	pacid=20798438 transcript=Ciclev10012115m locus=Ciclev10012115m.g ID=Ciclev10012115m.v1.0 annot-version=v1.0	41.98	11	11	48	343	37.9314	4.67822	1.04115	0.973234	1.00628	1.00689	1.05918	1.0026	1.09679	1.05286	0.956339	0.243922
Ciclev10002868m	pacid=20786964 transcript=Ciclev10002868m locus=Ciclev10002868m.g ID=Ciclev10002868m.v1.0 annot-version=v1.0	37.5	3	3	7	120	13.026	8.63135	0.993791	0.944357		0.969074	1.00531	1.08252		1.04392	0.928306	0.244143
Ciclev10028959m	pacid=20812898 transcript=Ciclev10028959m locus=Ciclev10028959m.g ID=Ciclev10028959m.v1.0 annot-version=v1.0	24.32	4	5	132	292	32.0061	5.42725	2.18499	2.19851	2.01736	2.13362	1.40954	1.89712	2.16159	1.82275	1.17055	0.244145
Ciclev10007647m	pacid=20795011 transcript=Ciclev10007647m locus=Ciclev10007647m.g ID=Ciclev10007647m.v1.0 annot-version=v1.0	6.17	3	3	6	681	79.0533	8.71924		0.837649	0.878317	0.857983	1.26152	0.938689	0.959673	1.05329	0.814572	0.24509
Ciclev10012294m	pacid=20796358 transcript=Ciclev10012294m locus=Ciclev10012294m.g ID=Ciclev10012294m.v1.0 annot-version=v1.0	46.73	12	12	57	306	32.5284	9.48096	0.936866	0.948474	1.00991	0.965083	0.974888	0.999673	1.04882	1.00779	0.957618	0.245289
Ciclev10000031m	pacid=20787953 transcript=Ciclev10000031m locus=Ciclev10000030m.g ID=Ciclev10000031m.v1.0 annot-version=v1.0	2.37	4	4	4	1433	159.311	6.7124	0.99056	1.33855	0.97061	1.09991	0.884806	0.962639	0.954662	0.934035	1.17759	0.245525
Ciclev10009782m	pacid=20794158 transcript=Ciclev10009782m locus=Ciclev10009603m.g ID=Ciclev10009782m.v1.0 annot-version=v1.0	39.35	6	6	23	155	17.2107	9.40771	0.942325	1.03979	1.00979	0.997303	0.894839	0.826553	1.01635	0.912582	1.09284	0.246993
Ciclev10012615m	pacid=20797676 transcript=Ciclev10012615m locus=Ciclev10012615m.g ID=Ciclev10012615m.v1.0 annot-version=v1.0	17.57	4	4	6	239	27.0471	5.43994	0.902915	0.877481	0.913209	0.897868	0.997733	1.1518	0.873738	1.00776	0.890957	0.247012
Ciclev10003676m	pacid=20785494 transcript=Ciclev10003676m locus=Ciclev10003676m.g ID=Ciclev10003676m.v1.0 annot-version=v1.0	31.97	18	18	64	732	81.6511	6.13818	1.01158	1.0194	1.01557	1.01552	1.02124	0.969525	0.994464	0.995075	1.02054	0.247315
Ciclev10025660m	pacid=20801968 transcript=Ciclev10025660m locus=Ciclev10025660m.g ID=Ciclev10025660m.v1.0 annot-version=v1.0	26.98	9	9	39	430	47.0997	7.18115	0.916019	1.07383	0.998865	0.996239	1.04577	1.03284	1.14204	1.07355	0.927986	0.247409
Ciclev10009419m	pacid=20795993 transcript=Ciclev10009419m locus=Ciclev10009421m.g ID=Ciclev10009419m.v1.0 annot-version=v1.0	4.5	1	1	5	222	25.8414	6.59521		1.0805	0.928414	1.00446		1.10421	1.17706	1.14063	0.880614	0.247659
Ciclev10015561m	pacid=20816651 transcript=Ciclev10015561m locus=Ciclev10014997m.g ID=Ciclev10015561m.v1.0 annot-version=v1.0	19.43	6	6	30	386	42.4075	6.03662	1.10185	1.1073	0.995144	1.0681	0.956062	1.05032	1.01284	1.00641	1.0613	0.247934
Ciclev10015365m	pacid=20816042 transcript=Ciclev10015365m locus=Ciclev10014841m.g ID=Ciclev10015365m.v1.0 annot-version=v1.0	15.71	6	6	18	420	45.8251	4.7417	0.882671	1.10309	0.945072	0.976945	1.01625	0.739156	0.673473	0.809627	1.20666	0.248027
Ciclev10020742m	pacid=20811992 transcript=Ciclev10020742m locus=Ciclev10020742m.g ID=Ciclev10020742m.v1.0 annot-version=v1.0	18.13	4	6	22	364	39.7785	6.78564	1.10726	1.03497	1.13765	1.09329	1.14105	0.912946	0.822274	0.958756	1.14033	0.248115
Ciclev10013297m	pacid=20797640 transcript=Ciclev10013297m locus=Ciclev10013297m.g ID=Ciclev10013297m.v1.0 annot-version=v1.0	26.98	1	1	5	63	6.46077	4.25928	1.04967	1.24781		1.14874	0.960033	1.00857		0.9843	1.16706	0.248254
Ciclev10000344m	pacid=20788477 transcript=Ciclev10000344m locus=Ciclev10000344m.g ID=Ciclev10000344m.v1.0 annot-version=v1.0	3.32	2	2	3	784	87.638	6.27783	0.957819		1.11	1.03391	0.903682		0.91785	0.910766	1.13521	0.248405
Ciclev10014287m	pacid=20817123 transcript=Ciclev10014287m locus=Ciclev10014287m.g ID=Ciclev10014287m.v1.0 annot-version=v1.0	14.72	12	12	32	822	92.2526	6.88818	1.13051	1.08578	1.00081	1.07237	1.01216	1.05689	0.845261	0.971436	1.1039	0.248492
Ciclev10030651m	pacid=20803328 transcript=Ciclev10030651m locus=Ciclev10030651m.g ID=Ciclev10030651m.v1.0 annot-version=v1.0	8.86	6	6	20	926	100.846	7.00537	0.995907	0.948487	0.958139	0.967511	0.984021	0.987662	0.989823	0.987169	0.980087	0.248519
Ciclev10025587m	pacid=20801369 transcript=Ciclev10025587m locus=Ciclev10025461m.g ID=Ciclev10025587m.v1.0 annot-version=v1.0	14.86	4	4	7	451	48.2494	9.5249	0.86286	1.04081	0.955834	0.953169	0.902043	0.899279	0.828589	0.876637	1.0873	0.248644
Ciclev10010024m	pacid=20794974 transcript=Ciclev10010024m locus=Ciclev10009897m.g ID=Ciclev10010024m.v1.0 annot-version=v1.0	12.5	2	2	13	96	10.7007	5.09717	1.14086	1.00531	1.30733	1.15117	1.1496	0.905087	0.923264	0.992651	1.15969	0.248734
Ciclev10004665m	pacid=20789806 transcript=Ciclev10004665m locus=Ciclev10004461m.g ID=Ciclev10004665m.v1.0 annot-version=v1.0	1.62	1	1	7	555	61.8244	6.26514	0.905413	1.10423		1.00482	1.08482	1.21474	1.10338	1.13431	0.885842	0.248827
Ciclev10021390m	pacid=20808443 transcript=Ciclev10021390m locus=Ciclev10021390m.g ID=Ciclev10021390m.v1.0 annot-version=v1.0	18.79	4	4	13	298	32.8614	5.18604	0.694519	0.762456	0.812741	0.756572	0.709434	0.950104	0.992777	0.884105	0.855749	0.248975
Ciclev10007823m	pacid=20795360 transcript=Ciclev10007823m locus=Ciclev10007823m.g ID=Ciclev10007823m.v1.0 annot-version=v1.0	32.48	18	20	131	588	65.6497	5.41455	0.985174	1.02348	0.965563	0.991407	1.03022	0.991335	1.11212	1.04456	0.949116	0.24917
Ciclev10031379m	pacid=20805076 transcript=Ciclev10031379m locus=Ciclev10031378m.g ID=Ciclev10031379m.v1.0 annot-version=v1.0	20.75	7	9	39	482	53.1288	4.93213	1.22061	1.0125	0.966823	1.06664	1.00756	0.969378	0.861059	0.946	1.12753	0.249325
Ciclev10012121m	pacid=20798730 transcript=Ciclev10012121m locus=Ciclev10012121m.g ID=Ciclev10012121m.v1.0 annot-version=v1.0	4.11	1	2	4	341	39.1643	9.12939	1.18292	1.15784		1.17038	1.41575	1.22851		1.32213	0.885224	0.249397
Ciclev10019386m	pacid=20808871 transcript=Ciclev10019386m locus=Ciclev10019386m.g ID=Ciclev10019386m.v1.0 annot-version=v1.0	6.99	2	3	9	601	67.0284	8.67529		0.850344	0.944307	0.897325		0.837326	0.739872	0.788599	1.13787	0.24944
Ciclev10007151m	pacid=20792443 transcript=Ciclev10007151m locus=Ciclev10007151m.g ID=Ciclev10007151m.v1.0 annot-version=v1.0	22.65	1	8	37	446	48.0817	6.1001		0.920539	0.975616	0.948078		1.12032	0.995257	1.05779	0.896281	0.249574
Ciclev10015214m	pacid=20818819 transcript=Ciclev10015214m locus=Ciclev10015214m.g ID=Ciclev10015214m.v1.0 annot-version=v1.0	6.65	3	3	4	451	47.8052	8.20654	1.16735	1.14017	1.3304	1.21264	1.15625	1.08534	1.14119	1.12759	1.07542	0.24959
Ciclev10008541m	pacid=20794095 transcript=Ciclev10008541m locus=Ciclev10008541m.g ID=Ciclev10008541m.v1.0 annot-version=v1.0	10.38	4	4	13	395	45.9809	8.49951	1.0064	1.04853	1.04336	1.03276	1.03271	1.11219	1.06128	1.06873	0.966348	0.250186
Ciclev10025372m	pacid=20801688 transcript=Ciclev10025372m locus=Ciclev10025372m.g ID=Ciclev10025372m.v1.0 annot-version=v1.0	41.2	8	16	88	517	57.5034	8.47021	1.10111	0.801051	1.10634	1.00283	1.05681	1.24926	1.16645	1.15751	0.866373	0.250765
Ciclev10029584m	pacid=20812159 transcript=Ciclev10029584m locus=Ciclev10029584m.g ID=Ciclev10029584m.v1.0 annot-version=v1.0	16.8	3	3	6	125	14.6878	10.8726	0.950506	1.21476	1.23936	1.13488	0.937823	1.01044	1.05838	1.00221	1.13237	0.250803
Ciclev10025072m	pacid=20800657 transcript=Ciclev10025072m locus=Ciclev10025072m.g ID=Ciclev10025072m.v1.0 annot-version=v1.0	1.19	1	1	2	673	78.74	9.20264		0.971102	1.20176	1.08643		0.848062	0.932166	0.890114	1.22055	0.250886
Ciclev10014083m	pacid=20817862 transcript=Ciclev10014083m locus=Ciclev10014083m.g ID=Ciclev10014083m.v1.0 annot-version=v1.0	5.74	6	6	15	1167	133.949	7.6499		1.11211	1.03092	1.07152		1.00597	0.836283	0.921129	1.16327	0.250952
Ciclev10007568m	pacid=20795659 transcript=Ciclev10007568m locus=Ciclev10007554m.g ID=Ciclev10007568m.v1.0 annot-version=v1.0	2.42	2	2	3	743	79.5542	8.26514	1.0827	1.16738		1.12504	1.05373	0.862834		0.958281	1.17402	0.251343
Ciclev10029463m	pacid=20813442 transcript=Ciclev10029463m locus=Ciclev10029463m.g ID=Ciclev10029463m.v1.0 annot-version=v1.0	12.58	2	2	3	159	17.3259	6.56592	0.95448		1.30538	1.12993	0.889195		0.788026	0.838611	1.34739	0.251674
Ciclev10001370m	pacid=20786644 transcript=Ciclev10001370m locus=Ciclev10001370m.g ID=Ciclev10001370m.v1.0 annot-version=v1.0	17	6	7	26	400	45.2405	5.23682	0.985641	0.985262	1.02022	0.99704	0.828846	0.91976	1.01818	0.922262	1.08108	0.251879
Ciclev10003301m	pacid=20788180 transcript=Ciclev10003301m locus=Ciclev10003301m.g ID=Ciclev10003301m.v1.0 annot-version=v1.0	0.9	1	2	3	1892	214.666	5.04639	1.03231	1.09386		1.06309	0.911789	1.01828		0.965034	1.10161	0.2519
Ciclev10016226m	pacid=20819263 transcript=Ciclev10016226m locus=Ciclev10016225m.g ID=Ciclev10016226m.v1.0 annot-version=v1.0	12.36	3	3	11	275	31.0342	5.63037	1.28065	0.848851	0.898061	1.00919	0.721535	0.830442	0.893531	0.81517	1.23801	0.253045
Ciclev10022890m	pacid=20811646 transcript=Ciclev10022890m locus=Ciclev10022892m.g ID=Ciclev10022890m.v1.0 annot-version=v1.0	18.85	2	2	3	122	13.9416	5.33838	1.48028		0.907715	1.194	0.741188		0.738386	0.739787	1.61398	0.253511
Ciclev10030583m	pacid=20804642 transcript=Ciclev10030583m locus=Ciclev10030583m.g ID=Ciclev10030583m.v1.0 annot-version=v1.0	17.73	14	16	35	1049	115.323	4.88135	0.944961	1.02201	0.998557	0.988509	0.966427	0.9456	0.959254	0.957094	1.03282	0.254042
Ciclev10014943m	pacid=20815395 transcript=Ciclev10014943m locus=Ciclev10014943m.g ID=Ciclev10014943m.v1.0 annot-version=v1.0	1.95	1	1	2	514	55.0183	5.87158	1.27555	1.07504		1.17529	1.04839	0.814846		0.931618	1.26156	0.25419
Ciclev10008297m	pacid=20793834 transcript=Ciclev10008297m locus=Ciclev10007808m.g ID=Ciclev10008297m.v1.0 annot-version=v1.0	33.48	9	9	21	445	48.8216	5.69385	0.899002	0.756539	0.451697	0.702413	0.990934	0.759973	0.954853	0.90192	0.778797	0.25473
Ciclev10011959m	pacid=20797454 transcript=Ciclev10011959m locus=Ciclev10011959m.g ID=Ciclev10011959m.v1.0 annot-version=v1.0	14.44	5	5	26	381	41.8763	9.0415	1.0287	1.02005	0.867052	0.971936	0.950095	0.842325	0.879208	0.890542	1.0914	0.254881
Ciclev10009645m	pacid=20793203 transcript=Ciclev10009645m locus=Ciclev10009645m.g ID=Ciclev10009645m.v1.0 annot-version=v1.0	37.91	4	6	31	182	20.4067	5.37646	1.19238	1.07898	1.08731	1.11956	0.944486	1.11611	1.05143	1.03734	1.07926	0.255024
Ciclev10008892m	pacid=20793965 transcript=Ciclev10008892m locus=Ciclev10008892m.g ID=Ciclev10008892m.v1.0 annot-version=v1.0	15.45	5	5	27	330	36.2551	9.30518	1.1965	1.00958	1.13345	1.11318	1.10687	0.972896	0.981744	1.0205	1.09081	0.255549
Ciclev10026708m	pacid=20800995 transcript=Ciclev10026708m locus=Ciclev10026708m.g ID=Ciclev10026708m.v1.0 annot-version=v1.0	17.01	3	3	5	147	16.6129	6.02393	0.982534		0.99908	0.990807	1.03395		1.18109	1.10752	0.894616	0.255623
Ciclev10027829m	pacid=20814835 transcript=Ciclev10027829m locus=Ciclev10027829m.g ID=Ciclev10027829m.v1.0 annot-version=v1.0	11.59	8	8	17	820	90.2718	5.97314	0.843551	1.05568	1.03885	0.979361	0.875651	0.806449	0.943286	0.875129	1.1191	0.256012
Ciclev10010931m	pacid=20798654 transcript=Ciclev10010931m locus=Ciclev10010931m.g ID=Ciclev10010931m.v1.0 annot-version=v1.0	15.26	12	15	44	1252	136.258	8.42627	1.05863	0.946828	0.919386	0.974948	1.08587	1.01508	1.01677	1.03924	0.938136	0.25604
Ciclev10008040m	pacid=20793622 transcript=Ciclev10008040m locus=Ciclev10008040m.g ID=Ciclev10008040m.v1.0 annot-version=v1.0	52.73	17	18	225	512	55.2681	6.85889	0.987641	1.08516	1.03384	1.03555	0.973886	0.982641	1.02315	0.993225	1.04261	0.25642
Ciclev10000741m	pacid=20785687 transcript=Ciclev10000741m locus=Ciclev10000741m.g ID=Ciclev10000741m.v1.0 annot-version=v1.0	5.75	2	3	7	557	63.3381	6.99072	1.36093	1.12413	0.909801	1.13162	1.12555	0.798128	0.796053	0.906576	1.24824	0.256581
Ciclev10008262m	pacid=20795860 transcript=Ciclev10008262m locus=Ciclev10008262m.g ID=Ciclev10008262m.v1.0 annot-version=v1.0	6.62	3	3	4	453	50.0014	10.0522	0.773208		0.94014	0.856674	0.968913		1.01777	0.993343	0.862415	0.256677
Ciclev10018995m	pacid=20808163 transcript=Ciclev10018995m locus=Ciclev10018995m.g ID=Ciclev10018995m.v1.0 annot-version=v1.0	34.45	22	22	100	746	83.6868	9.56885	0.96983	0.980617	1.01732	0.989256	1.08273	0.996283	1.00961	1.02954	0.960871	0.256705
Ciclev10018483m	pacid=20810653 transcript=Ciclev10018483m locus=Ciclev10018483m.g ID=Ciclev10018483m.v1.0 annot-version=v1.0	6.25	8	8	16	1505	171.051	6.68311	1.0303	1.01104	1.06711	1.03615	1.02131	1.1266	1.10264	1.08352	0.956283	0.257009
Ciclev10006053m	pacid=20790727 transcript=Ciclev10006053m locus=Ciclev10005906m.g ID=Ciclev10006053m.v1.0 annot-version=v1.0	31.18	4	4	9	170	19.105	5.24951	0.940797	1.24512		1.09296	0.886263	0.805465		0.845864	1.29212	0.257094
Ciclev10033000m	pacid=20804271 transcript=Ciclev10033000m locus=Ciclev10033000m.g ID=Ciclev10033000m.v1.0 annot-version=v1.0	21.62	3	3	15	148	15.5544	6.72705	1.41622	1.16665	1.27432	1.28573	1.60215	1.38322	1.31719	1.43419	0.896489	0.257161
Ciclev10030627m	pacid=20803502 transcript=Ciclev10030627m locus=Ciclev10030627m.g ID=Ciclev10030627m.v1.0 annot-version=v1.0	5.67	3	6	12	988	111.969	6.34131	1.1073	1.04349	0.952214	1.03434	1.00172	0.982104	0.910244	0.96469	1.0722	0.25835
Ciclev10024776m	pacid=20802268 transcript=Ciclev10024776m locus=Ciclev10024776m.g ID=Ciclev10024776m.v1.0 annot-version=v1.0	23.6	20	20	49	1055	119.789	7.94287	0.922685	0.937528	0.92671	0.928974	1.03489	0.952674	0.928056	0.971872	0.955861	0.258573
Ciclev10009335m	pacid=20793133 transcript=Ciclev10009335m locus=Ciclev10009335m.g ID=Ciclev10009335m.v1.0 annot-version=v1.0	24.79	4	4	8	238	26.4536	5.16064	1.01312	1.05079	1.08077	1.04822	0.848024	1.03771	1.01207	0.965937	1.08519	0.258721
Ciclev10008175m	pacid=20795922 transcript=Ciclev10008175m locus=Ciclev10008112m.g ID=Ciclev10008175m.v1.0 annot-version=v1.0	15.4	6	6	47	474	52.9994	6.20166	1.02254	1.10064	1.04604	1.05641	0.919629	1.06138	1.00245	0.994484	1.06227	0.25953
Ciclev10028894m	pacid=20812509 transcript=Ciclev10028894m locus=Ciclev10028894m.g ID=Ciclev10028894m.v1.0 annot-version=v1.0	45.63	3	14	78	309	34.2159	6.65381	0.672711	1.01999	0.993871	0.895523	0.977124	1.09896	1.07367	1.04992	0.852947	0.25972
Ciclev10009340m	pacid=20792612 transcript=Ciclev10009340m locus=Ciclev10008632m.g ID=Ciclev10009340m.v1.0 annot-version=v1.0	18.91	3	4	14	238	26.4919	7.1958	1.25652	1.05466	1.08435	1.13185	0.988824	1.10183	1.02497	1.03854	1.08984	0.260233
Ciclev10011495m	pacid=20797496 transcript=Ciclev10011495m locus=Ciclev10011495m.g ID=Ciclev10011495m.v1.0 annot-version=v1.0	1.74	1	1	3	518	58.8458	6.20166	0.979305	0.995833	1.15806	1.0444	0.931142	0.873412	1.0364	0.946985	1.10287	0.260333
Ciclev10019532m	pacid=20807526 transcript=Ciclev10019532m locus=Ciclev10019532m.g ID=Ciclev10019532m.v1.0 annot-version=v1.0	10.89	6	6	16	560	60.5327	6.03662	0.957614	1.46337	1.07784	1.16628	1.32088	1.38541	1.39941	1.36857	0.852188	0.260451
Ciclev10032467m	pacid=20804819 transcript=Ciclev10032467m locus=Ciclev10032214m.g ID=Ciclev10032467m.v1.0 annot-version=v1.0	9.51	2	2	5	263	29.0726	9.53955	1.2993	1.5688		1.43405	1.21345	1.23471		1.22408	1.17153	0.260552
Ciclev10029516m	pacid=20812684 transcript=Ciclev10029516m locus=Ciclev10029417m.g ID=Ciclev10029516m.v1.0 annot-version=v1.0	12.33	1	1	98	146	15.0806	8.25049	0.918511	0.974935	0.769927	0.887791	0.816204	0.838335	0.74387	0.79947	1.11047	0.260646
Ciclev10028695m	pacid=20814606 transcript=Ciclev10028695m locus=Ciclev10028695m.g ID=Ciclev10028695m.v1.0 annot-version=v1.0	38.15	13	13	70	367	41.1494	5.23682	0.982836	0.964095	0.996154	0.981029	0.930157	0.971927	0.974059	0.958715	1.02327	0.260762
Ciclev10011792m	pacid=20798178 transcript=Ciclev10011792m locus=Ciclev10011792m.g ID=Ciclev10011792m.v1.0 annot-version=v1.0	36.07	13	14	84	427	46.292	5.93506	0.978866	1.02323	0.818733	0.940276	1.06611	0.999382	1.01192	1.0258	0.916624	0.261017
Ciclev10009490m	pacid=20792935 transcript=Ciclev10009490m locus=Ciclev10009141m.g ID=Ciclev10009490m.v1.0 annot-version=v1.0	4.33	1	1	4	208	22.9361	9.37842	1.0535	1.61646	0.930638	1.2002	0.963063	0.855537	0.944282	0.920961	1.30321	0.261414
Ciclev10025780m	pacid=20800856 transcript=Ciclev10025780m locus=Ciclev10025780m.g ID=Ciclev10025780m.v1.0 annot-version=v1.0	10.08	3	3	6	397	42.5372	5.23682		0.831204	1.08074	0.95597		0.762469	0.763345	0.762907	1.25306	0.261842
Ciclev10018568m	pacid=20810383 transcript=Ciclev10018568m locus=Ciclev10018568m.g ID=Ciclev10018568m.v1.0 annot-version=v1.0	2.37	3	3	5	1183	130.954	5.79541	1.00403	1.03593	0.93226	0.990739	0.968064	0.961872	0.863358	0.931098	1.06406	0.26204
Ciclev10015073m	pacid=20818872 transcript=Ciclev10015073m locus=Ciclev10015040m.g ID=Ciclev10015073m.v1.0 annot-version=v1.0	26.65	8	11	19	484	53.1942	7.31299	1.27946	1.01281	1.19998	1.16408	1.13434	1.02566	0.970148	1.04338	1.11568	0.262328
Ciclev10000802m	pacid=20785384 transcript=Ciclev10000802m locus=Ciclev10000808m.g ID=Ciclev10000802m.v1.0 annot-version=v1.0	14.31	7	7	12	538	60.4568	6.39209	1.11907	1.28627	1.37607	1.26047	1.22352	1.47325	1.65962	1.45213	0.868019	0.262489
Ciclev10030484m	pacid=20805053 transcript=Ciclev10030484m locus=Ciclev10030479m.g ID=Ciclev10030484m.v1.0 annot-version=v1.0	1.62	3	3	5	1733	195.369	4.75439	0.923469	0.883658	1.11984	0.975656	1.01852	1.05626	1.31993	1.13157	0.862213	0.262517
Ciclev10021798m	pacid=20809057 transcript=Ciclev10021798m locus=Ciclev10021773m.g ID=Ciclev10021798m.v1.0 annot-version=v1.0	25	5	5	47	256	27.2743	9.36377	0.71695	0.889523	0.919651	0.842041	0.933205	0.873592	1.01091	0.939235	0.896518	0.262666
Ciclev10028211m	pacid=20812516 transcript=Ciclev10028211m locus=Ciclev10028211m.g ID=Ciclev10028211m.v1.0 annot-version=v1.0	15.77	8	8	17	520	56.5949	5.38916	1.07802	0.903685	1.14707	1.04292	0.891972	0.989688	0.943625	0.941762	1.10742	0.262957
Ciclev10029329m	pacid=20812916 transcript=Ciclev10029329m locus=Ciclev10029324m.g ID=Ciclev10029329m.v1.0 annot-version=v1.0	16.58	3	4	18	193	22.0894	8.95361	0.845027	0.73173	0.742257	0.773005	0.877317	0.844971	0.778114	0.833467	0.927457	0.263087
Ciclev10013000m	pacid=20798727 transcript=Ciclev10013000m locus=Ciclev10012892m.g ID=Ciclev10013000m.v1.0 annot-version=v1.0	24.68	3	4	26	154	18.1404	9.26123		0.977118	1.08503	1.03107		0.936395	0.956752	0.946574	1.08927	0.263678
Ciclev10032714m	pacid=20802710 transcript=Ciclev10032714m locus=Ciclev10032714m.g ID=Ciclev10032714m.v1.0 annot-version=v1.0	73.27	2	15	117	217	23.9202	7.81104	1.00714	0.808404		0.907773	1.07058	1.05191		1.06125	0.855384	0.263954
Ciclev10030480m	pacid=20803177 transcript=Ciclev10030480m locus=Ciclev10030480m.g ID=Ciclev10030480m.v1.0 annot-version=v1.0	5.64	3	3	12	1807	192.423	7.2251	0.784915	1.1796	0.831043	0.931851	0.758239	0.717111	0.821907	0.765752	1.21691	0.265009
Ciclev10028213m	pacid=20814857 transcript=Ciclev10028213m locus=Ciclev10028213m.g ID=Ciclev10028213m.v1.0 annot-version=v1.0	5	2	3	9	520	59.3923	6.21436	1.79598	1.20994	1.04868	1.35154	1.1075	0.967071	1.08233	1.0523	1.28436	0.265107
Ciclev10015444m	pacid=20818467 transcript=Ciclev10015444m locus=Ciclev10015444m.g ID=Ciclev10015444m.v1.0 annot-version=v1.0	21.67	6	6	19	406	44.3947	6.04932	1.14567	0.936757	1.06161	1.04801	0.914051	0.952463	1.01539	0.960635	1.09096	0.265152
Ciclev10033542m	pacid=20804403 transcript=Ciclev10033542m locus=Ciclev10033542m.g ID=Ciclev10033542m.v1.0 annot-version=v1.0	50	3	3	15	72	8.22827	8.55811		0.295915	0.478998	0.387457	0.817223	0.368936	0.805741	0.663967	0.583548	0.265173
Ciclev10004167m	pacid=20789525 transcript=Ciclev10004167m locus=Ciclev10004167m.g ID=Ciclev10004167m.v1.0 annot-version=v1.0	42.76	52	52	245	1312	144.101	5.84619	0.983383	1.06454	1.02974	1.02589	0.993578	1.01403	0.960851	0.989488	1.03679	0.265615
Ciclev10002099m	pacid=20787722 transcript=Ciclev10002099m locus=Ciclev10002099m.g ID=Ciclev10002099m.v1.0 annot-version=v1.0	30.6	7	7	69	281	29.6388	6.59521	1.18394	1.09249	1.215	1.16381	1.17225	1.24525	1.24467	1.22072	0.953378	0.265847
Ciclev10022566m	pacid=20810150 transcript=Ciclev10022566m locus=Ciclev10022566m.g ID=Ciclev10022566m.v1.0 annot-version=v1.0	25.88	3	4	11	170	19.3048	5.10986		1.0674	1.00167	1.03454		1.07243	1.12848	1.10046	0.940097	0.266471
Ciclev10019410m	pacid=20808873 transcript=Ciclev10019410m locus=Ciclev10019410m.g ID=Ciclev10019410m.v1.0 annot-version=v1.0	20.64	9	10	62	591	66.0673	8.23584	1.06169	1.22665	0.977088	1.08848	1.01904	0.951053	1.00119	0.990428	1.099	0.266817
Ciclev10014095m	pacid=20818095 transcript=Ciclev10014095m locus=Ciclev10014095m.g ID=Ciclev10014095m.v1.0 annot-version=v1.0	2.04	2	2	4	1127	127.247	6.75635	1.34019		1.11979	1.22999	0.990637		1.09654	1.04359	1.17862	0.266841
Ciclev10021829m	pacid=20809087 transcript=Ciclev10021829m locus=Ciclev10021461m.g ID=Ciclev10021829m.v1.0 annot-version=v1.0	11.11	3	3	10	252	28.2383	9.23193	1.02177	0.887385		0.954575	1.00542	1.03037	1.03904	1.02495	0.931343	0.267021
Ciclev10012592m	pacid=20797120 transcript=Ciclev10012592m locus=Ciclev10012191m.g ID=Ciclev10012592m.v1.0 annot-version=v1.0	13.93	2	2	3	244	26.9767	6.27783		1.2733	1.26515	1.26922		1.23225	1.09156	1.1619	1.09237	0.267177
Ciclev10014140m	pacid=20815345 transcript=Ciclev10014140m locus=Ciclev10014140m.g ID=Ciclev10014140m.v1.0 annot-version=v1.0	44.8	22	37	417	1000	108.953	7.59131	0.995421	0.979909	0.92808	0.967804	0.973562	0.99757	1.04582	1.00565	0.962365	0.267801
Ciclev10008977m	pacid=20793152 transcript=Ciclev10008977m locus=Ciclev10008977m.g ID=Ciclev10008977m.v1.0 annot-version=v1.0	24.68	7	7	16	312	36.112	9.65674	0.932574	0.879477	1.13277	0.981608	0.818723	0.940934	0.856617	0.872091	1.12558	0.267831
Ciclev10013159m	pacid=20797259 transcript=Ciclev10013159m locus=Ciclev10013159m.g ID=Ciclev10013159m.v1.0 annot-version=v1.0	39.47	4	4	11	114	12.1825	10.0522	0.849799	0.703025	0.72619	0.759671	0.724152	0.602479	0.719207	0.681946	1.11398	0.268022
Ciclev10021770m	pacid=20808424 transcript=Ciclev10021770m locus=Ciclev10021764m.g ID=Ciclev10021770m.v1.0 annot-version=v1.0	33.85	9	10	74	260	29.5598	10.814	1.08125	1.01346	1.04732	1.04735	1.02013	1.01533	1.02947	1.02164	1.02516	0.268144
Ciclev10016847m	pacid=20816870 transcript=Ciclev10016847m locus=Ciclev10016847m.g ID=Ciclev10016847m.v1.0 annot-version=v1.0	15.96	3	3	7	188	20.426	5.2749	1.24369	1.03989	1.06163	1.11507	0.953665	0.987653	1.10122	1.01418	1.09948	0.268165
Ciclev10005477m	pacid=20791194 transcript=Ciclev10005477m locus=Ciclev10005476m.g ID=Ciclev10005477m.v1.0 annot-version=v1.0	24.04	5	5	11	312	33.9198	5.17334	1.04043	1.00135	0.925223	0.989003	0.934649	1.39655	1.16599	1.16573	0.848398	0.268247
Ciclev10015197m	pacid=20817223 transcript=Ciclev10015197m locus=Ciclev10015197m.g ID=Ciclev10015197m.v1.0 annot-version=v1.0	12.94	4	4	28	456	49.0264	8.55811	1.12426	1.1997		1.16198	1.09408	0.867355		0.980719	1.18482	0.268515
Ciclev10020158m	pacid=20806622 transcript=Ciclev10020158m locus=Ciclev10020158m.g ID=Ciclev10020158m.v1.0 annot-version=v1.0	56.31	22	22	244	444	49.8321	5.84619	0.903193	0.977515	0.947011	0.942573	0.931567	1.00836	1.02867	0.989531	0.952545	0.268783
Ciclev10030761m	pacid=20804443 transcript=Ciclev10030761m locus=Ciclev10030749m.g ID=Ciclev10030761m.v1.0 annot-version=v1.0	28	12	14	63	775	86.6899	7.04932	0.974975	0.99932	0.893414	0.955903	0.952764	0.850909	0.89677	0.900148	1.06194	0.269267
Ciclev10015824m	pacid=20816111 transcript=Ciclev10015824m locus=Ciclev10015824m.g ID=Ciclev10015824m.v1.0 annot-version=v1.0	7.29	3	3	8	343	36.8149	8.27979	0.827795	0.940696		0.884245	1.03274	0.948709		0.990724	0.892525	0.269417
Ciclev10005278m	pacid=20792351 transcript=Ciclev10005278m locus=Ciclev10005278m.g ID=Ciclev10005278m.v1.0 annot-version=v1.0	8.99	3	3	10	356	39.591	9.20264	1.42386	1.04683	1.10707	1.19259	0.953172	0.934135	1.16127	1.01619	1.17358	0.26947
Ciclev10024908m	pacid=20801000 transcript=Ciclev10024908m locus=Ciclev10024908m.g ID=Ciclev10024908m.v1.0 annot-version=v1.0	21.53	13	14	81	813	90.2263	5.71924	0.892358	0.927312	0.886211	0.90196	0.919706	0.907213	0.941031	0.92265	0.977576	0.26976
Ciclev10003705m	pacid=20786256 transcript=Ciclev10003705m locus=Ciclev10003705m.g ID=Ciclev10003705m.v1.0 annot-version=v1.0	57.14	4	4	30	84	9.68007	8.93896	1.11969	1.24108	1.09593	1.15223	1.00806	1.11354	1.11537	1.07899	1.06788	0.269999
Ciclev10014963m	pacid=20816925 transcript=Ciclev10014963m locus=Ciclev10014963m.g ID=Ciclev10014963m.v1.0 annot-version=v1.0	45.69	19	23	168	510	55.3749	7.73779	1.06407	0.99294	0.985439	1.01415	1.04181	1.04044	1.0589	1.04705	0.968577	0.270427
Ciclev10011166m	pacid=20798935 transcript=Ciclev10011166m locus=Ciclev10011166m.g ID=Ciclev10011166m.v1.0 annot-version=v1.0	12.88	7	8	20	730	82.0112	9.15869	0.803692		0.911155	0.857424	0.716948		0.796687	0.756818	1.13293	0.271562
Ciclev10012725m	pacid=20796508 transcript=Ciclev10012725m locus=Ciclev10012725m.g ID=Ciclev10012725m.v1.0 annot-version=v1.0	73.61	2	15	128	216	23.8982	7.82568		1.87283	1.28748	1.58016		1.24079	0.910522	1.07566	1.46902	0.272103
Ciclev10032385m	pacid=20805158 transcript=Ciclev10032385m locus=Ciclev10032365m.g ID=Ciclev10032385m.v1.0 annot-version=v1.0	26.37	6	6	16	273	31.484	7.38623	0.965746	1.13104	1.30254	1.13311	0.957064	1.02238	1.03707	1.00551	1.1269	0.272193
Ciclev10005663m	pacid=20790456 transcript=Ciclev10005663m locus=Ciclev10005663m.g ID=Ciclev10005663m.v1.0 annot-version=v1.0	53.64	6	16	197	261	29.7949	9.77393	1.04242	0.872316	0.945962	0.953566	1.13328	1.02303	0.968158	1.04149	0.915577	0.272507
Ciclev10018372m	pacid=20815270 transcript=Ciclev10018372m locus=Ciclev10018402m.g ID=Ciclev10018372m.v1.0 annot-version=v1.0	4.61	1	1	7	217	24.8274	5.80811	1.07093	1.05064	1.04002	1.05386	1.08748	0.92841	0.955075	0.990323	1.06416	0.272802
Ciclev10031914m	pacid=20804825 transcript=Ciclev10031914m locus=Ciclev10031914m.g ID=Ciclev10031914m.v1.0 annot-version=v1.0	47.65	7	13	178	361	41.2496	6.84424	1.0987	1.27259	1.15033	1.17387	1.08783	1.14013	1.08646	1.10481	1.06251	0.273842
Ciclev10027978m	pacid=20812489 transcript=Ciclev10027978m locus=Ciclev10027911m.g ID=Ciclev10027978m.v1.0 annot-version=v1.0	1.84	1	1	3	651	69.6453	9.42236	0.985669	0.926662	0.977316	0.963216	0.993079	0.967216	1.1078	1.0227	0.941838	0.274099
Ciclev10027840m	pacid=20812138 transcript=Ciclev10027840m locus=Ciclev10027840m.g ID=Ciclev10027840m.v1.0 annot-version=v1.0	55.51	10	44	657	807	89.4455	5.2876	0.9252	0.817545	0.980584	0.907776	1.00834	1.01895	0.9161	0.981131	0.925235	0.274248
Ciclev10003518m	pacid=20785728 transcript=Ciclev10003518m locus=Ciclev10003518m.g ID=Ciclev10003518m.v1.0 annot-version=v1.0	31.09	14	14	40	608	68.5584	5.52881	0.983865	1.06425	1.09918	1.0491	1.01984	0.994361	1.00018	1.00479	1.04409	0.274279
Ciclev10007051m	pacid=20790695 transcript=Ciclev10007051m locus=Ciclev10007051m.g ID=Ciclev10007051m.v1.0 annot-version=v1.0	1.3	1	1	8	540	62.3345	6.68311	0.966599	0.985183	0.987496	0.979759	0.950121	1.06071	1.16225	1.05769	0.926316	0.274566
Ciclev10006509m	pacid=20789579 transcript=Ciclev10006509m locus=Ciclev10006509m.g ID=Ciclev10006509m.v1.0 annot-version=v1.0	29.53	12	12	53	447	49.2723	5.66846	1.00488	0.844623	0.904947	0.918151	1.02561	0.930226	1.00776	0.987866	0.929429	0.274808
Ciclev10032014m	pacid=20805824 transcript=Ciclev10032014m locus=Ciclev10032014m.g ID=Ciclev10032014m.v1.0 annot-version=v1.0	70.09	14	24	1060	341	37.1923	7.92822	0.872169	0.945183	0.979535	0.932296	0.949275	1.07149	0.964793	0.995187	0.936804	0.275052
Ciclev10030969m	pacid=20802476 transcript=Ciclev10030969m locus=Ciclev10030969m.g ID=Ciclev10030969m.v1.0 annot-version=v1.0	62.92	34	34	417	623	68.6379	5.43994	0.996544	1.06465	1.03815	1.03311	1.03103	1.07369	1.10561	1.07011	0.965426	0.275529
Ciclev10021544m	pacid=20808270 transcript=Ciclev10021544m locus=Ciclev10020137m.g ID=Ciclev10021544m.v1.0 annot-version=v1.0	7.8	1	2	3	282	33.0717	8.45557		0.903858	1.0285	0.96618		1.04736	1.07453	1.06094	0.910681	0.2757
Ciclev10007631m	pacid=20793926 transcript=Ciclev10007631m locus=Ciclev10007631m.g ID=Ciclev10007631m.v1.0 annot-version=v1.0	13.55	9	10	28	701	78.6042	6.18896	0.969623	0.934898	0.901696	0.935406	0.951188	0.801778	0.873945	0.875637	1.06826	0.275756
Ciclev10002260m	pacid=20787350 transcript=Ciclev10002260m locus=Ciclev10002260m.g ID=Ciclev10002260m.v1.0 annot-version=v1.0	17.53	3	4	15	251	28.0636	5.24951	0.940535	1.07896	0.868752	0.96275	1.02033	1.04255	1.0628	1.04189	0.924039	0.276736
Ciclev10028899m	pacid=20812901 transcript=Ciclev10028899m locus=Ciclev10028899m.g ID=Ciclev10028899m.v1.0 annot-version=v1.0	13.31	3	3	5	308	34.4363	8.66064		1.479	1.02806	1.25353		0.812536	0.98158	0.897058	1.39738	0.276911
Ciclev10011619m	pacid=20797759 transcript=Ciclev10011619m locus=Ciclev10011552m.g ID=Ciclev10011619m.v1.0 annot-version=v1.0	7.48	3	3	10	481	54.1289	4.86865	1.03829	1.51007	1.1057	1.21802	1.03367	1.0874	0.960126	1.02706	1.18592	0.277021
Ciclev10022212m	pacid=20809459 transcript=Ciclev10022212m locus=Ciclev10022212m.g ID=Ciclev10022212m.v1.0 annot-version=v1.0	64.32	9	10	230	213	23.8134	6.63916	1.18049	1.21571	1.3423	1.24616	1.23846	1.49257	1.34162	1.35755	0.917952	0.277311
Ciclev10021656m	pacid=20810367 transcript=Ciclev10021656m locus=Ciclev10021217m.g ID=Ciclev10021656m.v1.0 annot-version=v1.0	28.89	5	5	12	270	29.0557	5.19873	1.01335	0.937528	1.21636	1.05575	0.866347	0.975324	0.981586	0.941086	1.12184	0.277324
Ciclev10017015m	pacid=20815733 transcript=Ciclev10017015m locus=Ciclev10017015m.g ID=Ciclev10017015m.v1.0 annot-version=v1.0	5.59	1	1	13	161	17.5304	12.3374	1.05135	1.08058	1.18075	1.10422	0.912225	1.08045	1.06816	1.02028	1.08228	0.277438
Ciclev10014760m	pacid=20816709 transcript=Ciclev10014760m locus=Ciclev10014760m.g ID=Ciclev10014760m.v1.0 annot-version=v1.0	37.81	16	16	116	566	61.5435	6.30322	1.00483	0.969646	1.02361	0.999362	0.944377	0.940707	1.00973	0.964939	1.03567	0.277956
Ciclev10032538m	pacid=20804612 transcript=Ciclev10032538m locus=Ciclev10032537m.g ID=Ciclev10032538m.v1.0 annot-version=v1.0	48.61	6	10	192	251	27.016	5.68115	0.990814	1.02623	0.8631	0.960049	0.98582	1.02712	1.07995	1.03096	0.931216	0.278035
Ciclev10023088m	pacid=20809928 transcript=Ciclev10023088m locus=Ciclev10023088m.g ID=Ciclev10023088m.v1.0 annot-version=v1.0	39.77	3	3	24	88	9.47152	5.36377	0.993475	1.11428	1.27825	1.12867	0.97505	1.06425	1.02147	1.02026	1.10626	0.278101
Ciclev10021050m	pacid=20808645 transcript=Ciclev10021050m locus=Ciclev10021050m.g ID=Ciclev10021050m.v1.0 annot-version=v1.0	8.36	3	3	3	335	38.3943	5.46533	1.69664	1.04161	1.46383	1.40069	1.21513	1.13063	1.12701	1.15759	1.21001	0.278114
Ciclev10008195m	pacid=20795486 transcript=Ciclev10008195m locus=Ciclev10007752m.g ID=Ciclev10008195m.v1.0 annot-version=v1.0	5.57	3	3	7	467	51.2144	7.32764	0.900741	1.02163	0.913091	0.945154	0.901973	0.867456	0.912949	0.894126	1.05707	0.278973
Ciclev10016438m	pacid=20816862 transcript=Ciclev10016438m locus=Ciclev10016025m.g ID=Ciclev10016438m.v1.0 annot-version=v1.0	9.43	2	2	13	244	27.5293	8.38232	1.08241	1.07192	1.2858	1.14671	1.02767	1.01039	1.11441	1.05083	1.09125	0.27935
Ciclev10019482m	pacid=20809023 transcript=Ciclev10019482m locus=Ciclev10019482m.g ID=Ciclev10019482m.v1.0 annot-version=v1.0	36.35	13	14	37	575	63.1249	4.80518	1.13066	0.972246	1.35021	1.15104	1.0153	0.988046	1.03557	1.01297	1.1363	0.279409
Ciclev10001487m	pacid=20785904 transcript=Ciclev10001487m locus=Ciclev10001487m.g ID=Ciclev10001487m.v1.0 annot-version=v1.0	14.4	4	4	5	382	43.2618	6.68311	0.954812		0.90225	0.928531	0.835563		0.899702	0.867633	1.07019	0.279649
Ciclev10021294m	pacid=20810770 transcript=Ciclev10021294m locus=Ciclev10021020m.g ID=Ciclev10021294m.v1.0 annot-version=v1.0	8.12	3	3	10	308	33.9814	5.70654	1.0603	1.30774	1.27407	1.21404	1.05585	1.13923	1.13864	1.11124	1.09251	0.279656
Ciclev10029225m	pacid=20814196 transcript=Ciclev10029225m locus=Ciclev10029225m.g ID=Ciclev10029225m.v1.0 annot-version=v1.0	34.07	6	6	37	226	24.3434	4.62744	1.13408	1.04296	1.08447	1.08717	0.991189	1.0733	1.05995	1.04148	1.04387	0.280156
Ciclev10018714m	pacid=20807640 transcript=Ciclev10018714m locus=Ciclev10018714m.g ID=Ciclev10018714m.v1.0 annot-version=v1.0	16.15	13	15	24	972	109.944	5.66846	1.07811	1.13871	1.12658	1.11447	1.0716	1.11647	1.06161	1.08323	1.02884	0.280383
Ciclev10031923m	pacid=20803860 transcript=Ciclev10031923m locus=Ciclev10031923m.g ID=Ciclev10031923m.v1.0 annot-version=v1.0	23.12	6	6	26	359	39.6902	7.38623	1.0408	1.06827	1.06733	1.0588	1.14966	1.10896	1.04102	1.09988	0.962653	0.280443
Ciclev10002376m	pacid=20787893 transcript=Ciclev10002376m locus=Ciclev10002376m.g ID=Ciclev10002376m.v1.0 annot-version=v1.0	53.51	10	11	46	228	26.2235	8.48486	0.989537	0.914934	1.06893	0.991134	1.12704	1.04734	1.00969	1.06136	0.933838	0.280599
Ciclev10028361m	pacid=20813892 transcript=Ciclev10028361m locus=Ciclev10028361m.g ID=Ciclev10028361m.v1.0 annot-version=v1.0	11.28	2	4	15	470	49.4424	7.76709		1.18692	0.923465	1.05519		0.827825	0.887884	0.857854	1.23003	0.281574
Ciclev10016687m	pacid=20817701 transcript=Ciclev10016687m locus=Ciclev10016687m.g ID=Ciclev10016687m.v1.0 annot-version=v1.0	65.4	6	11	67	211	23.1496	7.41553	0.777532	0.968843	0.883452	0.876609	0.825992	0.812786	0.778227	0.805668	1.08805	0.282208
Ciclev10031852m	pacid=20805661 transcript=Ciclev10031852m locus=Ciclev10031852m.g ID=Ciclev10031852m.v1.0 annot-version=v1.0	23.4	5	5	8	376	38.646	9.80322	0.957655	0.905682	0.929585	0.930974	1.041	0.891628	1.24364	1.05876	0.879309	0.282968
Ciclev10031766m	pacid=20803232 transcript=Ciclev10031766m locus=Ciclev10031766m.g ID=Ciclev10031766m.v1.0 annot-version=v1.0	9.18	3	3	6	392	43.3688	5.89697	1.01734	1.19842	0.993181	1.06965	1.03423	0.999739	0.873654	0.969208	1.10363	0.283228
Ciclev10014057m	pacid=20815809 transcript=Ciclev10014057m locus=Ciclev10014057m.g ID=Ciclev10014057m.v1.0 annot-version=v1.0	3.71	4	4	7	1293	132.854	8.92432		1.01038	0.709365	0.859874		0.698753	0.48403	0.591391	1.45398	0.28358
Ciclev10025991m	pacid=20801827 transcript=Ciclev10025991m locus=Ciclev10025991m.g ID=Ciclev10025991m.v1.0 annot-version=v1.0	5.23	2	2	3	344	39.0594	6.53662		1.13402	0.889404	1.01171	0.987948	0.783591	0.735767	0.835769	1.21051	0.284047
Ciclev10002401m	pacid=20788696 transcript=Ciclev10002401m locus=Ciclev10002401m.g ID=Ciclev10002401m.v1.0 annot-version=v1.0	6.31	2	2	3	222	24.5609	9.31982	1.08525		1.05268	1.06896	1.09911		1.21919	1.15915	0.922196	0.284176
Ciclev10008422m	pacid=20796088 transcript=Ciclev10008422m locus=Ciclev10008422m.g ID=Ciclev10008422m.v1.0 annot-version=v1.0	52.27	18	20	246	419	47.1008	8.5874	0.966178	0.930795	0.942211	0.946395	0.93295	0.992247	1.00452	0.976574	0.969097	0.284371
Ciclev10030963m	pacid=20803024 transcript=Ciclev10030963m locus=Ciclev10030963m.g ID=Ciclev10030963m.v1.0 annot-version=v1.0	26.79	15	15	46	627	68.5674	8.82178	0.900171	0.956658	0.962614	0.939814	0.944481	0.967379	1.01013	0.973997	0.964905	0.284384
Ciclev10016648m	pacid=20815403 transcript=Ciclev10016648m locus=Ciclev10016648m.g ID=Ciclev10016648m.v1.0 annot-version=v1.0	22.12	4	4	16	217	24.8002	9.27588	0.891276	1.01263	0.885929	0.929944	0.92144	1.07668	1.01892	1.00568	0.924692	0.284572
Ciclev10015356m	pacid=20816677 transcript=Ciclev10015356m locus=Ciclev10015356m.g ID=Ciclev10015356m.v1.0 annot-version=v1.0	26.78	9	9	39	422	46.253	5.88428	0.992759	1.11251	1.31741	1.1409	1.06424	1.05635	0.898908	1.0065	1.13353	0.285136
Ciclev10018760m	pacid=20809686 transcript=Ciclev10018760m locus=Ciclev10018760m.g ID=Ciclev10018760m.v1.0 annot-version=v1.0	8.54	5	5	7	913	99.5659	7.57666	1.10231		1.24034	1.17132	1.09667		1.01202	1.05434	1.11095	0.285331
Ciclev10012642m	pacid=20799166 transcript=Ciclev10012642m locus=Ciclev10012640m.g ID=Ciclev10012642m.v1.0 annot-version=v1.0	46.12	7	7	47	232	24.4469	8.77783	1.13451	1.38904	1.14365	1.2224	1.02583	1.17564	1.11821	1.10656	1.10468	0.285718
Ciclev10026340m	pacid=20801998 transcript=Ciclev10026340m locus=Ciclev10026340m.g ID=Ciclev10026340m.v1.0 annot-version=v1.0	44.18	2	13	149	249	28.3536	10.6382	0.882893	0.964771		0.923832	0.870936	0.689745		0.780341	1.18388	0.285721
Ciclev10028199m	pacid=20814793 transcript=Ciclev10028199m locus=Ciclev10028159m.g ID=Ciclev10028199m.v1.0 annot-version=v1.0	31.43	13	14	50	525	60.3955	7.6792	1.003	1.08229	0.93913	1.00814	1.11534	1.01309	1.0855	1.07131	0.941035	0.285968
Ciclev10008761m	pacid=20795154 transcript=Ciclev10008761m locus=Ciclev10008761m.g ID=Ciclev10008761m.v1.0 annot-version=v1.0	2.52	1	1	2	357	41.7686	6.16357	0.798298		0.70809	0.753194	0.835465		0.807237	0.821351	0.917018	0.286008
Ciclev10006225m	pacid=20791252 transcript=Ciclev10006225m locus=Ciclev10006225m.g ID=Ciclev10006225m.v1.0 annot-version=v1.0	26.23	3	4	72	122	13.6984	9.62744	0.872056	0.949193	0.780344	0.867198	0.886276	0.92438	1.03468	0.948445	0.914337	0.286024
Ciclev10008098m	pacid=20795519 transcript=Ciclev10008098m locus=Ciclev10008098m.g ID=Ciclev10008098m.v1.0 annot-version=v1.0	8.91	3	3	8	494	56.0143	7.31299	1.18346	0.900626	0.739887	0.941326	0.936738	0.658387	0.629332	0.741486	1.26951	0.286208
Ciclev10004187m	pacid=20790588 transcript=Ciclev10004187m locus=Ciclev10004187m.g ID=Ciclev10004187m.v1.0 annot-version=v1.0	10.61	9	11	48	1150	124.754	9.84717	0.981354	0.949848	0.98079	0.970664	1.09061	0.983454	0.978312	1.01746	0.954007	0.28623
Ciclev10020604m	pacid=20807687 transcript=Ciclev10020604m locus=Ciclev10020604m.g ID=Ciclev10020604m.v1.0 annot-version=v1.0	9.47	3	3	10	380	42.5794	6.29053	1.04999	0.849103	0.836798	0.911962	1.07584	0.986912	0.959086	1.00728	0.905372	0.286426
Ciclev10032989m	pacid=20805515 transcript=Ciclev10032989m locus=Ciclev10032989m.g ID=Ciclev10032989m.v1.0 annot-version=v1.0	4.64	1	1	3	151	17.6012	5.2749	1.03825	0.793906	0.897728	0.909962	1.09914	0.936645	1.0072	1.01433	0.897107	0.286845
Ciclev10020721m	pacid=20807101 transcript=Ciclev10020721m locus=Ciclev10019825m.g ID=Ciclev10020721m.v1.0 annot-version=v1.0	21.8	8	8	16	367	41.1246	9.21729	1.18257	0.961819	1.05783	1.06741	1.02627	0.974779	0.952427	0.984492	1.08422	0.286892
Ciclev10032494m	pacid=20803323 transcript=Ciclev10032494m locus=Ciclev10032494m.g ID=Ciclev10032494m.v1.0 annot-version=v1.0	54.83	6	19	287	259	29.3546	10.272	0.84461	0.812321	0.97835	0.878427	0.990478	0.889661	0.975	0.951713	0.922996	0.287001
Ciclev10000871m	pacid=20786451 transcript=Ciclev10000871m locus=Ciclev10000871m.g ID=Ciclev10000871m.v1.0 annot-version=v1.0	34.62	14	14	63	520	57.8477	6.48096	0.872489	1.01254	0.936703	0.940576	1.01008	0.9453	1.0573	1.00423	0.936618	0.287189
Ciclev10004626m	pacid=20791752 transcript=Ciclev10004626m locus=Ciclev10004626m.g ID=Ciclev10004626m.v1.0 annot-version=v1.0	33.45	16	18	117	577	63.3253	7.06396	1.01414	0.888876	0.943359	0.948792	1.02611	0.945911	1.05216	1.00806	0.941204	0.287441
Ciclev10029739m	pacid=20812616 transcript=Ciclev10029739m locus=Ciclev10029658m.g ID=Ciclev10029739m.v1.0 annot-version=v1.0	31.51	2	2	4	73	8.27006	4.77979	1.35744		1.10673	1.23209	1.09659		0.952648	1.02462	1.20248	0.287672
Ciclev10011888m	pacid=20797314 transcript=Ciclev10011888m locus=Ciclev10011886m.g ID=Ciclev10011888m.v1.0 annot-version=v1.0	32.25	7	9	73	400	42.2903	4.94482	1.12632	0.885441	0.989604	1.00045	0.979144	0.846354	0.880689	0.902062	1.10907	0.287677
Ciclev10020508m	pacid=20807047 transcript=Ciclev10020508m locus=Ciclev10019625m.g ID=Ciclev10020508m.v1.0 annot-version=v1.0	12.47	3	3	8	393	40.0827	7.34229	1.0824	1.2078	1.14456	1.14492	1.2502	0.818812	0.823948	0.964319	1.18728	0.287869
Ciclev10019005m	pacid=20806941 transcript=Ciclev10019005m locus=Ciclev10019005m.g ID=Ciclev10019005m.v1.0 annot-version=v1.0	21.08	15	15	78	740	83.1125	8.85107	0.934101	0.918517	0.954324	0.935647	0.906742	1.01042	1.05834	0.991834	0.943351	0.28829
Ciclev10024328m	pacid=20809754 transcript=Ciclev10024328m locus=Ciclev10024328m.g ID=Ciclev10024328m.v1.0 annot-version=v1.0	15.79	3	4	12	323	34.5993	6.03662	0.994192		1.34478	1.16949	0.862862		0.956309	0.909585	1.28574	0.288332
Ciclev10024973m	pacid=20800176 transcript=Ciclev10024973m locus=Ciclev10024949m.g ID=Ciclev10024973m.v1.0 annot-version=v1.0	8.84	6	6	18	747	80.4791	6.88818	1.46799	1.1535	1.1109	1.24413	1.13009	1.10339	1.08301	1.10549	1.12541	0.288697
Ciclev10002765m	pacid=20789304 transcript=Ciclev10002765m locus=Ciclev10002756m.g ID=Ciclev10002765m.v1.0 annot-version=v1.0	44.74	2	4	177	152	15.0854	5.87158	1.04962	0.972263	1.0349	1.01893	0.94305	0.952579	1.029	0.974876	1.04519	0.289252
Ciclev10007818m	pacid=20794800 transcript=Ciclev10007818m locus=Ciclev10007818m.g ID=Ciclev10007818m.v1.0 annot-version=v1.0	16.98	8	8	21	589	64.338	6.85889	0.903471	0.874861	0.920346	0.899559	0.953465	0.885737	0.957693	0.932298	0.964884	0.289353
Ciclev10012011m	pacid=20798054 transcript=Ciclev10012011m locus=Ciclev10012011m.g ID=Ciclev10012011m.v1.0 annot-version=v1.0	27.52	7	8	37	367	40.0178	7.28369	1.3875	1.10404	1.4392	1.31025	1.29065	1.08061	1.10823	1.15983	1.12969	0.289389
Ciclev10027380m	pacid=20799947 transcript=Ciclev10027380m locus=Ciclev10027380m.g ID=Ciclev10027380m.v1.0 annot-version=v1.0	7.42	4	4	12	728	79.9099	5.56689	0.763044	1.02631	0.912642	0.900665	0.905501	1.12478	1.03528	1.02185	0.881404	0.289395
Ciclev10024923m	pacid=20800167 transcript=Ciclev10024923m locus=Ciclev10024922m.g ID=Ciclev10024923m.v1.0 annot-version=v1.0	10.1	6	6	9	792	90.4388	5.07178	1.00861		0.822212	0.915409	1.0136		1.13435	1.07398	0.852355	0.289483
Ciclev10031045m	pacid=20804815 transcript=Ciclev10031045m locus=Ciclev10031045m.g ID=Ciclev10031045m.v1.0 annot-version=v1.0	23.17	10	10	36	587	63.2811	7.23975	0.922721	0.97202	1.00429	0.966345	0.854713	0.961152	0.936815	0.91756	1.05317	0.289517
Ciclev10031993m	pacid=20803084 transcript=Ciclev10031993m locus=Ciclev10031993m.g ID=Ciclev10031993m.v1.0 annot-version=v1.0	43.31	16	16	110	344	38.9158	5.26221	0.87587	0.959178	0.982951	0.939333	0.951342	1.00563	0.994213	0.98373	0.954869	0.289912
Ciclev10020054m	pacid=20806610 transcript=Ciclev10020054m locus=Ciclev10020054m.g ID=Ciclev10020054m.v1.0 annot-version=v1.0	18.79	10	10	55	463	52.9478	8.77783	0.961459	0.928546	0.914747	0.934917	0.939447	0.974756	0.953585	0.955929	0.97802	0.289914
Ciclev10030880m	pacid=20802555 transcript=Ciclev10030880m locus=Ciclev10030880m.g ID=Ciclev10030880m.v1.0 annot-version=v1.0	25.88	14	14	41	684	77.2396	5.17334	0.977695	0.971419	0.929134	0.959416	1.03757	0.973281	0.966905	0.992587	0.966582	0.290209
Ciclev10001503m	pacid=20786860 transcript=Ciclev10001503m locus=Ciclev10001494m.g ID=Ciclev10001503m.v1.0 annot-version=v1.0	19.74	5	5	7	380	42.555	8.41162		1.28586	1.12232	1.20409		1.35293	1.3	1.32647	0.907744	0.290499
Ciclev10002025m	pacid=20787085 transcript=Ciclev10002025m locus=Ciclev10002025m.g ID=Ciclev10002025m.v1.0 annot-version=v1.0	10.51	3	3	5	295	32.6956	5.79541	0.986666	0.994687	0.999801	0.993718	1.07026	0.963696	1.0946	1.04285	0.952885	0.290553
Ciclev10030200m	pacid=20814370 transcript=Ciclev10030200m locus=Ciclev10030200m.g ID=Ciclev10030200m.v1.0 annot-version=v1.0	12.2	3	3	7	254	28.4043	6.59521	0.706772	0.907375	0.883319	0.832489	0.63783	0.785476	0.782905	0.735404	1.13202	0.291022
Ciclev10025519m	pacid=20800554 transcript=Ciclev10025519m locus=Ciclev10025398m.g ID=Ciclev10025519m.v1.0 annot-version=v1.0	13.87	5	5	16	476	53.1763	6.30322	1.01191	1.0721	1.09062	1.05821	1.06446	1.0914	1.12814	1.09467	0.966696	0.292275
Ciclev10032308m	pacid=20802831 transcript=Ciclev10032308m locus=Ciclev10032308m.g ID=Ciclev10032308m.v1.0 annot-version=v1.0	24.48	4	6	19	286	30.4149	8.83643	1.01678	1.16741	1.02919	1.07113	0.902657	0.977516	1.07839	0.986189	1.08613	0.292698
Ciclev10007993m	pacid=20792857 transcript=Ciclev10007993m locus=Ciclev10007993m.g ID=Ciclev10007993m.v1.0 annot-version=v1.0	7.43	2	4	12	525	57.8257	7.38623	1.14192	0.844131	1.01034	0.998799	1.15133	1.10133	1.06852	1.10706	0.902209	0.292837
Ciclev10012369m	pacid=20798193 transcript=Ciclev10012369m locus=Ciclev10012370m.g ID=Ciclev10012369m.v1.0 annot-version=v1.0	20.83	5	6	32	288	31.5322	5.93506	1.06896		1.02206	1.04551	1.09642		1.32683	1.21163	0.862896	0.293206
Ciclev10032695m	pacid=20805709 transcript=Ciclev10032695m locus=Ciclev10032621m.g ID=Ciclev10032695m.v1.0 annot-version=v1.0	31.53	4	5	43	222	25.2939	4.80518	0.962032	1.31622	1.05706	1.11177	0.943374	1.00415	0.997573	0.9817	1.1325	0.293208
Ciclev10025353m	pacid=20800781 transcript=Ciclev10025353m locus=Ciclev10025353m.g ID=Ciclev10025353m.v1.0 annot-version=v1.0	27.95	7	10	62	526	57.7441	8.25049	1.26242	0.973131	1.08028	1.10528	1.1772	1.18395	1.28634	1.21583	0.909073	0.293626
Ciclev10028565m	pacid=20813393 transcript=Ciclev10028565m locus=Ciclev10028565m.g ID=Ciclev10028565m.v1.0 annot-version=v1.0	16.79	5	6	13	405	43.0951	4.69092	1.02275	1.0438	0.994599	1.02038	0.956807	1.03079	0.978876	0.988824	1.03192	0.294013
Ciclev10028110m	pacid=20813958 transcript=Ciclev10028110m locus=Ciclev10028110m.g ID=Ciclev10028110m.v1.0 annot-version=v1.0	3.19	1	2	7	564	63.1844	5.68115	0.986802		1.1479	1.06735	0.985982		0.77512	0.880551	1.21214	0.294476
Ciclev10028657m	pacid=20812308 transcript=Ciclev10028657m locus=Ciclev10028639m.g ID=Ciclev10028657m.v1.0 annot-version=v1.0	2.91	1	1	2	378	41.4184	7.35693		1.13594	0.972178	1.05406		0.942956	0.934294	0.938625	1.12298	0.294502
Ciclev10009962m	pacid=20796108 transcript=Ciclev10009962m locus=Ciclev10009962m.g ID=Ciclev10009962m.v1.0 annot-version=v1.0	16.52	2	2	3	115	12.2285	5.36377	1.09677		1.00278	1.04977	1.10092		1.14267	1.1218	0.935796	0.296312
Ciclev10021784m	pacid=20809339 transcript=Ciclev10021784m locus=Ciclev10021784m.g ID=Ciclev10021784m.v1.0 annot-version=v1.0	9.3	2	2	2	258	28.6482	6.23975	0.869592	0.886126		0.877859	0.835035	0.623002		0.729018	1.20417	0.296552
Ciclev10015407m	pacid=20816606 transcript=Ciclev10015407m locus=Ciclev10015407m.g ID=Ciclev10015407m.v1.0 annot-version=v1.0	31.96	8	10	44	413	45.783	6.55127	0.965658		1.01461	0.990135	1.15046		1.02195	1.08621	0.911552	0.297167
Ciclev10014017m	pacid=20818277 transcript=Ciclev10014017m locus=Ciclev10014017m.g ID=Ciclev10014017m.v1.0 annot-version=v1.0	3.67	6	6	8	1824	192.386	6.23975	0.980468	1.13555	1.12645	1.08082	0.913318	1.02059	1.06574	0.999882	1.08095	0.297192
Ciclev10023263m	pacid=20808741 transcript=Ciclev10023263m locus=Ciclev10023263m.g ID=Ciclev10023263m.v1.0 annot-version=v1.0	6.49	2	2	5	416	46.6279	6.72705	1.1014	1.147	1.46892	1.2391	1.10975	1.03848	1.13986	1.09603	1.13054	0.297303
Ciclev10012200m	pacid=20798926 transcript=Ciclev10012200m locus=Ciclev10012200m.g ID=Ciclev10012200m.v1.0 annot-version=v1.0	7.45	2	2	16	322	34.6722	9.65674	1.13883	1.09886	1.09118	1.10962	1.01815	1.14576	0.966208	1.04337	1.06349	0.297451
Ciclev10031300m	pacid=20802602 transcript=Ciclev10031300m locus=Ciclev10031300m.g ID=Ciclev10031300m.v1.0 annot-version=v1.0	20	8	8	25	505	57.6925	6.48096	1.22609	1.04011	1.00431	1.09017	0.990496	1.06479	0.932987	0.99609	1.09445	0.297509
Ciclev10032300m	pacid=20805033 transcript=Ciclev10032300m locus=Ciclev10032300m.g ID=Ciclev10032300m.v1.0 annot-version=v1.0	23.69	6	6	51	287	30.4496	6.56592	1.01	0.976518	0.919815	0.968778	1.00154	1.01001	0.991217	1.00092	0.967883	0.297707
Ciclev10014440m	pacid=20815597 transcript=Ciclev10014440m locus=Ciclev10014440m.g ID=Ciclev10014440m.v1.0 annot-version=v1.0	2.39	2	2	3	711	78.5261	6.771	1.17059		1.07468	1.12264	1.01285		1.07384	1.04335	1.076	0.297711
Ciclev10001702m	pacid=20788779 transcript=Ciclev10001702m locus=Ciclev10001702m.g ID=Ciclev10001702m.v1.0 annot-version=v1.0	38.04	7	10	55	347	38.1541	8.51416	1.0518	0.905361	0.789355	0.915504	0.841975	0.753383	0.856308	0.817222	1.12026	0.299241
Ciclev10007427m	pacid=20795264 transcript=Ciclev10007427m locus=Ciclev10007427m.g ID=Ciclev10007427m.v1.0 annot-version=v1.0	10.54	9	9	23	854	93.4807	6.62451	0.9007	0.897132	0.977916	0.925249	1.00212	0.975588	0.923326	0.96701	0.956814	0.299623
Ciclev10008501m	pacid=20793313 transcript=Ciclev10008501m locus=Ciclev10008501m.g ID=Ciclev10008501m.v1.0 annot-version=v1.0	8.42	3	3	11	404	43.2145	9.23193	1.16358	0.924778	1.19921	1.09586	1.07732	0.919792	0.934158	0.977091	1.12155	0.299659
Ciclev10031858m	pacid=20804912 transcript=Ciclev10031858m locus=Ciclev10031858m.g ID=Ciclev10031858m.v1.0 annot-version=v1.0	33.07	9	9	69	375	40.4721	8.82178	1.23688	1.00719	1.07524	1.10644	1.03839	1.06969	0.915771	1.00795	1.09771	0.299725
Ciclev10019831m	pacid=20810707 transcript=Ciclev10019831m locus=Ciclev10019831m.g ID=Ciclev10019831m.v1.0 annot-version=v1.0	33.73	12	15	105	498	56.2127	6.20166	1.26779	1.48392	1.19098	1.31423	1.08139	1.31697	1.1431	1.18049	1.11329	0.300396
Ciclev10028909m	pacid=20813058 transcript=Ciclev10028909m locus=Ciclev10028909m.g ID=Ciclev10028909m.v1.0 annot-version=v1.0	19.54	5	5	11	307	33.111	9.33447	0.981669	0.752865		0.867267	1.17183	0.977657		1.07474	0.806951	0.300889
Ciclev10022601m	pacid=20809421 transcript=Ciclev10022601m locus=Ciclev10022601m.g ID=Ciclev10022601m.v1.0 annot-version=v1.0	41.72	2	9	115	163	18.4823	10.7847	0.887526		0.766227	0.826877	0.940673		0.893193	0.916933	0.901785	0.300901
Ciclev10022058m	pacid=20811616 transcript=Ciclev10022058m locus=Ciclev10021889m.g ID=Ciclev10022058m.v1.0 annot-version=v1.0	25.97	7	7	50	231	25.4221	8.73389	1.02757	1.12536	1.21229	1.12174	1.0185	1.06281	1.0824	1.05457	1.06369	0.301021
Ciclev10002668m	pacid=20788264 transcript=Ciclev10002668m locus=Ciclev10002668m.g ID=Ciclev10002668m.v1.0 annot-version=v1.0	42.53	3	5	48	174	19.342	8.33838	0.937891	0.857537	1.008	0.934474	0.912634	0.786229	0.895339	0.864734	1.08065	0.301093
Ciclev10013114m	pacid=20798010 transcript=Ciclev10013114m locus=Ciclev10013114m.g ID=Ciclev10013114m.v1.0 annot-version=v1.0	23.2	3	3	42	125	13.1525	8.63135	1.12972	1.10831	1.06376	1.10059	1.12589	0.996499	1.02275	1.04838	1.0498	0.301104
Ciclev10020183m	pacid=20811822 transcript=Ciclev10020183m locus=Ciclev10020183m.g ID=Ciclev10020183m.v1.0 annot-version=v1.0	18.86	8	8	24	440	47.5176	8.86572	0.78029	0.829578	0.984213	0.864694	0.905202	0.919687	1.02717	0.950687	0.909546	0.301112
Ciclev10011145m	pacid=20797967 transcript=Ciclev10011145m locus=Ciclev10011145m.g ID=Ciclev10011145m.v1.0 annot-version=v1.0	11.56	7	7	14	744	83.5542	6.93213	1.1321	0.90116	1.02886	1.02071	0.89972	0.939364	0.973504	0.937529	1.08872	0.301129
Ciclev10031457m	pacid=20805594 transcript=Ciclev10031457m locus=Ciclev10031457m.g ID=Ciclev10031457m.v1.0 annot-version=v1.0	19.65	9	9	14	463	52.6064	5.36377	0.985051		0.952667	0.968859	1.01896		0.984274	1.00162	0.967295	0.301442
Ciclev10005196m	pacid=20790061 transcript=Ciclev10005196m locus=Ciclev10005196m.g ID=Ciclev10005196m.v1.0 annot-version=v1.0	50.13	14	15	107	373	41.1208	7.04932	1.0078	0.984227	0.989495	0.993842	1.00015	0.97281	0.906531	0.959832	1.03543	0.301574
Ciclev10014097m	pacid=20815443 transcript=Ciclev10014097m locus=Ciclev10014097m.g ID=Ciclev10014097m.v1.0 annot-version=v1.0	17.41	16	17	83	1114	123.405	4.90674	0.968146	1.12015	1.01826	1.03552	1.03024	0.934285	0.951495	0.972006	1.06534	0.301601
Ciclev10000556m	pacid=20788206 transcript=Ciclev10000556m locus=Ciclev10000409m.g ID=Ciclev10000556m.v1.0 annot-version=v1.0	12.29	8	8	29	643	72.4016	6.68311	0.991248	1.05177	1.00732	1.01678	1.03312	0.85856	0.967068	0.952915	1.06702	0.30249
Ciclev10008900m	pacid=20793758 transcript=Ciclev10008900m locus=Ciclev10008900m.g ID=Ciclev10008900m.v1.0 annot-version=v1.0	48.78	15	15	84	328	35.9965	8.60205	0.962409	1.03378	1.00311	0.999767	0.967796	1.08177	1.16468	1.07141	0.933128	0.303242
Ciclev10011052m	pacid=20798944 transcript=Ciclev10011052m locus=Ciclev10011052m.g ID=Ciclev10011052m.v1.0 annot-version=v1.0	7.97	5	6	14	853	97.2452	7.66455	1.15162	0.981123		1.06637	1.19874	1.17122		1.18498	0.899908	0.30329
Ciclev10011637m	pacid=20796976 transcript=Ciclev10011637m locus=Ciclev10011637m.g ID=Ciclev10011637m.v1.0 annot-version=v1.0	22.48	12	12	67	476	51.8022	5.19873	0.890953	0.809283	1.00784	0.902691	0.985897	0.935915	1.0021	0.974636	0.926182	0.303329
Ciclev10014751m	pacid=20817242 transcript=Ciclev10014751m locus=Ciclev10014751m.g ID=Ciclev10014751m.v1.0 annot-version=v1.0	4.21	2	2	3	570	63.6298	6.93213		1.03339	1.17389	1.10364		0.913724	1.03694	0.975331	1.13155	0.303361
Ciclev10021424m	pacid=20810515 transcript=Ciclev10021424m locus=Ciclev10021423m.g ID=Ciclev10021424m.v1.0 annot-version=v1.0	16.27	4	4	19	295	32.4858	8.33838	1.17292	0.984243	1.07626	1.07781	0.995846	0.951822	1.06208	1.00325	1.07432	0.303487
Ciclev10016874m	pacid=20818484 transcript=Ciclev10016874m locus=Ciclev10016586m.g ID=Ciclev10016874m.v1.0 annot-version=v1.0	30.77	4	4	45	182	21.0139	5.16064	0.935792	1.09236	0.89703	0.975059	1.04283	1.14286	0.998988	1.06156	0.918516	0.303526
Ciclev10020253m	pacid=20811303 transcript=Ciclev10020253m locus=Ciclev10020253m.g ID=Ciclev10020253m.v1.0 annot-version=v1.0	12.38	4	4	6	428	46.9069	7.54736		0.992583	0.955442	0.974013		0.809291	0.945264	0.877278	1.11027	0.303534
Ciclev10008258m	pacid=20792865 transcript=Ciclev10008258m locus=Ciclev10008258m.g ID=Ciclev10008258m.v1.0 annot-version=v1.0	1.76	1	1	2	454	49.7867	5.64307		1.24683	1.03268	1.13976		1.2685	1.31045	1.28948	0.883888	0.303641
Ciclev10019038m	pacid=20807295 transcript=Ciclev10019038m locus=Ciclev10019038m.g ID=Ciclev10019038m.v1.0 annot-version=v1.0	31.77	21	21	88	727	82.9105	7.6499	0.984245	0.917262	0.948407	0.949971	1.03428	1.00468	0.935245	0.991403	0.958209	0.303911
Ciclev10002311m	pacid=20786658 transcript=Ciclev10002311m locus=Ciclev10002311m.g ID=Ciclev10002311m.v1.0 annot-version=v1.0	47.72	9	9	58	241	26.3503	7.02002	0.974109	1.12413	0.867135	0.988458	1.00381	1.13323	1.13252	1.08985	0.906963	0.304014
Ciclev10018748m	pacid=20811584 transcript=Ciclev10018748m locus=Ciclev10018748m.g ID=Ciclev10018748m.v1.0 annot-version=v1.0	8.86	6	7	9	937	105.602	6.99072	0.984588	0.804321	0.771977	0.853629	0.953029	0.947333	0.901186	0.933849	0.914097	0.304399
Ciclev10020023m	pacid=20805945 transcript=Ciclev10020023m locus=Ciclev10020016m.g ID=Ciclev10020023m.v1.0 annot-version=v1.0	18.16	7	7	42	468	50.4352	7.98682	1.34289	1.19845	1.17045	1.23727	1.23763	1.3184	1.42335	1.32646	0.932758	0.304533
Ciclev10020986m	pacid=20811423 transcript=Ciclev10020986m locus=Ciclev10020988m.g ID=Ciclev10020986m.v1.0 annot-version=v1.0	8.21	2	2	5	341	34.8725	10.2134	1.20858	0.930931	0.897971	1.01249	0.967239	0.865539	0.827216	0.886665	1.14191	0.304806
Ciclev10020061m	pacid=20808118 transcript=Ciclev10020061m locus=Ciclev10020061m.g ID=Ciclev10020061m.v1.0 annot-version=v1.0	32.9	11	13	87	462	51.4644	8.71924	1.01928	0.991811	0.925133	0.978741	1.00979	0.997588	1.0347	1.01403	0.965203	0.304889
Ciclev10018940m	pacid=20811838 transcript=Ciclev10018940m locus=Ciclev10018730m.g ID=Ciclev10018940m.v1.0 annot-version=v1.0	6.17	3	3	9	778	88.1964	5.74463	0.906712	1.06147	1.31971	1.09596	0.972802	1.0664	0.464607	0.834602	1.31316	0.305113
Ciclev10025300m	pacid=20800815 transcript=Ciclev10025300m locus=Ciclev10025300m.g ID=Ciclev10025300m.v1.0 annot-version=v1.0	38.6	21	21	110	557	62.6131	4.95752	0.969255	1.00305	0.989131	0.987147	0.97587	1.04103	1.0207	1.01253	0.974928	0.305122
Ciclev10020212m	pacid=20810556 transcript=Ciclev10020212m locus=Ciclev10020212m.g ID=Ciclev10020212m.v1.0 annot-version=v1.0	24.65	7	9	55	434	49.0053	7.2251	1.25136	1.70714	1.36772	1.44207	1.43002	1.94224	1.66422	1.67883	0.858976	0.305218
Ciclev10016873m	pacid=20818289 transcript=Ciclev10016873m locus=Ciclev10016873m.g ID=Ciclev10016873m.v1.0 annot-version=v1.0	50	9	9	266	182	20.758	9.96436	1.00157	0.916982	0.825945	0.914831	0.973485	0.96836	0.981835	0.97456	0.938712	0.305389
Ciclev10011926m	pacid=20796736 transcript=Ciclev10011926m locus=Ciclev10011926m.g ID=Ciclev10011926m.v1.0 annot-version=v1.0	14.32	4	4	21	391	42.0812	6.59521	1.2445		0.825775	1.03514	0.948762	0.798172	0.647249	0.798061	1.29707	0.305424
Ciclev10009015m	pacid=20794389 transcript=Ciclev10009015m locus=Ciclev10009015m.g ID=Ciclev10009015m.v1.0 annot-version=v1.0	23.93	8	8	34	305	34.2212	5.92236	1.02395	1.04103	1.06572	1.04357	1.02125	1.09633	1.17751	1.09836	0.950113	0.305939
Ciclev10014800m	pacid=20818284 transcript=Ciclev10014800m locus=Ciclev10014800m.g ID=Ciclev10014800m.v1.0 annot-version=v1.0	8.89	5	5	10	551	60.6884	5.2749	0.96712		1.17821	1.07267	1.01275	0.949279	0.948393	0.970141	1.10568	0.306291
Ciclev10029381m	pacid=20813590 transcript=Ciclev10029381m locus=Ciclev10029381m.g ID=Ciclev10029381m.v1.0 annot-version=v1.0	28.41	4	4	12	176	20.158	4.70361	0.917379	0.976611	1.17473	1.02291	0.930327	1.00917	0.726223	0.888574	1.15118	0.306639
Ciclev10022085m	pacid=20808608 transcript=Ciclev10022085m locus=Ciclev10022085m.g ID=Ciclev10022085m.v1.0 annot-version=v1.0	3.1	1	1	2	226	25.122	6.78564	1.19154	1.00944		1.10049	1.24683	1.20747		1.22715	0.896785	0.306938
Ciclev10014202m	pacid=20819066 transcript=Ciclev10014202m locus=Ciclev10014202m.g ID=Ciclev10014202m.v1.0 annot-version=v1.0	20.62	10	18	102	897	101.796	6.45557	0.801685	1.00996	0.768572	0.860073	0.89266	0.683811	0.59852	0.724997	1.18631	0.307167
Ciclev10006153m	pacid=20791929 transcript=Ciclev10006153m locus=Ciclev10006148m.g ID=Ciclev10006153m.v1.0 annot-version=v1.0	26.17	3	3	6	149	16.8085	4.84326	1.0727		1.00227	1.03748	0.920925		1.00505	0.962986	1.07736	0.307376
Ciclev10021838m	pacid=20810616 transcript=Ciclev10021838m locus=Ciclev10021838m.g ID=Ciclev10021838m.v1.0 annot-version=v1.0	7.57	2	2	9	251	27.9888	9.71533	1.10629	1.01402	0.801685	0.973998	0.976474	0.773116	0.778832	0.842807	1.15566	0.307438
Ciclev10025743m	pacid=20802138 transcript=Ciclev10025743m locus=Ciclev10025744m.g ID=Ciclev10025743m.v1.0 annot-version=v1.0	50.12	14	14	133	407	43.4578	6.15088	0.989728	1.09898	1.00903	1.03258	1.03393	1.12525	1.08886	1.08268	0.953727	0.30746
Ciclev10004417m	pacid=20792287 transcript=Ciclev10004417m locus=Ciclev10004417m.g ID=Ciclev10004417m.v1.0 annot-version=v1.0	15.88	11	11	19	737	81.7692	5.78271	0.971123	0.744462	0.951741	0.889109	0.986749	0.939655	1.00392	0.976775	0.910249	0.307582
Ciclev10007342m	pacid=20795962 transcript=Ciclev10007342m locus=Ciclev10007342m.g ID=Ciclev10007342m.v1.0 annot-version=v1.0	43.17	35	35	200	989	110.205	5.22412	0.88707	0.959885	0.917712	0.921556	0.950586	0.932966	0.960138	0.947897	0.972211	0.307783
Ciclev10005183m	pacid=20790084 transcript=Ciclev10005183m locus=Ciclev10005183m.g ID=Ciclev10005183m.v1.0 annot-version=v1.0	17.82	5	5	13	376	41.6857	5.47803	0.953829		1.05072	1.00227	1.02678	1.20477	1.06453	1.09869	0.912244	0.307834
Ciclev10018557m	pacid=20808684 transcript=Ciclev10018557m locus=Ciclev10018557m.g ID=Ciclev10018557m.v1.0 annot-version=v1.0	2.24	2	2	5	1206	133.587	6.29053		1.25325	0.997761	1.1255		0.95496	0.95017	0.952565	1.18155	0.308554
Ciclev10015532m	pacid=20815484 transcript=Ciclev10015532m locus=Ciclev10015532m.g ID=Ciclev10015532m.v1.0 annot-version=v1.0	16.33	4	5	10	392	43.9778	9.72998	1.02483	1.00068	0.912899	0.97947	0.947793	0.921842	0.946342	0.938659	1.04348	0.308795
Ciclev10009899m	pacid=20793086 transcript=Ciclev10009899m locus=Ciclev10009899m.g ID=Ciclev10009899m.v1.0 annot-version=v1.0	44.53	6	6	74	128	13.8794	7.12256	0.962605	1.03961	0.924732	0.975649	1.04128	1.06651	0.972588	1.02679	0.950191	0.309051
Ciclev10025283m	pacid=20802103 transcript=Ciclev10025283m locus=Ciclev10025279m.g ID=Ciclev10025283m.v1.0 annot-version=v1.0	28.27	13	13	65	566	61.665	7.54736	1.02447	0.912429	1.02503	0.987308	0.915922	0.901622	0.985486	0.934343	1.05669	0.309345
Ciclev10021999m	pacid=20811782 transcript=Ciclev10021999m locus=Ciclev10021999m.g ID=Ciclev10021999m.v1.0 annot-version=v1.0	12.71	3	3	9	236	26.7559	7.85498	0.886437	1.03642	0.95029	0.957716	1.01107	1.03182	0.988081	1.01032	0.947929	0.309666
Ciclev10011482m	pacid=20798504 transcript=Ciclev10011482m locus=Ciclev10011482m.g ID=Ciclev10011482m.v1.0 annot-version=v1.0	12.64	7	8	24	522	59.6651	5.03369	0.875708	0.997287	0.835931	0.902975	0.969213	0.956828	0.952832	0.959624	0.940967	0.310121
Ciclev10032099m	pacid=20804659 transcript=Ciclev10032099m locus=Ciclev10032099m.g ID=Ciclev10032099m.v1.0 annot-version=v1.0	27.83	6	7	45	327	36.4839	7.31299	0.846025	0.946438	0.858092	0.883518	0.972096	0.940875	0.881453	0.931475	0.948516	0.310507
Ciclev10012043m	pacid=20796612 transcript=Ciclev10012043m locus=Ciclev10012043m.g ID=Ciclev10012043m.v1.0 annot-version=v1.0	44.17	14	14	69	360	40.4117	5.43994	0.950292	0.834796	0.917106	0.900731	0.97882	0.907197	0.956411	0.947476	0.950664	0.310857
Ciclev10019299m	pacid=20809181 transcript=Ciclev10019299m locus=Ciclev10019299m.g ID=Ciclev10019299m.v1.0 annot-version=v1.0	14.47	7	7	20	629	69.6719	6.0874	0.883587	1.16195	0.567482	0.871007	0.941002	0.315762	0.470895	0.575886	1.51246	0.31088
Ciclev10008224m	pacid=20794270 transcript=Ciclev10008224m locus=Ciclev10008224m.g ID=Ciclev10008224m.v1.0 annot-version=v1.0	52.94	21	22	213	459	50.1256	8.71924	0.98552	1.04152	1.05423	1.02709	1.00655	1.10213	1.10868	1.07245	0.957701	0.311343
Ciclev10012010m	pacid=20799066 transcript=Ciclev10012010m locus=Ciclev10011861m.g ID=Ciclev10012010m.v1.0 annot-version=v1.0	54.35	19	19	147	368	42.7342	5.26221	1.04115	0.96625	1.09792	1.03511	1.08579	1.07859	1.07388	1.07942	0.958948	0.311523
Ciclev10019973m	pacid=20810089 transcript=Ciclev10019973m locus=Ciclev10019973m.g ID=Ciclev10019973m.v1.0 annot-version=v1.0	21.64	2	10	63	476	52.3457	8.90967	0.609468	0.998481		0.803974	1.04789	1.08461		1.06625	0.754021	0.311535
Ciclev10021001m	pacid=20806772 transcript=Ciclev10021001m locus=Ciclev10020731m.g ID=Ciclev10021001m.v1.0 annot-version=v1.0	38.05	12	12	130	339	38.0204	4.61475	1.0042	1.05997	1.1315	1.06522	1.05656	1.18885	1.13493	1.12678	0.945369	0.311787
Ciclev10019810m	pacid=20806133 transcript=Ciclev10019810m locus=Ciclev10019810m.g ID=Ciclev10019810m.v1.0 annot-version=v1.0	24.65	9	10	31	503	56.9539	8.52881	1.01694	1.08252	1.4114	1.17029	1.28364	1.2203	1.57384	1.35926	0.860973	0.312143
Ciclev10016104m	pacid=20816001 transcript=Ciclev10016104m locus=Ciclev10015416m.g ID=Ciclev10016104m.v1.0 annot-version=v1.0	7.41	2	2	4	297	32.8075	9.36377		0.53356	0.988283	0.760921		1.02279	1.12277	1.07278	0.709299	0.312293
Ciclev10032973m	pacid=20802498 transcript=Ciclev10032973m locus=Ciclev10032973m.g ID=Ciclev10032973m.v1.0 annot-version=v1.0	72.08	13	13	104	154	16.8907	5.26221	1.28695	1.20823	1.16014	1.21844	1.34853	1.23396	1.2509	1.2778	0.953546	0.312363
Ciclev10028799m	pacid=20813872 transcript=Ciclev10028799m locus=Ciclev10028799m.g ID=Ciclev10028799m.v1.0 annot-version=v1.0	8.58	2	3	8	338	37.1675	7.72314	0.718304	0.844099	0.725223	0.762542	0.624285	0.811913	0.536963	0.657721	1.15937	0.31264
Ciclev10028037m	pacid=20812385 transcript=Ciclev10028037m locus=Ciclev10028037m.g ID=Ciclev10028037m.v1.0 annot-version=v1.0	5.52	2	3	10	616	69.6815	5.021	0.943713	0.883138	0.635039	0.82063	1.10664	0.944013	0.836407	0.962353	0.852733	0.312812
Ciclev10007232m	pacid=20794829 transcript=Ciclev10007232m locus=Ciclev10007232m.g ID=Ciclev10007232m.v1.0 annot-version=v1.0	3.13	2	6	8	1851	201.975	6.23975	1.18367	0.995938		1.0898	0.886868	0.999843		0.943355	1.15524	0.313064
Ciclev10007372m	pacid=20794790 transcript=Ciclev10007372m locus=Ciclev10007364m.g ID=Ciclev10007372m.v1.0 annot-version=v1.0	41.1	35	35	246	949	106.024	5.92236	0.907784	1.02086	0.91301	0.947219	0.960363	1.04883	0.988631	0.999276	0.947905	0.313157
Ciclev10025929m	pacid=20799578 transcript=Ciclev10025929m locus=Ciclev10025929m.g ID=Ciclev10025929m.v1.0 annot-version=v1.0	48.48	13	14	34	363	39.7601	4.66553	1.14047	1.06938	1.26225	1.15737	1.06381	1.08591	1.11968	1.0898	1.062	0.313218
Ciclev10001209m	pacid=20787275 transcript=Ciclev10001209m locus=Ciclev10000727m.g ID=Ciclev10001209m.v1.0 annot-version=v1.0	15.47	4	6	60	433	46.8561	6.17627	1.24918	1.11976	1.02602	1.13166	1.05118	1.07418	1.04391	1.05643	1.07121	0.313687
Ciclev10016146m	pacid=20819172 transcript=Ciclev10016146m locus=Ciclev10016485m.g ID=Ciclev10016146m.v1.0 annot-version=v1.0	67.82	12	15	140	289	31.727	9.53955	0.830028	0.898738	0.972749	0.900505	0.922795	0.972023	0.957703	0.95084	0.947062	0.313795
Ciclev10014996m	pacid=20815376 transcript=Ciclev10014996m locus=Ciclev10014996m.g ID=Ciclev10014996m.v1.0 annot-version=v1.0	8.45	4	4	7	497	55.2954	5.50342	1.09964	1.10218	1.03013	1.07732	0.965441	1.10305	0.999068	1.02252	1.05359	0.314399
Ciclev10032632m	pacid=20803213 transcript=Ciclev10032632m locus=Ciclev10032406m.g ID=Ciclev10032632m.v1.0 annot-version=v1.0	47.86	12	12	58	234	26.3133	6.55127	1.10611	1.24371	1.24492	1.19824	1.02811	1.20789	1.1195	1.1185	1.0713	0.314559
Ciclev10030134m	pacid=20813406 transcript=Ciclev10030134m locus=Ciclev10030134m.g ID=Ciclev10030134m.v1.0 annot-version=v1.0	70.51	15	15	324	217	24.6383	9.83252	0.952468	1.01347	1.01438	0.993441	0.99349	1.05779	1.02435	1.02521	0.969011	0.314583
Ciclev10007423m	pacid=20793523 transcript=Ciclev10007423m locus=Ciclev10007423m.g ID=Ciclev10007423m.v1.0 annot-version=v1.0	19.93	12	12	15	863	96.4179	6.40479	0.767753	0.869916	0.817104	0.818258	0.802406	0.897087	0.910416	0.86997	0.940559	0.314647
Ciclev10004595m	pacid=20791795 transcript=Ciclev10004595m locus=Ciclev10004595m.g ID=Ciclev10004595m.v1.0 annot-version=v1.0	9.75	5	5	13	595	66.5946	7.09326	0.875893	0.776164	0.901523	0.851194	0.812163	0.783836	0.820403	0.805467	1.05677	0.314719
Ciclev10008941m	pacid=20795722 transcript=Ciclev10008941m locus=Ciclev10008941m.g ID=Ciclev10008941m.v1.0 annot-version=v1.0	29.47	9	9	24	319	35.4247	6.80029	0.977071		1.24476	1.11092	0.956689		0.901571	0.92913	1.19565	0.314841
[truncated: 2,074 more rows]

## Sheet: stage 2
Additional file 1 Table S1. All identification proteins in three stages.
"N2" indicates MT in stage2, and "Y2" indicates WT in stage2.
[truncated: 3,769 more rows]

## Sheet: stage 3
Additional file 1 Table S1. All identification proteins in three stages.
[truncated: 3,811 more rows]
